# Supplementary material
Source: PubMed Central journal article supplement (PMC5350607)
Supplement: co7b00009_si_001.pdf [file co7b00009_si_001.pdf]

## Supporting Information

# Two cycles with one catch: hydrazine in Ugi 4-CR and its post-cyclizations

Yuanze Wang<sup>†</sup>, Pravin Patil<sup>†</sup>, Katarzyna Kurpiewska<sup>‡</sup>, Justyna Kalinowska-Tluscik<sup>‡</sup>,  
Alexander Dömling<sup>†\*</sup>

<sup>†</sup>University of Groningen, Department of Drug Design, A. Deusinglaan 1, 9713 AV Groningen, The Netherlands.

<sup>‡</sup>Jagiellonian University, Faculty of Chemistry, Department of Crystal Chemistry and Crystal Physics,  
Biocrystallography Group, Ingardena 3, 30-060 Krakow, Poland.

Fax: (+31)503637582.

E-mail: a.s.s.domling@rug.nl, [www.drugdesign.nl](http://www.drugdesign.nl)

## Contents

|                                                                 |           |
|-----------------------------------------------------------------|-----------|
| General methods . . . . .                                       | S3        |
| Experimental procedures . . . . .                               | S4        |
| $^1\text{H}$ , $^{13}\text{C}$ NMR and mass data . . . . .      | S5-S18    |
| $^1\text{H}$ , $^{13}\text{C}$ NMR and mass spectra's . . . . . | S19-S124  |
| Crystal x-ray structure determination . . . . .                 | S125-S127 |
| References. . . . .                                             | S128      |

## Experiment procedures and Characterization Data of Products

### General methods

All chemicals were purchased from commercial suppliers and used without any purification unless otherwise noted. Nuclear magnetic resonance spectra were recorded. Chemical shifts for  $^1\text{H}$  NMR were reported as  $\delta$  values and coupling constants were in hertz (Hz). The following abbreviations were used for spin multiplicity: s = singlet, bs = broad singlet, d = doublet, t = triplet, q = quartet, quin = quintet, dd = double of doublets, ddd = double of doublet of doublets, m = multiplet. Chemical shifts for  $^{13}\text{C}$  NMR reported in ppm relative to the solvent peak. Thin layer chromatography was performed on silica gel plates (0.20 mm thick, particle size 25  $\mu\text{m}$ ). Flash chromatography was performed using RediSep R<sub>f</sub> Normal-phase Silica Flash Columns (Silica Gel 60 Å, 230-400 mesh). High resolution mass spectra were recorded using a LTQ-Orbitrap-XL (Thermo) at a resolution of 60000@m/z400.

**General procedure A: One pot synthesis of 6 and 7 in acidic conditions:** To the stirred solution of oxo-component (**2**) (2 mmol, 1.0 equiv.) in methanol (1M) at room temperature, was added *tert*-butyl carbazate (**1**) (2 mmol, 1.0 equiv.), (CF<sub>3</sub>SO<sub>3</sub>)<sub>2</sub>Mg (10 mol%), isocyanide (2.1 mmol, 1.05 equiv.) and trimethylsilyl azide (2 mmol, 1.0 equiv.). The resulting mixture was stirred at same temperature for 18h. Then 2M HCl in methanol (2 mL) was added to the reaction mixture and stirred for 4h at same temperature. Solvents were removed under vacuum. The crude product dissolved in dichloromethane (10 mL) and pH of solution was adjusted to basic (pH~8) by ammonium hydroxide solution. The solvents were removed under vacuum. The crude product was purified by flash column chromatography (petroleum ether/ethyl acetate 1:1) to give pure product (**6 and 7**).

**General procedure B: Synthesis of Ugi-tetrazole adduct 5:** To the stirred solution of oxo-component (**2**) (1 mmol, 1.0 equiv.) in methanol (1M) at room temperature, was added *tert*-butyl carbazate (**1**) (1 mmol, 1.0 equiv.), (CF<sub>3</sub>SO<sub>3</sub>)<sub>2</sub>Mg (10 mol%), isocyanide (1.05 mmol, 1.05 equiv.) and trimethylsilyl azide (1 mmol, 1.0 equiv.). The resulting mixture was stirred at same temperature for 18 hr. Solvents were removed under vacuum. The crude product was purified by flash column chromatography (petroleum ether/ethyl acetate 7:3) to give pure product (**5**).

**General procedure C: Synthesis of 8:** To the stirred solution of ugi-tetrazole adduct (**5**) (0.5 mmol, 1.0 equiv.) in methanol (0.5M) at room temperature, was added sodium methoxide (0.5 mmol, 1.0 equiv.). The resulting mixture was stirred at same temperature for 1hr. Solvents were removed under vacuum. The crude product was purified by flash column chromatography (petroleum ether/ethyl acetate 6:4) to give pure product (**8**).

**General procedure D: Synthesis of 9:** The 6-membered cyclized product (**8**) (0.3 mmol) was dissolved in 1 mL 2M HCl/methanol and stirred at room temperature for 18 hr. Solvents were removed under vacuum and the pure product was obtained as hydrochloric salts (**9**).



**6a: 7-amino-5-isobutyl-8,8-dimethyl-7,8-dihydrotetrazolo [1,5-a]pyrazin-6 (5H)-one**

The product was synthesized according to procedure **A** in 2 mmol scale, afforded as white solid (305 mg, 64% yield), M.P.= 195–196 °C; <sup>1</sup>H NMR (500 MHz, CDCl<sub>3</sub>) δ 5.22 (dd, *J* = 7.4, 4.8 Hz, 1H), 4.21 (s, 2H), 2.20 – 2.12 (m, 1H), 2.00 – 1.93 (m, 1H), 1.92 – 1.86 (m, 1H), 1.85 (s, 3H), 1.78 (s, 3H), 0.94 (dd, *J* = 6.6, 2.8 Hz, 6H); <sup>13</sup>C NMR (126 MHz, CDCl<sub>3</sub>) δ 164.3, 154.5, 58.5, 57.9, 43.1, 27.6, 26.6, 24.6, 23.0, 21.7; HRMS calcd for C<sub>10</sub>H<sub>19</sub>N<sub>6</sub>O [M+H]<sup>+</sup>: 239.16149; found [M+H]<sup>+</sup>: 239.16124.

**7a: 5-isobutyl-9,9-dimethyl-8,9-dihydro-5H-tetrazolo[5,1-d][1,2,5]triazepin-6(7H)-one**

The product was synthesized according to procedure **A** in 2 mmol scale, afforded as semi-solid (30 mg, 6% yield), M.P.= 181–183 °C; <sup>1</sup>H NMR (500 MHz, CDCl<sub>3</sub>) δ 8.58 (s, 1H), 5.46 (s, 1H), 4.22 (s, 1H), 2.23 (d, *J* = 7.8 Hz, 2H), 1.64 (d, *J* = 6.7 Hz, 6H), 1.05 (d, *J* = 6.6 Hz, 3H), 0.99 (d, *J* = 5.3 Hz, 3H), 0.96-0.90 (m, 1H); <sup>13</sup>C NMR (126 MHz, DMSO-*d*<sub>6</sub>) δ 171.6, 159.4, 64.8, 57.9, 42.0, 27.1, 25.4, 25.3, 22.4, 22.2; HRMS calcd for C<sub>10</sub>H<sub>19</sub>N<sub>6</sub>O [M+H]<sup>+</sup>: 239.16149; found [M+H]<sup>+</sup>: 239.16144.

**6b: 7-amino-8,8-dimethyl-7,8-dihydrotetrazolo[1,5-a] pyrazine-6(5H)-one**

The product was synthesized according to procedure **A** in 2 mmol scale, afforded as white solid (120 mg, 33% yield), M.P.= 111–113 °C; <sup>1</sup>H NMR (500 MHz, DMSO-*d*<sub>6</sub>) δ 5.29 (s, 2H), 4.86 (s, 2H), 1.68 (s, 6H); <sup>13</sup>C NMR (126 MHz, DMSO-*d*<sub>6</sub>) δ 160.5, 155.3, 57.8, 47.8, 26.7; HRMS calcd for C<sub>6</sub>H<sub>11</sub>N<sub>6</sub>O [M+H]<sup>+</sup>: 183.09889; found [M+H]<sup>+</sup>: 183.09904.

**6c: 7'-amino-5'H-spiro[cyclohexane-1,8'-tetrazolo[1,5-a] pyrazin]-6'(7'H)-one**

The product was synthesized according to procedure **A** in 2 mmol scale, afforded as white solid (30 mg, 7% yield), M.P.= 193–195 °C; <sup>1</sup>H NMR (500 MHz, CDCl<sub>3</sub>) δ 5.14 (s, 2H), 4.22 (s, 2H), 2.55 – 2.41 (m, 2H), 2.25 – 2.07 (m, 2H), 1.86 – 1.79 (m, 1H), 1.78 – 1.71 (m, 2H), 1.71 – 1.64 (m, 2H), 1.34 – 1.22 (m, 1H); <sup>13</sup>C NMR (126 MHz, CDCl<sub>3</sub>) δ 161.5, 153.7, 62.3, 47.3, 33.4, 24.2, 21.6; HRMS calcd for C<sub>9</sub>H<sub>15</sub>N<sub>6</sub>O [M+H]<sup>+</sup>: 223.13019; found [M+H]<sup>+</sup>: 223.13025.

**7c: 7',8'-dihydrospiro[cyclohexane-1,9'-tetrazolo[5,1-d] [1,2,5]triazepin]-6'(5'H)-one**

The product was synthesized according to procedure **A** in 2 mmol scale, afforded as white solid (150 mg, 34% yield), M.P.=162–164 °C; <sup>1</sup>H NMR (500 MHz, DMSO-*d*<sub>6</sub>) δ 9.63 (s, 1H), 6.10

(s, 1H), 5.67 (s, 1H), 4.91 (s, 1H), 1.95 – 1.78 (m, 3H), 1.73 – 1.61 (m, 4H), 1.54 (s, 2H), 1.40 – 1.29 (m, 1H); <sup>13</sup>C NMR (126 MHz, DMSO-*d*<sub>6</sub>) δ 170.0, 160.1, 58.4, 51.6, 32.3, 24.8, 20.1; HRMS calcd for C<sub>9</sub>H<sub>15</sub>N<sub>6</sub>O [M+H]<sup>+</sup>: 223.13019; found [M+H]<sup>+</sup>: 223.13019.

**7d: 9-isobutyl-8,9-dihydro-5*H*-tetrazolo[5,1-*d*][1,2,5] triazepin-6(7*H*)-one**

The product was synthesized according to procedure **A** in 2 mmol scale, afforded as semi-solid (120 mg, 29% yield); <sup>1</sup>H NMR (500 MHz, DMSO-*d*<sub>6</sub>) δ 9.62 (s, 1H), 6.14 (s, 1H), 5.28 (s, 2H), 4.50 – 4.35 (m, 1H), 2.06 – 1.93 (m, 1H), 1.75 – 1.57 (m, 2H), 0.95 (dd, *J* = 13.5, 6.6 Hz, 6H); <sup>13</sup>C NMR (126 MHz, DMSO-*d*<sub>6</sub>) δ 169.6, 156.9, 51.6, 40.5, 23.5, 23.1, 21.4; HRMS calcd for C<sub>8</sub>H<sub>15</sub>N<sub>6</sub>O [M+H]<sup>+</sup>: 211.13019; found [M+H]<sup>+</sup>: 211.13019.

**6e: 7-amino-8-phenethyl-7,8-dihydro-5*H*-tetrazolo[1,5-*a*] pyrazin-6(5*H*)-one**

The product was synthesized according to procedure **A** in 2 mmol scale, afforded as white solid (140 mg, 27% yield), M.P.= 133–135 °C; <sup>1</sup>H NMR (500 MHz, DMSO-*d*<sub>6</sub>) δ 7.32 – 7.09 (m, 5H), 5.36 – 5.21 (m, 2H), 5.13 (s, 2H), 5.06 (s, 1H), 2.72 – 2.58 (m, 1H), 2.45 – 2.37 (m, 2H), 2.36 – 2.28 (m, 1H); <sup>13</sup>C NMR (126 MHz, DMSO-*d*<sub>6</sub>) δ 160.4, 150.5, 140.5, 128.4, 126.0, 55.5, 47.5, 33.2, 29.2; HRMS calcd for C<sub>12</sub>H<sub>15</sub>N<sub>6</sub>O [M+H]<sup>+</sup>: 259.13019; found [M+H]<sup>+</sup>: 259.12990.

**7e: 9-phenethyl-8,9-dihydro-5*H*-tetrazolo[5,1-*d*][1,2,5] triazepin-6(7*H*)-one**

The product was synthesized according to procedure **A** in 2 mmol scale, afforded as semi-solid (50 mg, 10% yield); <sup>1</sup>H NMR (500 MHz, DMSO-*d*<sub>6</sub>) δ 9.72 (s, 1H), 7.46 – 7.09 (m, 5H), 6.29 (s, 1H), 5.43 – 5.13 (m, 2H), 4.42 – 4.29 (m, 1H), 2.91 – 2.74 (m, 2H), 2.18 – 2.07 (m, 1H), 2.11 – 1.95 (m, 1H); <sup>13</sup>C NMR (126 MHz, DMSO-*d*<sub>6</sub>) δ 169.6, 156.4, 141.2, 128.5, 126.0, 55.4, 51.7, 33.5, 30.9; HRMS calcd for C<sub>12</sub>H<sub>15</sub>N<sub>6</sub>O [M+H]<sup>+</sup>: 259.13019; found [M+H]<sup>+</sup>: 259.13008.

**6f: 7-amino-8-isopropyl-7,8-dihydro-5*H*-tetrazolo[1,5-*a*]pyrazin-6(5*H*)-one**

The product was synthesized according to procedure **A** in 2 mmol scale, afforded as white solid (90 mg, 24% yield), M.P.= 141–143 °C; <sup>1</sup>H NMR (500 MHz, DMSO-*d*<sub>6</sub>) δ 5.42 (dd, *J* = 17.5, 1.6 Hz, 1H), 5.30 (dd, *J* = 17.5, 1.3 Hz, 1H), 5.14 (s, 2H), 4.95 – 4.89 (m, 1H), 2.74 – 2.60 (m, 1H), 1.11 (d, *J* = 7.1 Hz, 3H), 0.50 (d, *J* = 6.9 Hz, 3H); <sup>13</sup>C NMR (126 MHz, DMSO-*d*<sub>6</sub>) δ 160.2, 148.7, 61.5, 47.4, 29.9, 18.3, 15.3; HRMS calcd for C<sub>7</sub>H<sub>13</sub>N<sub>6</sub>O [M+H]<sup>+</sup>: 197.11454; found [M+H]<sup>+</sup>: 197.11462.

**7f: 9-isopropyl-8,9-dihydro-5*H*-tetrazolo[5,1-*d*][1,2,5] triazepin-6(7*H*)-one**

The product was synthesized according to procedure **A** in 2 mmol scale, afforded as white solid (40 mg, 10% yield), M.P.= 147–149 °C; <sup>1</sup>H NMR (500 MHz, DMSO-*d*<sub>6</sub>) δ 9.62 (s, 1H), 6.08 (s, 1H), 5.49 (d, *J* = 14.3 Hz, 1H), 5.07 (d, *J* = 14.3 Hz, 1H), 4.26 (t, *J* = 4.1 Hz, 1H), 2.43 – 2.22 (m, 1H), 1.00 (d, *J* = 6.9 Hz, 3H), 0.93 (d, *J* = 7.0 Hz, 3H); <sup>13</sup>C NMR (126 MHz, DMSO-*d*<sub>6</sub>) δ 169.4, 155.5, 61.9, 51.8, 31.0, 18.5, 18.1; HRMS calcd for C<sub>7</sub>H<sub>13</sub>N<sub>6</sub>O [M+H]<sup>+</sup>: 197.11454; found [M+H]<sup>+</sup>: 197.11462.

**6g: 7-amino-8-cyclopropyl-7,8-dihydro-tetrazolo[1,5-*a*]pyrazin-6(5*H*)-one**

The product was synthesized according to procedure **A** in 2 mmol scale, afforded as semi-solid (90 mg, 23% yield); <sup>1</sup>H NMR (500 MHz, DMSO-*d*<sub>6</sub>) δ 5.41 – 5.22 (m, 2H), 5.13 (s, 2H), 4.60 (dd, *J* = 8.2, 1.6 Hz, 1H), 1.37 – 1.28 (m, 1H), 0.85 – 0.69 (m, 2H), 0.57 – 0.34 (m, 2H); <sup>13</sup>C NMR (126 MHz, DMSO-*d*<sub>6</sub>) δ 159.6, 150.1, 59.4, 47.5, 14.7, 4.9, 1.2; HRMS calcd for C<sub>7</sub>H<sub>11</sub>N<sub>6</sub>O [M+H]<sup>+</sup>: 195.09889; found [M+H]<sup>+</sup>: 195.09900.

**6h: 7-amino-5-benzyl-8,8-dimethyl-7,8-dihydro-tetrazolo [1,5-*a*]pyrazin-6(5*H*)-one**

The product was synthesized according to procedure **A** in 2 mmol scale, afforded as white solid (160 mg, 30% yield), M.P.= 198–200 °C; <sup>1</sup>H NMR (500 MHz, DMSO-*d*<sub>6</sub>) δ 7.22 – 7.11 (m, 3H), 6.71 – 6.65 (m, 2H), 5.80 (dd, *J* = 4.9, 3.0 Hz, 1H), 4.80 (s, 2H), 3.61 (dd, *J* = 14.0, 3.1 Hz, 1H), 3.49 (dd, *J* = 14.0, 4.9 Hz, 1H), 1.56 (s, 3H), 0.66 (s, 3H); <sup>13</sup>C NMR (126 MHz, DMSO-*d*<sub>6</sub>) δ 161.4, 155.0, 133.8, 129.3, 128.6, 127.4, 59.2, 57.1, 38.1, 26.4, 26.2; HRMS calcd for C<sub>13</sub>H<sub>17</sub>N<sub>6</sub>O [M+H]<sup>+</sup>: 273.14584; found [M+H]<sup>+</sup>: 273.14580.

**6i: 7'-amino-5'-benzyl-5'*H*-spiro[cyclohexane-1,8'-tetrazolo [1,5-*a*]pyrazin]-6'(7'*H*)-one**

The product was synthesized according to procedure **A** in 2 mmol scale, afforded as white solid (100 mg, 16% yield), M.P.= 136–138 °C; <sup>1</sup>H NMR (500 MHz, DMSO-*d*<sub>6</sub>) δ 7.21 – 7.04 (m, 3H), 6.73 – 6.59 (m, 2H), 5.82 (dd, *J* = 4.8, 3.1 Hz, 1H), 4.75 (s, 2H), 3.66 – 3.43 (m, 2H), 2.36 – 2.22 (m, 1H), 2.18 – 2.04 (m, 1H), 1.91 – 1.76 (m, 1H), 1.69 – 1.46 (m, 4H), 1.33 – 1.22 (m, 1H), 1.13 – 0.93 (m, 1H); <sup>13</sup>C NMR (126 MHz, DMSO-*d*<sub>6</sub>) δ 162.3, 153.4, 133.8, 129.3, 128.5, 127.3, 60.4, 59.0, 38.2, 32.3, 24.0, 21.0; HRMS calcd for C<sub>16</sub>H<sub>21</sub>N<sub>6</sub>O [M+H]<sup>+</sup>: 313.17714; found [M+H]<sup>+</sup>: 313.17697.

**7i: 5'-benzyl-7',8'-dihydrospiro[cyclohexane-1,9'-tetrazolo [5,1-*d*][1,2,5]triazepin]-6'(5'*H*)-one**

The product was synthesized according to procedure **A** in 2 mmol scale, afforded **7i** as white solid (160 mg, 26% yield), M.P.= 229–231 °C; <sup>1</sup>H NMR (500 MHz, DMSO-*d*<sub>6</sub>)(major isomer) δ 9.88 (s, 1H), 9.70 (s, 1H), 7.45 (d, *J* = 7.5 Hz, 2H), 7.34 – 7.18 (m, 8H), 6.30 (t, *J* = 6.9 Hz, 1H), 6.17 (d, *J* = 15.1 Hz, 2H), 5.31 (d, *J* = 9.8 Hz, 1H), 3.81 – 3.69 (m, 2H), 3.65 (d, *J* = 10.0 Hz, 1H), 3.60 – 3.52 (m, 1H), 2.08 (d, *J* = 11.1 Hz, 1H), 1.98 – 1.77 (m, 7H), 1.75 – 1.53 (m, 11H), 1.42 – 1.33 (m, 2H); <sup>13</sup>C NMR (126 MHz, DMSO-*d*<sub>6</sub>) 126.4, 132.3, 131.6, 72.4, 64.7, 64.2, 64.1, 43.7, 40.2, 39.6, 37.5, 37.3, 37.1, 29.9, 25.5, 25.3, 25.2, 25.0; HRMS calcd for C<sub>16</sub>H<sub>21</sub>N<sub>6</sub>O [M+H]<sup>+</sup>: 313.17714; found [M+H]<sup>+</sup>: 313.17703.

**6j: 7'-amino-5'-benzyl-5'*H*-spiro[cyclopentane-1,8'-tetrazolo[1,5-*a*]pyrazine]-6'(7'*H*)-one**

The product was synthesized according to procedure **A** in 2 mmol scale, afforded as white solid (200 mg, 34% yield), M.P.= 214– 216 °C; <sup>1</sup>H NMR (500 MHz, DMSO-*d*<sub>6</sub>) δ 7.21 – 7.07 (m, 3H), 6.72 – 6.61 (m, 2H), 5.82 (dd, *J* = 5.0, 2.9 Hz, 1H), 4.90 (s, 2H), 3.57 (dd, *J* = 13.9, 3.0 Hz, 1H), 3.44 (dd, *J* = 13.9, 4.9 Hz, 1H), 2.39 – 2.30 (m, 1H), 1.94 – 1.86 (m, 1H), 1.84 – 1.72 (m, 2H), 1.65 – 1.51 (m, 2H), 1.51 – 1.41 (m, 1H), 0.43 – 0.27 (m, 1H); <sup>13</sup>C NMR (126 MHz, DMSO-*d*<sub>6</sub>) δ 162.2, 157.0, 134.2, 129.8, 129.7, 129.0, 127.8, 66.4, 59.5, 38.8, 38.3, 26.3, 26.1; HRMS calcd for C<sub>15</sub>H<sub>19</sub>N<sub>6</sub>O [M+H]<sup>+</sup>: 299.16149; found [M+H]<sup>+</sup>: 299.16132.

**6k: 7-amino-5-benzyl-8-phenethyl-7,8-dihydro-tetrazolo [1,5-*a*]pyrazin-6(5*H*)-one**

The product was synthesized according to procedure **A** in 2 mmol scale, afforded as semi-solid (100 mg, 15% yield); <sup>1</sup>H NMR (500 MHz, DMSO-*d*<sub>6</sub>) δ 7.32 – 7.19 (m, 2H), 7.19 – 7.05 (m, 3H), 7.03 – 6.93 (m, 3H), 6.81 – 6.71 (m, 2H), 5.86 – 5.70 (m, 1H), 5.09 (s, 2H), 4.83 – 4.72 (m, 1H), 3.67 – 3.51 (m, 2H), 2.11 – 2.01 (m, 1H), 2.01 – 1.89 (m, 1H), 1.81 – 1.63 (m, 1H), 0.97 – 0.82 (m, 1H); <sup>13</sup>C NMR (126 MHz, DMSO-*d*<sub>6</sub>) δ 161.7, 150.5, 140.6, 133.9, 129.6, 129.5, 128.6, 128.2, 128.2, 127.5, 125.8, 59.6, 55.3, 37.5, 33.0, 28.7; HRMS calcd for C<sub>19</sub>H<sub>21</sub>N<sub>6</sub>O [M+H]<sup>+</sup>: 349.17714; found [M+H]<sup>+</sup>: 349.17700.

**6l: 7-amino-5-benzyl-8-isopropyl-7,8-dihydro-tetrazolo[1,5-*a*] pyrazin-6(5*H*)-one**

The product was synthesized according to procedure **A** in 2 mmol scale, afforded as a semi-solid (200 mg, 35% yield); <sup>1</sup>H NMR (500 MHz, DMSO-*d*<sub>6</sub>) (major isomer) δ 7.19 – 7.09 (m, 3H), 6.87 – 6.77 (m, 2H), 6.01 – 5.93 (m, 1H), 5.16 (s, 2H), 4.44 (dd, *J* = 3.1, 1.5 Hz, 1H), 3.71 – 3.53 (m, 2H), 2.72 – 2.60 (m, 1H), 1.05 (d, *J* = 7.1 Hz, 3H), 0.41 (d, *J* = 6.8 Hz, 3H); <sup>13</sup>C NMR (126 MHz, DMSO-*d*<sub>6</sub>) (major isomer) δ 162.5, 149.1, 134.3, 129.7, 128.8, 127.7, 61.2,

59.4, 37.6, 30.1, 18.6, 15.4.; HRMS calcd for C<sub>14</sub>H<sub>19</sub>N<sub>6</sub>O [M+H]<sup>+</sup>: 287.16149; found [M+H]<sup>+</sup>: 287.16134.

**6m: 7-amino-5-isopropyl-8,8-dimethyl-7,8-dihydro-tetrazolo [1,5-a]pyrazin-6(5H)-one**

The product was synthesized according to procedure A in 2 mmol scale, afforded as colorless oil (170 mg, 38% yield); <sup>1</sup>H NMR (500 MHz, DMSO-*d*<sub>6</sub>) δ 5.31 (s, 1H), 4.89 (s, 2H), 2.74 – 2.62 (m, 1H), 1.68 (d, *J* = 10.0 Hz, 6H), 1.08 (d, *J* = 7.1 Hz, 3H), 0.78 (d, *J* = 7.0 Hz, 3H); <sup>13</sup>C NMR (126 MHz, DMSO-*d*<sub>6</sub>) δ 162.4, 155.6, 64.1, 57.5, 33.0, 27.9, 27.2, 19.2, 17.3; HRMS calcd for C<sub>9</sub>H<sub>17</sub>N<sub>6</sub>O [M+H]<sup>+</sup>: 225.14584; found [M+H]<sup>+</sup>: 225.14578.

**7n: 5'-isopropyl-7',8'-dihydrospiro[cyclohexane-1,9'-tetrazolo[5,1-d][1,2,5]triazepin]-6'(5'H)-one**

The product was synthesized according to procedure A in 2 mmol scale, afforded **7n** as white solid (210 mg, 40% yield), M.P.= 233–234 °C; <sup>1</sup>H NMR (500 MHz, DMSO-*d*<sub>6</sub>) δ 9.79 (s, 1H), 6.00 (s, 1H), 4.66 (d, *J* = 10.5 Hz, 1H), 3.03 – 2.90 (m, 1H), 2.04 – 1.95 (m, 1H), 1.90 (d, *J* = 13.5 Hz, 1H), 1.72 – 1.53 (m, 7H), 1.42 – 1.28 (m, 1H), 1.07 (d, *J* = 6.7 Hz, 3H), 0.79 (d, *J* = 6.6 Hz, 3H); <sup>13</sup>C NMR (126 MHz, DMSO-*d*<sub>6</sub>) δ 170.6, 160.8, 73.0, 59.4, 35.1, 32.2, 31.5, 25.1, 20.5, 20.4, 20.1, 19.6; HRMS calcd for C<sub>12</sub>H<sub>21</sub>N<sub>6</sub>O [M+H]<sup>+</sup>: 265.17714; found [M+H]<sup>+</sup>: 265.17694.

**6o: 7'-amino-5'-isopropyl-5'H-spiro[cyclopentane-1,8'-tetrazolo[1,5-a] pyrazin]-6'(7'H)-one**

The product was synthesized according to procedure A in 2 mmol scale, afforded as white solid (190 mg, 38% yield), M.P.= 105–107 °C; <sup>1</sup>H NMR (500 MHz, DMSO-*d*<sub>6</sub>) δ 5.33 (d, *J* = 2.7 Hz, 1H), 4.98 (s, 2H), 2.67 – 2.58 (m, 1H), 2.42 – 2.33 (m, 1H), 2.09 – 2.01 (m, 1H), 2.01 – 1.82 (m, 6H), 1.07 (d, *J* = 7.1 Hz, 3H), 0.75 (d, *J* = 6.9 Hz, 3H); <sup>13</sup>C NMR (126 MHz, DMSO-*d*<sub>6</sub>) δ 162.2, 156.9, 66.1, 63.6 (*J* = 4.2 Hz), 38.5, 32.7, 32.7, 26.2, 26.1, 18.8, 16.8; HRMS calcd for C<sub>11</sub>H<sub>19</sub>N<sub>6</sub>O [M+H]<sup>+</sup>: 251.16149; found [M+H]<sup>+</sup>: 251.16142.

**7o: 5'-isopropyl-7',8'-dihydrospiro[cyclopentane-1,9'-tetrazolo[5,1-d][1,2,5]triazepin]-6'(5'H)-one**

The product was synthesized according to procedure A in 2 mmol scale, afforded **7o** as semi-solid (30 mg, 6% yield); <sup>1</sup>H NMR (500 MHz, DMSO-*d*<sub>6</sub>) δ 9.89 (s, 1H), 5.87 (s, 1H), 4.68 (d, *J* = 10.5 Hz, 1H), 3.16 (d, *J* = 5.3 Hz, 1H), 3.01 – 2.87 (m, 1H), 2.30 – 2.18 (m, 1H), 2.17 –

2.07 (m, 1H), 1.87 – 1.67 (m, 5H), 1.06 (d,  $J = 6.8$  Hz, 3H), 0.80 (d,  $J = 6.6$  Hz, 3H);  $^{13}\text{C}$  NMR (126 MHz, DMSO- $d_6$ )  $\delta$  170.3, 161.1, 73.1, 67.6, 38.8, 37.2, 31.5, 24.2, 24.2, 20.1, 19.5; HRMS calcd for  $\text{C}_{11}\text{H}_{19}\text{N}_6\text{O}$   $[\text{M}+\text{H}]^+$ : 251.16149; found  $[\text{M}+\text{H}]^+$ : 251.16147.

**5a: *tert*-butyl 2-(2-(1-(1-methoxy-4-methyl-1-oxopentan-2-yl)-1*H*-tetrazol-5-yl)propan-2-yl)hydrazine-1-carboxylate**

The product was synthesized according to procedure **B** in 1 mmol scale, afforded as semi-solid (270 mg, 73% yield), M.P.= 115–117 °C;  $^1\text{H}$  NMR (500 MHz,  $\text{CDCl}_3$ )  $\delta$  6.00 (d,  $J = 5.5$  Hz, 1H), 5.90 (dd,  $J = 9.9, 5.2$  Hz, 1H), 4.21 (d,  $J = 6.1$  Hz, 1H), 3.78 (s, 3H), 2.51 – 2.38 (m, 1H), 2.27 – 2.16 (m, 1H), 1.70 (s, 3H), 1.55 – 1.59 (m, 1H), 1.54 (s, 3H), 1.42 (s, 9H), 0.97 (d,  $J = 6.6$  Hz, 3H), 0.94 (d,  $J = 6.6$  Hz, 3H);  $^{13}\text{C}$  NMR (126 MHz,  $\text{CDCl}_3$ )  $\delta$  170.3, 165.5, 158.5, 60.4, 57.8, 53.5, 40.1, 28.4, 25.7, 25.1, 24.4, 22.8, 21.9; HRMS calcd for  $\text{C}_{16}\text{H}_{31}\text{N}_6\text{O}_4$   $[\text{M}+\text{H}]^+$ : 371.24019; found  $[\text{M}+\text{H}]^+$ : 371.23999.

**8a: *tert*-butyl(5-isobutyl-8,8-dimethyl-6-oxo-5,6-dihydro-7*H*-spiro [cyclohexane-1,8'-tetrazolo[1,5-*a*]pyrazin-7(8*H*)-yl) carbamate**

The product was synthesized according to procedure **C** in 0.5 mmol scale, afforded as semi-solid (140 mg, 83% yield);  $^1\text{H}$  NMR (500 MHz,  $\text{CDCl}_3$ )  $\delta$  6.46 (s, 1H), 5.28 (s, 1H), 2.20 – 2.08 (m, 1H), 2.05 – 1.91 (m, 2H), 1.79 (s, 6H), 1.49 (s, 9H), 0.96 (s, 6H);  $^{13}\text{C}$  NMR (126 MHz,  $\text{CDCl}_3$ )  $\delta$  164.0, 155.5, 154.4, 83.0, 59.8, 58.2, 43.4, 43.0, 28.1, 24.6, 23.0, 21.6; HRMS calcd for  $\text{C}_{15}\text{H}_{27}\text{N}_6\text{O}_3$   $[\text{M}+\text{H}]^+$ : 339.21392; found  $[\text{M}+\text{H}]^+$ : 339.21374.

**5b: *tert*-butyl 2-(1-(1-(1-methoxy-4-methyl-1-oxopentan-2-yl)-1*H*-tetrazol-5-yl)cyclohexyl)hydrazine-1-carboxylate**

The product was synthesized according to procedure **B** in 1 mmol scale, afforded as white solid (330 mg, 90% yield), M.P.= 112–114 °C;  $^1\text{H}$  NMR (500 MHz,  $\text{CDCl}_3$ )  $\delta$  5.86 (dd,  $J = 9.8, 5.3$  Hz, 1H), 5.82 (d,  $J = 6.5$  Hz, 1H), 4.40 (d,  $J = 6.2$  Hz, 1H), 3.75 (s, 3H), 2.46 – 2.35 (m, 2H), 2.23 – 2.16 (m, 1H), 2.08 – 1.99 (m, 1H), 1.88 – 1.72 (m, 4H), 1.69 – 1.61 (m, 1H), 1.57 – 1.48 (m, 2H), 1.47 – 1.41 (m, 1H), 1.39 (s, 9H), 0.93 (dd,  $J = 11.7, 6.6$  Hz, 6H);  $^{13}\text{C}$  NMR (126 MHz,  $\text{CDCl}_3$ )  $\delta$  170.3, 157.6, 157.1, 80.1, 60.4, 60.2, 53.4, 40.2, 34.4, 32.6, 28.3, 25.3, 25.1, 22.8, 22.3, 22.0, 21.9; HRMS calcd for  $\text{C}_{19}\text{H}_{35}\text{N}_6\text{O}_4$   $[\text{M}+\text{H}]^+$ : 411.27143; found  $[\text{M}+\text{H}]^+$ : 411.27133.

**8b: *tert*-butyl (5'-isobutyl-6'-oxo-5',6'-dihydro-7'*H*-spiro [cyclohexane-1,8'-tetrazolo[1,5-*a*]pyrazin]-7'-yl) carbamate**

The product was synthesized according to procedure **C** in 0.5 mmol scale, afforded as white solid (150 mg, 78% yield), M.P.= 150–152 °C; <sup>1</sup>H NMR (500 MHz, CDCl<sub>3</sub>) (major rotamer) δ 6.42 (s, 1H), 5.38 – 5.16 (m, 1H), 2.61 – 2.40 (m, 1H), 2.36 – 2.19 (m, 1H), 2.18 – 1.89 (m, 6H), 1.89 – 1.77 (m, 2H), 1.75 – 1.67 (m, 2H), 1.49 (s, 9H), 1.32 – 1.22 (m, 1H), 1.00 – 0.90 (m, 6H); <sup>13</sup>C NMR (126 MHz, CDCl<sub>3</sub>) δ 155.9, 153.0, 83.0, 63.4, 57.8, 43.4, 36.1, 35.0, 34.2, 33.3, 28.2, 24.5, 24.4, 23.0, 21.8; HRMS calcd for C<sub>18</sub>H<sub>31</sub>N<sub>6</sub>O<sub>3</sub> [M+H]<sup>+</sup>: 379.24522; found [M+H]<sup>+</sup>: 379.24522.

**5c: tert-butyl 2-(1-(1-(1-methoxy-4-methyl-1-oxopentan-2-yl)-1H-tetrazol-5-yl)cyclopentyl) hydrazine-1-carboxylate**

The product was synthesized according to procedure **B** in 1 mmol scale, afforded as colorless oil (230 mg, 58% yield); <sup>1</sup>H NMR (500 MHz, CDCl<sub>3</sub>) δ 5.83 (d, *J* = 6.6 Hz, 1H), 5.66 (dd, *J* = 10.4, 4.7 Hz, 1H), 4.32 (d, *J* = 6.7 Hz, 1H), 3.77 (s, 3H), 2.58 – 2.45 (m, 2H), 2.25 – 2.10 (m, 2H), 2.04 – 1.88 (m, 4H), 1.88 – 1.81 (m, 1H), 1.80 – 1.71 (m, 1H), 1.59 – 1.47 (m, 1H), 1.40 (s, 9H), 0.95 (dd, *J* = 7.9, 6.6 Hz, 6H); <sup>13</sup>C NMR (126 MHz, CDCl<sub>3</sub>) δ 170.4, 158.5, 157.4, 81.0, 67.9, 60.0, 53.3, 39.7, 36.1, 33.8, 28.2, 24.9, 24.4, 23.6, 22.8, 21.6; HRMS calcd for C<sub>18</sub>H<sub>33</sub>N<sub>6</sub>O<sub>4</sub> [M+H]<sup>+</sup>: 397.25578; found [M+H]<sup>+</sup>: 397.25516.

**8c: tert-butyl (5'-isobutyl-6'-oxo-5',6'-dihydro-7'-H-spiro [cyclopentane-1,8'-tetrazolo[1,5-a]pyrazin]-7'-yl) carbamate**

The product was synthesized according to procedure **C** in 0.5 mmol scale, afforded as white solid (140 mg, 77% yield), M.P.= 134–136 °C; <sup>1</sup>H NMR (500 MHz, CDCl<sub>3</sub>) (major rotamer) δ 6.46 (d, *J* = 12.4 Hz, 1H), 5.37 – 5.20 (m, 1H), 2.61 – 2.45 (m, 1H), 2.44 – 2.27 (m, 2H), 2.23 – 1.92 (m, 8H), 1.49 (s, 9H), 0.95 (dd, *J* = 16.6, 6.9 Hz, 6H); <sup>13</sup>C NMR (126 MHz, CDCl<sub>3</sub>) δ 164.4, 155.9, 155.6, 83.0, 68.6, 58.1, 42.9, 40.3, 39.3, 38.2, 37.3, 28.1, 25.5, 24.4, 23.0, 21.5; HRMS calcd for C<sub>17</sub>H<sub>29</sub>N<sub>6</sub>O<sub>3</sub> [M+H]<sup>+</sup>: 365.22957; found [M+H]<sup>+</sup>: 365.22952.

**5d: tert-butyl 2-(1-(1-(2-methoxy-2-oxoethyl)-1H-tetrazol-5-yl)cyclohexyl)hydrazine-1-carboxylate**

The product was synthesized according to procedure **B** in 1 mmol scale, afforded as colorless oil (76%, 0.27g); <sup>1</sup>H NMR (500 MHz, CDCl<sub>3</sub>) δ 5.95 (d, *J* = 5.2 Hz, 1H), 5.55 (s, 2H), 4.36 – 4.23 (m, 1H), 3.81 (s, 3H), 2.24 – 2.15 (m, 2H), 1.85 – 1.74 (m, 2H), 1.73 – 1.67 (m, 2H), 1.65 – 1.57 (m, 2H), 1.54 – 1.42 (m, 2H), 1.37 (s, 9H); <sup>13</sup>C NMR (126 MHz, CDCl<sub>3</sub>) δ 167.8, 157.4,

156.9, 81.0, 59.7, 53.3, 50.0, 33.3, 28.3, 25.2, 22.0; HRMS calcd for C<sub>15</sub>H<sub>27</sub>N<sub>6</sub>O<sub>4</sub> [M+H]<sup>+</sup>: 355.20883; found [M+H]<sup>+</sup>: 355.20875.

**8d: tert-butyl(6'-oxo-5',6'-dihydro-7'-H-spiro [cyclohexane-1,8'-tetrazolo[1,5-a]pyrazin]-7'-yl) carbamate**

The product was synthesized according to procedure **C** in 0.5 mmol scale, afforded as white solid (60 mg, 38% yield), M.P.= 123–125 °C; <sup>1</sup>H NMR (500 MHz, CDCl<sub>3</sub>) δ 6.36 (s, 1H), 5.28 (d, *J* = 18.2 Hz, 1H), 5.16 (d, *J* = 18.1 Hz, 1H), 2.37 – 2.24 (m, 1H), 2.20 – 2.09 (m, 3H), 2.03 (d, *J* = 7.7 Hz, 1H), 1.91 – 1.81 (m, 1H), 1.82 – 1.68 (m, 3H), 1.50 (s, 9H), 1.33 – 1.23 (m, 1H); <sup>13</sup>C NMR (126 MHz, CDCl<sub>3</sub>) δ 161.2, 155.7, 153.6, 83.0, 63.6, 47.7, 34.7, 33.7, 28.1, 24.3, 21.8, 21.7; HRMS calcd for C<sub>14</sub>H<sub>23</sub>N<sub>6</sub>O<sub>3</sub> [M+H]<sup>+</sup>: 323.18262; found [M+H]<sup>+</sup>: 323.18259.

**5e: tert-butyl 2-(2-(1-(1-methoxy-1-oxo-3-phenylpropan-2-yl) -1H-tetrazol-5-yl)propan-2-yl)hydrazine-1-carboxylate**

The product was synthesized according to procedure **B** in 1 mmol scale, afforded as colorless oil (250 mg, 63% yield); <sup>1</sup>H NMR (500 MHz, CDCl<sub>3</sub>) δ 7.25 – 7.15 (m, 3H), 7.06 – 6.98 (m, 2H), 6.35 – 6.31 (m, 1H), 4.75 (d, *J* = 6.1 Hz, 1H), 3.90 (d, *J* = 6.2 Hz, 1H), 3.83 (s, 3H), 3.82 – 3.78 (m, 1H), 3.73 – 3.69 (m, 1H), 1.43 (s, 3H), 1.38 (s, 9H), 1.15 (s, 3H); <sup>13</sup>C NMR (126 MHz, CDCl<sub>3</sub>) δ 168.8, 158.9, 157.4, 136.0, 129.5, 129.1, 127.9, 80.9, 63.3, 57.8, 53.7, 37.5, 28.3, 25.1, 24.5; HRMS calcd for C<sub>19</sub>H<sub>29</sub>N<sub>6</sub>O<sub>4</sub> [M+H]<sup>+</sup>: 405.22448; found [M+H]<sup>+</sup>: 405.22415.

**8e: tert-butyl (5-benzyl-8,8-dimethyl-6-oxo-5,6-dihydro-1,5-a) pyrazin-7(8H)-yl) carbamate**

The product was synthesized according to procedure **C** in 0.5 mmol scale, afforded as colorless oil (150 mg, 83% yield); <sup>1</sup>H NMR (500 MHz, CDCl<sub>3</sub>) δ 7.20 – 7.06 (m, 3H), 6.70 (s, 2H), 6.31 – 6.12 (m, 1H), 5.63 (s, 1H), 3.79 – 3.63 (m, 2H), 1.67 (s, 3H), 0.63 (s, 3H); <sup>13</sup>C NMR (126 MHz, CDCl<sub>3</sub>) δ 162.7, 155.4, 155.1, 133.1, 129.8, 129.1, 128.1, 83.0, 60.2, 59.8, 38.9, 28.1, 27.1, 26.8; HRMS calcd for C<sub>18</sub>H<sub>25</sub>N<sub>6</sub>O<sub>3</sub> [M+H]<sup>+</sup>: 373.19827; found [M+H]<sup>+</sup>: 373.19826.

**5f: tert-butyl 2-(1-(1-(1-methoxy-1-oxo-3-phenylpropan-2-yl)-1H-tetrazol-5-yl)cyclopentyl)hydrazine-1-carboxylate**

The product was synthesized according to procedure **B** in 1 mmol scale, afforded as colorless oil (240 mg, 56%); <sup>1</sup>H NMR (500 MHz, CDCl<sub>3</sub>) δ 7.23 – 7.15 (m, 3H), 7.09 – 7.00 (m, 2H), 6.15 (dd, *J* = 12.0, 3.6 Hz, 1H), 4.69 – 4.57 (m, 1H), 4.08 (d, *J* = 6.4 Hz, 1H), 3.83 (s, 3H), 3.71 (dd, *J* = 14.1, 3.6 Hz, 1H), 2.13 – 2.05 (m, 1H), 1.90 – 1.83 (m, 1H), 1.82 – 1.63 (m, 5H), 1.60



– 1.52 (m, 1H), 1.47 – 1.40 (m, 1H), 1.38 (s, 9H); <sup>13</sup>C NMR (126 MHz, CDCl<sub>3</sub>) δ 168.8, 158.8, 157.6, 136.0, 129.5, 129.0, 127.8, 80.9, 68.1, 63.0, 53.6, 37.3, 35.1, 34.5, 28.3, 23.8, 23.8; HRMS calcd for C<sub>22</sub>H<sub>33</sub>N<sub>6</sub>O<sub>4</sub> [M+H]<sup>+</sup>: 431.24013; found [M+H]<sup>+</sup>: 431.23991.

**8f: tert-butyl (5'-benzyl-6'-oxo-5',6'-dihydro-7'H-spiro[cyclopentane-1,8'-tetrazolo[1,5-a]pyrazin]-7'-yl)carbamate**

The product was synthesized according to procedure C in 0.5 mmol scale, afforded as semi-solid (150 mg, 74%); <sup>1</sup>H NMR (500 MHz, CDCl<sub>3</sub>) δ 7.22 – 7.10 (m, 3H), 6.67 (d, *J* = 7.1 Hz, 2H), 6.19 (s, 1H), 5.65 (s, 1H), 3.72 (dd, *J* = 14.2, 3.0 Hz, 1H), 3.65 (dd, *J* = 14.0, 4.7 Hz, 1H), 2.36 – 2.32 (m, 1H), 2.20 – 2.13 (m, 1H), 2.04 – 1.95 (m, 1H), 1.80 – 1.71 (m, 2H), 1.66 – 1.61 (m, 1H), 1.5 (s, 9H), 1.07 – 1.03 (m, 1H), 0.57 – 0.53 (m, 1H); <sup>13</sup>C NMR (126 MHz, CDCl<sub>3</sub>) δ 163.1, 156.5, 155.7, 133.2, 129.8, 129.1, 128.2, 83.2, 68.5, 60.1, 39.1, 39.0, 38.0, 28.1, 25.7, 25.4; HRMS calcd for C<sub>20</sub>H<sub>27</sub>N<sub>6</sub>O<sub>3</sub> [M+H]<sup>+</sup>: 399.21392; found [M+H]<sup>+</sup>: 399.21372.

**5g: tert-butyl 2-(2-(1-(1-methoxy-3-methyl-1-oxobutan-2-yl)-1H-tetrazol-5-yl)propan-2-yl)hydrazine-1-carboxylate**

The product was synthesized according to procedure B in 1 mmol scale, afforded as white solid (270 mg, 76% yield), M.P. = 110–112 °C; <sup>1</sup>H NMR (500 MHz, CDCl<sub>3</sub>) δ 6.06 (d, *J* = 5.4 Hz, 1H), 5.73 (d, *J* = 8.3 Hz, 1H), 4.24 – 4.14 (m, 1H), 3.78 (s, 3H), 2.96 – 2.88 (m, 1H), 1.66 (s, 3H), 1.55 (s, 3H), 1.42 (s, 9H), 1.13 (d, *J* = 6.7 Hz, 3H), 0.99 (d, *J* = 6.7 Hz, 3H); <sup>13</sup>C NMR (126 MHz, CDCl<sub>3</sub>) δ 169.1, 158.7, 157.3, 81.2, 67.1, 57.9, 53.2, 31.0, 28.3, 25.9, 24.8, 19.8, 19.7; HRMS calcd for C<sub>15</sub>H<sub>29</sub>N<sub>6</sub>O<sub>4</sub> [M+H]<sup>+</sup>: 357.22448; found [M+H]<sup>+</sup>: 357.22435.

**8g: tert-butyl (5-isopropyl-8,8-dimethyl-6-oxo-5,6-dihydro-tetrazolo[1,5-a]pyrazin-7(8H)-yl)carbamate**

The product was synthesized according to procedure C in 0.5 mmol scale, afforded as white solid (140 mg, 87% yield), M.P. = 75–77 °C; <sup>1</sup>H NMR (500 MHz, CDCl<sub>3</sub>) δ 6.45 (s, 1H), 5.15 (s, 1H), 2.94 – 2.78 (m, 1H), 1.82 (s, 6H), 1.49 (s, 9H), 1.22 (d, *J* = 7.0 Hz, 3H), 1.00 (d, *J* = 6.6 Hz, 3H); <sup>13</sup>C NMR (126 MHz, CDCl<sub>3</sub>) δ 163.0, 155.5, 154.9, 82.9, 64.7, 59.7, 34.2, 28.0, 27.6, 19.0, 17.2; HRMS calcd for C<sub>14</sub>H<sub>25</sub>N<sub>6</sub>O<sub>3</sub> [M+H]<sup>+</sup>: 325.19827; found [M+H]<sup>+</sup>: 325.19815.

**5h: tert-butyl 2-(1-(1-(1-methoxy-3-methyl-1-oxobutan-2-yl)-1H-tetrazol-5-yl)cyclohexyl)hydrazine-1-carboxylate**

The product was synthesized according to procedure B in 1 mmol scale, afforded as semi-solid (220 mg, 56% yield); <sup>1</sup>H NMR (500 MHz, CDCl<sub>3</sub>) δ 5.86 (d, *J* = 5.9 Hz, 1H), 5.73 (d, *J* = 8.0

Hz, 1H), 4.39 (s, 1H), 3.78 (s, 3H), 2.98 – 2.86 (m, 1H), 2.45 – 2.32 (m, 1H), 2.16 – 2.06 (m, 1H), 1.88 – 1.66 (m, 5H), 1.57 – 1.49 (m, 1H), 1.46 (t,  $J = 4.8$  Hz, 2H), 1.42 (s, 9H), 1.14 (dd,  $J = 6.8, 2.2$  Hz, 3H), 1.02 (dd,  $J = 6.9, 1.9$  Hz, 3H);  $^{13}\text{C}$  NMR (126 MHz,  $\text{CDCl}_3$ )  $\delta$  169.2, 157.2, 157.1, 81.1, 66.9, 60.2, 53.2, 33.0, 31.1, 28.3, 25.3, 22.2, 22.0, 19.9, 19.7; HRMS calcd for  $\text{C}_{18}\text{H}_{33}\text{N}_6\text{O}_4$   $[\text{M}+\text{H}]^+$ : 397.25578; found  $[\text{M}+\text{H}]^+$ : 397.25568.

**8h: *tert*-butyl (5'-isopropyl-6'-oxo-5',6'-dihydro-7'*H*-spiro [cyclohexane-1,8'-tetrazolo[1,5-*a*]pyrazin]-7'-yl) carbamate**

The product was synthesized according to procedure **C** in 0.5 mmol scale, afforded as white solid (150 mg, 81% yield), M.P.= 185–186 °C;  $^1\text{H}$  NMR (500 MHz,  $\text{CDCl}_3$ )(major rotamer)  $\delta$  6.33 (s, 1H), 5.10 (s, 1H), 2.88 – 2.73 (m, 1H), 2.57 – 2.34 (m, 1H), 2.29 – 2.04 (m, 3H), 2.00 – 1.83 (m, 2H), 1.80 – 1.68 (m, 2H), 1.60 – 1.54 (m, 1H), 1.47 (s, 9H), 1.33 – 1.23 (m, 1H), 1.18 (d,  $J = 8.1$  Hz, 3H), 0.95 (d,  $J = 6.9$  Hz, 3H);  $^{13}\text{C}$  NMR (126 MHz,  $\text{CDCl}_3$ )  $\delta$  163.7, 155.9, 153.4, 82.9, 64.5, 63.3, 35.8, 34.8, 34.4, 34.0, 28.2, 24.4, 21.6, 19.1, 17.4; HRMS calcd for  $\text{C}_{17}\text{H}_{29}\text{N}_6\text{O}_3$   $[\text{M}+\text{H}]^+$ : 365.22957; found  $[\text{M}+\text{H}]^+$ : 365.22940.

**5i: *tert*-butyl 2-(1-(1-(1-methoxy-3-methyl-1-oxobutan-2-yl)-1*H*-tetrazol-5-yl)cyclopentyl) hydrazine-1-carboxylate**

The product was synthesized according to procedure **B** in 1 mmol scale, afforded as white solid (280 mg, 73% yield), M.P.= 100–102 °C;  $^1\text{H}$  NMR (500 MHz,  $\text{CDCl}_3$ )  $\delta$  5.84 (d,  $J = 5.8$  Hz, 1H), 5.53 (d,  $J = 7.9$  Hz, 1H), 4.38 – 4.21 (m, 1H), 3.77 (s, 3H), 2.98 – 2.84 (m,  $J = 6.8$  Hz, 1H), 2.46 – 2.36 (m, 1H), 2.22 – 2.14 (m, 1H), 2.05 – 1.99 (m, 2H), 1.98 – 1.87 (m, 2H), 1.86 – 1.73 (m, 2H), 1.40 (s, 9H), 1.11 (d,  $J = 6.8$  Hz, 3H), 1.04 (d,  $J = 6.8$  Hz, 3H);  $^{13}\text{C}$  NMR (126 MHz,  $\text{CDCl}_3$ )  $\delta$  169.3, 158.7, 157.4, 81.2, 68.0, 66.9, 53.2, 36.2, 34.4, 30.9, 28.3, 23.7, 24.4, 19.9, 19.6; HRMS calcd for  $\text{C}_{17}\text{H}_{31}\text{N}_6\text{O}_4$   $[\text{M}+\text{H}]^+$ : 383.24013; found  $[\text{M}+\text{H}]^+$ : 383.24019.

**8i: *tert*-butyl (5'-isopropyl-6'-oxo-5',6'-dihydro-7'*H*-spiro [cyclopentane-1,8'-tetrazolo[1,5-*a*]pyrazin]-7'-yl) carbamate**

The product was synthesized according to procedure **C** in 0.5 mmol scale, afforded as white solid (150 mg, 87% yield), M.P.= 146–147 °C;  $^1\text{H}$  NMR (500 MHz,  $\text{CDCl}_3$ )(major rotamer)  $\delta$  6.41 (s, 1H), 5.16 (d,  $J = 49.8$  Hz, 1H), 2.84 – 2.67 (m, 1H), 2.61 – 2.46 (m, 1H), 2.34 – 2.24 (m, 1H), 2.19 – 2.05 (m, 3H), 2.01 – 1.90 (m, 2H), 1.51 (s, 9H), 1.18 (s, 3H), 0.95 (s, 3H), 0.88 – 0.79 (m, 1H);  $^{13}\text{C}$  NMR (126 MHz,  $\text{CDCl}_3$ )  $\delta$  163.3, 156.5, 155.8, 83.0, 68.6, 64.7, 40.9, 39.4,

38.3, 34.2, 28.2, 25.8, 19.1, 17.2; HRMS calcd for C<sub>16</sub>H<sub>27</sub>N<sub>6</sub>O<sub>3</sub> [M+H]<sup>+</sup>: 351.21392; found [M+H]<sup>+</sup>: 351.21375.

**5j: benzyl 4-(2-(tert-butoxycarbonyl)hydrazineyl)-4-(1-(1-methoxy-4-methyl-1-oxopentan-2-yl)-1H-tetrazol-5-yl) piperidine-1-carboxylate**

The product was synthesized according to procedure **B** in 1 mmol scale, afforded as white solid (440 mg, 81% yield), M.P.= 78–80 °C; <sup>1</sup>H NMR (500 MHz, CDCl<sub>3</sub>) δ 7.40 – 7.29 (m, 5H), 5.98 – 5.76 (m, 2H), 5.12 (d, *J* = 3.5 Hz, 2H), 4.39 (s, 1H), 4.05 – 3.95 (m, 1H), 3.96 – 3.86 (m, 1H), 3.79 (s, 3H), 3.71 – 3.41 (m, 1H), 3.31 – 3.06 (m, 1H), 2.55 – 2.36 (m, 2H), 2.29 – 2.17 (m, 1H), 2.15 – 2.02 (m, 1H), 2.01 – 1.92 (m, 1H), 1.91 – 1.82 (m, 1H), 1.57 – 1.46 (m, 1H), 1.41 (s, 9H), 0.94 (dd, *J* = 11.2, 6.6 Hz, 6H); <sup>13</sup>C NMR (126 MHz, CDCl<sub>3</sub>) δ 170.0, 157.3, 156.4, 155.2, 136.7, 128.7, 128.2, 128.1, 81.5, 67.4, 60.5, 59.1, 53.6, 40.9, 40.1, 33.6, 32.4, 28.3, 25.1, 24.7, 22.8, 21.9; HRMS calcd for C<sub>26</sub>H<sub>40</sub>N<sub>7</sub>O<sub>6</sub> [M+H]<sup>+</sup>: 546.30346; found [M+H]<sup>+</sup>: 546.30341.

**8j: benzyl 7'-((tert-butoxycarbonyl)amino)-5'-isobutyl-6'-oxo-6',7'-dihydro-5'H-spiro [piperidine-4,8'-tetrazolo [1,5-a]pyrazine]-1-carboxylate**

The product was synthesized according to procedure **C** in 0.5 mmol scale, afforded as white solid (200 mg, 79% yield), M.P.= 172–173 °C; <sup>1</sup>H NMR (500 MHz, CDCl<sub>3</sub>)(major rotamer) δ 7.41 – 7.30 (m, 5H), 6.37 (s, 1H), 5.38 – 5.25 (m, 1H), 5.17 (d, *J* = 3.4 Hz, 2H), 4.34 – 4.12 (m, 2H), 4.12 – 3.92 (m, 1H), 3.66 – 3.40 (m, 1H), 2.53 – 2.24 (m, 2H), 2.18 – 2.08 (m, 1H), 2.04 – 1.92 (m, 2H), 1.91 (s, 9H), 1.68 – 1.57 (m, 2H), 0.97 (s, 6H); <sup>13</sup>C NMR (126 MHz, CDCl<sub>3</sub>) δ 164.2, 155.4, 155.2, 151.9, 136.5, 128.6, 128.2, 127.9, 83.3, 67.4, 61.2, 57.8, 43.5, 43.2, 39.9, 39.6, 33.5, 28.0, 24.4, 22.9, 21.4; HRMS calcd for C<sub>25</sub>H<sub>36</sub>N<sub>7</sub>O<sub>5</sub> [M+H]<sup>+</sup>: 514.27724; found [M+H]<sup>+</sup>: 514.27716.

**5k: tert-butyl 2-(1-(1-(1-methoxy-2-methyl-1-oxopropan-2-yl)-1H-tetrazol-5-yl) cyclohexyl)hydrazine-1-carboxylate**

The product was synthesized according to procedure **B** in 1 mmol scale, afforded as a white solid (220 mg, 57% yield), M.P.= 157–159 °C; <sup>1</sup>H NMR (500 MHz, CDCl<sub>3</sub>) δ 5.85 (d, *J* = 7.3 Hz, 1H), 4.56 (d, *J* = 5.7 Hz, 1H), 3.73 (s, 3H), 2.12 – 2.08 (m, 1H), 2.05 (s, 6H), 2.01 – 1.95 (m, 2H), 1.91 – 1.88 (m, 1H), 1.71 – 1.59 (m, 5H), 1.52 – 1.48 (m, 1H), 1.43 (s, 9H); <sup>13</sup>C NMR (126 MHz, CDCl<sub>3</sub>) δ 173.2, 159.7, 156.7, 81.1, 66.2, 60.6, 53.2, 34.1, 28.4, 27.0, 25.1, 24.4, 21.3; HRMS calcd for C<sub>17</sub>H<sub>31</sub>N<sub>6</sub>O<sub>4</sub> [M+H]<sup>+</sup>: 383.24013; found [M+H]<sup>+</sup>: 383.24036.

**8k: tert-butyl (5',5'-dimethyl-6'-oxo-5',6'-dihydro-7'H-spiro [cyclohexane-1,8'-tetrazolo[1,5-a] pyrazin]-7'-yl) carbamate**

The product was synthesized according to procedure **C** in 0.5 mmol scale, afforded as white solid (140 mg, 80% yield), M.P.= 166–167 °C; <sup>1</sup>H NMR (500 MHz, CDCl<sub>3</sub>) δ 6.31 (s, 1H), 2.39 – 2.06 (m, 4H), 1.94 (s, 1H), 1.90 (s, 6H), 1.88 – 1.83 (m, 1H), 1.79 – 1.70 (m, 2H), 1.67 – 1.59 (m, 1H), 1.50 (s, 9H), 1.32 – 1.22 (m, 1H); <sup>13</sup>C NMR (126 MHz, CDCl<sub>3</sub>) δ 167.8, 155.7, 151.7, 82.8, 63.1, 62.2, 35.1, 34.1, 28.3, 26.9, 24.34, 21.7, 21.6; HRMS calcd for C<sub>16</sub>H<sub>27</sub>N<sub>6</sub>O<sub>3</sub> [M+H]<sup>+</sup>: 351.21392; found [M+H]<sup>+</sup>: 351.21381.

**5l: tert-butyl 2-(2-(1-(3-(1H-indol-3-yl)-1-methoxy-1-oxopropan-2-yl)-1H-tetrazol-5-yl) propan-2-yl) hydrazine-1-carboxylate**

The product was synthesized according to procedure **B** in 1 mmol scale, afforded as colorless oil (360 mg, 82% yield); <sup>1</sup>H NMR (500 MHz, CDCl<sub>3</sub>) δ 8.48 (s, 1H), 7.58 (d, *J* = 7.8 Hz, 1H), 7.31 (d, *J* = 6.9 Hz, 1H), 7.18 – 7.08 (m, 2H), 6.69 (d, *J* = 2.5 Hz, 1H), 6.48 (dd, *J* = 11.0, 4.6 Hz, 1H), 4.57 (d, *J* = 5.7 Hz, 1H), 3.96 – 3.88 (m, 2H), 3.85 (s, 3H), 3.76 (d, *J* = 5.7 Hz, 1H), 1.36 (s, 3H), 1.32 (s, 9H), 1.02 (s, 3H); <sup>13</sup>C NMR (126 MHz, CDCl<sub>3</sub>) δ 169.1, 159.0, 157.4, 135.9, 126.2, 124.1, 122.6, 120.1, 117.9, 111.9, 109.2, 80.7, 62.1, 57.6, 53.5, 28.2, 27.6, 25.1, 24.3; HRMS calcd for C<sub>21</sub>H<sub>30</sub>N<sub>7</sub>O<sub>4</sub> [M+H]<sup>+</sup>: 444.23538; found [M+H]<sup>+</sup>: 444.23529.

**8l: tert-butyl (5-((1H-indol-3-yl)methyl)-8,8-dimethyl-6-oxo-5,6-dihydro-1,5-a pyrazine-7(8H)-yl)carbamate**

The product was synthesized according to procedure **C** in 0.5 mmol scale, afforded as semi-solid (140 mg, 69% yield); <sup>1</sup>H NMR (500 MHz, CDCl<sub>3</sub>)(major rotamer) δ 8.08 (s, 1H), 7.34 (s, 1H), 7.29 (s, 1H), 7.14 (t, *J* = 7.5 Hz, 1H), 7.09 (t, *J* = 7.6 Hz, 1H), 6.43 (s, 1H), 5.69 (s, 2H), 3.98 (d, *J* = 15.0 Hz, 1H), 3.85 – 3.75 (m, 1H), 1.60 (s, 3H), 1.50 (s, 9H), 0.35 (s, 3H); <sup>13</sup>C NMR (126 MHz, CDCl<sub>3</sub>) δ 163.4, 156.8, 155.3, 135.7, 126.8, 124.3, 123.9, 122.7, 120.2, 118.5, 111.4, 82.8, 61.0, 59.6, 29.7, 28.0, 26.9, 26.2; HRMS calcd for C<sub>20</sub>H<sub>26</sub>N<sub>7</sub>O<sub>3</sub> [M+H]<sup>+</sup>: 412.20916; found [M+H]<sup>+</sup>: 412.20911.

**9a: 7'-amino-5'-isobutyl-5'H-spiro[cyclopentane-1,8'-tetrazolo[1,5-a]pyrazin]-6'(7'H)-one hydrochloride**

The product was synthesized according to procedure **D** in 0.3 mmol scale, afforded as white solid (80 mg, 89% yield), M.P= 159-161 °C; <sup>1</sup>H NMR (500 MHz, DMSO-*d*<sub>6</sub>) δ 5.44 (dd, *J* = 6.8, 4.8 Hz, 1H), 2.53 – 2.46 (m, 1H), 2.42 – 2.35 (m, 1H), 2.10 – 1.82 (m, 8H), 1.76 – 1.66 (m, 1H), 0.85 (d, *J* = 6.6 Hz, 3H), 0.79 (d, *J* = 6.6 Hz, 3H); <sup>13</sup>C NMR (126 MHz, DMSO-*d*<sub>6</sub>) δ 163.2,

156.1, 66.2, 57.3, 41.7, 38.7, 37.6, 25.8, 24.1, 22.9, 21.7, 21.2. HRMS calcd for C<sub>12</sub>H<sub>21</sub>N<sub>6</sub>O [M+H]<sup>+</sup>: 265.17714; found [M+H]<sup>+</sup>: 265.17703.

**9b: 7'-amino-5'-benzyl-5'-H-spiro[cyclopentane-1,8'-tetrazolo[1,5-a]pyrazin]-6'(7'H)-one hydrochloride**

The product was synthesized according to procedure **D** in 0.3 mmol scale, afforded as white solid (90 mg, 89% yield), M.P.= 165–167 °C; <sup>1</sup>H NMR (500 MHz, DMSO-*d*<sub>6</sub>) δ 7.19 – 7.07 (m, 3H), 6.70 – 6.59 (m, 2H), 5.81 (dd, *J* = 4.9, 2.9 Hz, 1H), 3.61 – 3.36 (m, 2H), 2.41 – 2.30 (m, 1H), 1.96 – 1.83 (m, 1H), 1.83 – 1.68 (m, 2H), 1.65 – 1.42 (m, 3H), 0.40 – 0.29 (m, 1H); <sup>13</sup>C NMR (126 MHz, DMSO-*d*<sub>6</sub>) 161.8, 156.6, 133.8, 129.3, 128.6, 127.4, 66.0, 59.1, 38.4, 37.9, 25.9, 25.6; HRMS calcd for C<sub>15</sub>H<sub>19</sub>N<sub>6</sub>O [M+H]<sup>+</sup>: 299,16149; found [M+H]<sup>+</sup>: 299,16129.

**9c: 7'-amino-5'-isopropyl-5'-H-spiro[cyclopentane-1,8'-tetrazolo[1,5-a]pyrazin]-6'(7'H)-one hydrochloride**

The product was synthesized according to procedure **D** in 0.3 mmol scale, afforded as white solid (80 mg, 93% yield), M.P.= 166–168 °C; <sup>1</sup>H NMR (500 MHz, DMSO-*d*<sub>6</sub>) δ 5.33 (d, *J* = 2.6 Hz, 1H), 2.67 – 2.56 (m, 1H), 2.43 – 2.34 (m, 1H), 2.10 – 2.01 (m, 1H), 1.99 – 1.82 (m, 6H), 1.06 (d, *J* = 7.0 Hz, 3H), 0.74 (d, *J* = 7.0 Hz, 3H); <sup>13</sup>C NMR (126 MHz, DMSO-*d*<sub>6</sub>) δ 162.2, 156.9, 66.1, 63.6, 32.8, 26.1, 26.0, 18.8, 16.8; HRMS calcd for C<sub>11</sub>H<sub>19</sub>N<sub>6</sub>O [M+H]<sup>+</sup>: 251.16149; found [M+H]<sup>+</sup>: 251.16138

**9d: 7'-amino-5',5'-dimethyl-5'-H-spiro[cyclohexane-1,8'-tetrazolo[1,5-a]pyrazin]-6'(7'H)-one hydrochloride**

The product was synthesized according to procedure **D** in 0.3 mmol scale, afforded as white solid (80 mg, 93% yield), M.P.= 160–162 °C; <sup>1</sup>H NMR (500 MHz, DMSO-*d*<sub>6</sub>) δ 2.48 – 2.39 (m, 2H), 2.13 – 2.01 (m, 2H), 1.77 (s, 6H), 1.74– 1.63 (m, 5H), 1.28 – 1.16 (m, 1H); <sup>13</sup>C NMR (126 MHz, DMSO-*d*<sub>6</sub>) 166.8, 152.0, 61.2, 60.7, 32.9, 27.4, 24.0, 21.3; HRMS calcd for C<sub>11</sub>H<sub>19</sub>N<sub>6</sub>O [M+H]<sup>+</sup>: 251,16149; found [M+H]<sup>+</sup>: 251,16129.

**10: N-(5-isobutyl-8,8-dimethyl-6-oxo-5,6-dihydrotetrazolo [1,5-a] pyrazine-7(8H)-yl) acrylamide**

The product was obtained as colorless oil (230 mg, 78% yield); <sup>1</sup>H NMR (500 MHz, CDCl<sub>3</sub>) δ 8.12 (s, 1H), 6.49 (dd, *J* = 17.1, 1.2 Hz, 1H), 6.31 (dd, *J* = 17.0, 10.4 Hz, 1H), 5.86 (dd, *J* = 10.3, 1.3 Hz, 1H), 5.26 (dd, *J* = 7.9, 5.0 Hz, 1H), 2.16 – 2.08 (m, 1H), 2.04 – 1.98 (m, 1H), 1.97

– 1.90 (m, 1H), 1.82 (s, 3H), 1.71 (s, 3H), 0.96 (d,  $J = 6.5$  Hz, 6H);  $^{13}\text{C}$  NMR (126 MHz,  $\text{CDCl}_3$ )  $\delta$  166.1, 163.6, 154.2, 130.6, 127.4, 60.1, 58.5, 43.3, 28.3, 26.6, 24.6, 23.0, 21.5; HRMS calcd for  $\text{C}_{13}\text{H}_{21}\text{N}_6\text{O}_2$   $[\text{M}+\text{H}]^+$ : 293.17205; found  $[\text{M}+\text{H}]^+$ : 293.17191.

**11: 2-(4-chlorophenyl)-N-(5-isobutyl-8,8-dimethyl-6-oxo-5,6-dihydro-1,5-a)pyrazin-7(8H)-yl)acetamide**

The product was obtained as semi-solid (290 mg, 75% yield);  $^1\text{H}$  NMR (500 MHz,  $\text{CDCl}_3$ )  $\delta$  7.40 – 7.35 (m, 2H), 7.34 – 7.29 (m, 2H), 7.07 (s, 1H), 5.30 – 5.23 (m, 1H), 3.74 (s, 2H), 2.19 – 2.10 (m, 1H), 2.07 – 1.94 (m, 2H), 1.76 (s, 3H), 1.68 (s, 3H), 0.97 (d,  $J = 6.4$  Hz, 6H);  $^{13}\text{C}$  NMR (126 MHz,  $\text{CDCl}_3$ )  $\delta$  171.5, 167.5, 163.2, 131.7, 130.9, 129.5, 60.0, 58.4, 43.4, 41.1, 28.3, 26.8, 24.6, 23.0, 21.6; HRMS calcd for  $\text{C}_{18}\text{H}_{24}\text{ClN}_6\text{O}_2$   $[\text{M}+\text{H}]^+$ : 391.16304; found  $[\text{M}+\text{H}]^+$ : 391.16296.

**12: N-(5-isobutyl-8,8-dimethyl-6-oxo-5,6-dihydro-1,5-a)pyrazin-7(8H)-yl)-4 methylbenzenesulfonamide**

The product was obtained as white solid (260 mg, 66% yield), M.P. = 175–177 °C;  $^1\text{H}$  NMR (500 MHz,  $\text{DMSO}-d_6$ )  $\delta$  10.34 (s, 1H), 7.70 (d,  $J = 7.8$  Hz, 2H), 7.37 (d,  $J = 8.0$  Hz, 2H), 5.37 (s, 1H), 2.39 (s, 3H), 1.94 – 1.83 (m, 1H), 1.69 (s, 6H), 1.54 (s, 2H), 0.86 (d,  $J = 6.4$  Hz, 3H), 0.77 (s, 3H);  $^{13}\text{C}$  NMR (126 MHz,  $\text{DMSO}-d_6$ )  $\delta$  166.0, 154.5, 143.5, 129.3, 127.8, 57.9, 41.9, 27.2, 26.7, 24.1, 22.6, 21.3, 21.0; HRMS calcd for  $\text{C}_{17}\text{H}_{25}\text{N}_6\text{O}_3\text{S}$   $[\text{M}+\text{H}]^+$ : 393.17034; found  $[\text{M}+\text{H}]^+$ : 393.17029.

**13: 1-(5-isobutyl-8,8-dimethyl-6-oxo-5,6-dihydro-1,5-a)pyrazin-7(8H)-yl)-3-phenylthiourea**

The product was obtained as white solid (210 mg, 56% yield), M.P. = 233–235 °C;  $^1\text{H}$  NMR (500 MHz,  $\text{DMSO}-d_6$ )  $\delta$  10.12 (s, 1H), 9.74 (s, 1H), 7.34 (t,  $J = 7.7$  Hz, 2H), 7.27 (d,  $J = 8.0$  Hz, 2H), 7.21 (t,  $J = 7.5$  Hz, 1H), 5.39 (t,  $J = 6.5$  Hz, 1H), 1.99 (t,  $J = 6.8$  Hz, 2H), 1.82 (s, 3H), 1.64 (s, 3H), 1.08 – 1.02 (m, 1H), 0.94 (dd,  $J = 11.4, 6.5$  Hz, 6H);  $^{13}\text{C}$  NMR (126 MHz,  $\text{DMSO}-d_6$ )  $\delta$  182.1, 164.3, 154.6, 138.5, 128.2, 126.5, 126.0, 58.9, 58.1, 41.9, 29.0, 24.1, 23.7, 22.9, 21.4; HRMS calcd for  $\text{C}_{17}\text{H}_{24}\text{N}_7\text{OS}$   $[\text{M}+\text{H}]^+$ : 374.17576; found  $[\text{M}+\text{H}]^+$ : 374.17572.

**$^1\text{H}$ ,  $^{13}\text{C}$  NMR and mass spectra of the novel synthesized compounds :**

**6a: 7-amino-5-isobutyl-8,8-dimethyl-7,8-dihydro-tetrazolo[1,5-a]pyrazin-6(5H)-one**

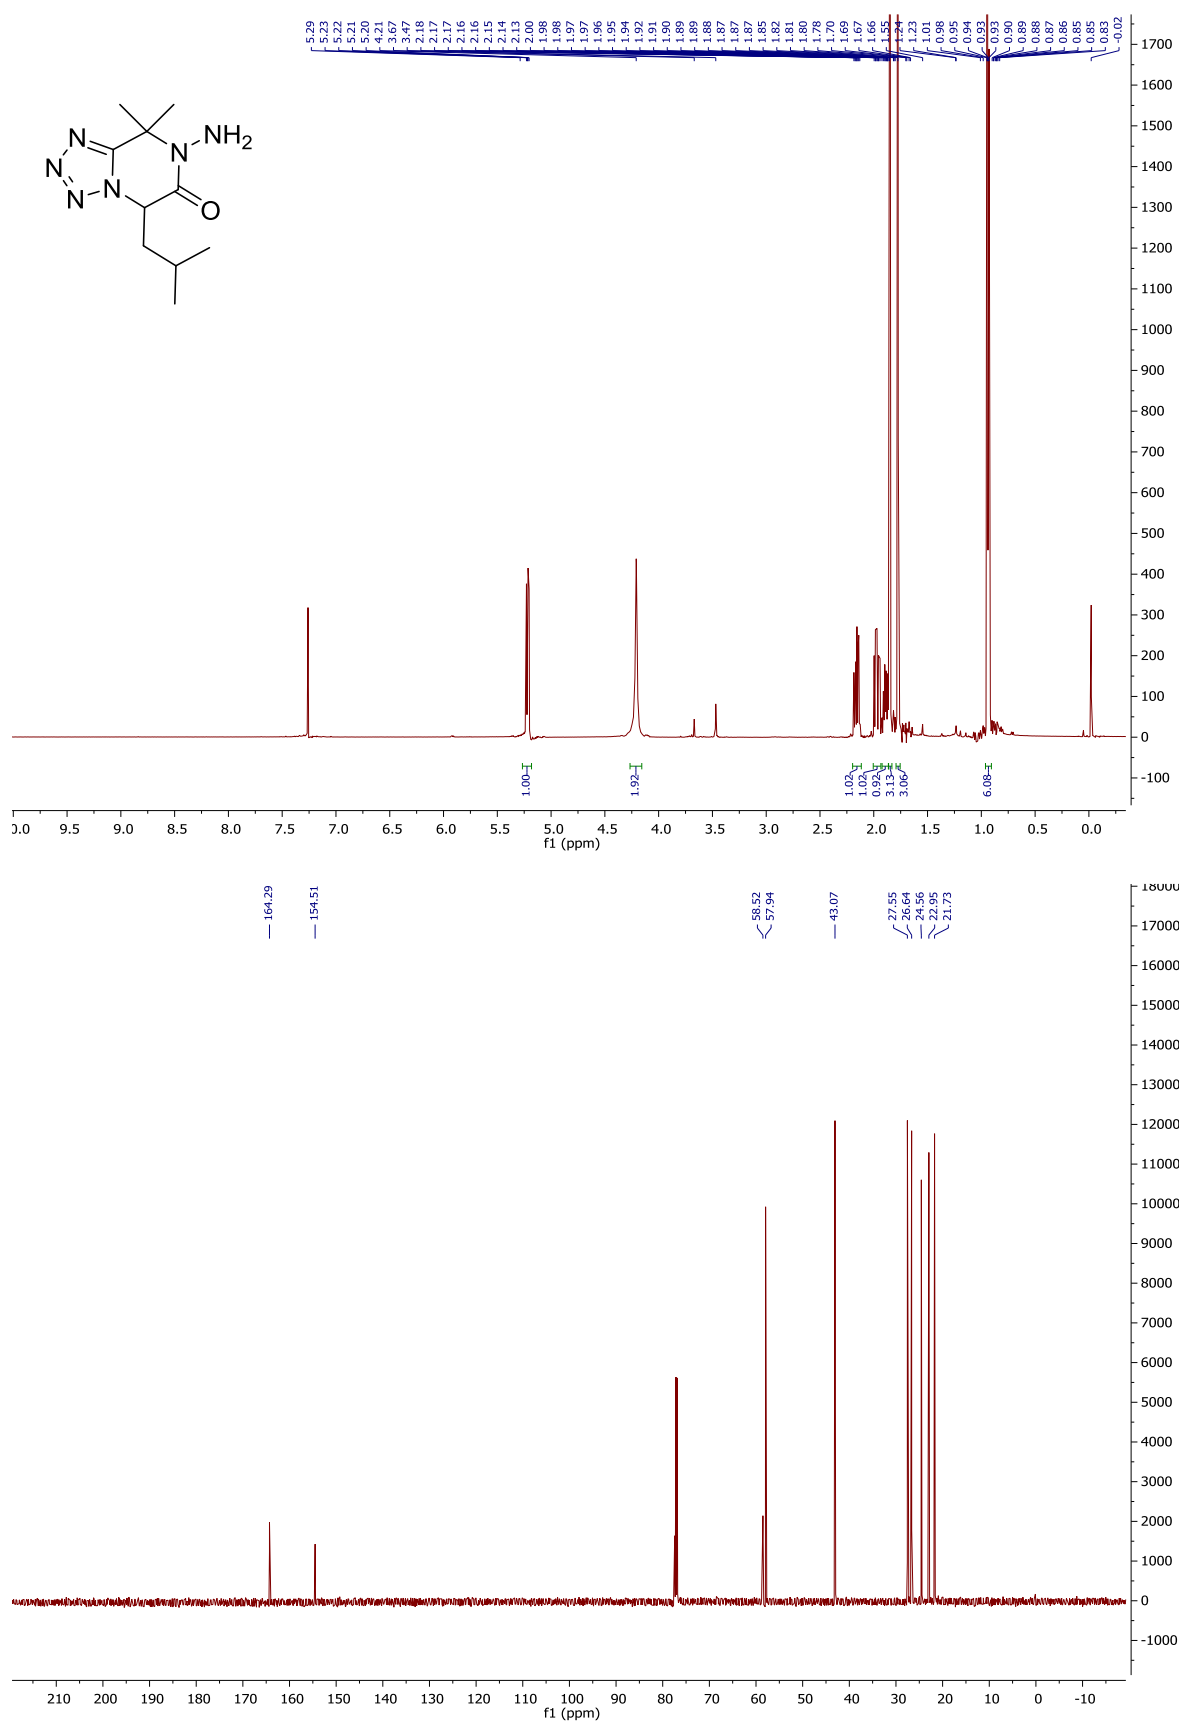

yz089-2NEW #13 RT: 0.19534 AV: 1 ↑  
T: FTMS + p ESI Full ms [150.00-750.00]

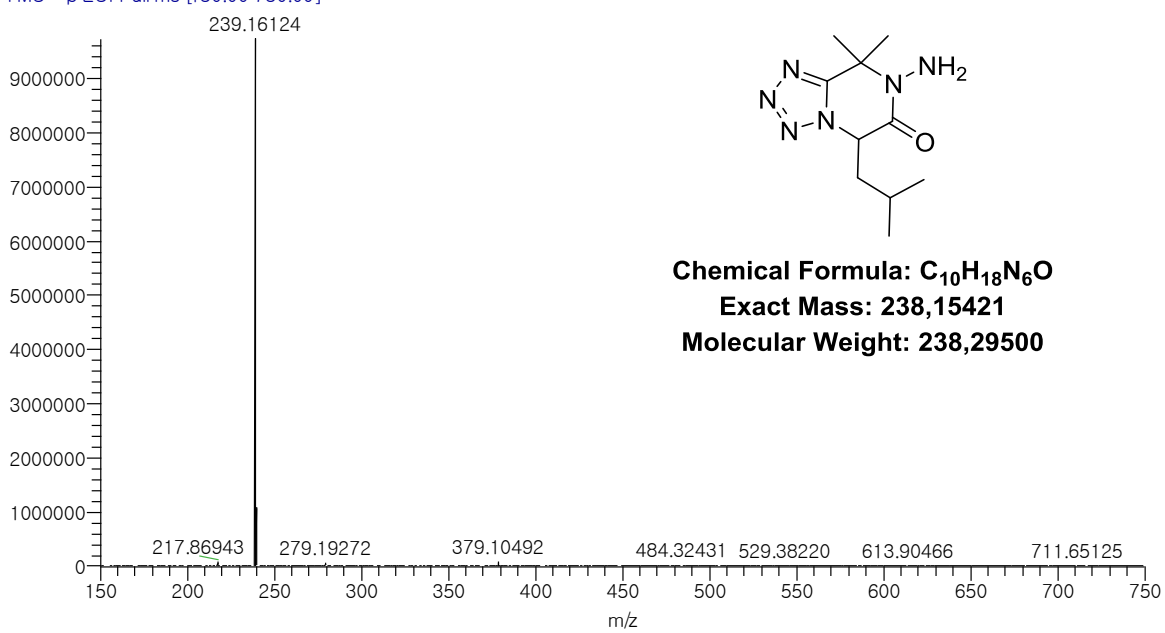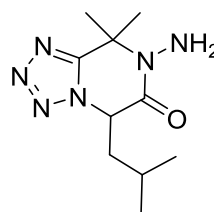

**Chemical Formula: C<sub>10</sub>H<sub>18</sub>N<sub>6</sub>O**  
**Exact Mass: 238,15421**  
**Molecular Weight: 238,29500**



**7a: 5-isobutyl-9,9-dimethyl-8,9-dihydro-5H-tetrazolo[5,1-d][1,2,5]triazepin-6(7H)-one**

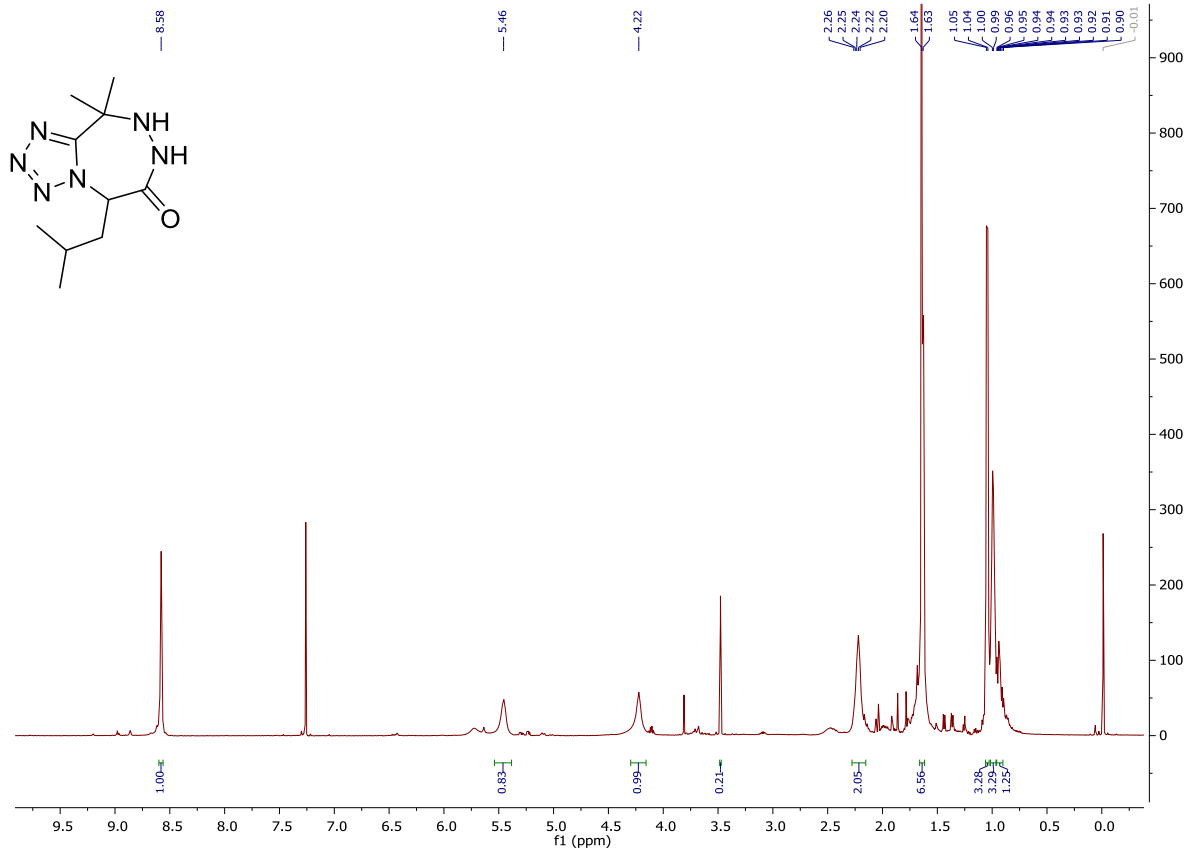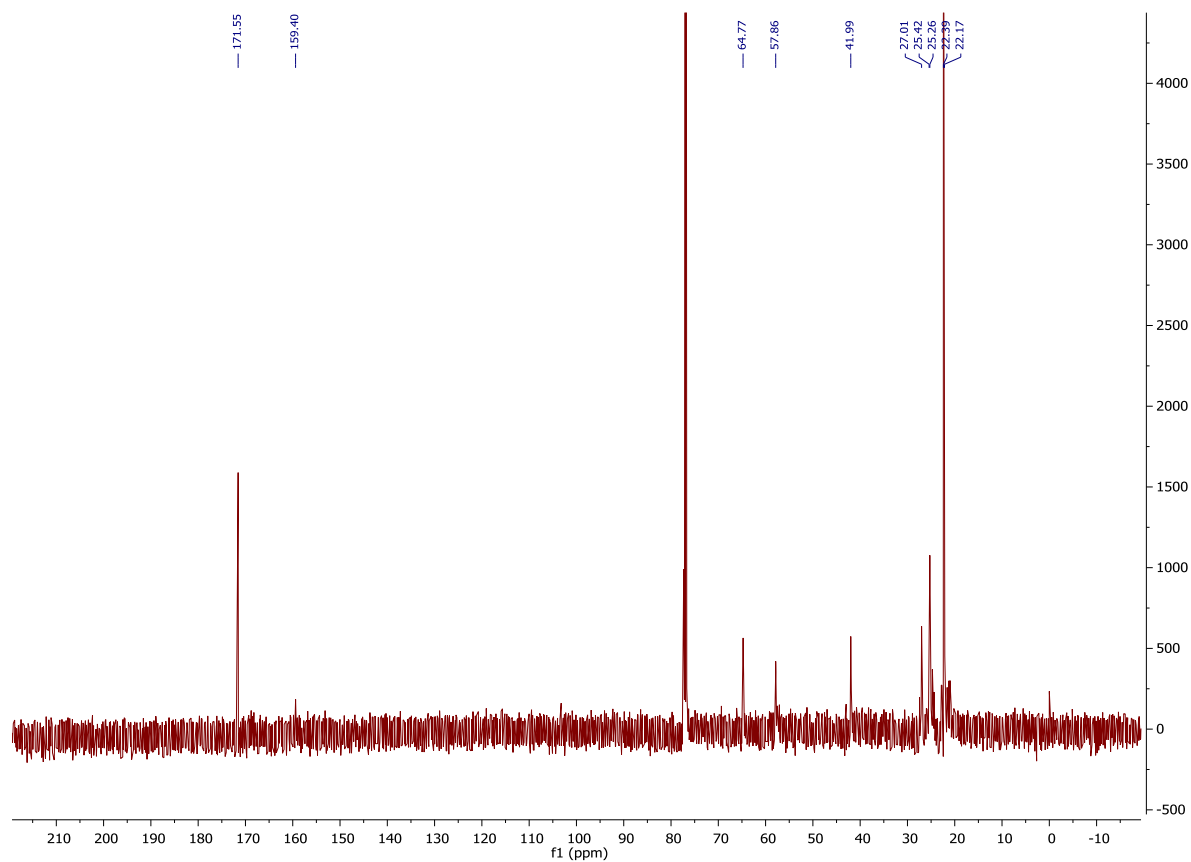

090-3 #20 RT: 0.34739 AV: 1 NL: 2.80E6  
T: FTMS + p ESI Full ms [150.00-750.00]

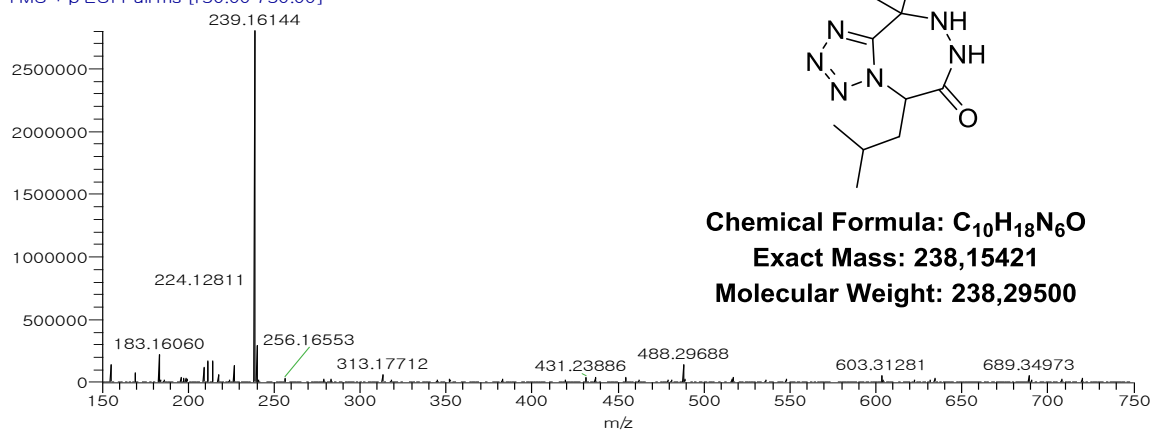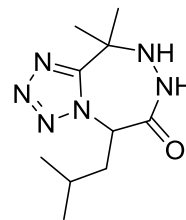

**Chemical Formula: C<sub>10</sub>H<sub>18</sub>N<sub>6</sub>O**

**Exact Mass: 238,15421**

**Molecular Weight: 238,29500**

**6b: 7-amino-8,8-dimethyl-7,8-dihydro-1,5-a-pyrazin-6(5H)-one**

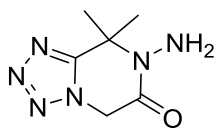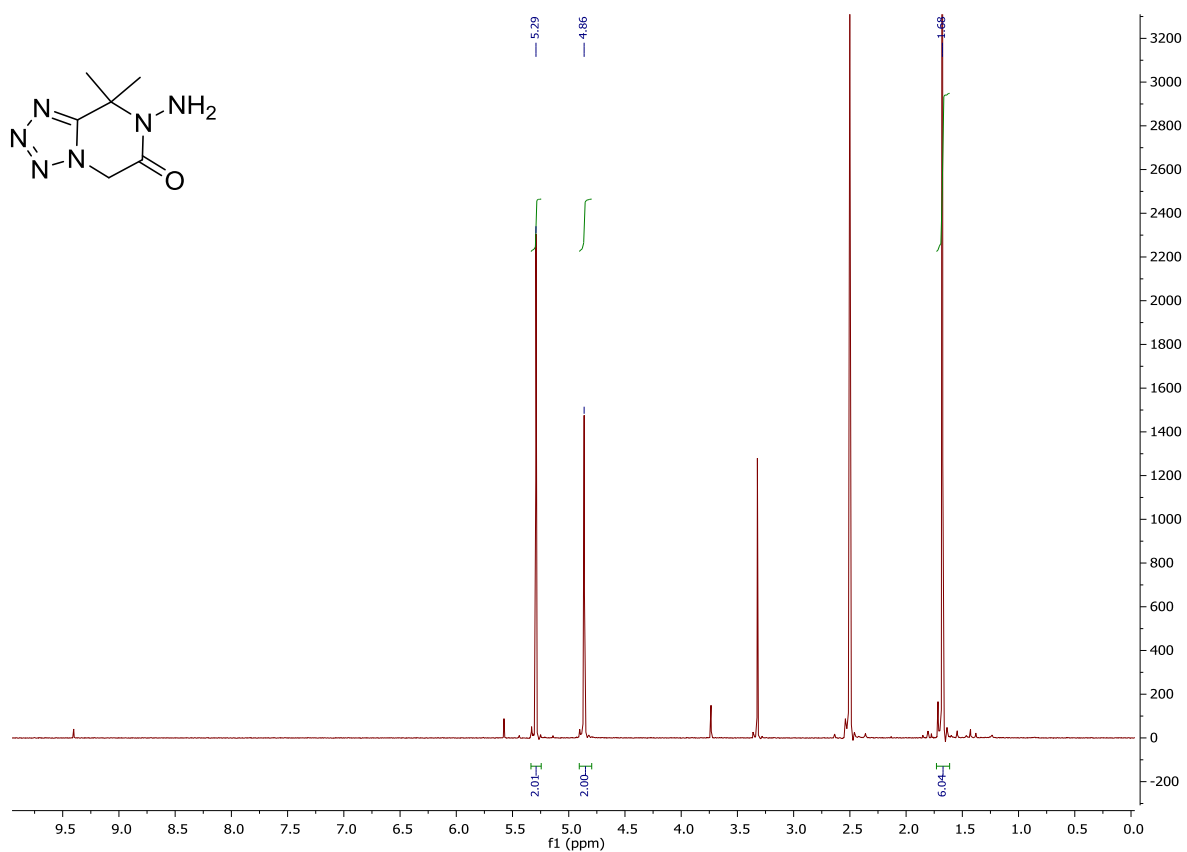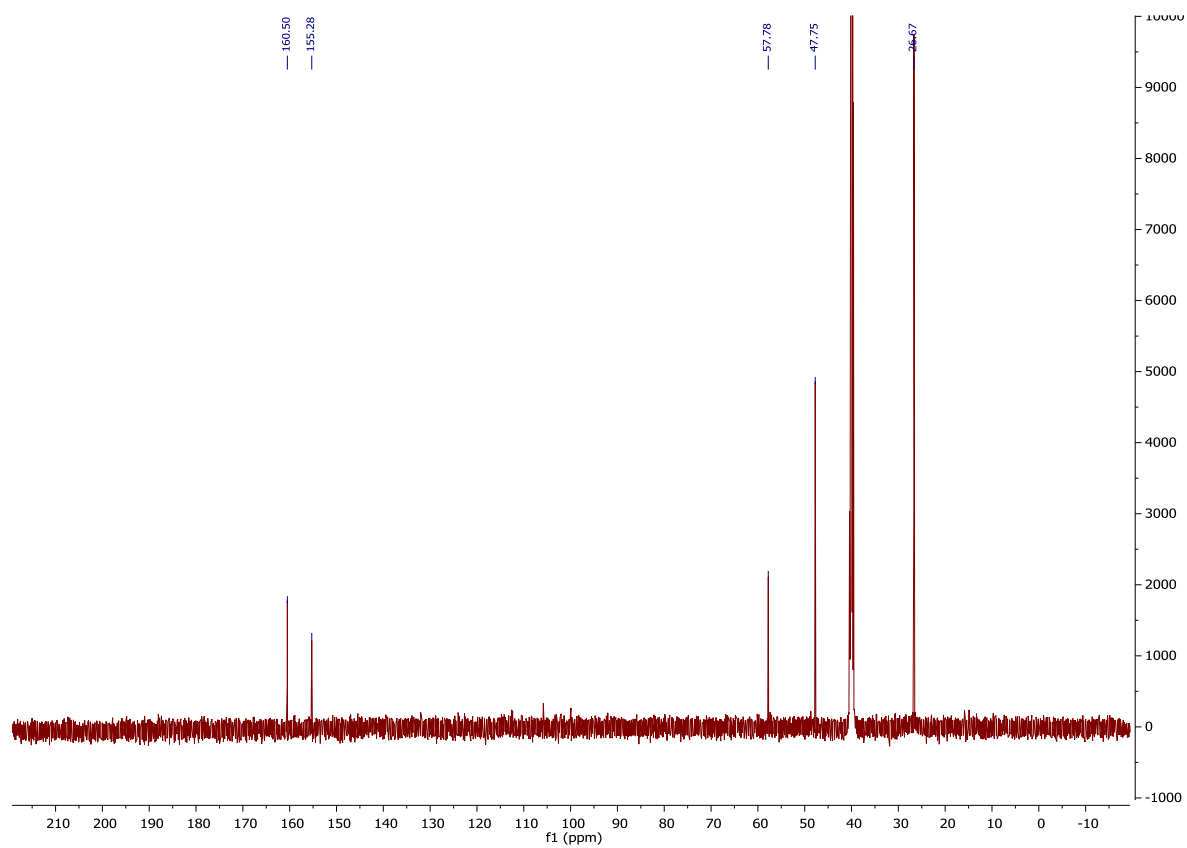

102a #17 RT: 0.28609 AV: 1 NL: 6.81E5  
T: FTMS + p ESI Full ms [150.00-750.00]

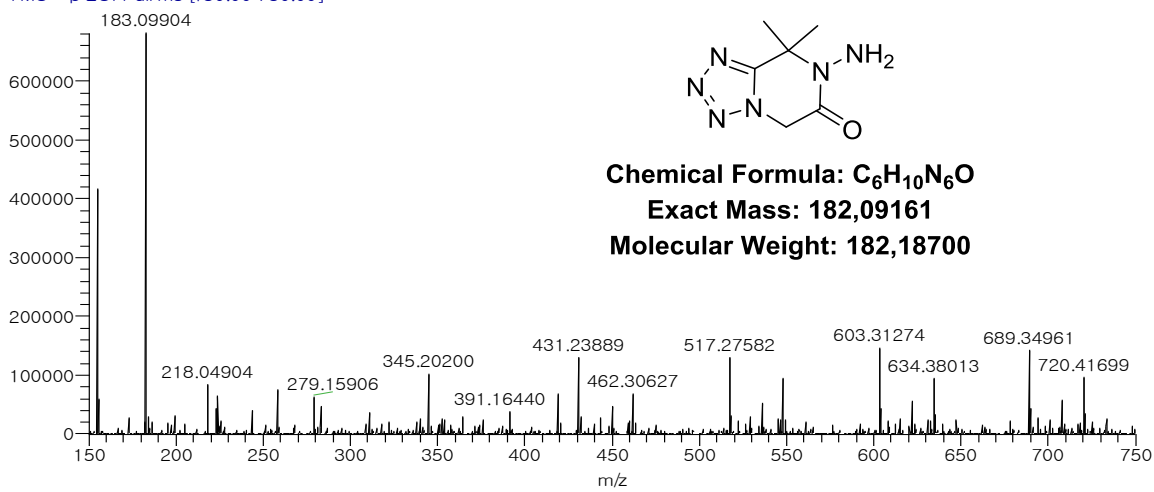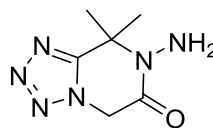

**Chemical Formula: C<sub>6</sub>H<sub>10</sub>N<sub>6</sub>O**

**Exact Mass: 182,09161**

**Molecular Weight: 182,18700**

**6c: 7'-amino-5'H-spiro[cyclohexane-1,8'-tetrazolo[1,5-a]pyrazin]-6'(7'H)-one**

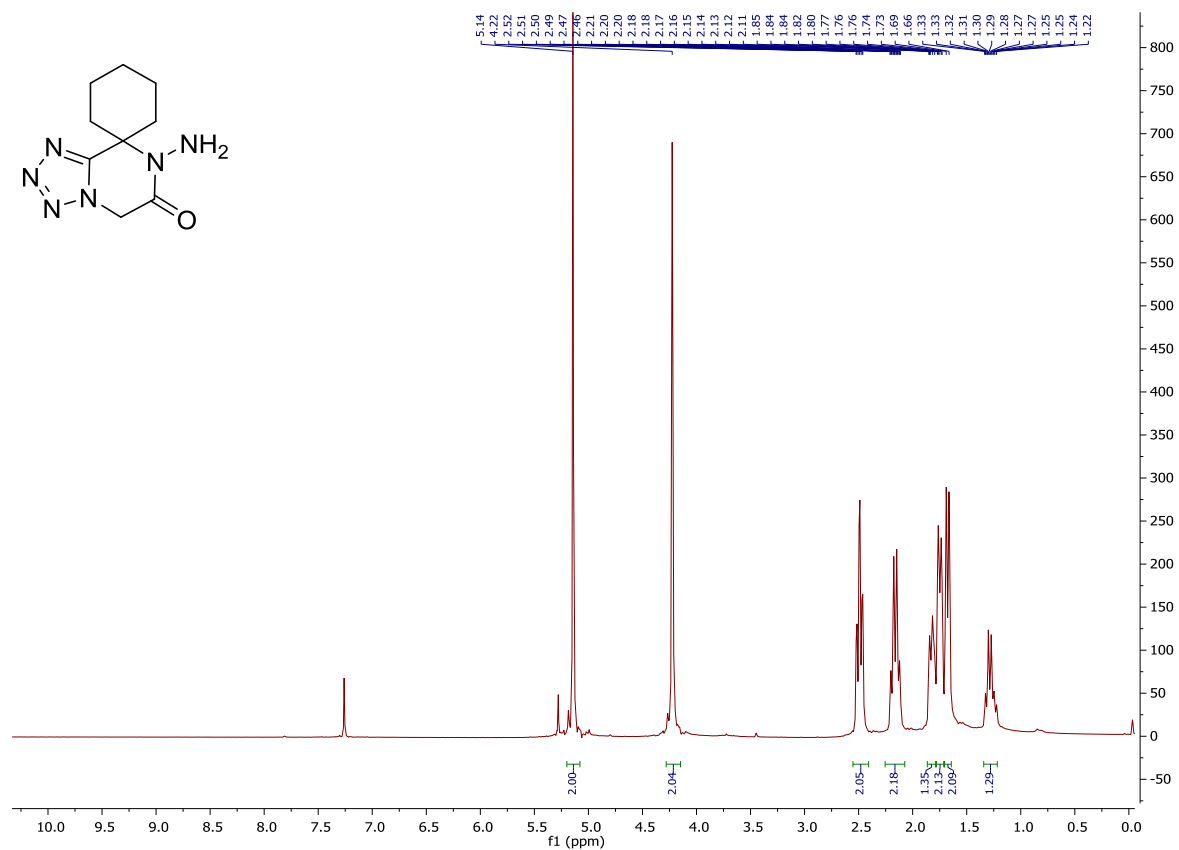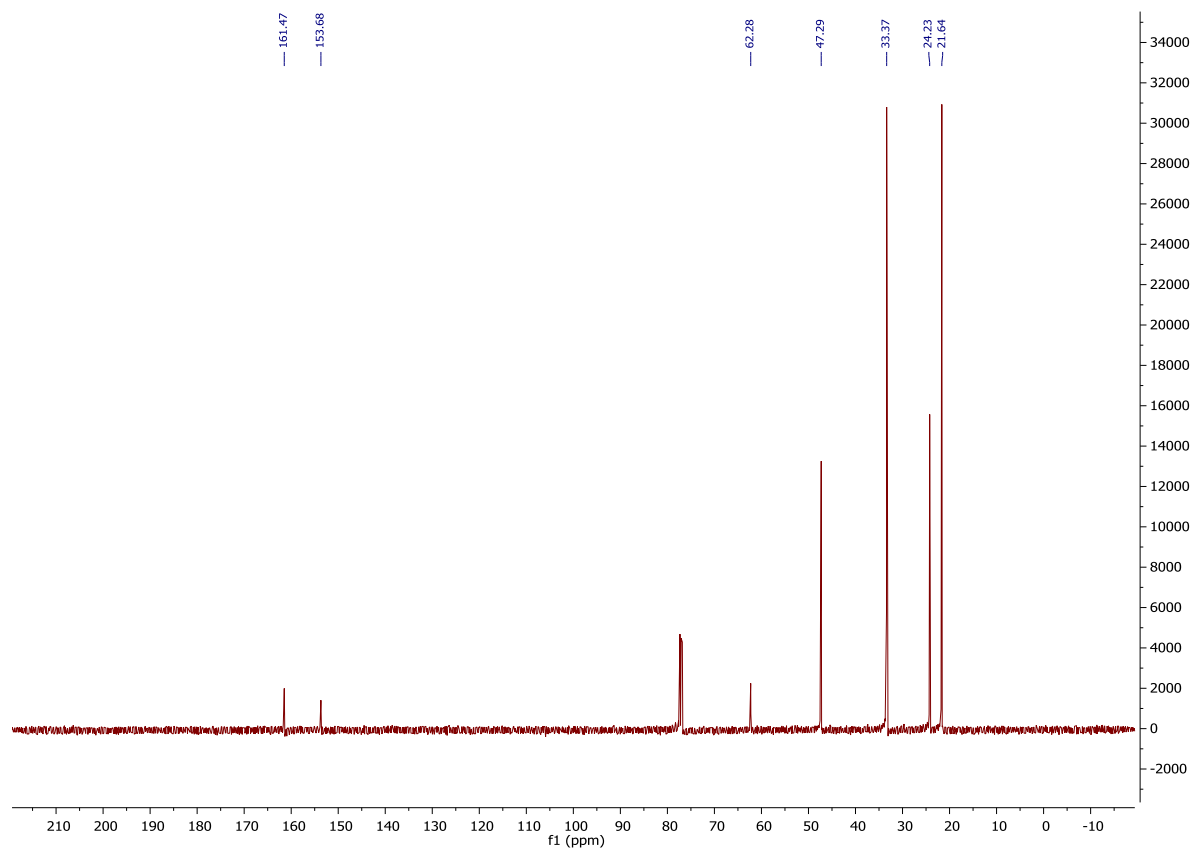

166HCL #20 RT: 0.35426 AV: 1 NL: 8  
T: FTMS + pESI Full ms [150.00-750.00]

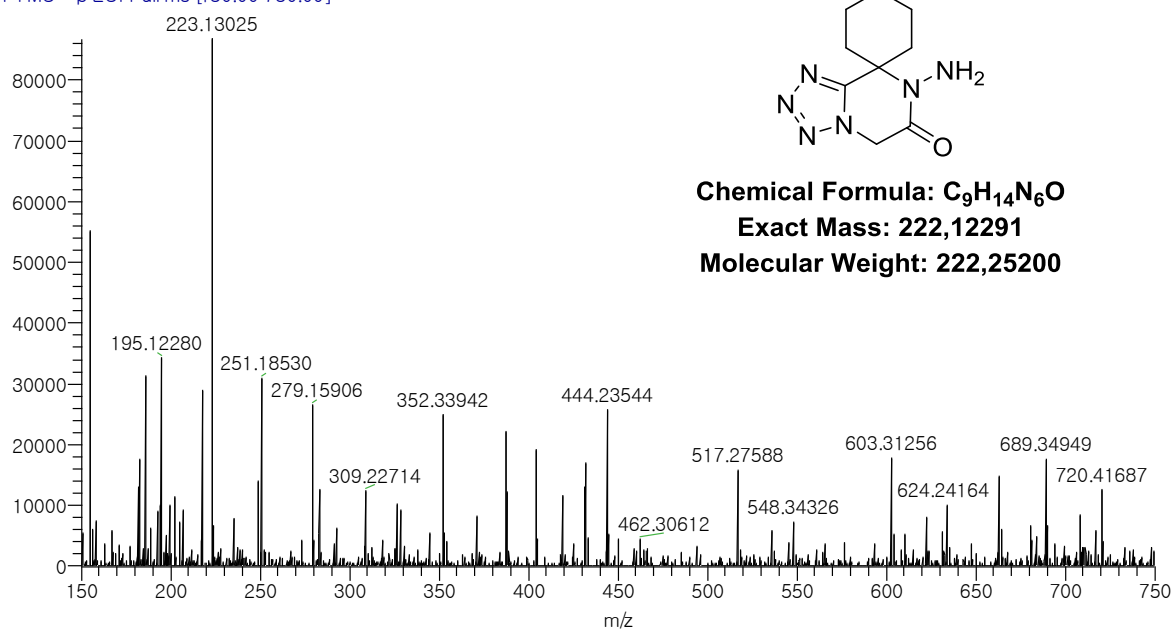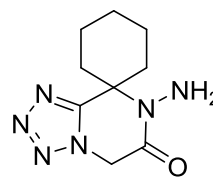

**Chemical Formula: C<sub>9</sub>H<sub>14</sub>N<sub>6</sub>O**

**Exact Mass: 222,12291**

**Molecular Weight: 222,25200**

**7c: 7',8'-dihydrospiro[cyclohexane-1,9'-tetrazolo[5,1-d][1,2,5]triazepin]-6'(5'H)-one**

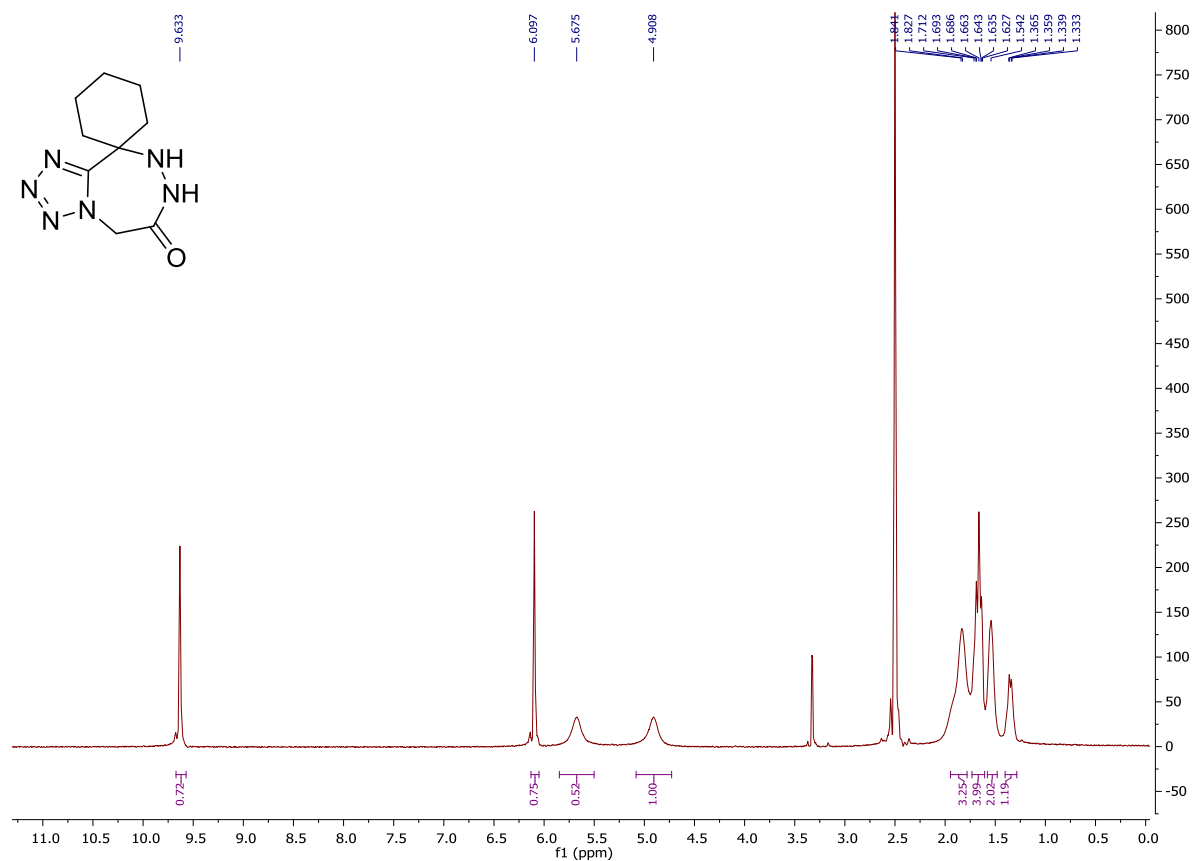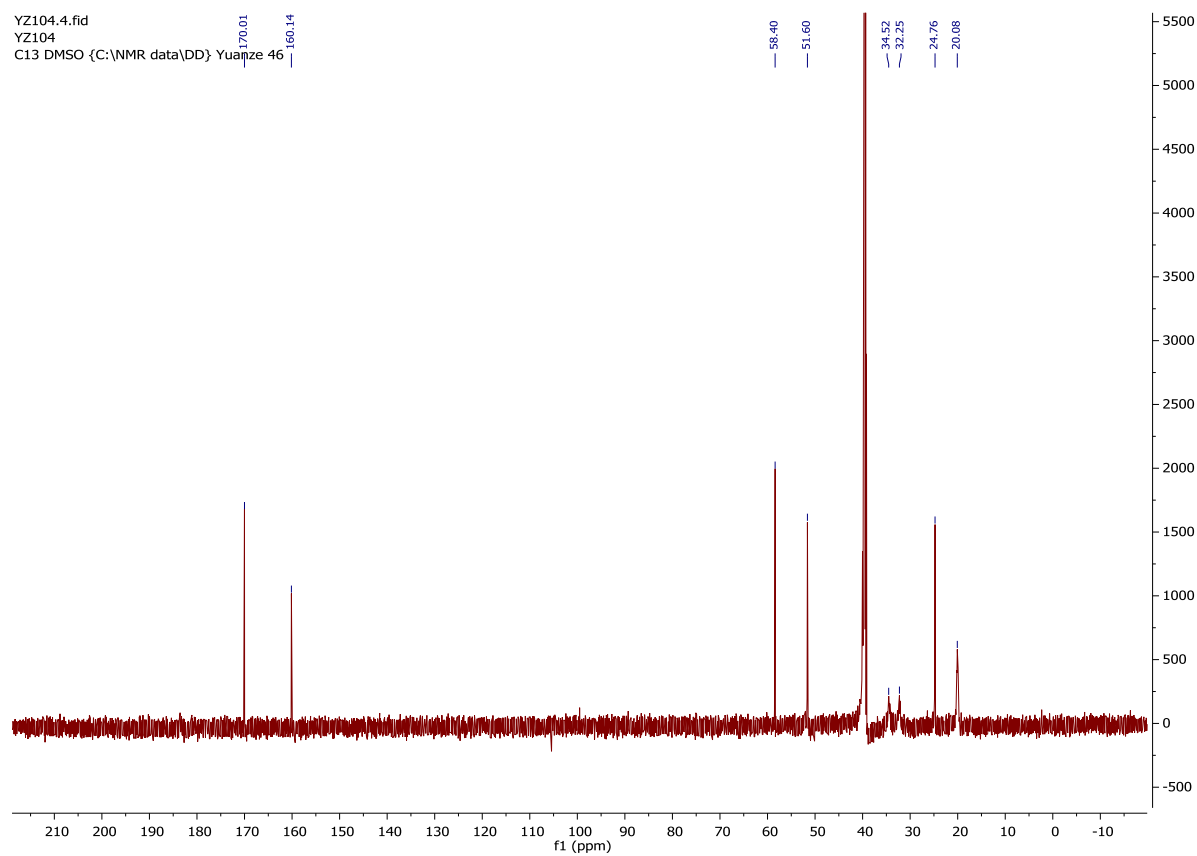

104b #21 RT: 0.35390 AV: 1 NL: 1.16E6  
T: FTMS +p ESI Full ms [150.00-750.00]

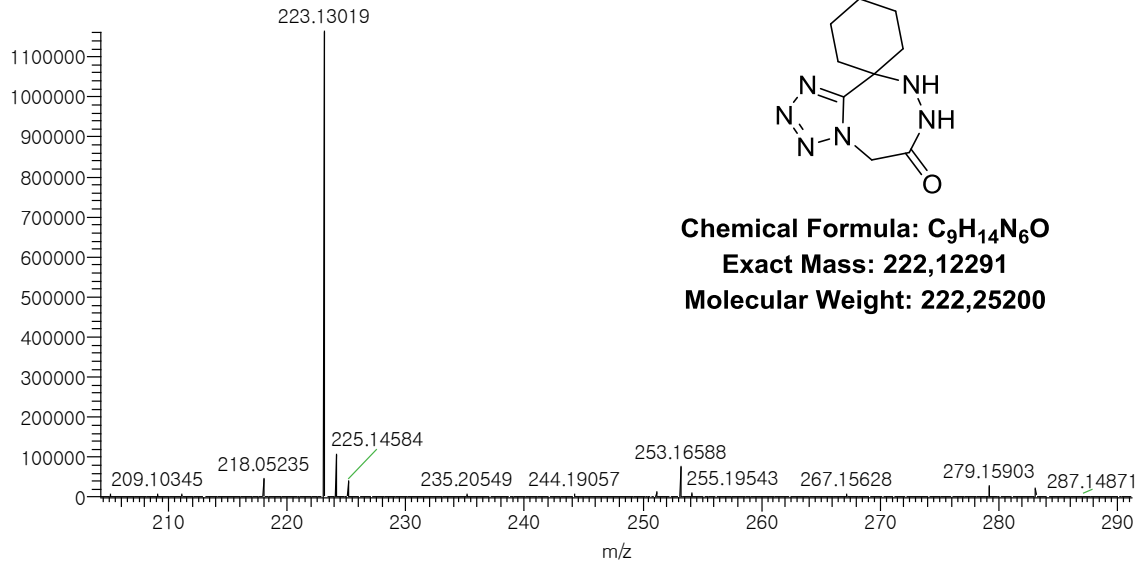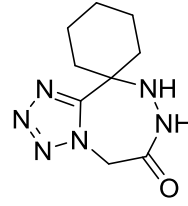

**Chemical Formula: C<sub>9</sub>H<sub>14</sub>N<sub>6</sub>O**

**Exact Mass: 222,12291**

**Molecular Weight: 222,25200**



# 7d: 9-isobutyl-8,9-dihydro-5H-tetrazolo[5,1-d][1,2,5]triazepin-6(7H)-one

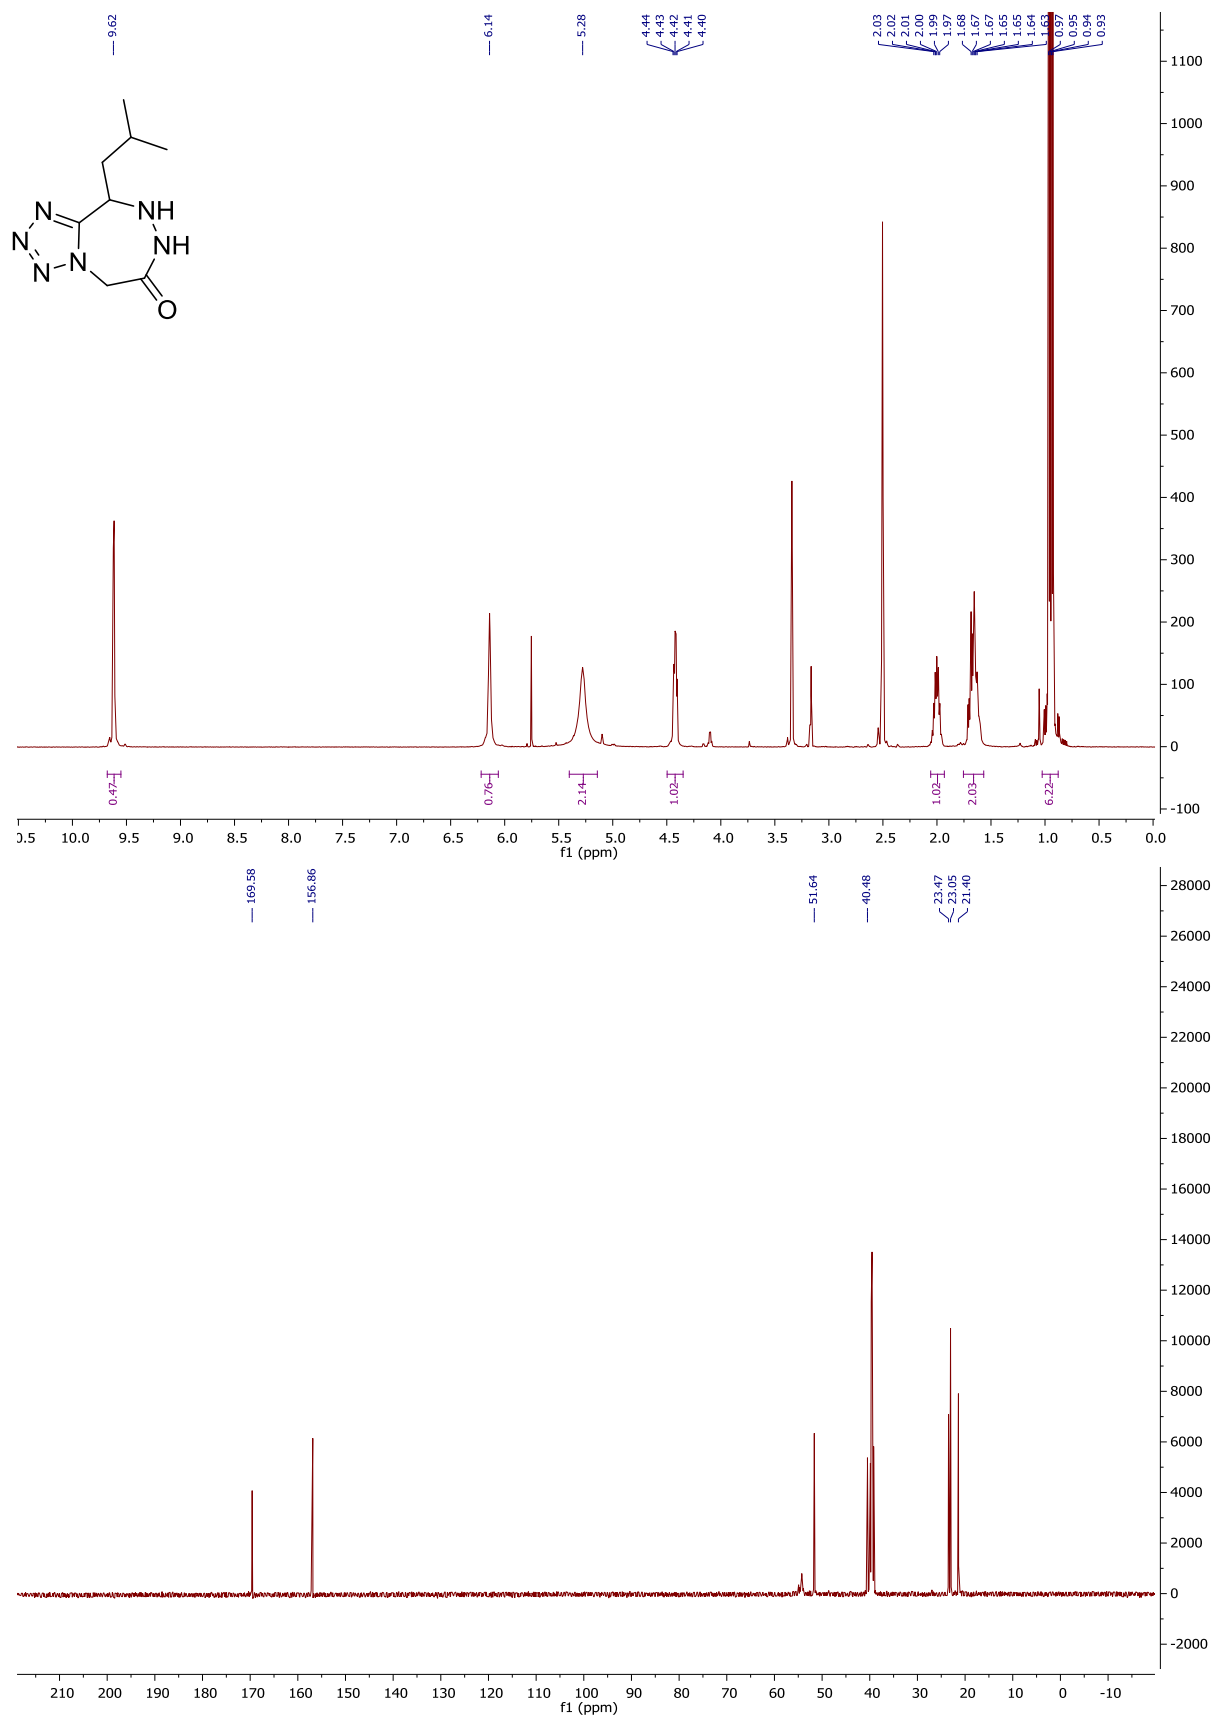

108b #20 RT: 0.34934 AV: 1 NL: 2.16E6  
T: FTMS +p ESI Full ms [150.00-750.00]

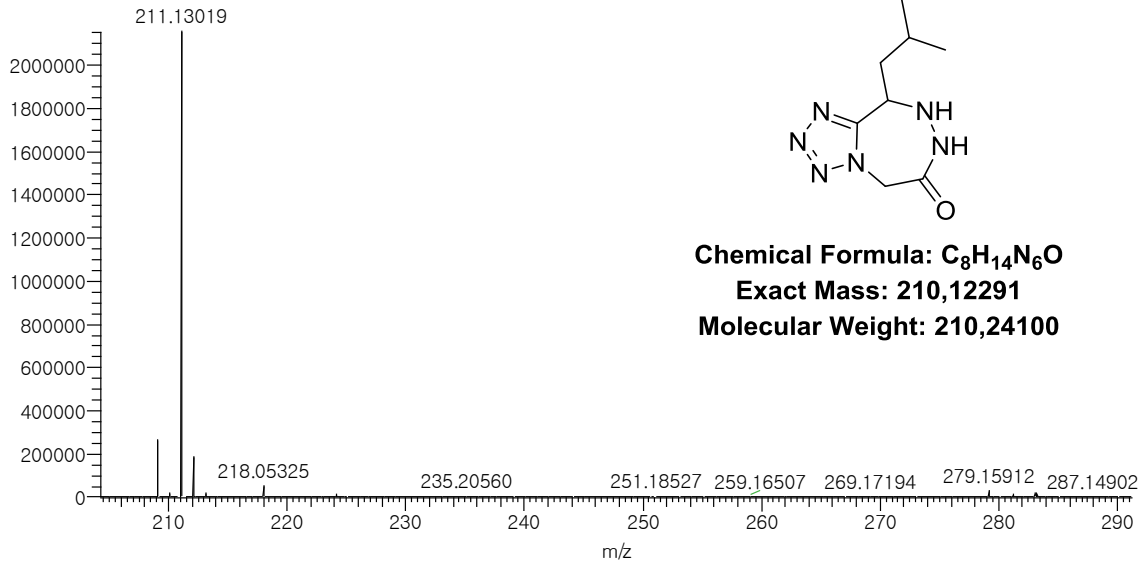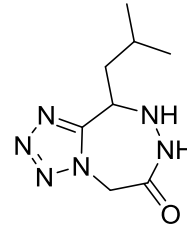

**Chemical Formula: C<sub>8</sub>H<sub>14</sub>N<sub>6</sub>O**

**Exact Mass: 210,12291**

**Molecular Weight: 210,24100**

**6e: 7-amino-8-phenethyl-7,8-dihydro-tetrazolo[1,5-a]pyrazin-6(5H)-one**

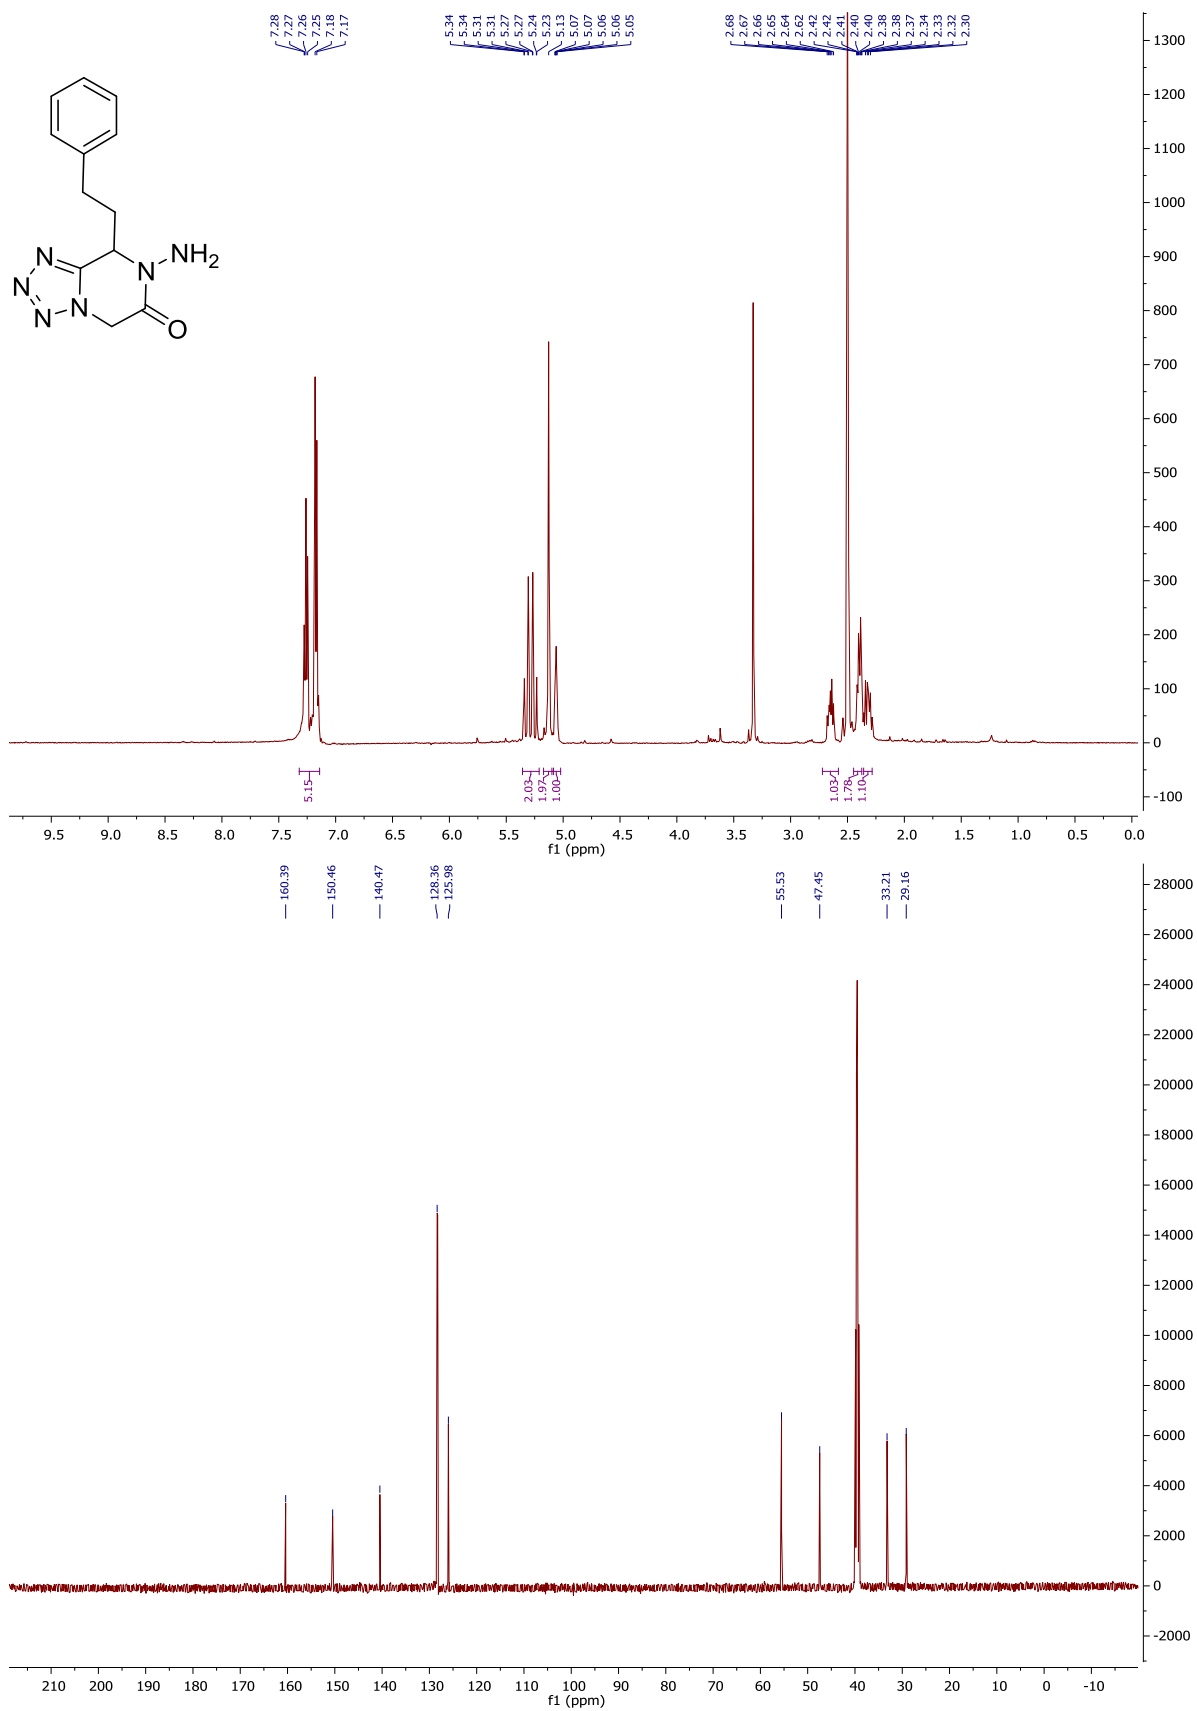

112A #10-14 RT: 0.18034-0.24604 AV:  
T: FTMS + pESI Full ms [150.00-750.00]

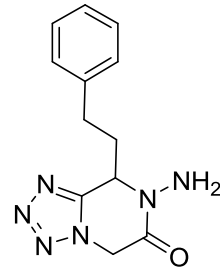

**Chemical Formula: C<sub>12</sub>H<sub>14</sub>N<sub>6</sub>O**  
**Exact Mass: 258,12291**  
**Molecular Weight: 258,28500**

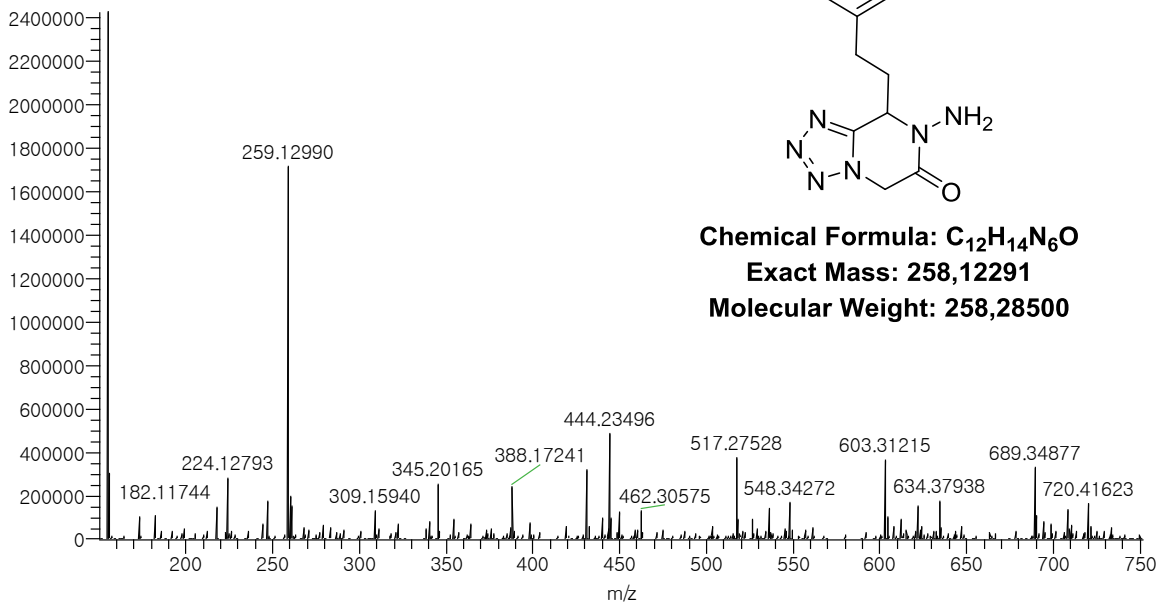

**7e: 9-phenethyl-8,9-dihydro-5H-tetrazolo[5,1-d][1,2,5]triazepin-6(7H)-one**

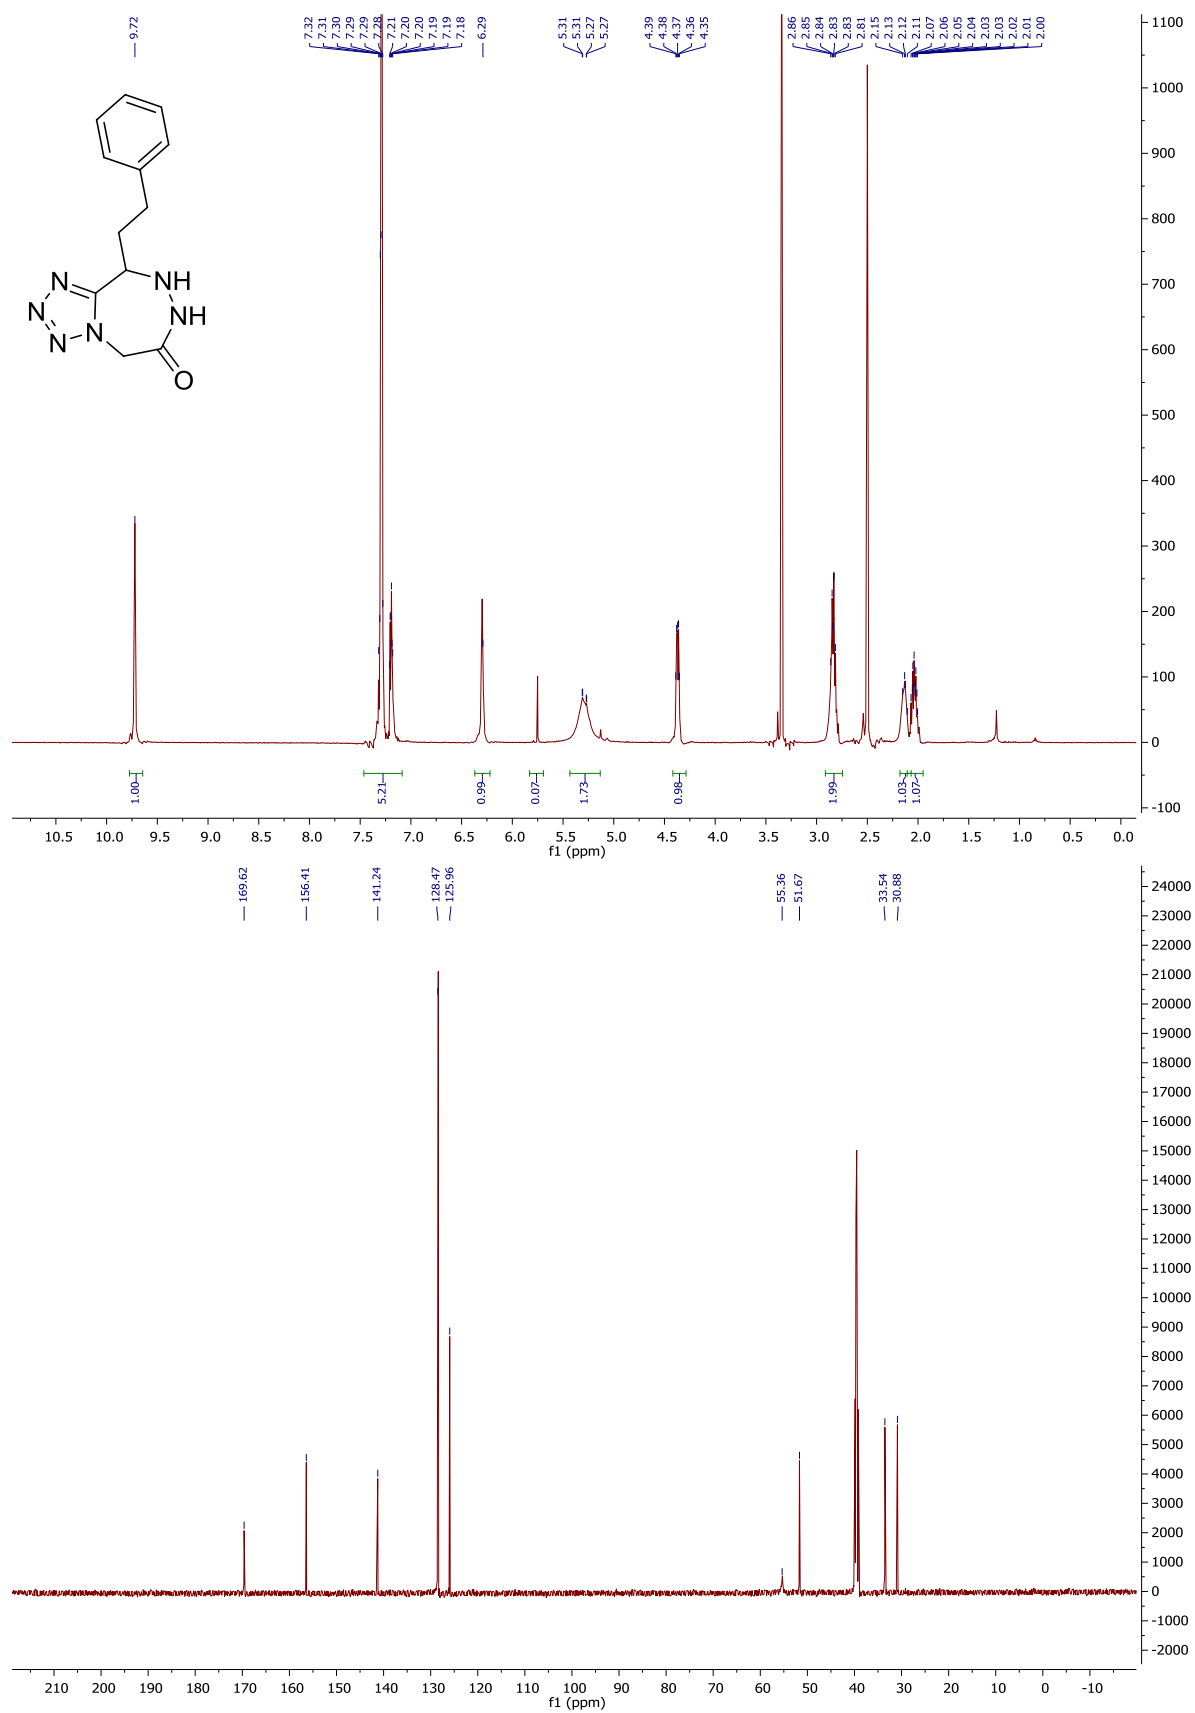

112b #10-15 RT: 0.17200-0.25837 AV:  
T: FTMS + pESI Full ms [150.00-750.00]

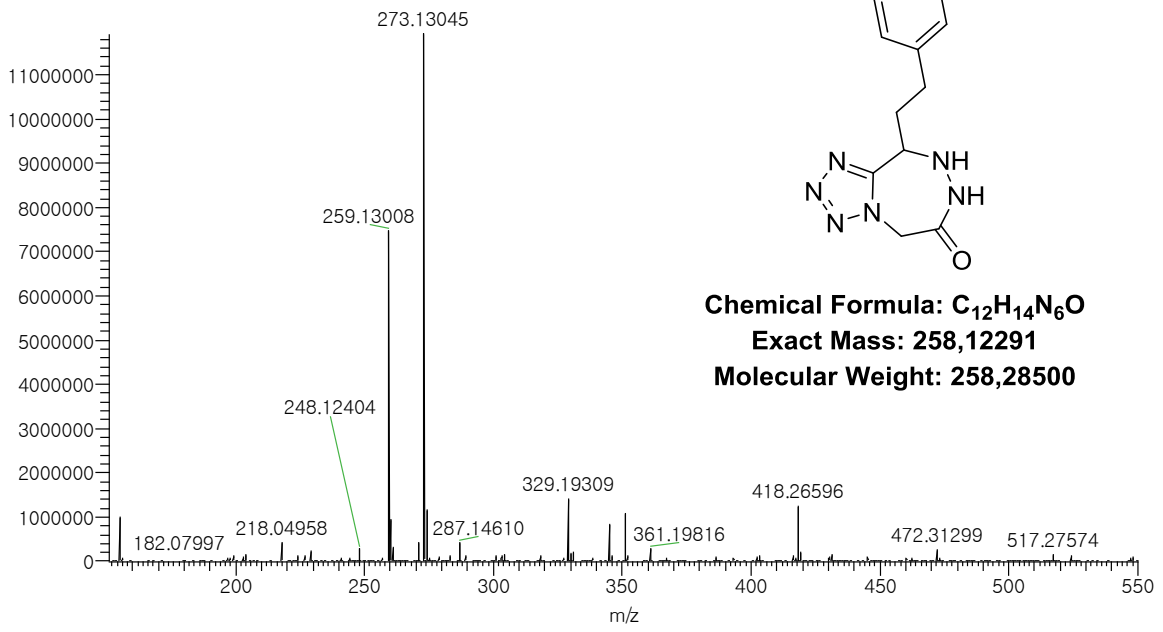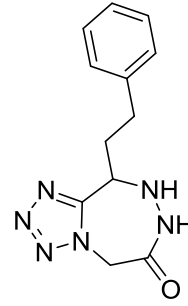

**Chemical Formula: C<sub>12</sub>H<sub>14</sub>N<sub>6</sub>O**  
**Exact Mass: 258,12291**  
**Molecular Weight: 258,28500**

**6f: 7-amino-8-isopropyl-7,8-dihydro-1,5-tetrazolo[1,5-a]pyrazin-6(5H)-one**

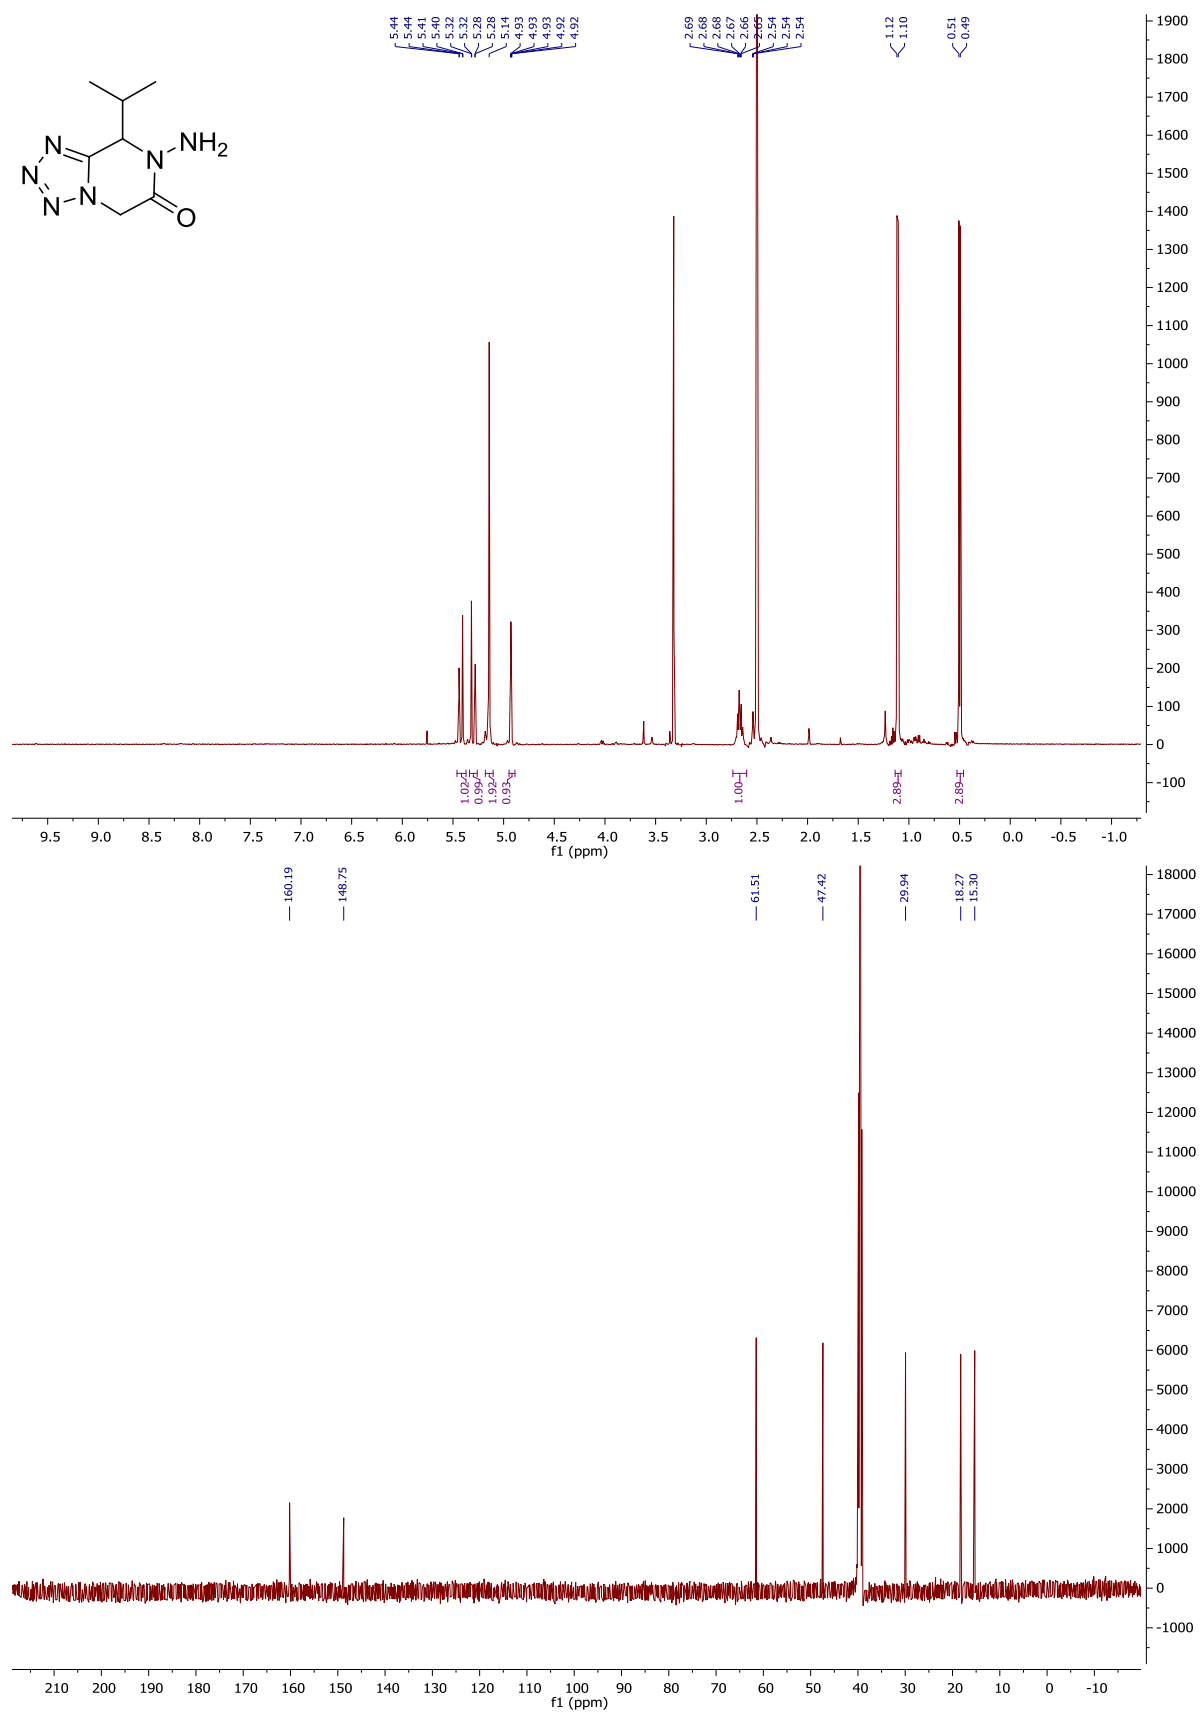

114a #9-14 RT: 0.16763-0.25226 AV: 6 INL: 3.44E0  
T: FTMS +p ESI Full ms [150.00-750.00]

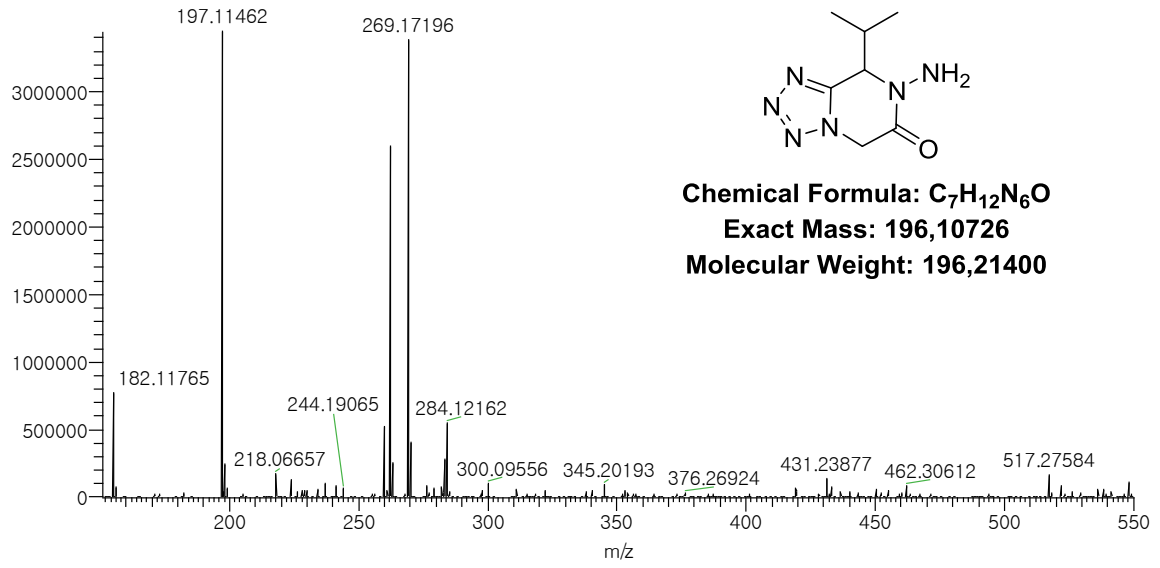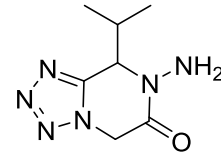

**Chemical Formula: C<sub>7</sub>H<sub>12</sub>N<sub>6</sub>O**

**Exact Mass: 196,10726**

**Molecular Weight: 196,21400**



**7f: 9-isopropyl-8,9-dihydro-5H-tetrazolo[5,1-d][1,2,5]triazepin-6(7H)-one**

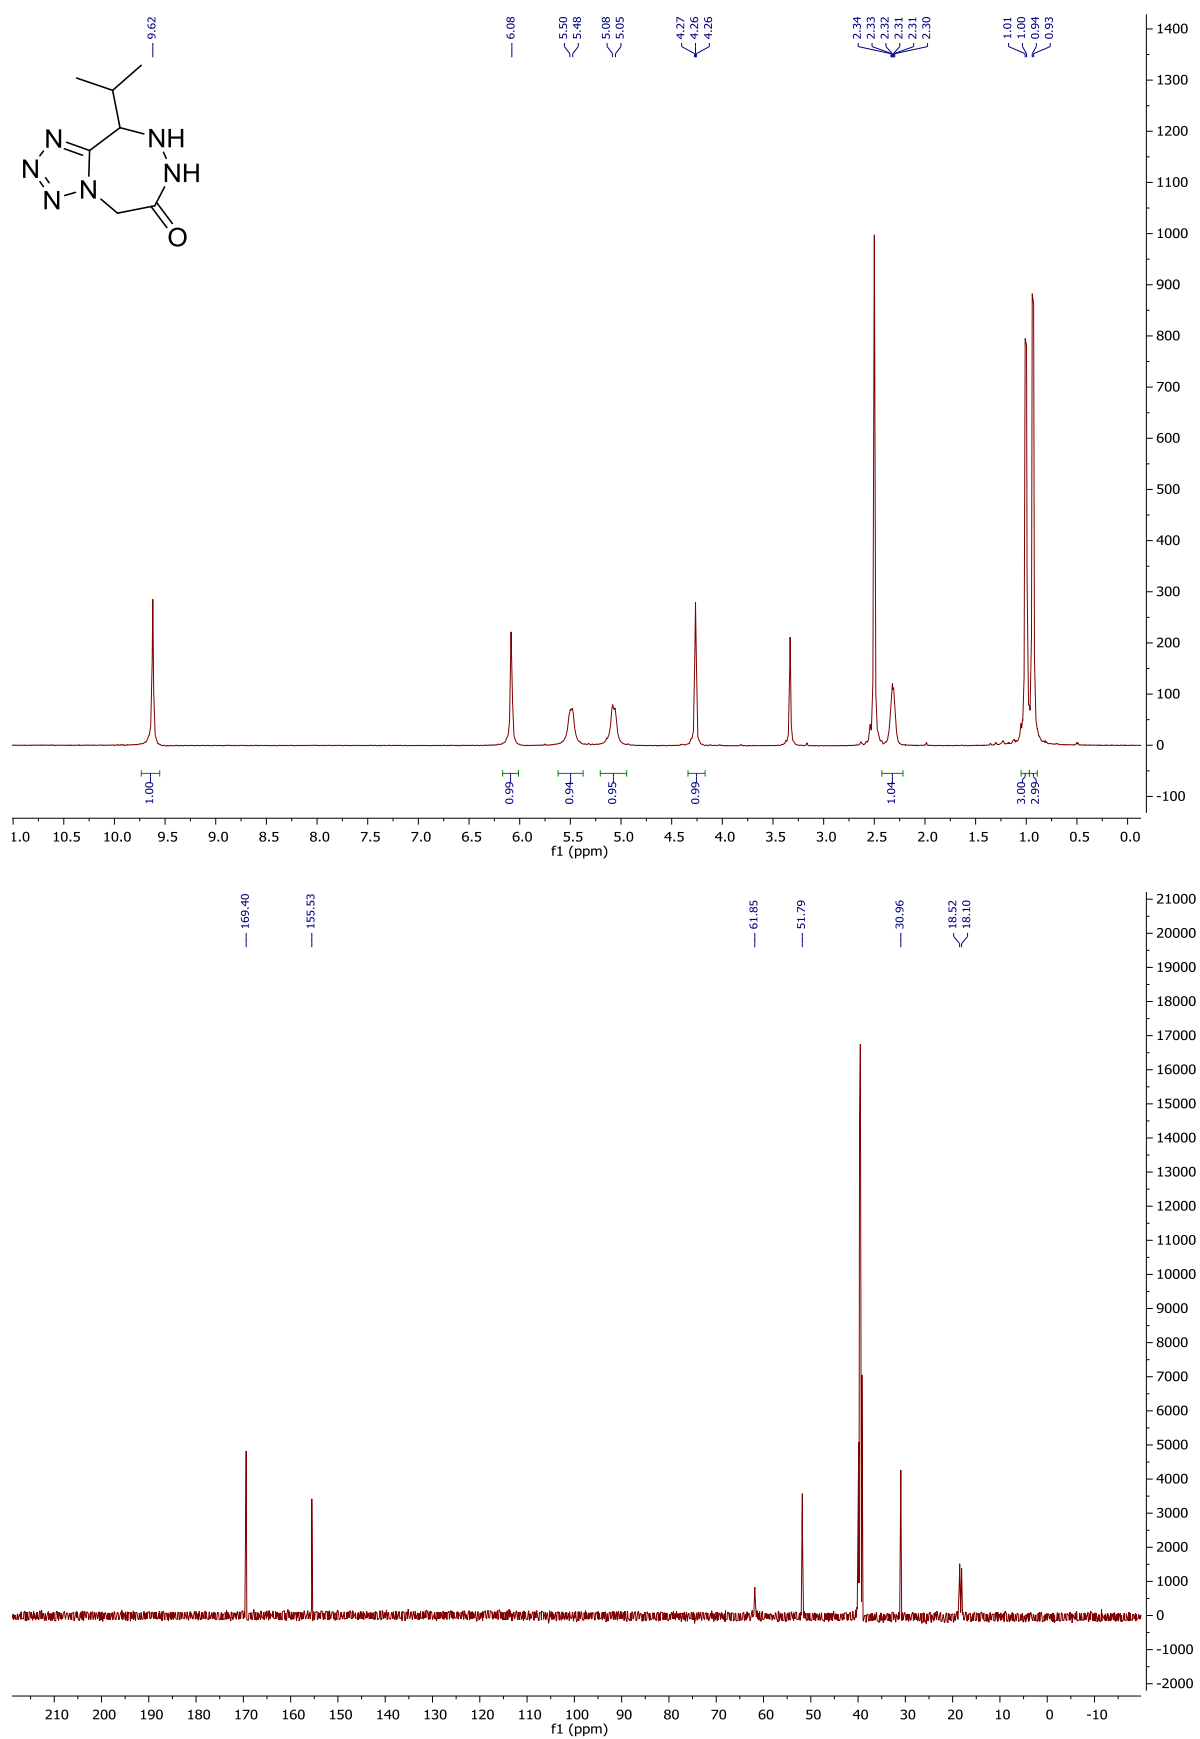

114b #9-14 RT: 0.17497-0.25395 AV: 6 INL: 4.0200  
T: FTMS +p ESI Full ms [150.00-750.00]

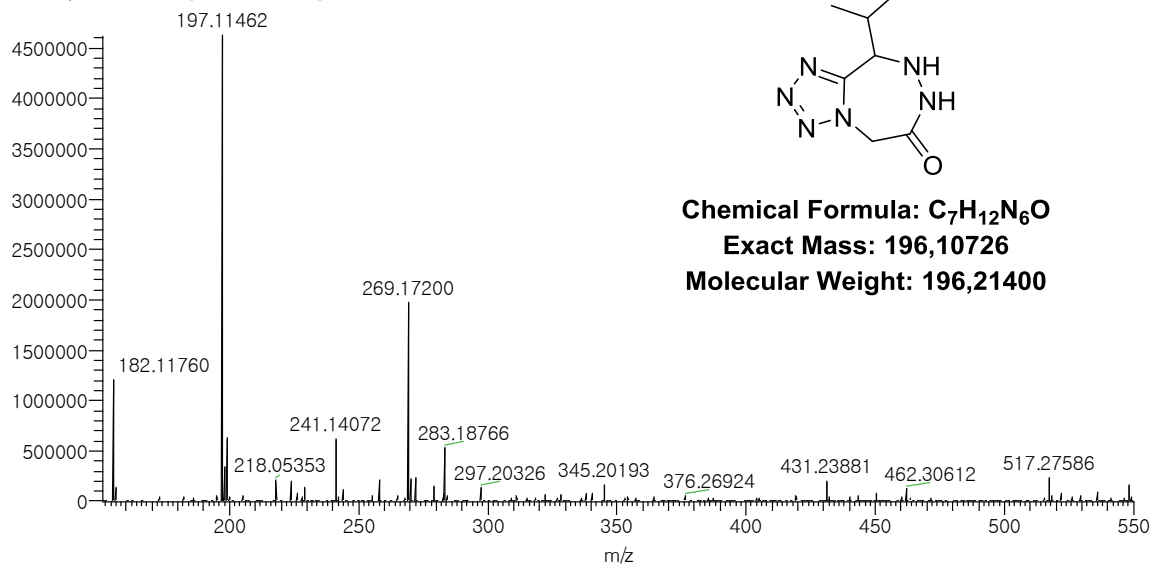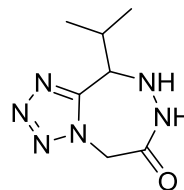

**Chemical Formula: C<sub>7</sub>H<sub>12</sub>N<sub>6</sub>O**  
**Exact Mass: 196,10726**  
**Molecular Weight: 196,21400**



116a #9-14 RT: 0.16811-0.25293 AV: 6  
T: FTMS +p ESI Full ms [150.00-750.00]

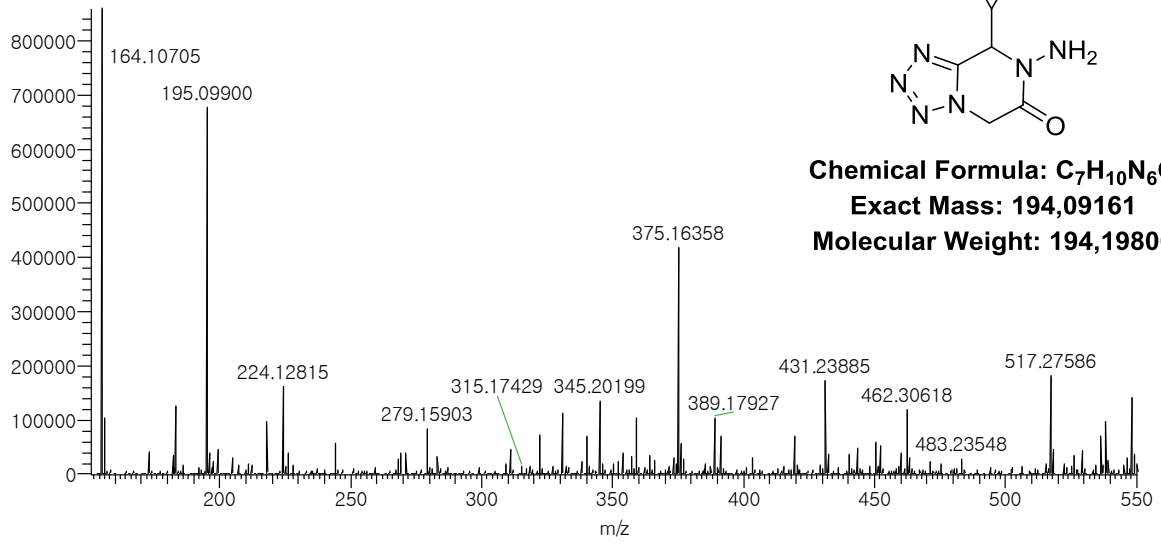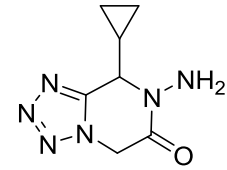

**Chemical Formula: C<sub>7</sub>H<sub>10</sub>N<sub>6</sub>O**

**Exact Mass: 194,09161**

**Molecular Weight: 194,19800**

# 6h: 7-amino-5-benzyl-8,8-dimethyl-7,8-dihydro-1,5-diazepino[4,3-b]pyridin-6(5H)-one

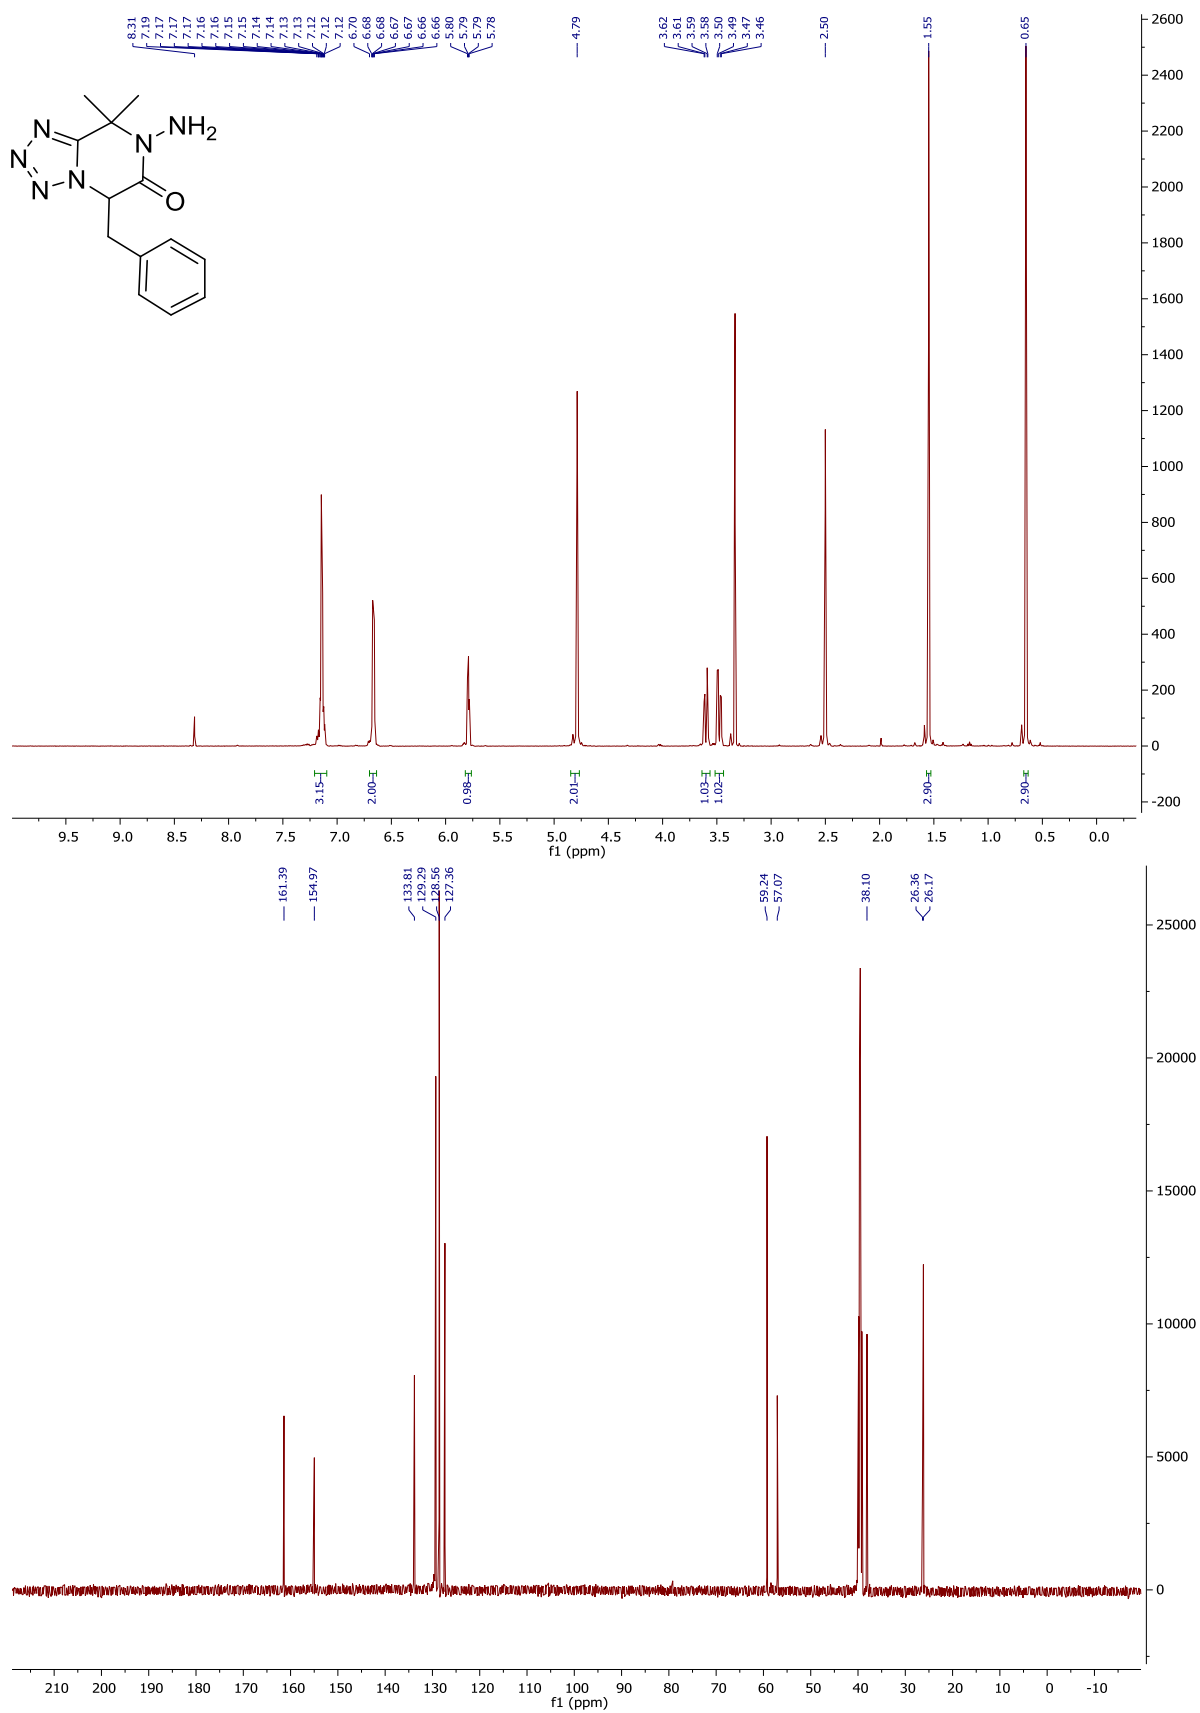

118 #10-15 RT: 0.17473-0.25155 AV: 6 INL: 4.91E0  
T: FTMS +p ESI Full ms [150.00-750.00]

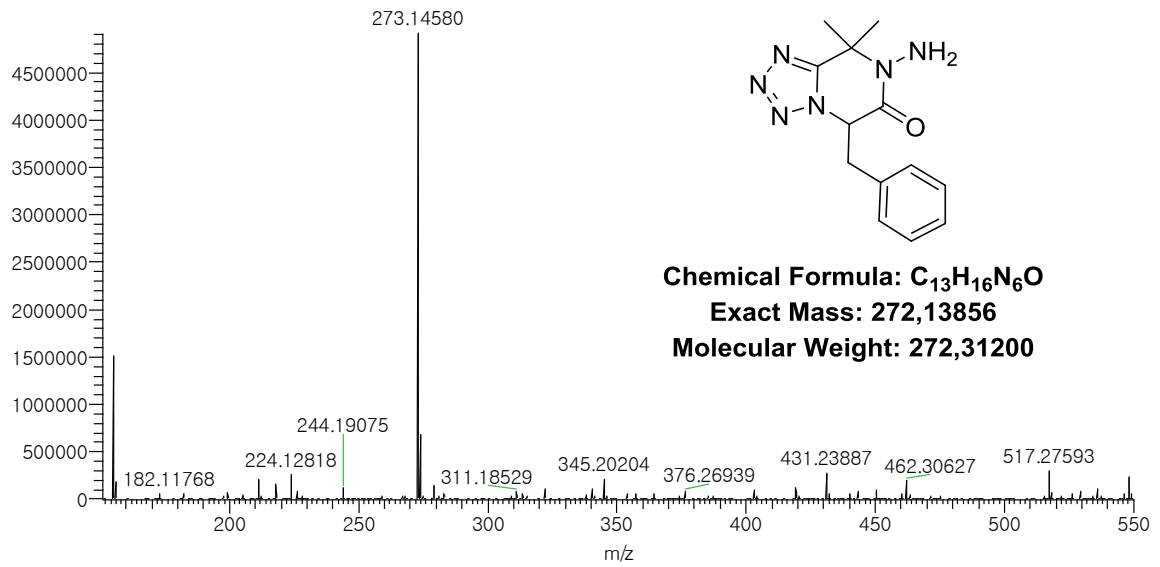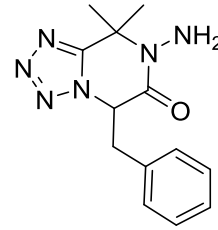

**Chemical Formula: C<sub>13</sub>H<sub>16</sub>N<sub>6</sub>O**

**Exact Mass: 272,13856**

**Molecular Weight: 272,31200**

**6i:7'-amino-5'-benzyl-5'H-spiro[cyclohexane-1,8'-tetrazolo[1,5-a] pyrazin] -6'(7'H)-one**

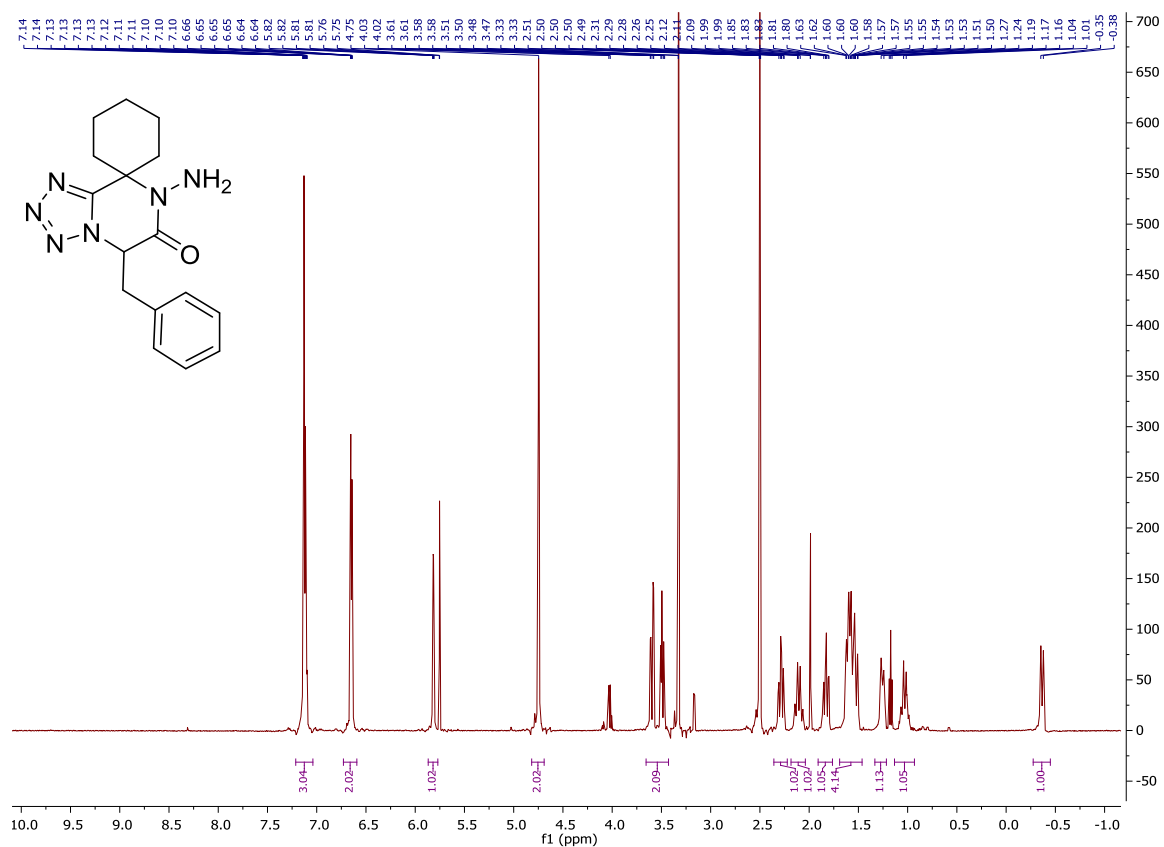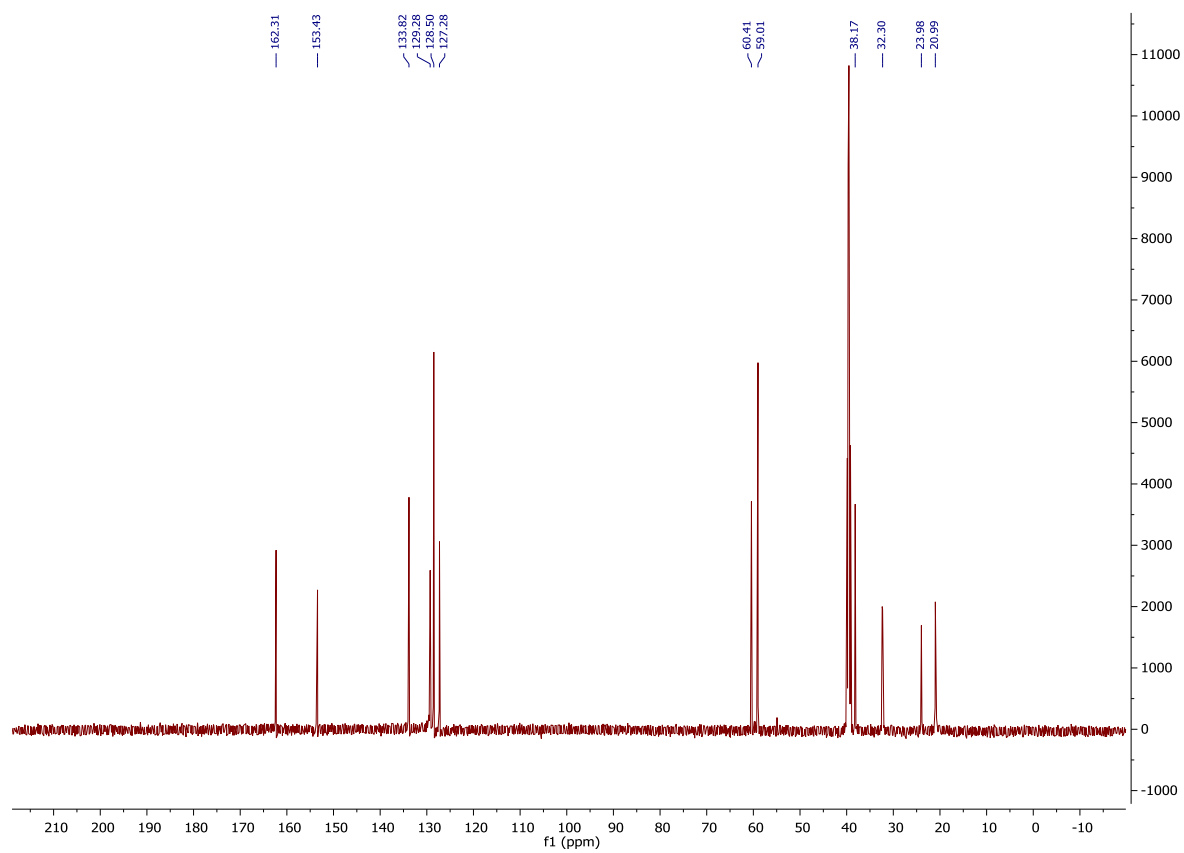

119a\_ 161130130627 #10-15 RT: 0.174  
T: FTMS + p ESI Full ms [150.00-750.00]

/: 6 NL: 1.55E7

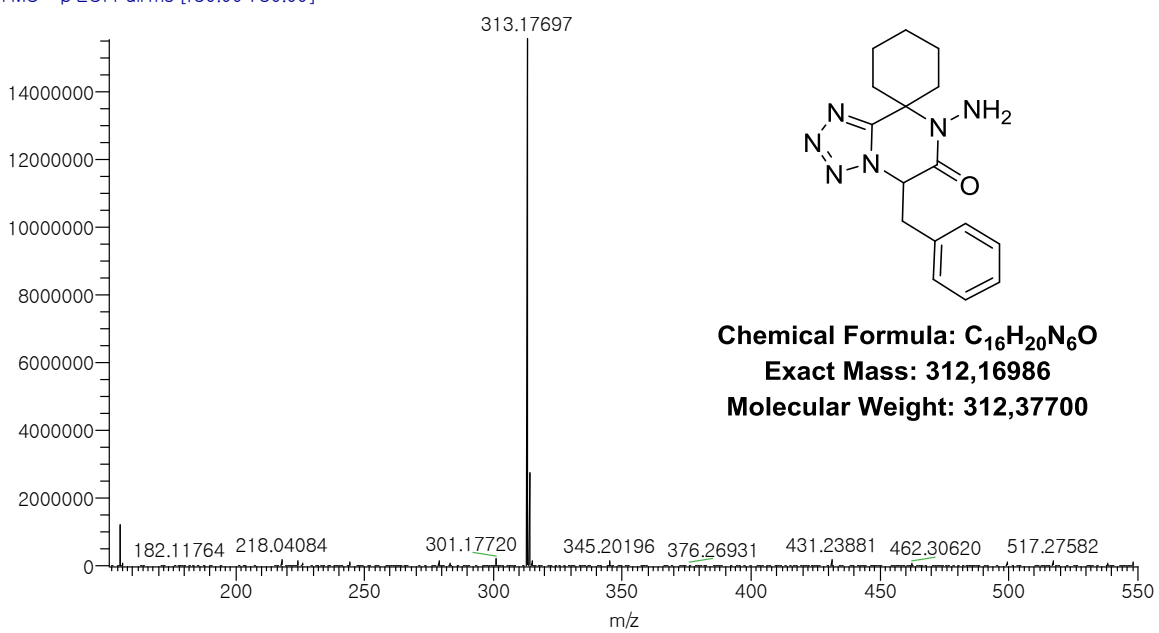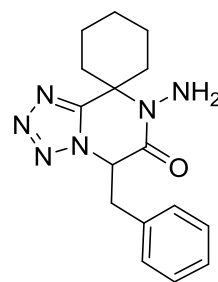

**Chemical Formula: C<sub>16</sub>H<sub>20</sub>N<sub>6</sub>O**  
**Exact Mass: 312,16986**  
**Molecular Weight: 312,37700**



**7i: 5'-benzyl-7',8'-dihydrospiro[cyclohexane-1,9'-tetrazolo[5,1-d][1,2,5] triazepin]-6'(5'H)-one**

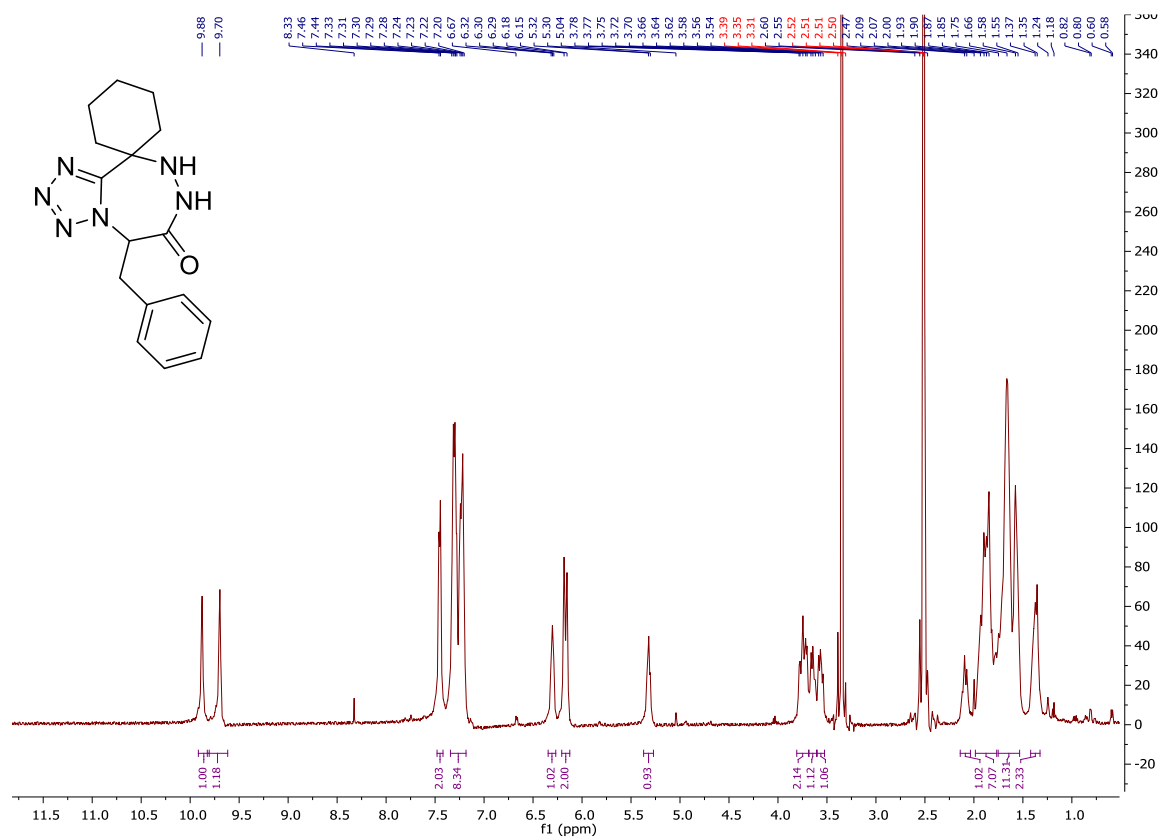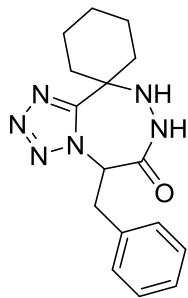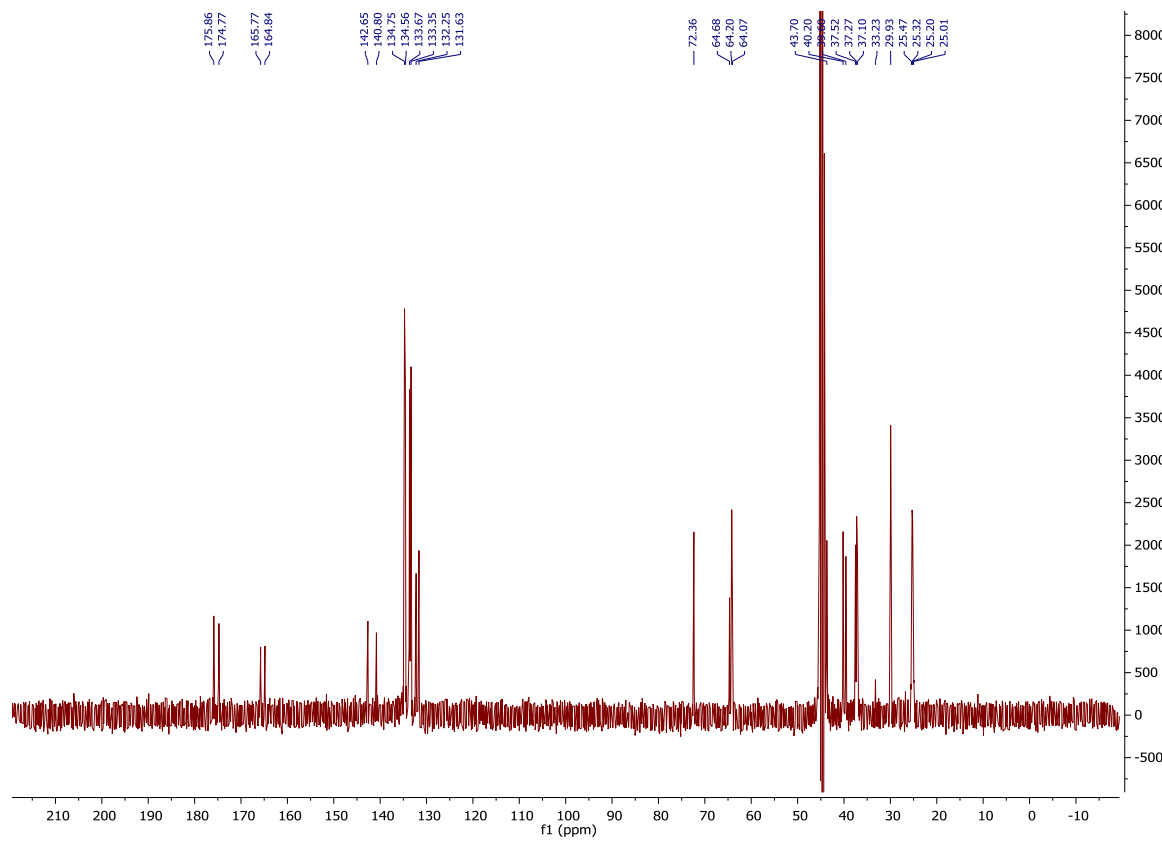

119b #10-15 RT: 0.17457-0.25068 AV:  
T: FTMS + p ESI Full ms [150.00-750.00]

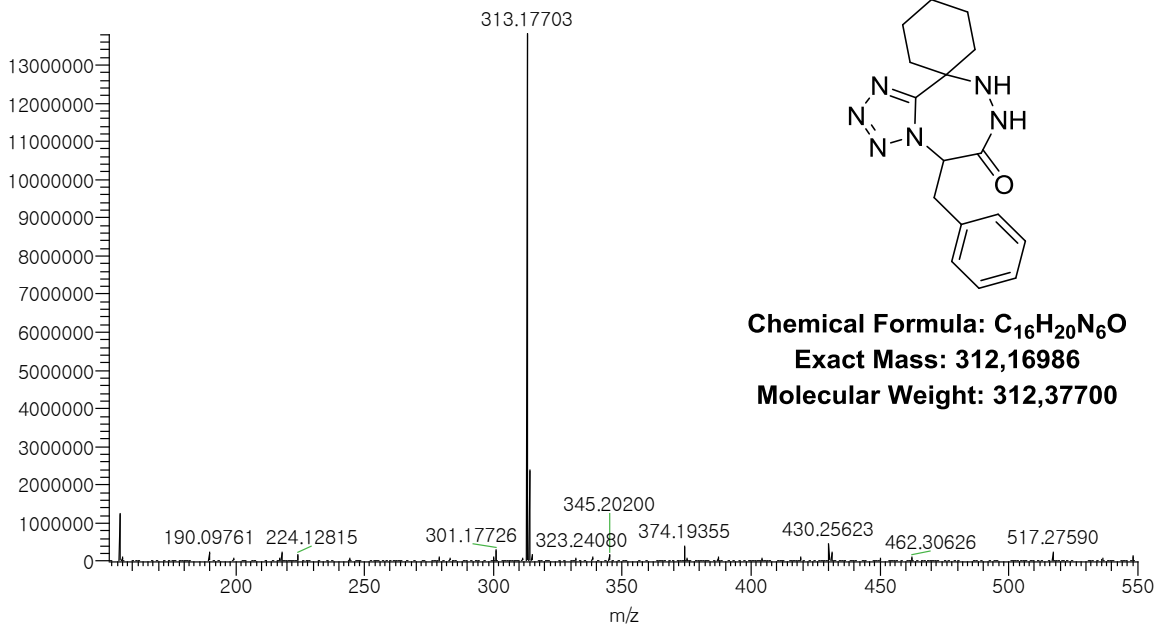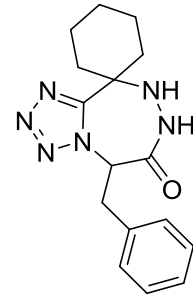

**Chemical Formula: C<sub>16</sub>H<sub>20</sub>N<sub>6</sub>O**  
**Exact Mass: 312,16986**  
**Molecular Weight: 312,37700**

**6j: 7'-amino-5'-benzyl-5'*H*-spiro[cyclopentane-1,8'-tetrazolo[1,5-*a*] pyrazine]-6'(7'*H*)-one**

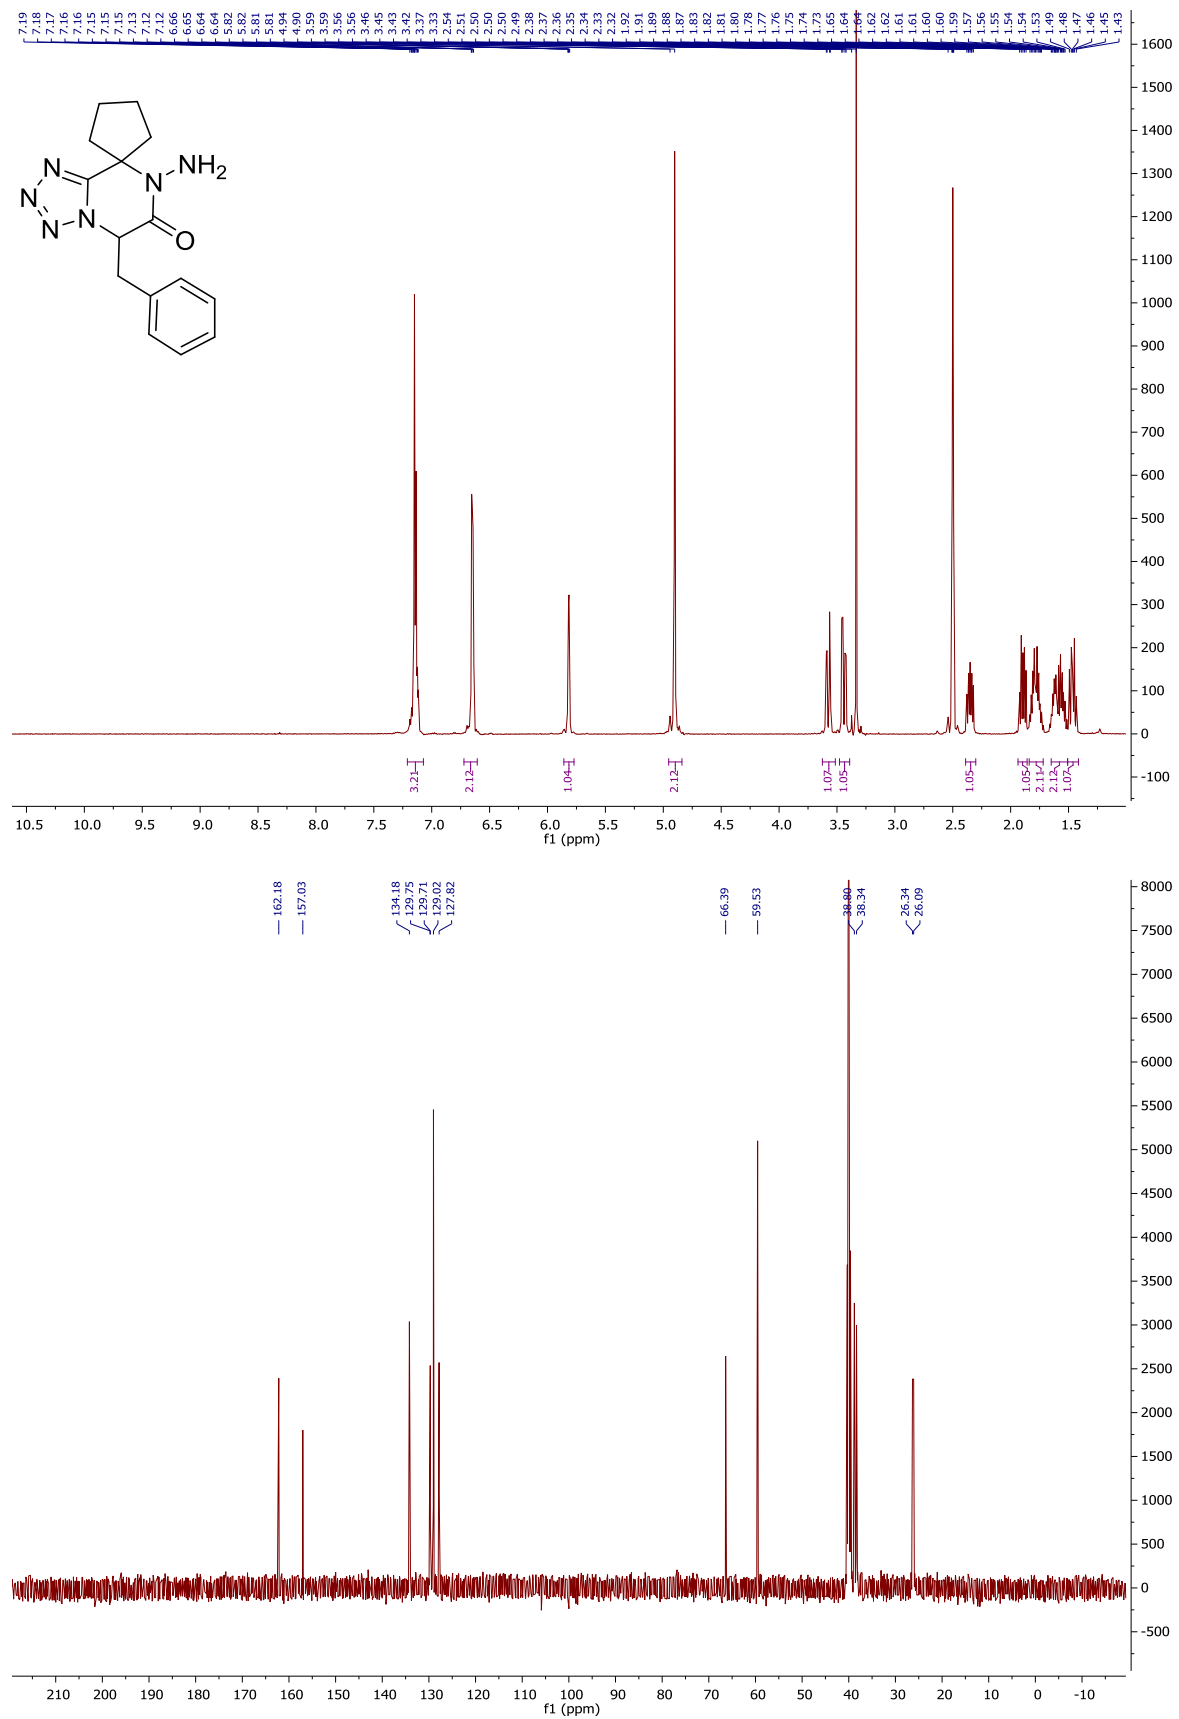

124a #10-15 RT: 0.17475-0.25571 AV:  
T: FTMS + p ESI Full ms [150.00-750.00]

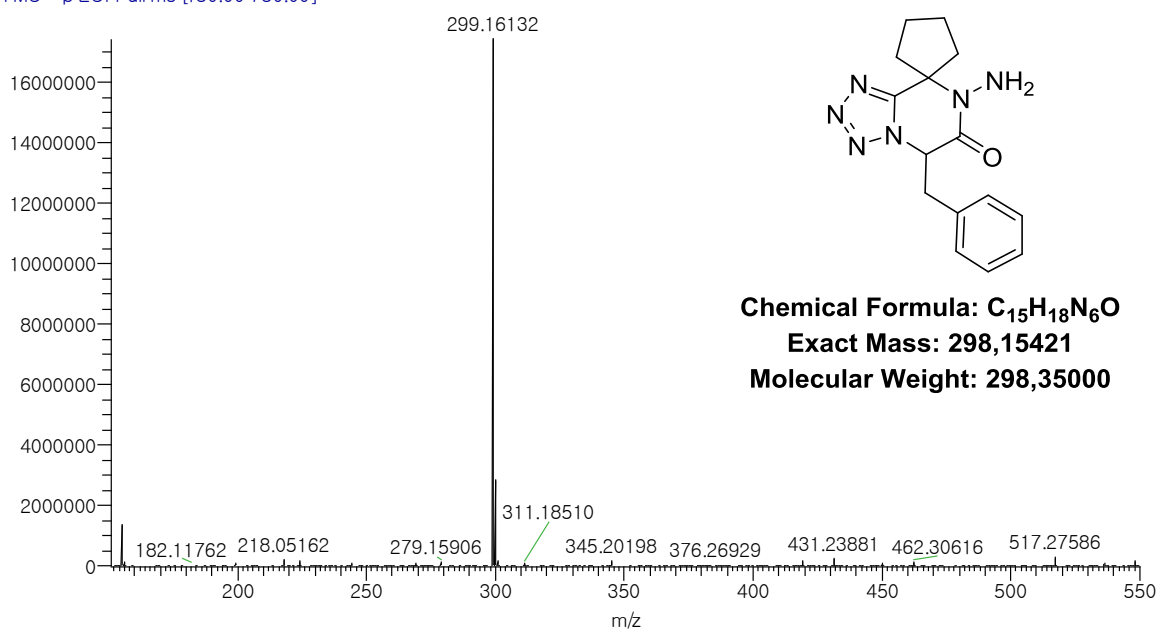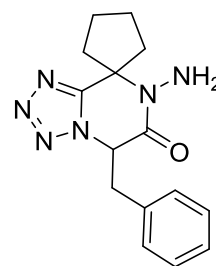

**Chemical Formula: C<sub>15</sub>H<sub>18</sub>N<sub>6</sub>O**

**Exact Mass: 298,15421**

**Molecular Weight: 298,35000**



121b #9-14 RT: 0.17339-0.25455 AV: 6  
T: FTMS + p ESI Full ms [150.00-750.00]

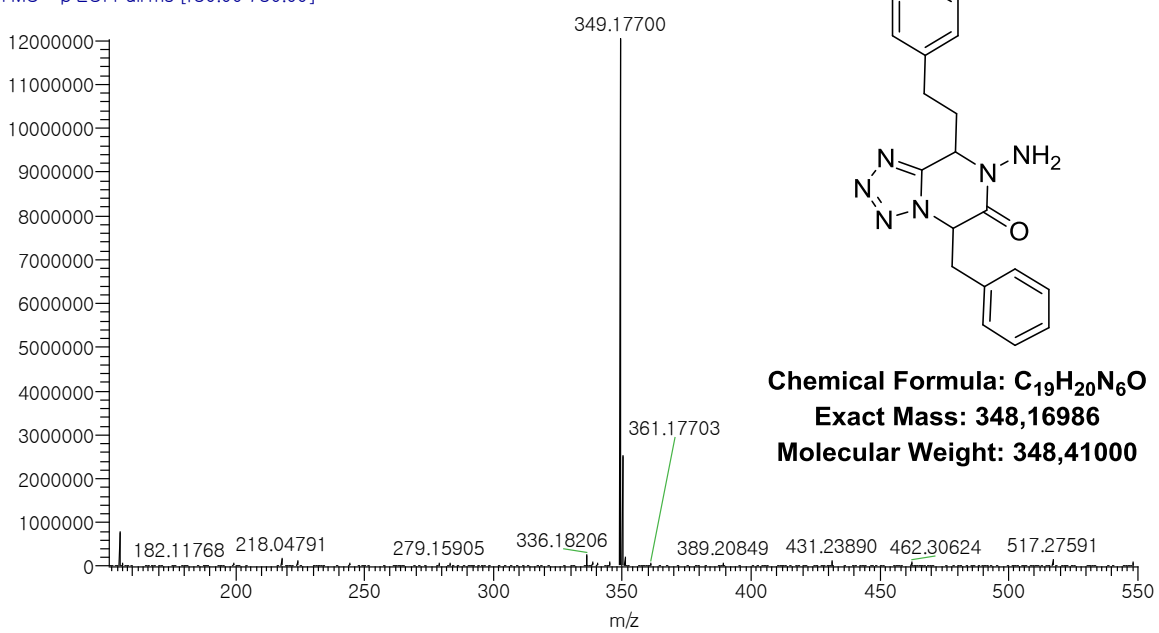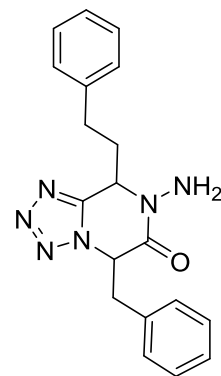

**Chemical Formula: C<sub>19</sub>H<sub>20</sub>N<sub>6</sub>O**  
**Exact Mass: 348,16986**  
**Molecular Weight: 348,41000**

**6l: 7-amino-5-benzyl-8-isopropyl-7,8-dihydro-tetrazolo[1,5-a]pyrazin-6(5H)-one**

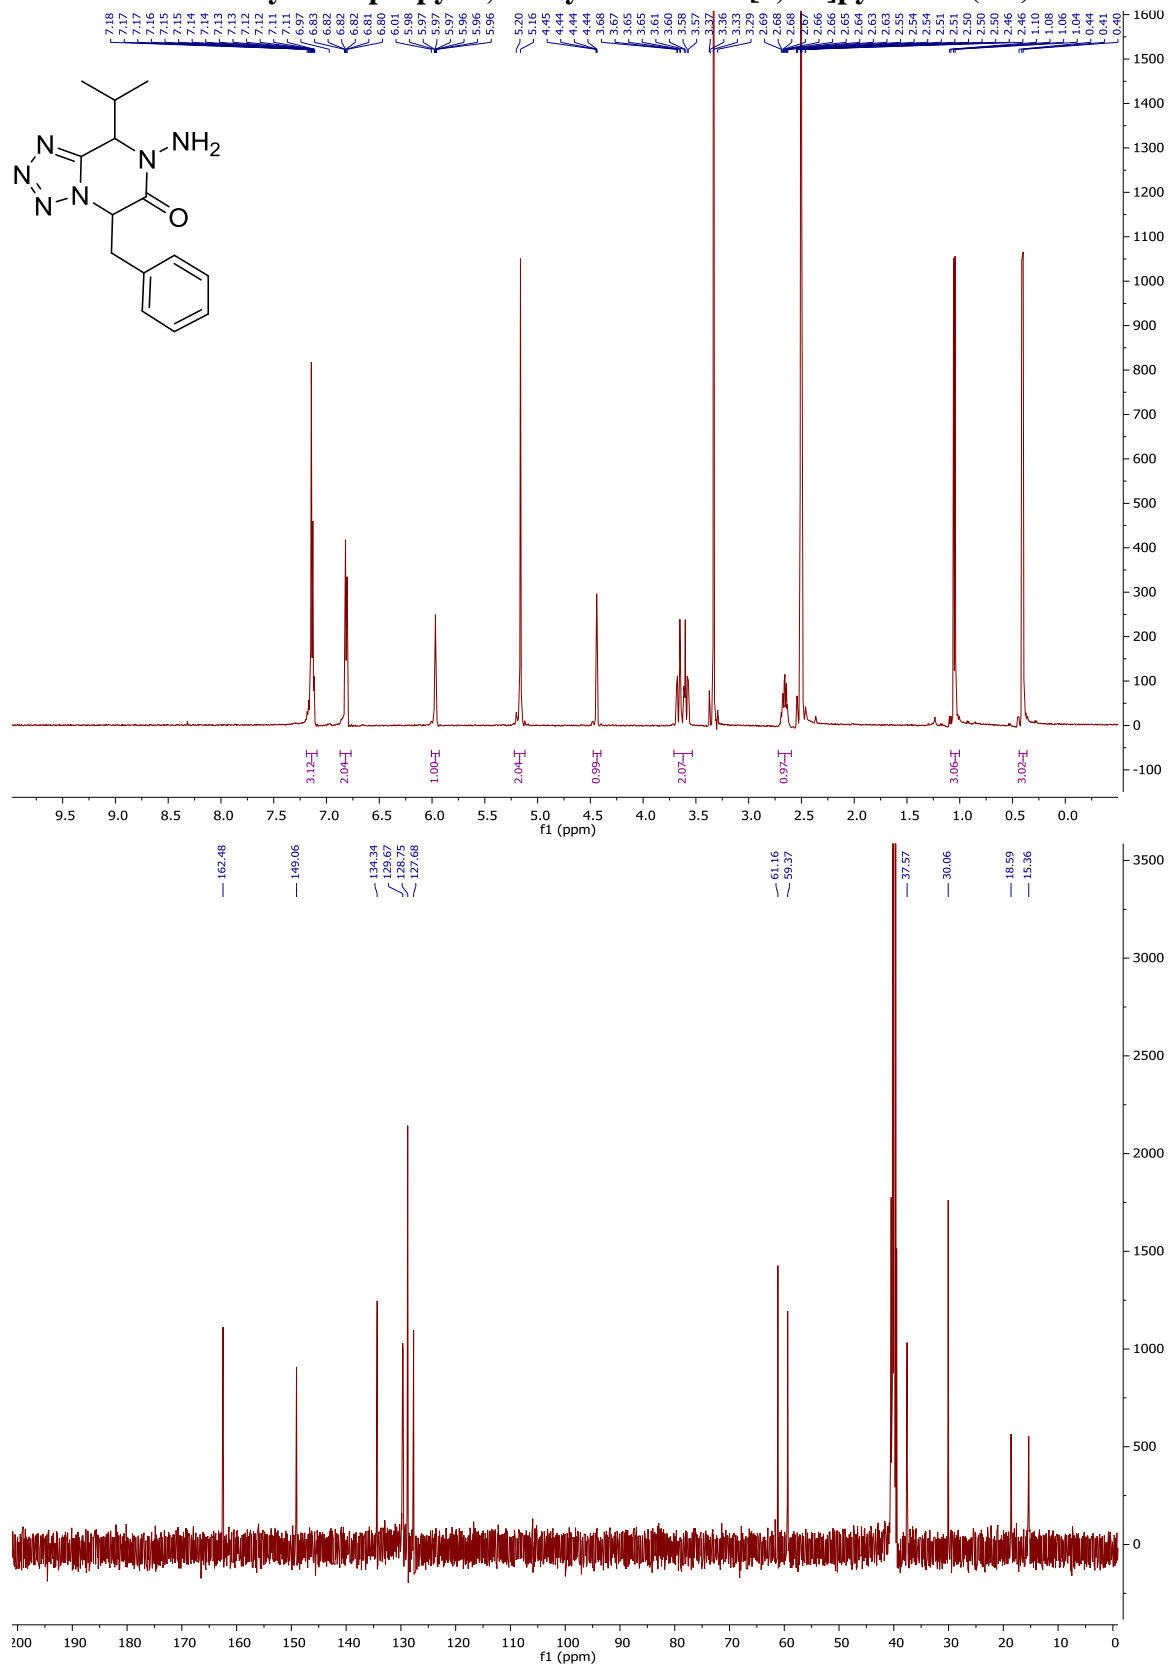

122a #10-15 RT: 0.17562-0.25247 AV: 6 INL: 0.99E0  
T: FTMS +p ESI Full ms [150.00-750.00]

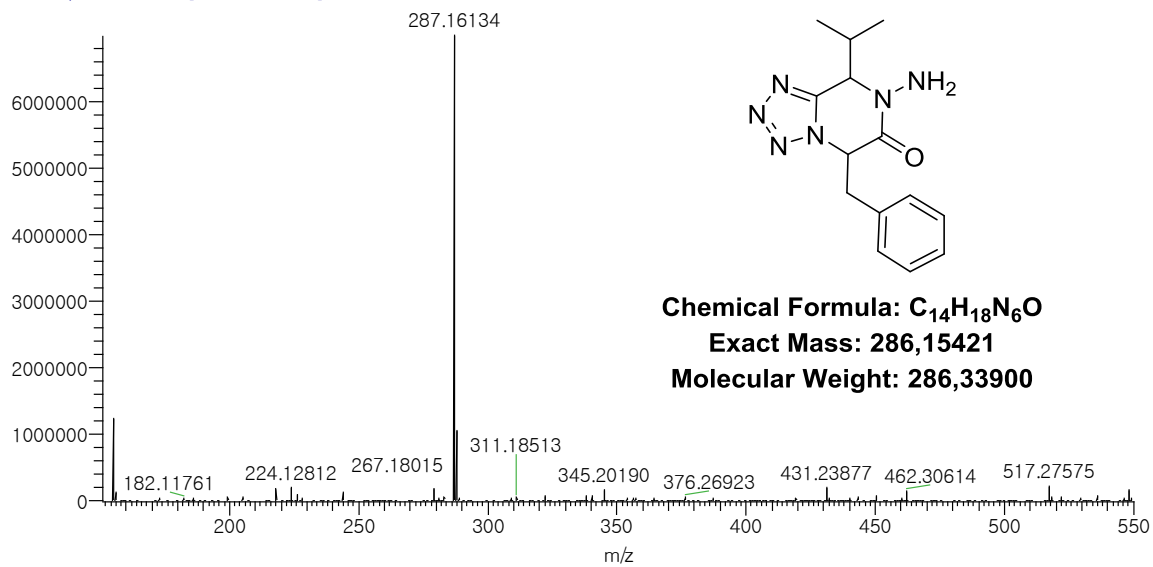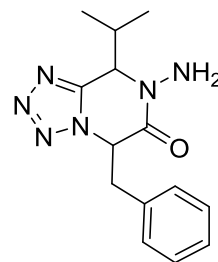

**Chemical Formula: C<sub>14</sub>H<sub>18</sub>N<sub>6</sub>O**

**Exact Mass: 286,15421**

**Molecular Weight: 286,33900**



**6m: 7-amino-5-isopropyl-8,8-dimethyl-7,8-dihydro-1,5-a-pyrazin-6(5H)-one**

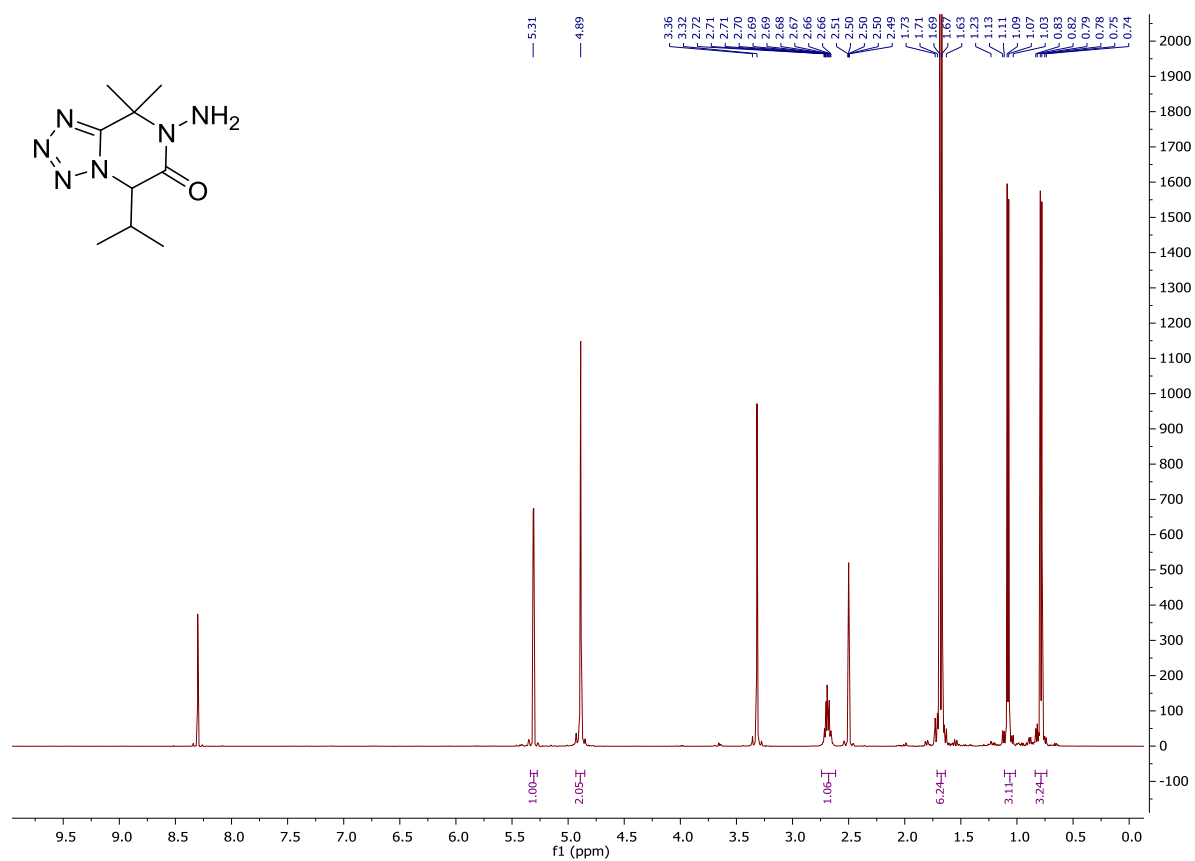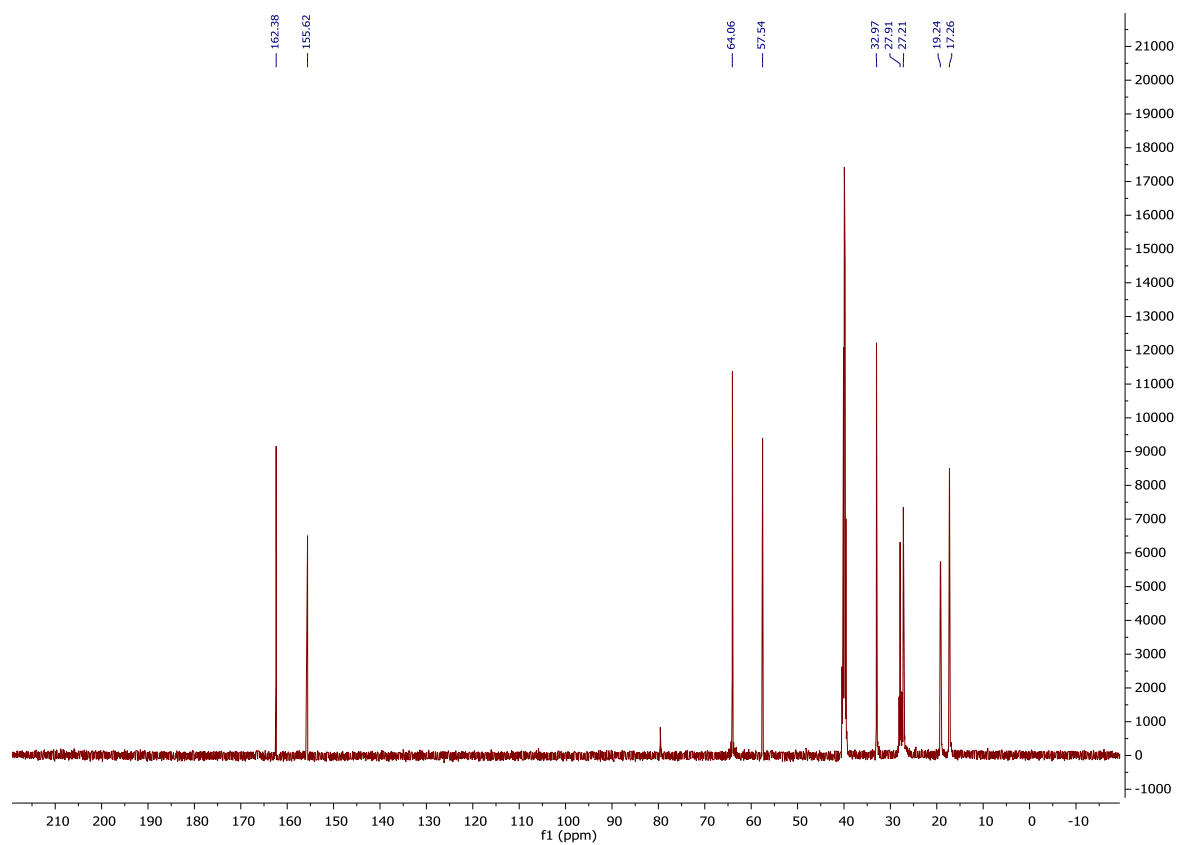

128 #10-15 RT: 0.17486-0.25062 AV: 6 NL: 1./ /E /  
T: FTMS +p ESI Full ms [150.00-750.00]

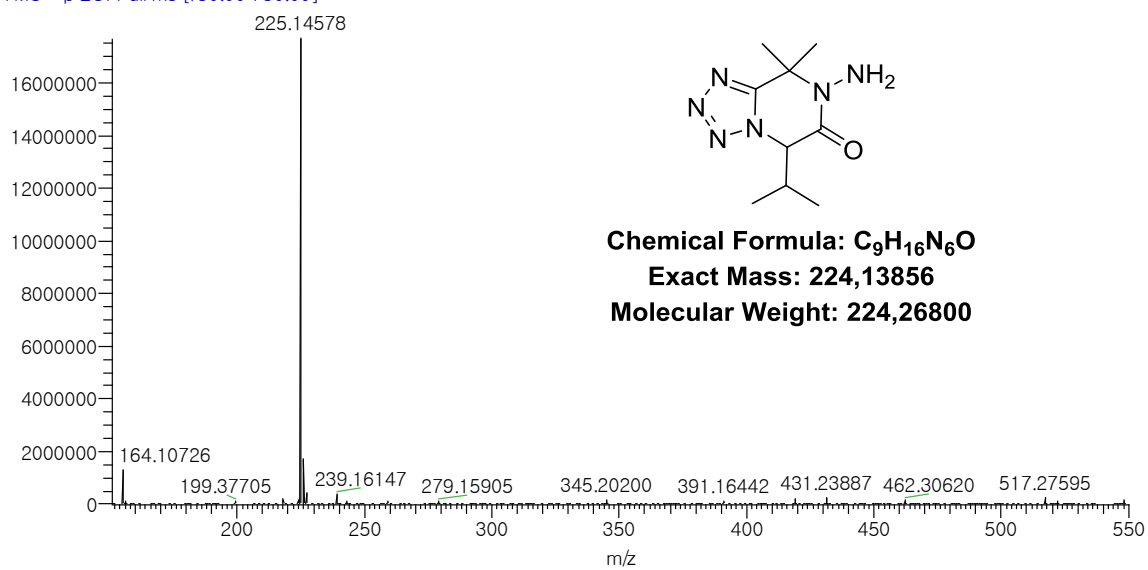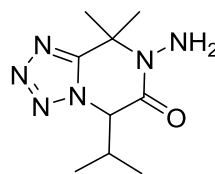

**Chemical Formula: C<sub>9</sub>H<sub>16</sub>N<sub>6</sub>O**

**Exact Mass: 224,13856**

**Molecular Weight: 224,26800**

**7n: 5'-isopropyl-7',8'-dihydrospiro[cyclohexane-1,9'-tetrazolo[5,1-d][1,2,5] triazepin]-6'(5*H*)-one**

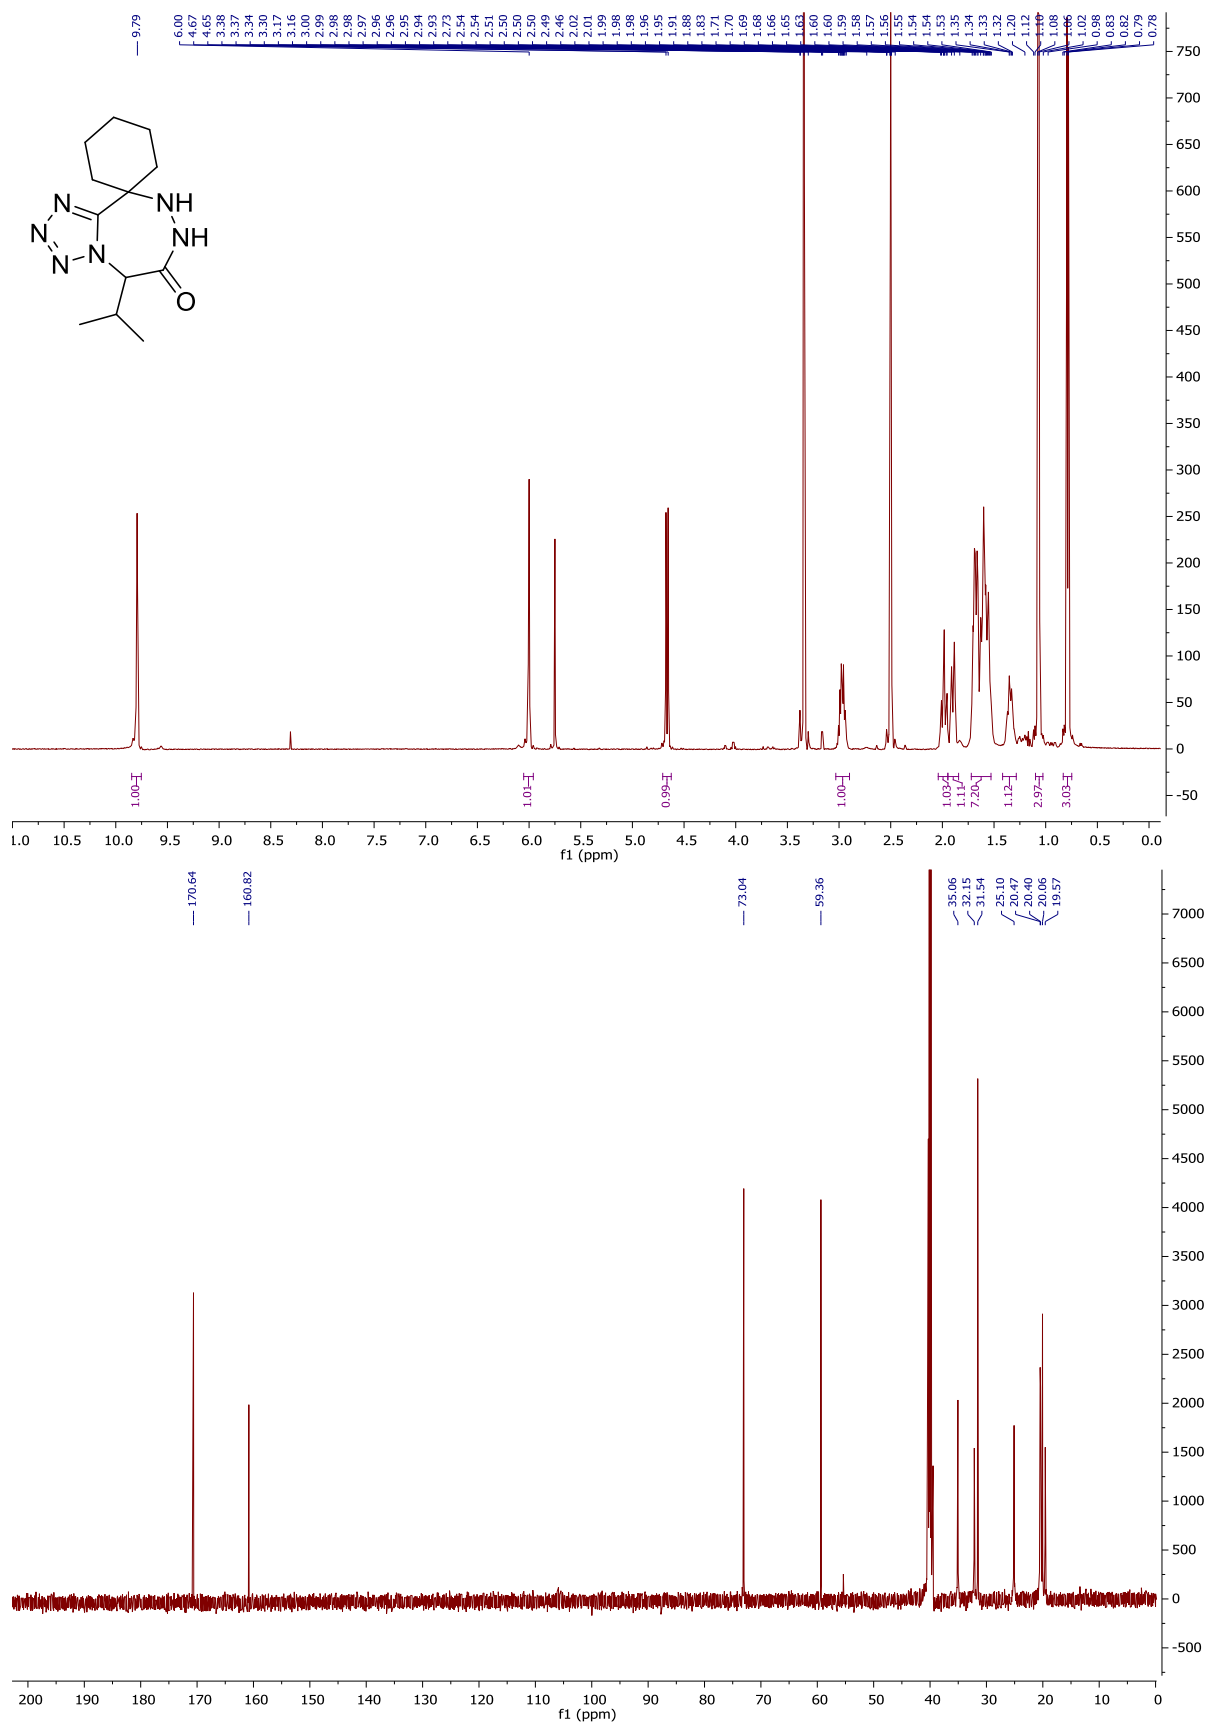

127 #10-15 RT: 0.17527-0.25638 AV: 6  
T: FTMS + pESI Full ms [150.00-750.00]

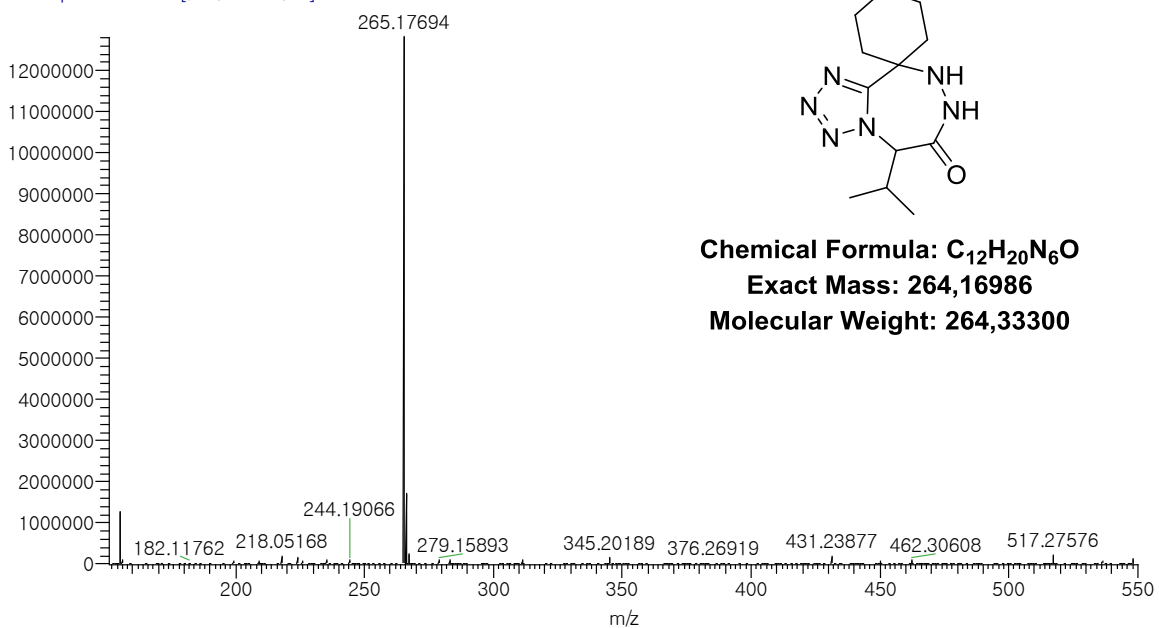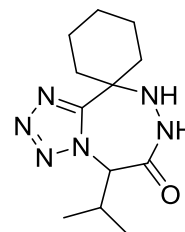

**Chemical Formula: C<sub>12</sub>H<sub>20</sub>N<sub>6</sub>O**  
**Exact Mass: 264,16986**  
**Molecular Weight: 264,33300**

**6o: 7'-amino-5'-isopropyl-5'*H*-spiro[cyclopentane-1,8'-tetrazolo[1,5-*a*] pyrazin]-6'(7'*H*)-one**

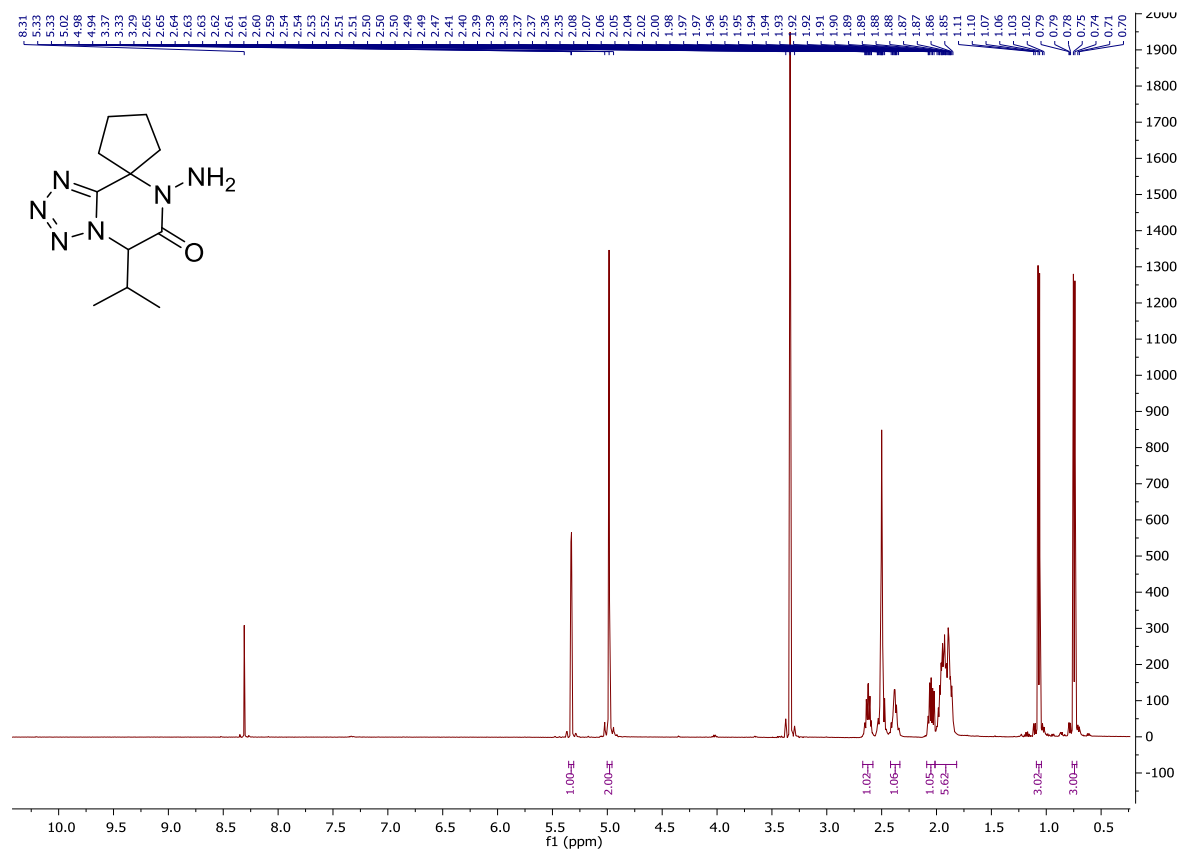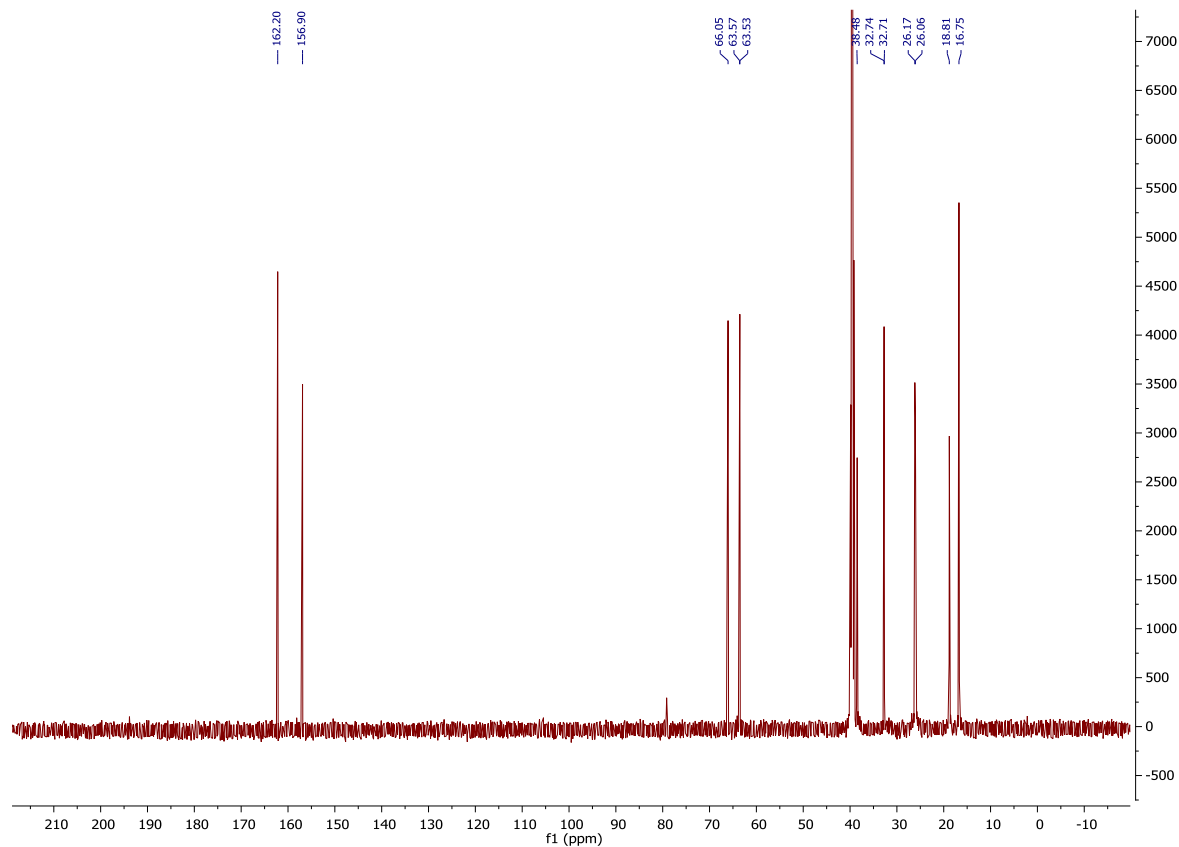

126a #10-15 RT: 0.17547-0.25204 AV:  
T: FTMS + pESI Full ms [150.00-750.00]

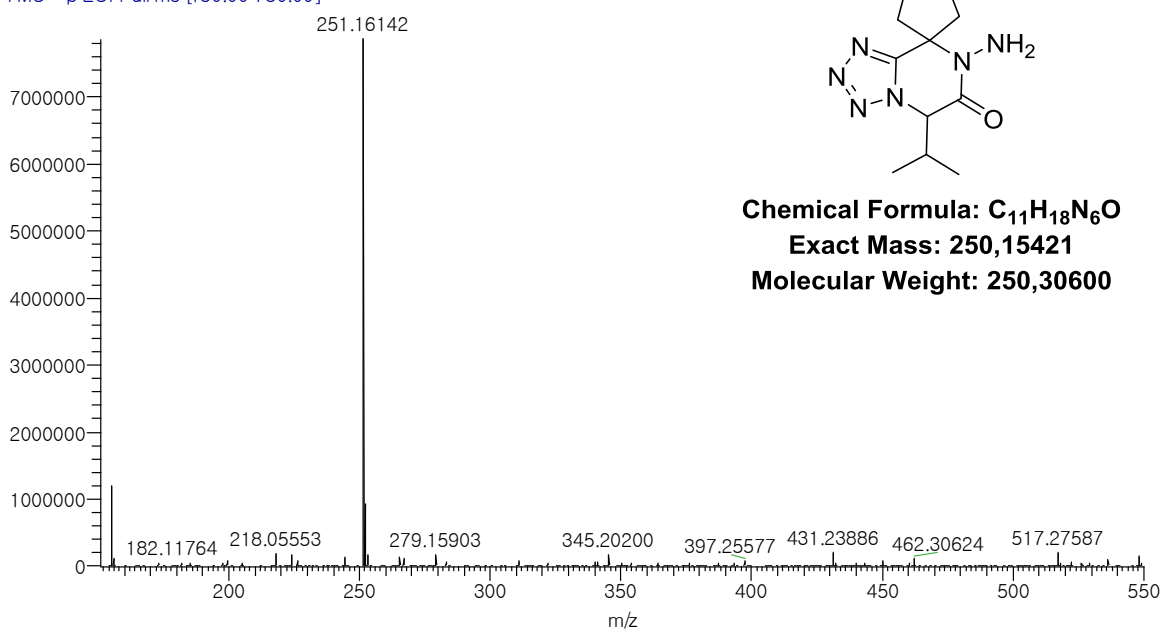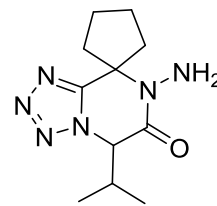

**Chemical Formula: C<sub>11</sub>H<sub>18</sub>N<sub>6</sub>O**

**Exact Mass: 250,15421**

**Molecular Weight: 250,30600**

**7o: 5'-isopropyl-7',8'-dihydrospiro[cyclopentane-1,9'-tetrazolo[5,1-d][1,2,5] triazepin]-6'(5' H)-one**

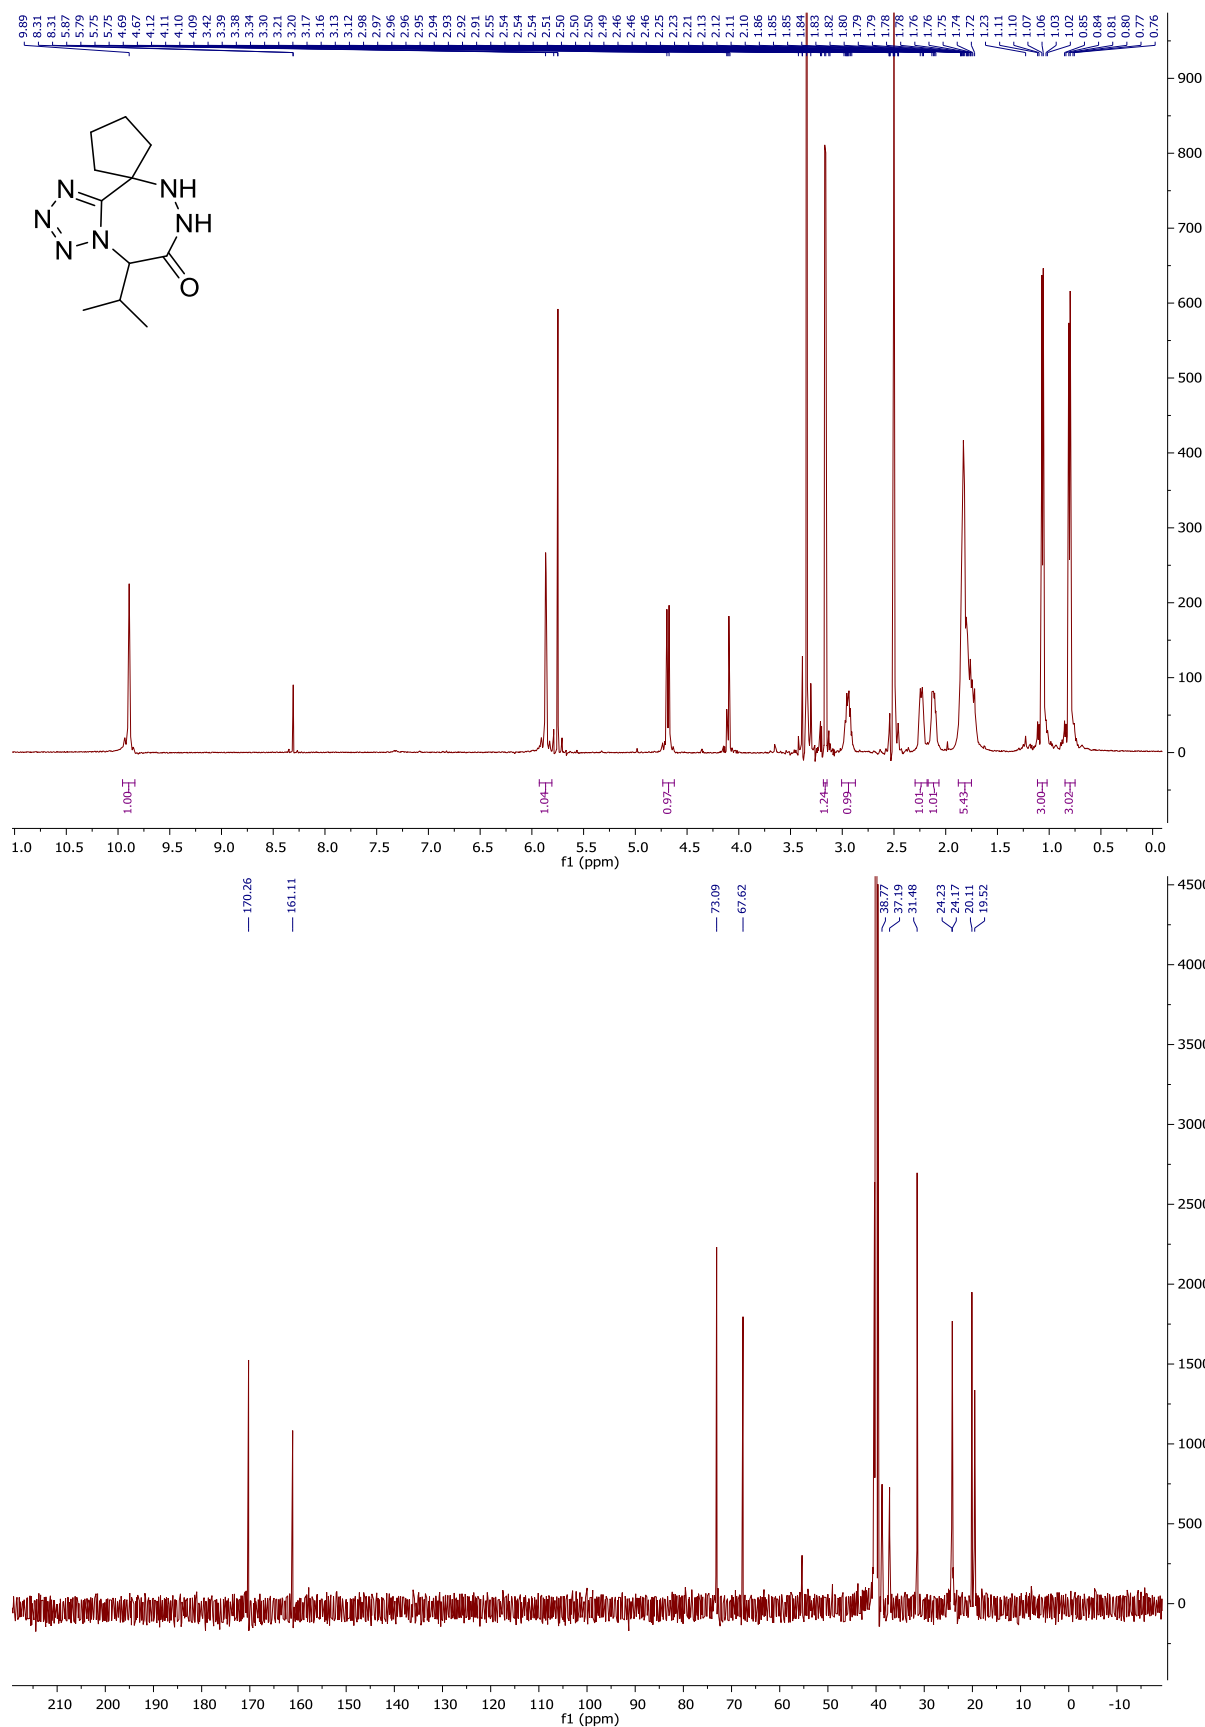

126b #10-15 RT: 0.17654-0.25426 AV:  
T: FTMS + p ESI Full ms [150.00-750.00]

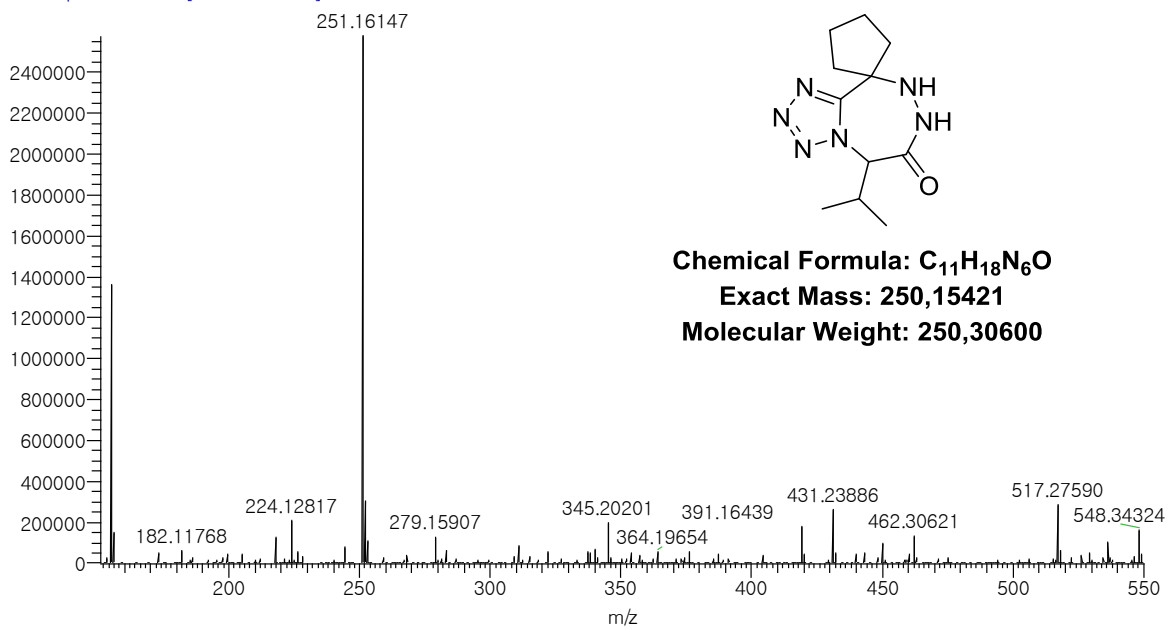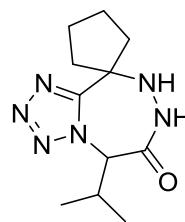

**Chemical Formula: C<sub>11</sub>H<sub>18</sub>N<sub>6</sub>O**

**Exact Mass: 250,15421**

**Molecular Weight: 250,30600**



**5a: *tert*-butyl 2-(2-(1-(1-methoxy-4-methyl-1-oxopentan-2-yl)-1*H*-tetrazol-5-yl)propan-2-yl)hydrazine-1-carboxylate**

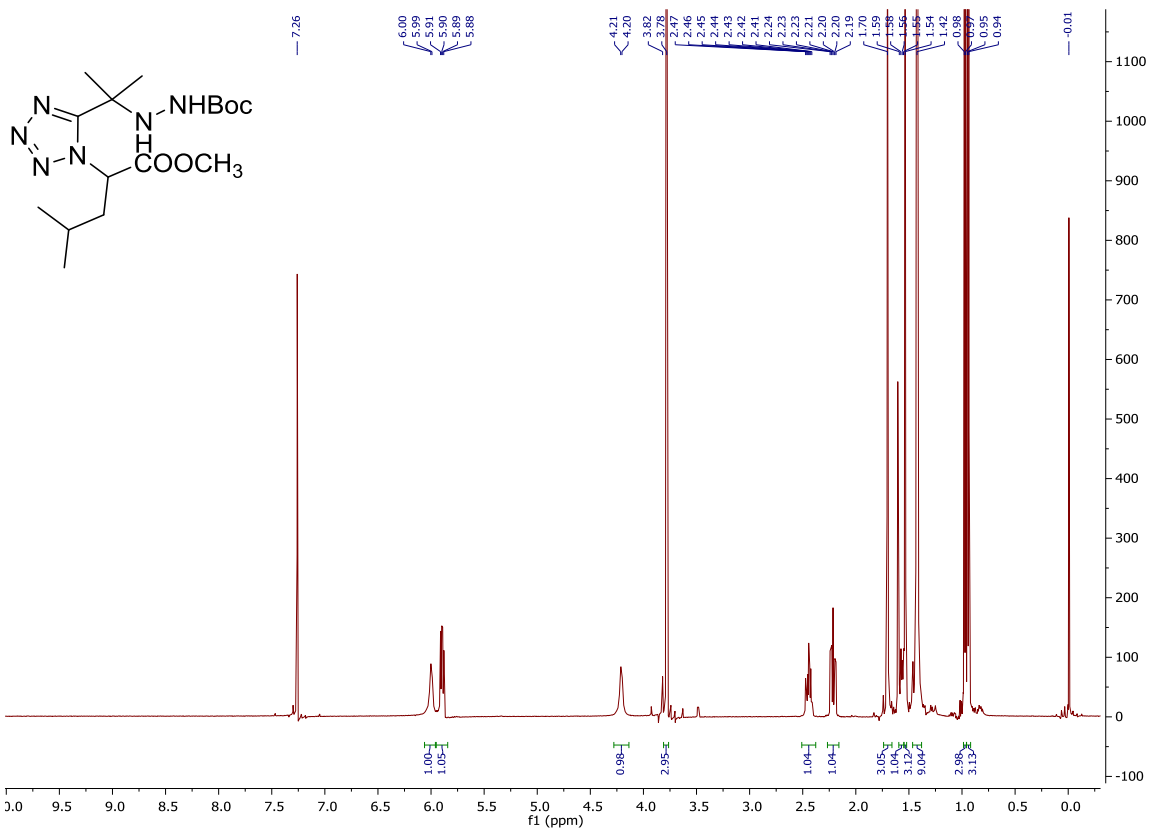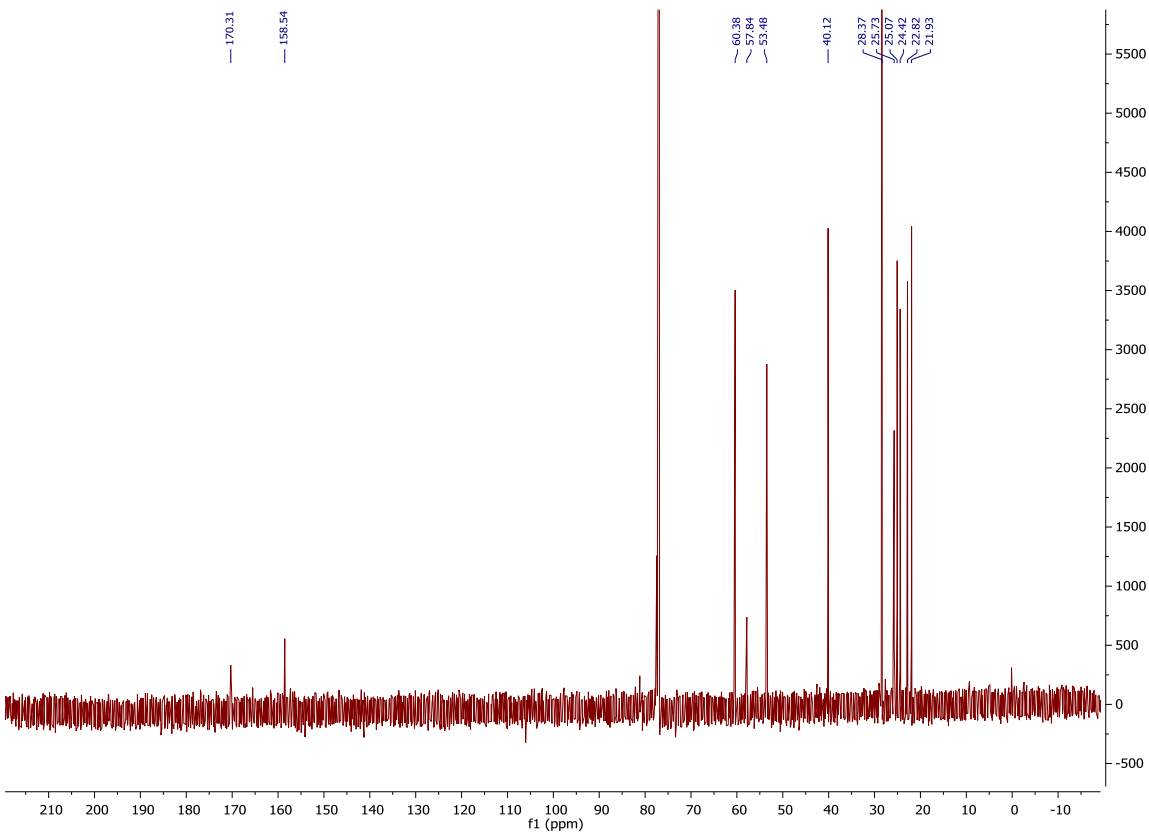

140ugi #10-15 RT: 0.17210-0.25878 AV  
T: FTMS + p ESI Full ms [150.00-750.00]

7

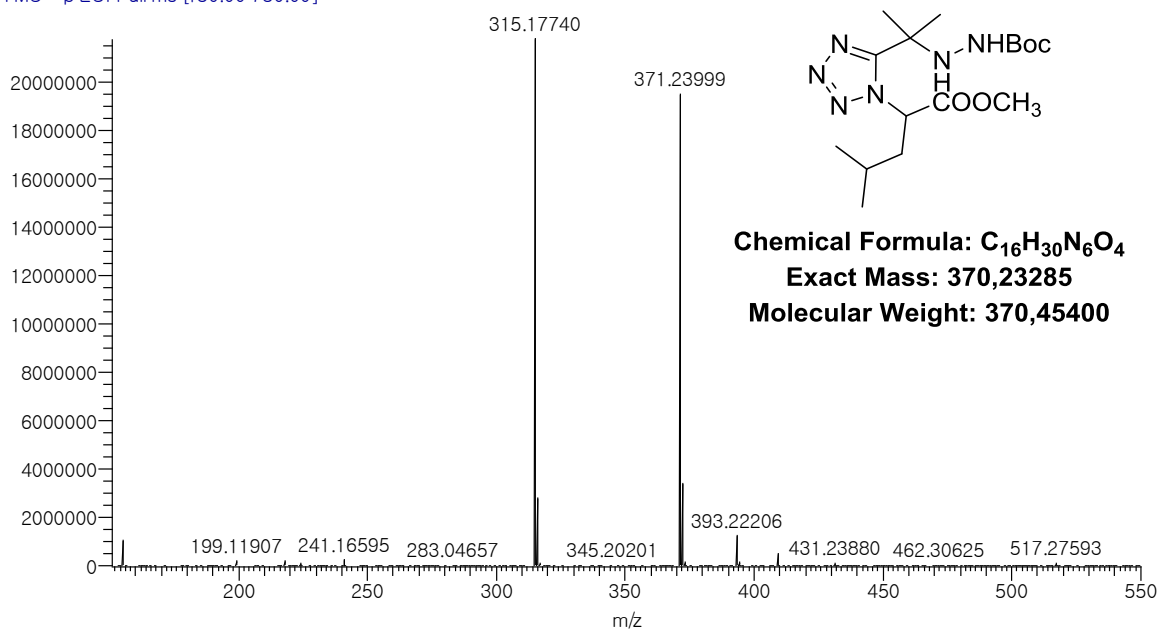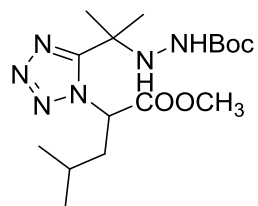

**Chemical Formula: C<sub>16</sub>H<sub>30</sub>N<sub>6</sub>O<sub>4</sub>**  
**Exact Mass: 370,23285**  
**Molecular Weight: 370,45400**

**8a: *tert*-butyl (5-isobutyl-8,8-dimethyl-6-oxo-5,6-dihydro-1,2,4-triazolo[1,5-a]pyrazin-7(8H)-yl) carbamate**

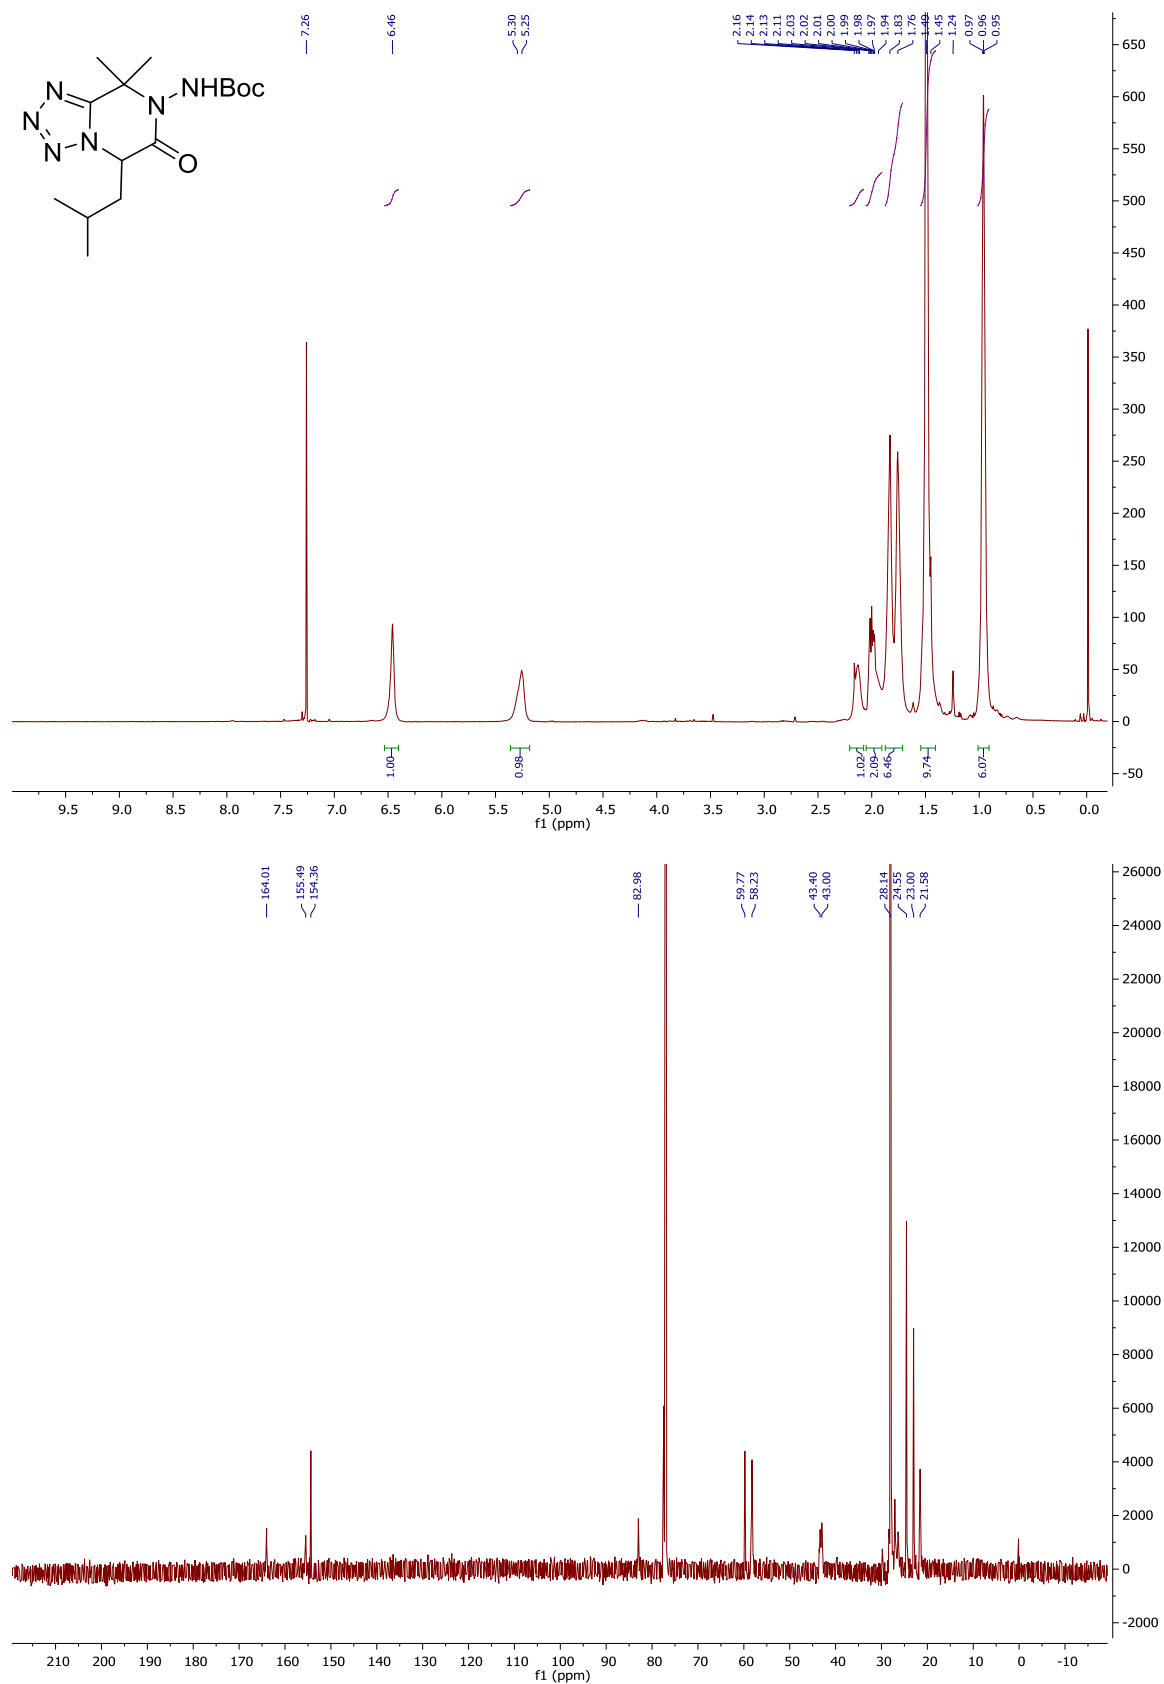

140boc #10-15 RT: 0.17400-0.26029 A'  
T: FTMS + p ESI Full ms [150.00-750.00]

6

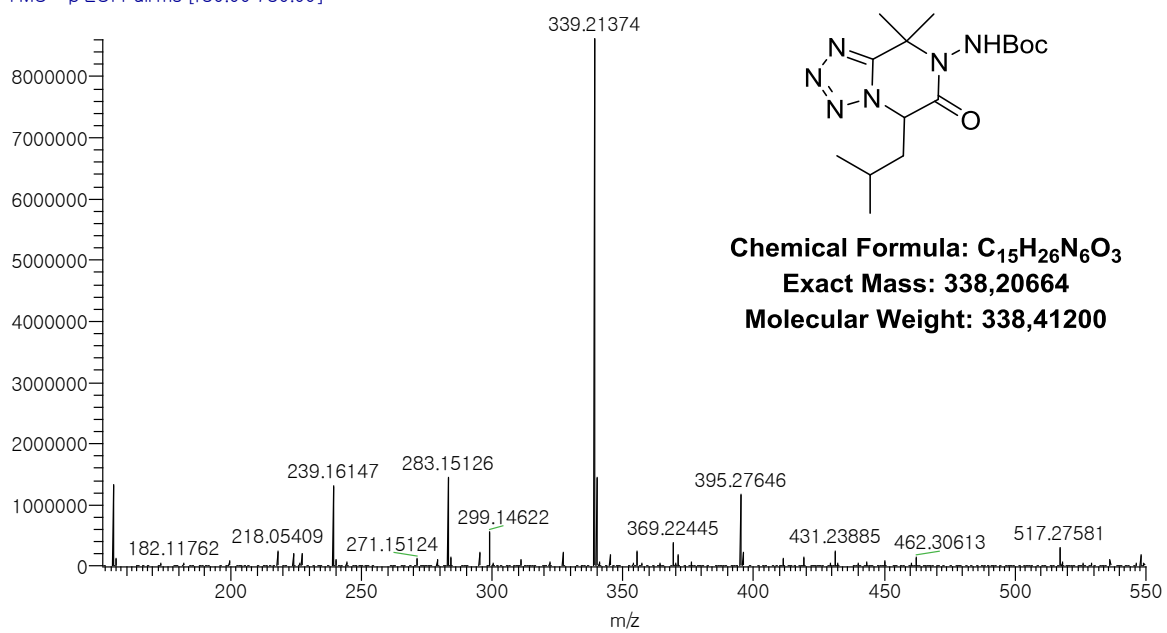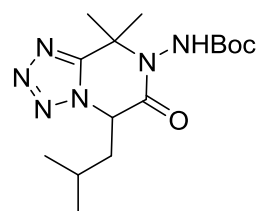

**Chemical Formula: C<sub>15</sub>H<sub>26</sub>N<sub>6</sub>O<sub>3</sub>**  
**Exact Mass: 338,20664**  
**Molecular Weight: 338,41200**

**5b: tert-butyl 2-(1-(1-(1-methoxy-4-methyl-1-oxopentan-2-yl)-1H-tetrazol-5-yl)cyclohexyl) hydrazine-1-carboxylate**

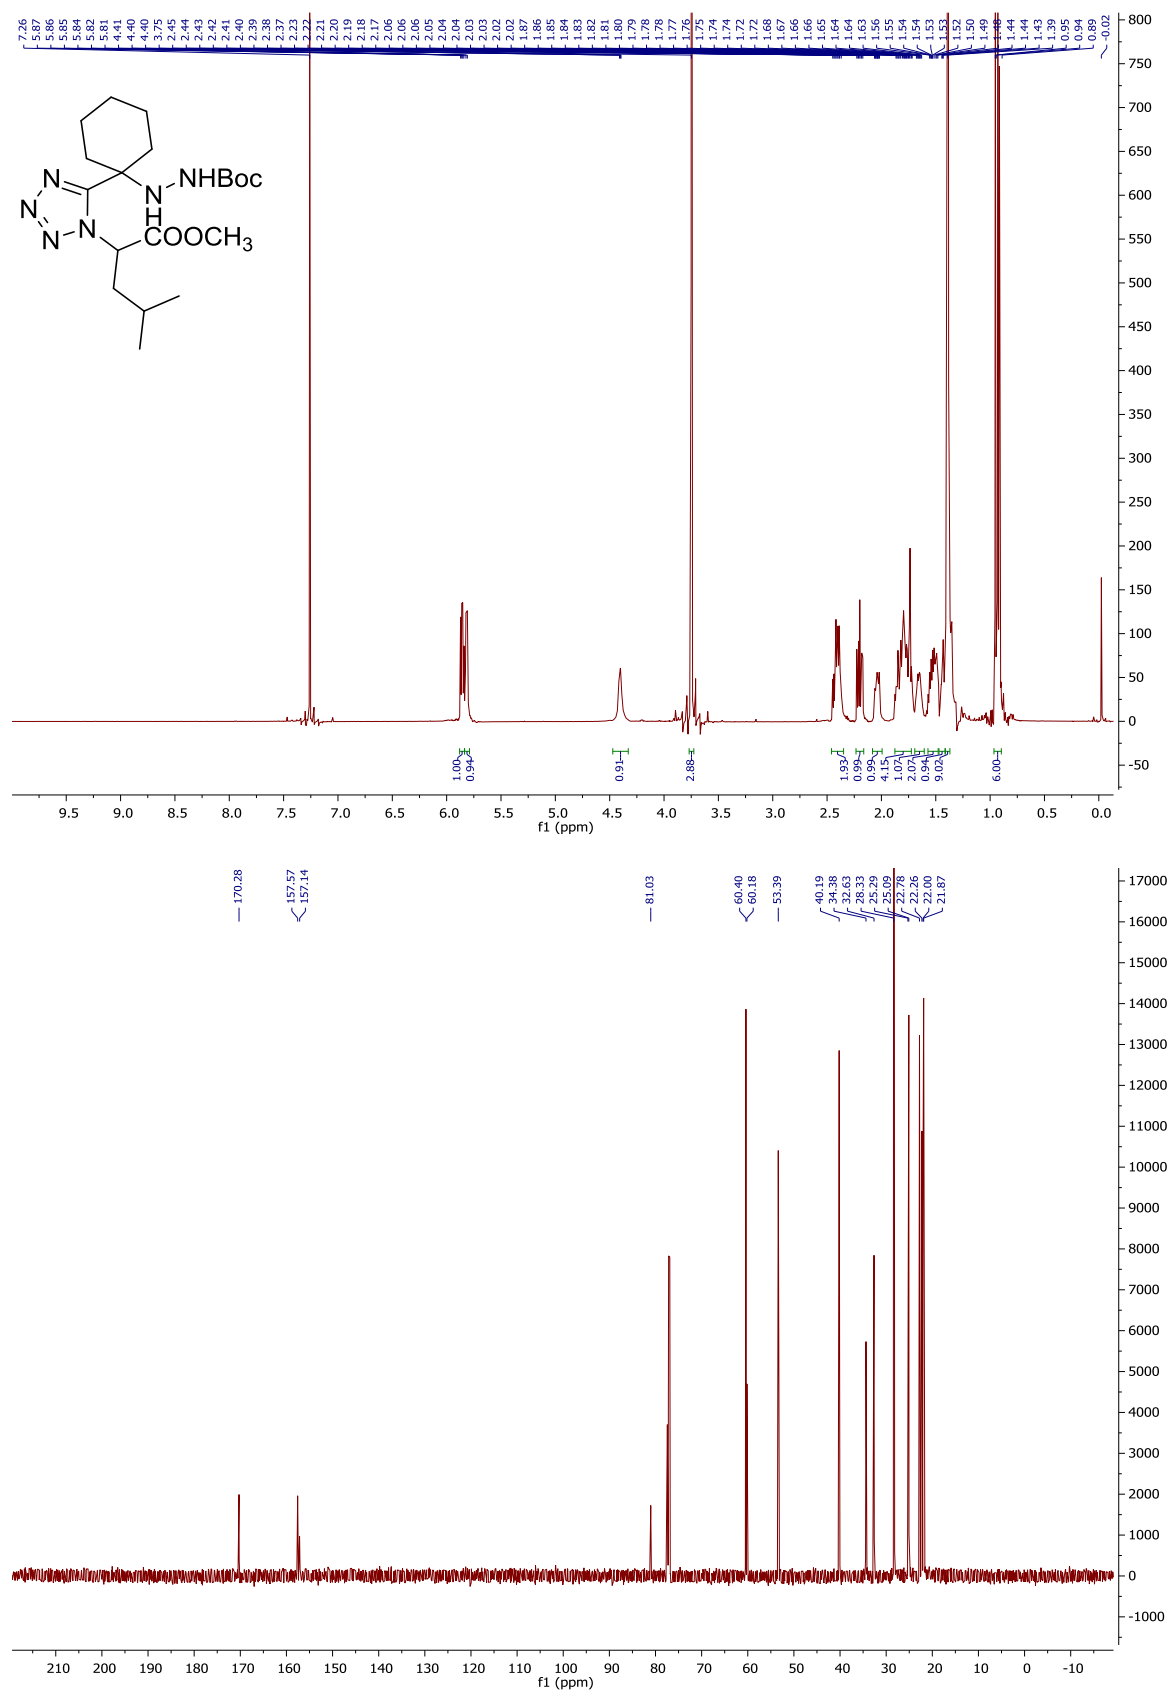

157ugi #26 RT: 0.44883 AV: 1 NL: 5.4  
T: FTMS + p ESI Full ms [150.00-750.00]

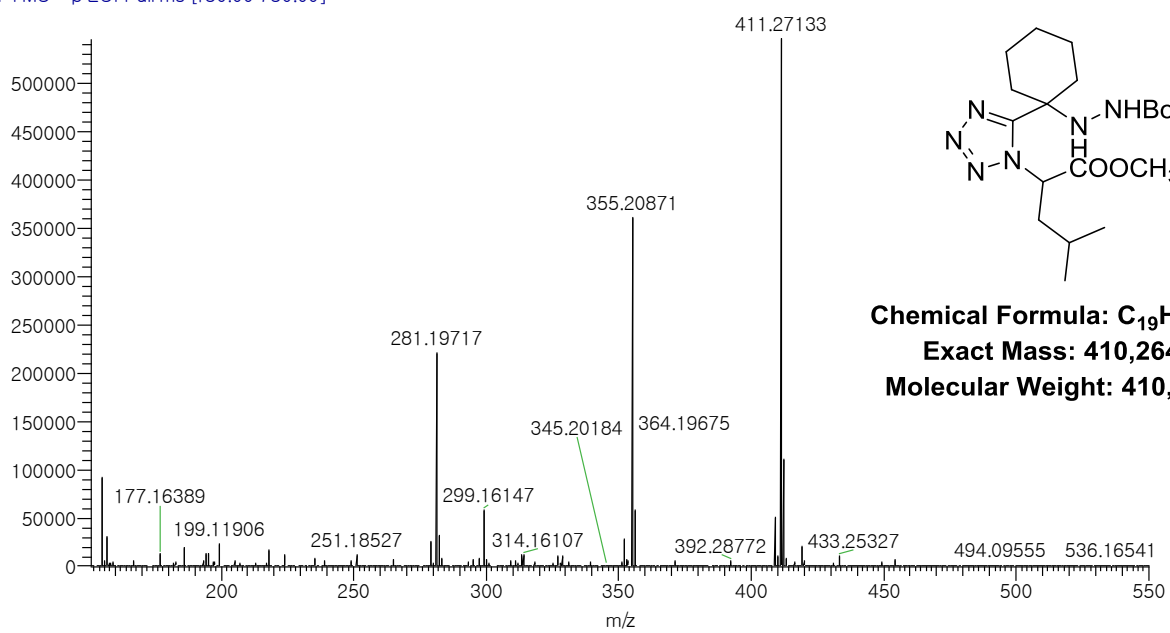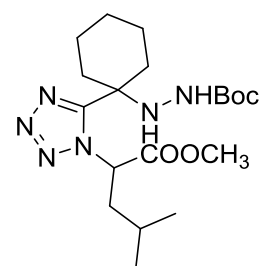

**Chemical Formula: C<sub>19</sub>H<sub>34</sub>N<sub>6</sub>O<sub>4</sub>**  
**Exact Mass: 410,26415**  
**Molecular Weight: 410,51900**

**8b: tert-butyl (5'-isobutyl-6'-oxo-5',6'-dihydro-7'H-spiro[cyclohexane-1,8'-tetrazolo[1,5-a] pyrazin]-7'-yl)carbamate**

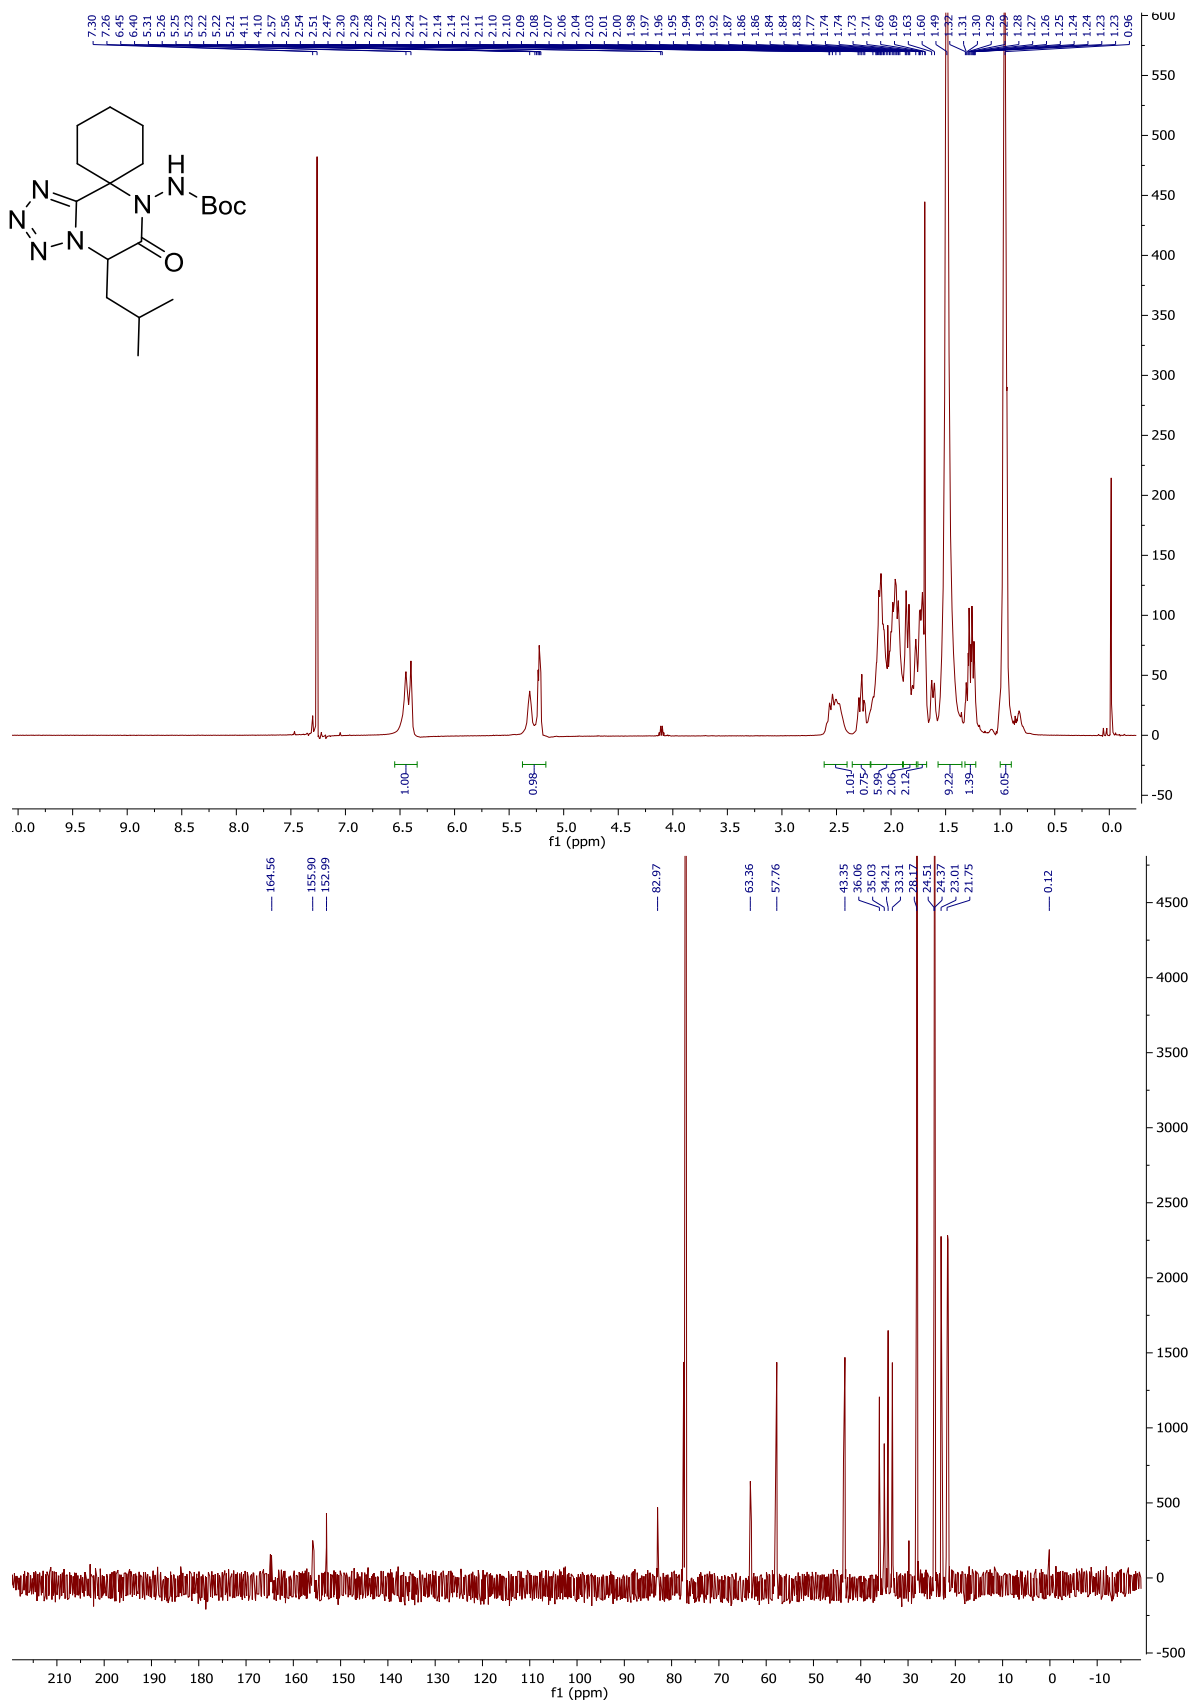

157boc #10-15 RT: 0.17503-0.25181 A'  
T: FTMS + p ESI Full ms [150.00-750.00]

6

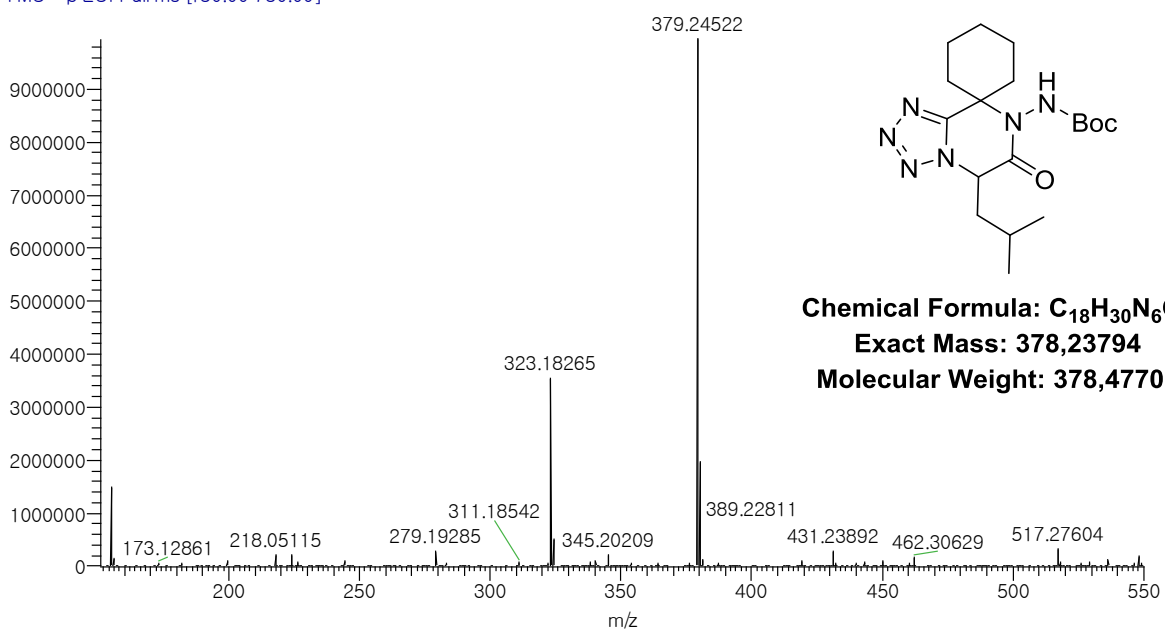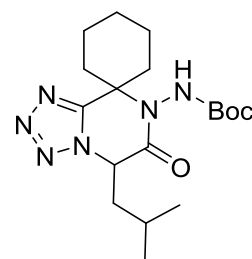

**Chemical Formula: C<sub>18</sub>H<sub>30</sub>N<sub>6</sub>O<sub>3</sub>**  
**Exact Mass: 378,23794**  
**Molecular Weight: 378,47700**



**5c: *tert*-butyl 2-(1-(1-(1-methoxy-4-methyl-1-oxopentan-2-yl)-1*H*-tetrazol-5-yl)cyclopentyl) hydrazine-1-carboxylate**

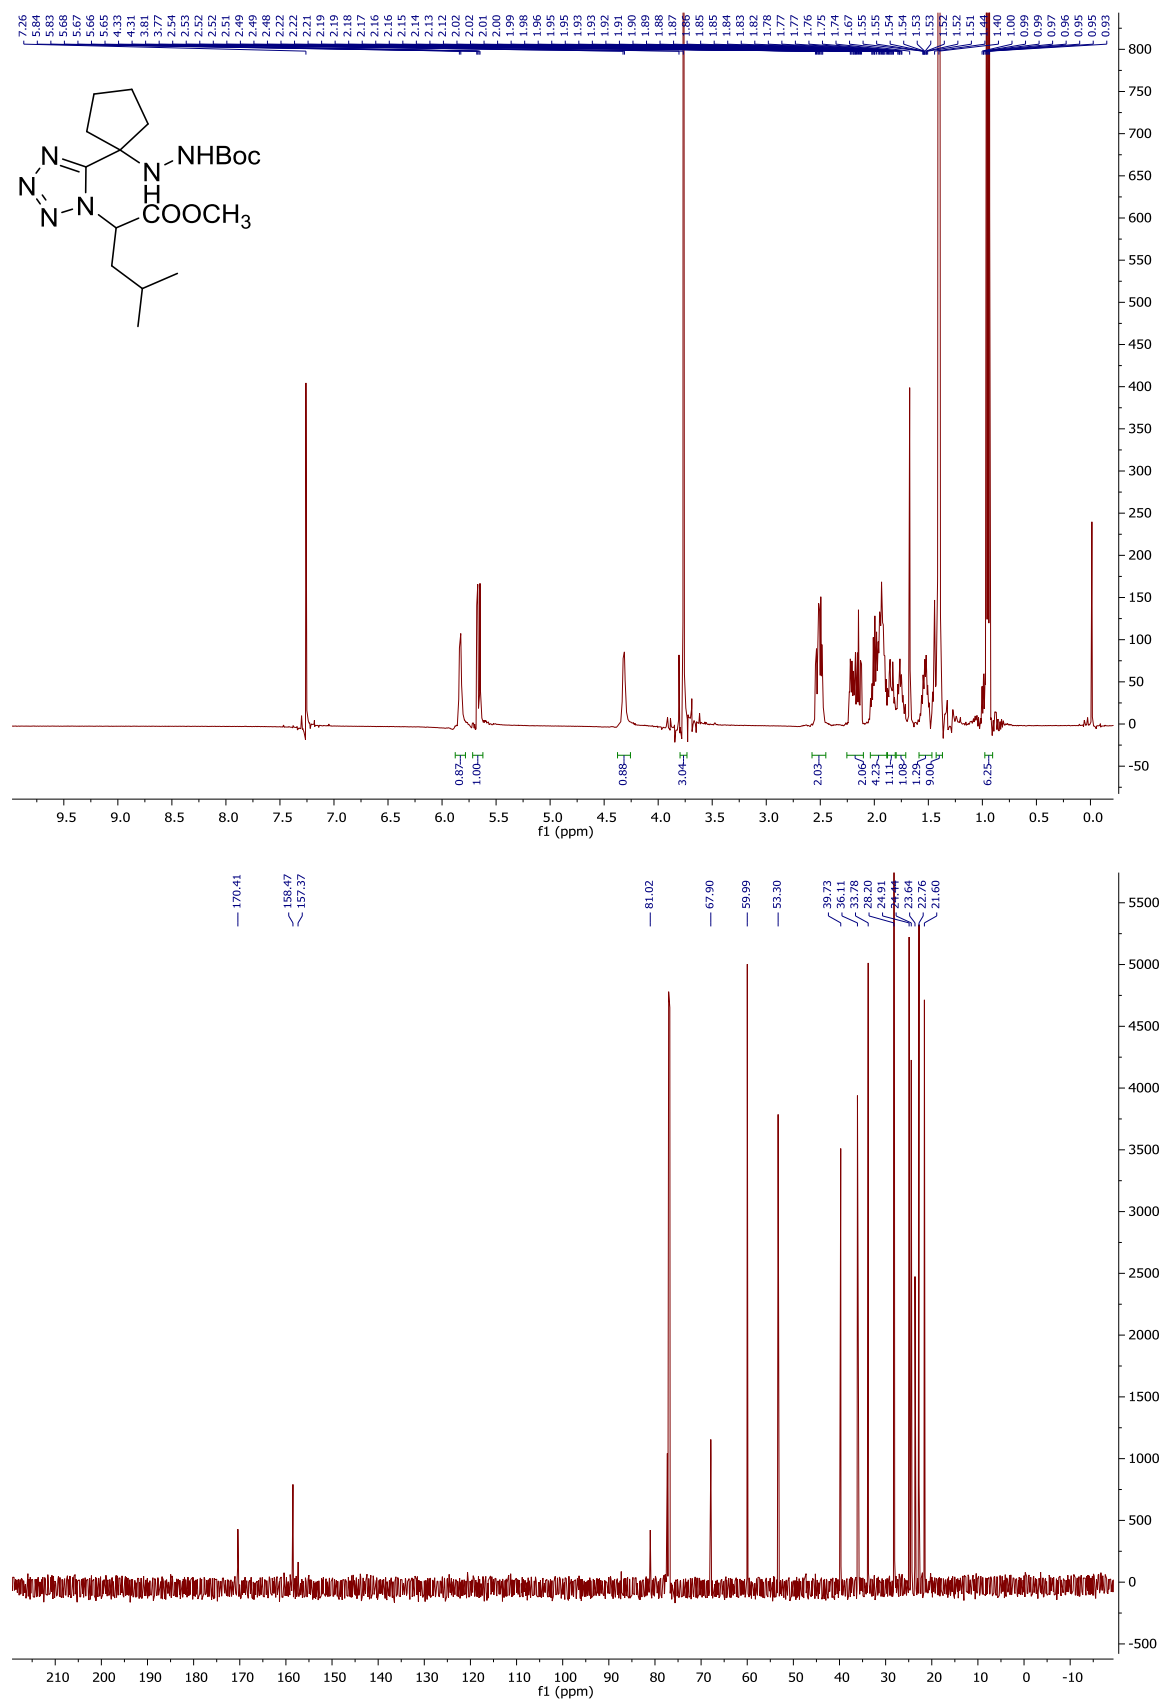

156ugi #6 RT: 0.10566 AV: 1 NL: 4.00E7  
T: FTMS +p ESI Full ms [150.00-750.00]

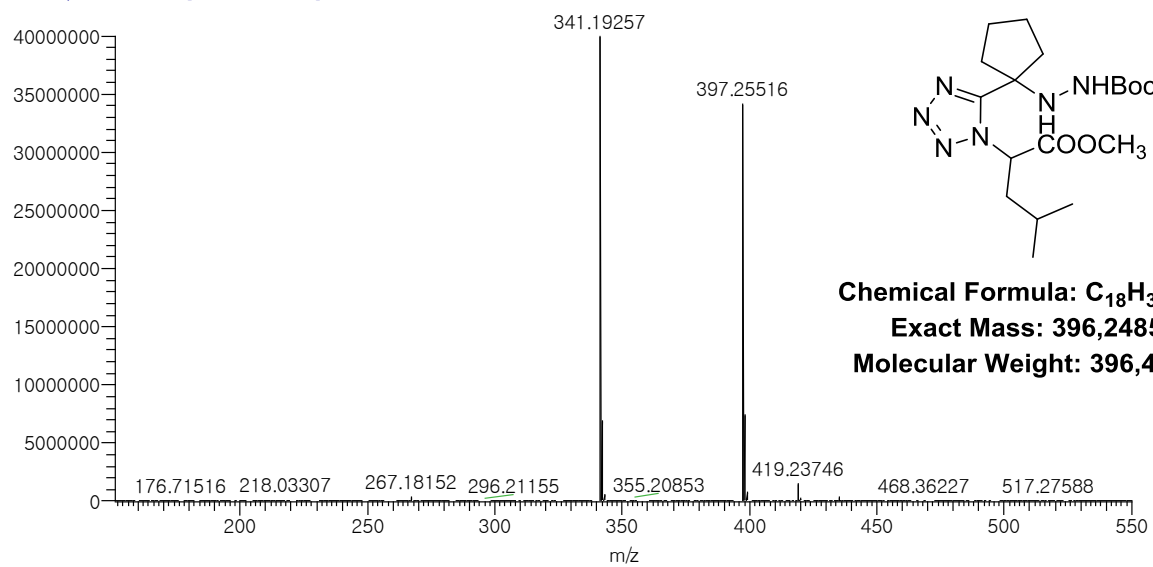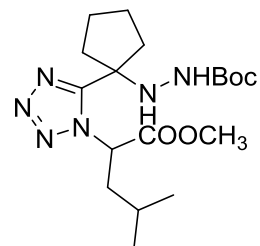

**Chemical Formula: C<sub>18</sub>H<sub>32</sub>N<sub>6</sub>O<sub>4</sub>**

**Exact Mass: 396,24850**

**Molecular Weight: 396,49200**

**8c: *tert*-butyl (5'-isobutyl-6'-oxo-5',6'-dihydro-7'*H*-spiro[cyclopentane-1,8'-tetrazolo[1,5-a]pyrazin]-7'-yl)carbamate**

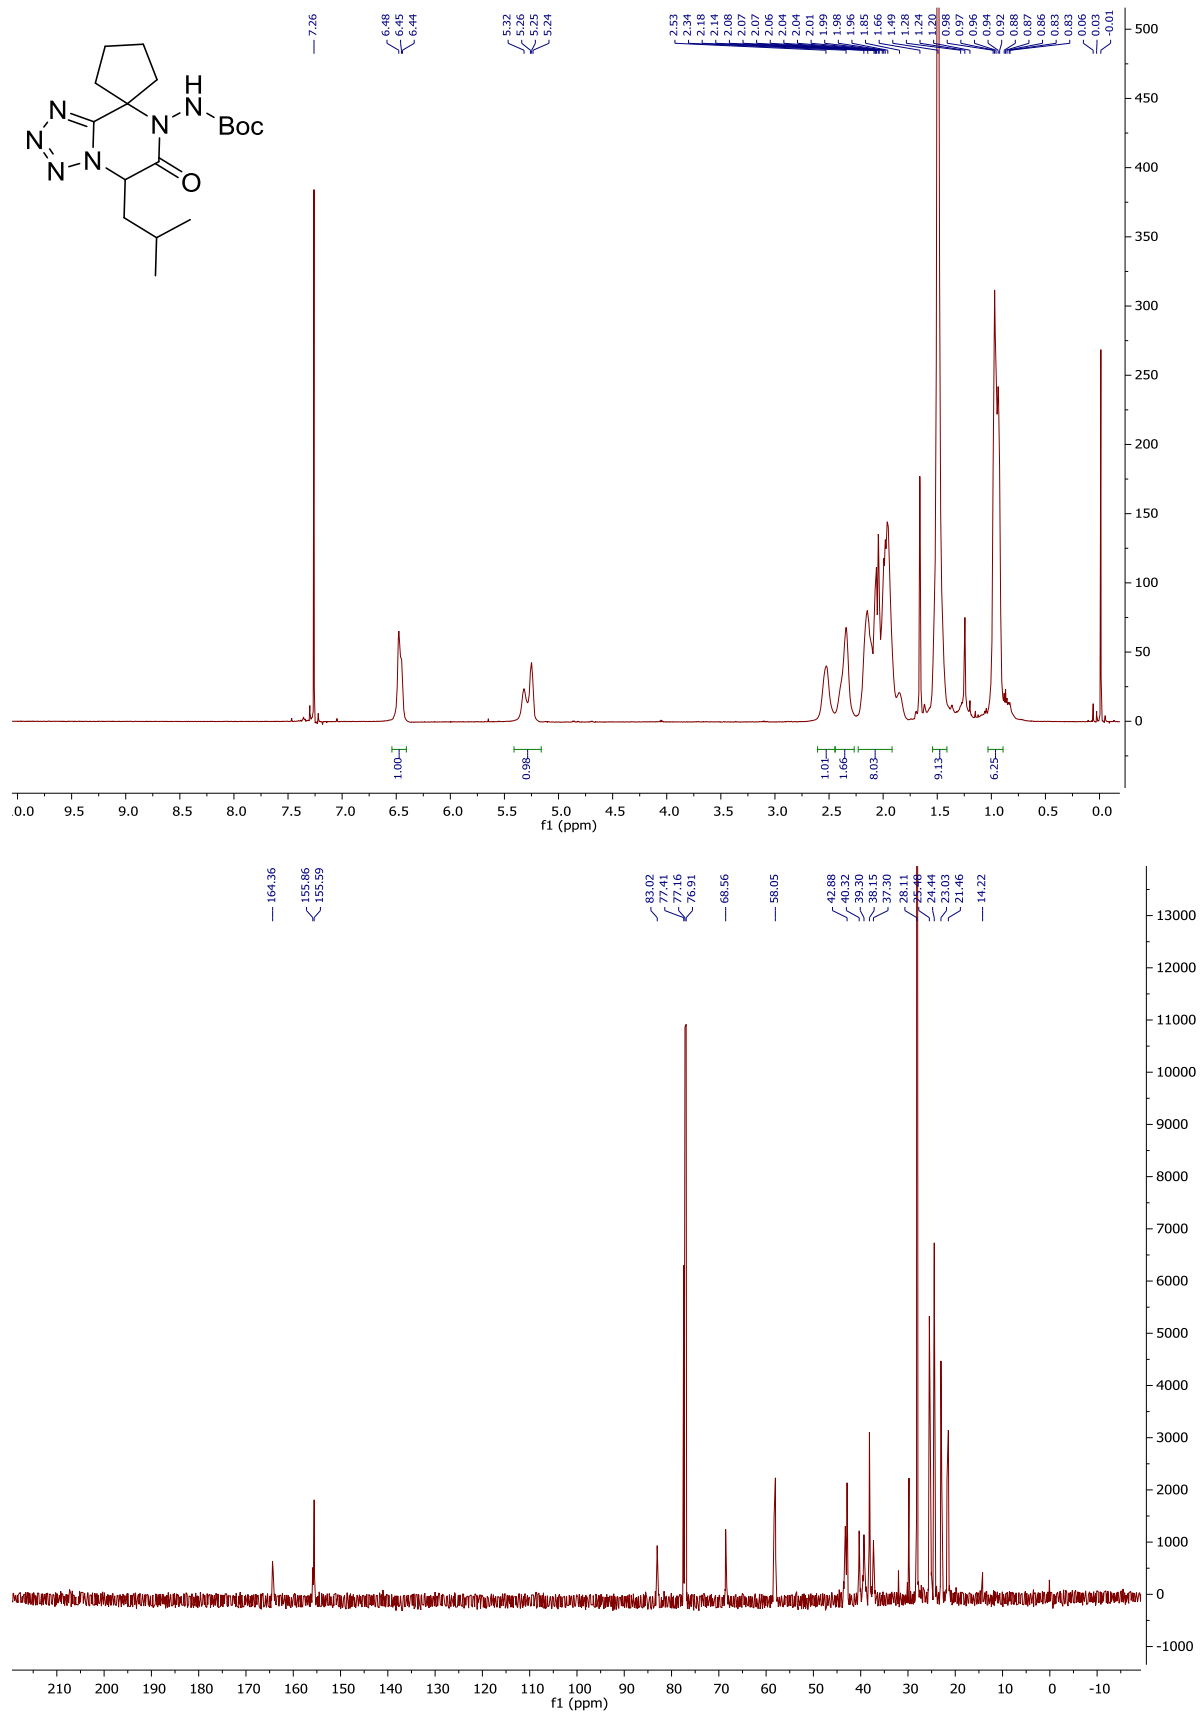



**5d: tert-butyl 2-(1-(1-(2-methoxy-2-oxoethyl)-1H-tetrazol-5-yl)cyclohexyl)hydrazine-1-carboxylate**

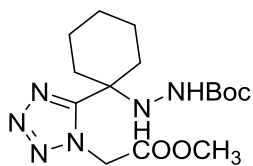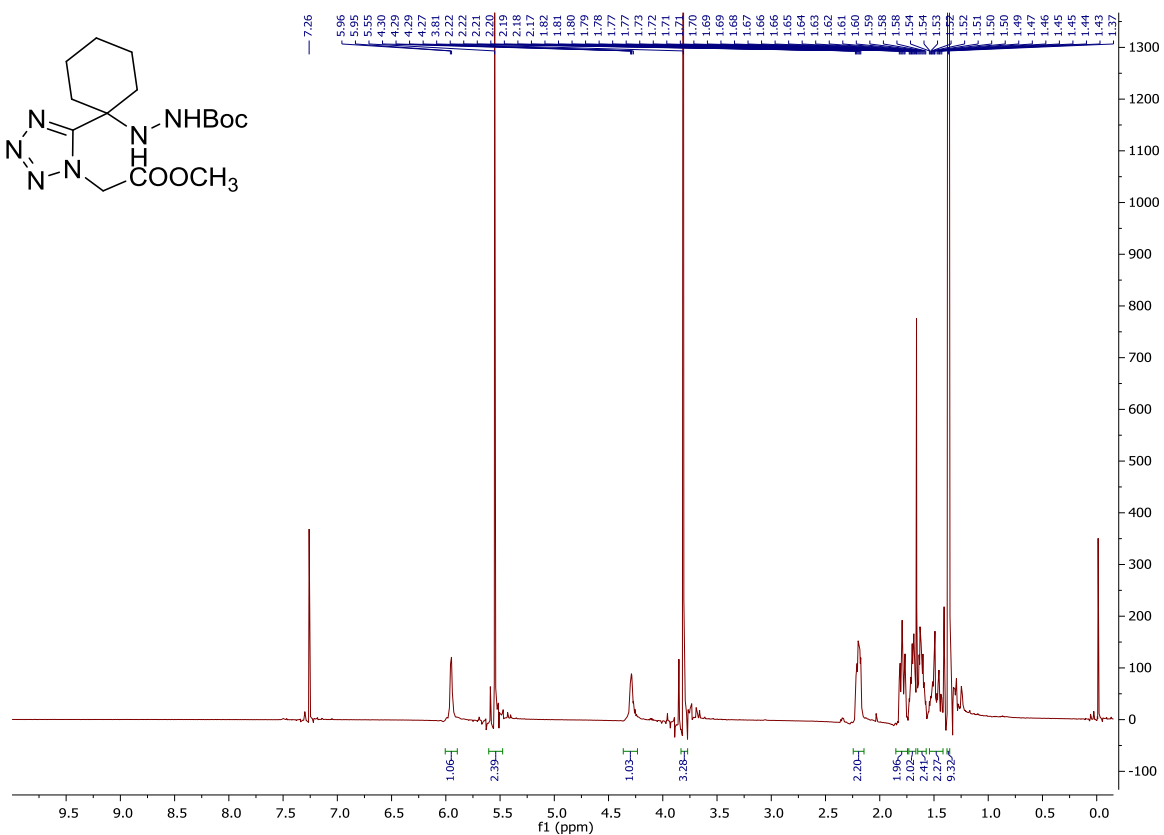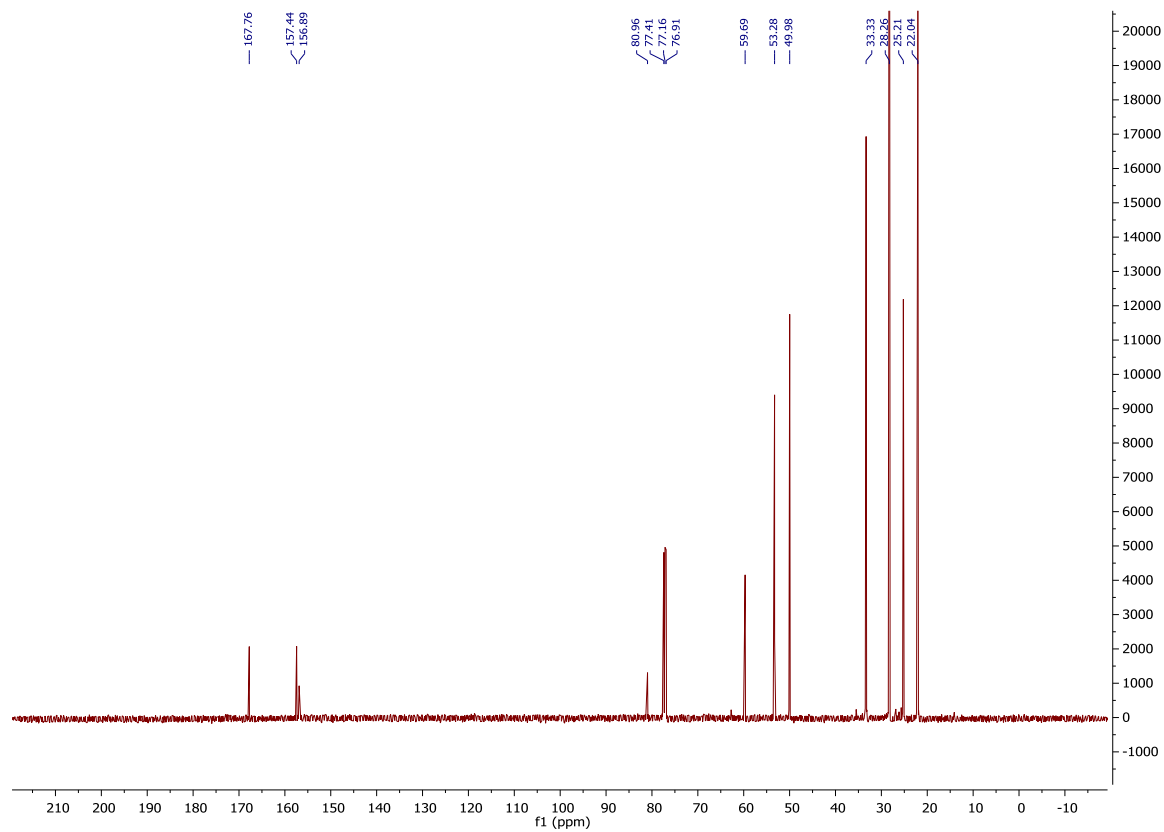

163ugi #11-15 RT: 0.18593-0.25474 AV  
T: FTMS + p ESI Full ms [150.00-750.00]

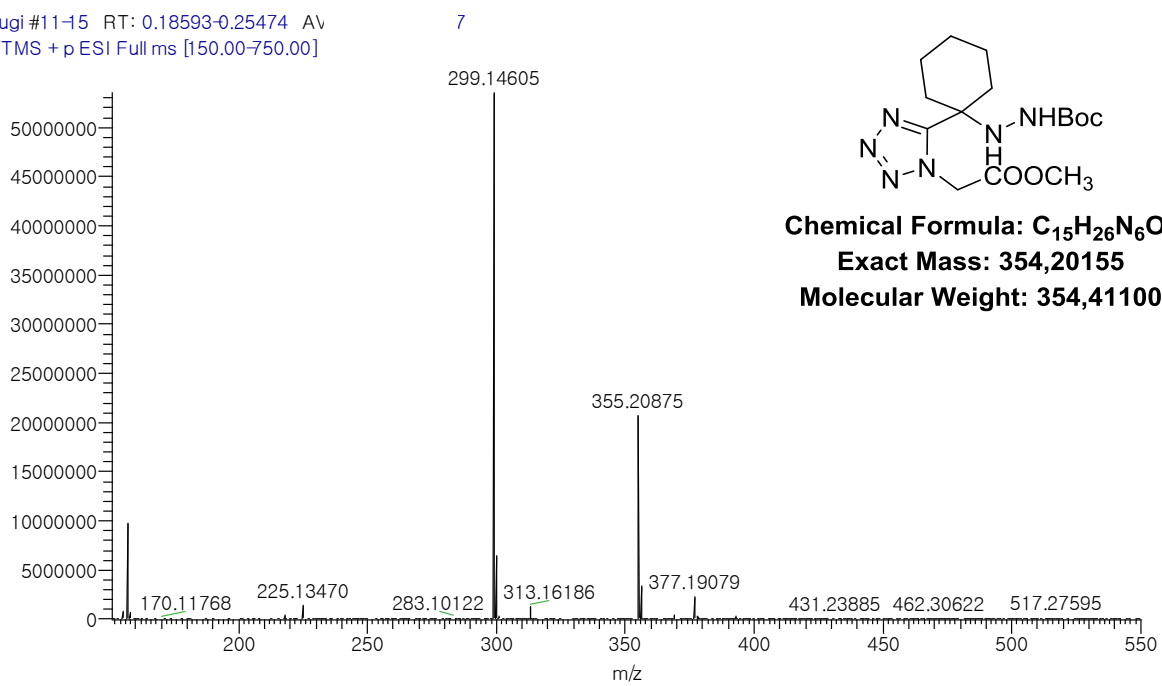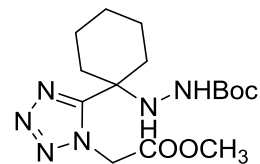

**Chemical Formula: C<sub>15</sub>H<sub>26</sub>N<sub>6</sub>O<sub>4</sub>**  
**Exact Mass: 354,20155**  
**Molecular Weight: 354,41100**

**8d: *tert*-butyl(6'-oxo-5',6'-dihydro-7'*H*-spiro[cyclohexane-1,8'-tetrazolo [1,5-*a*]pyrazin]-7'-yl)carbamate**

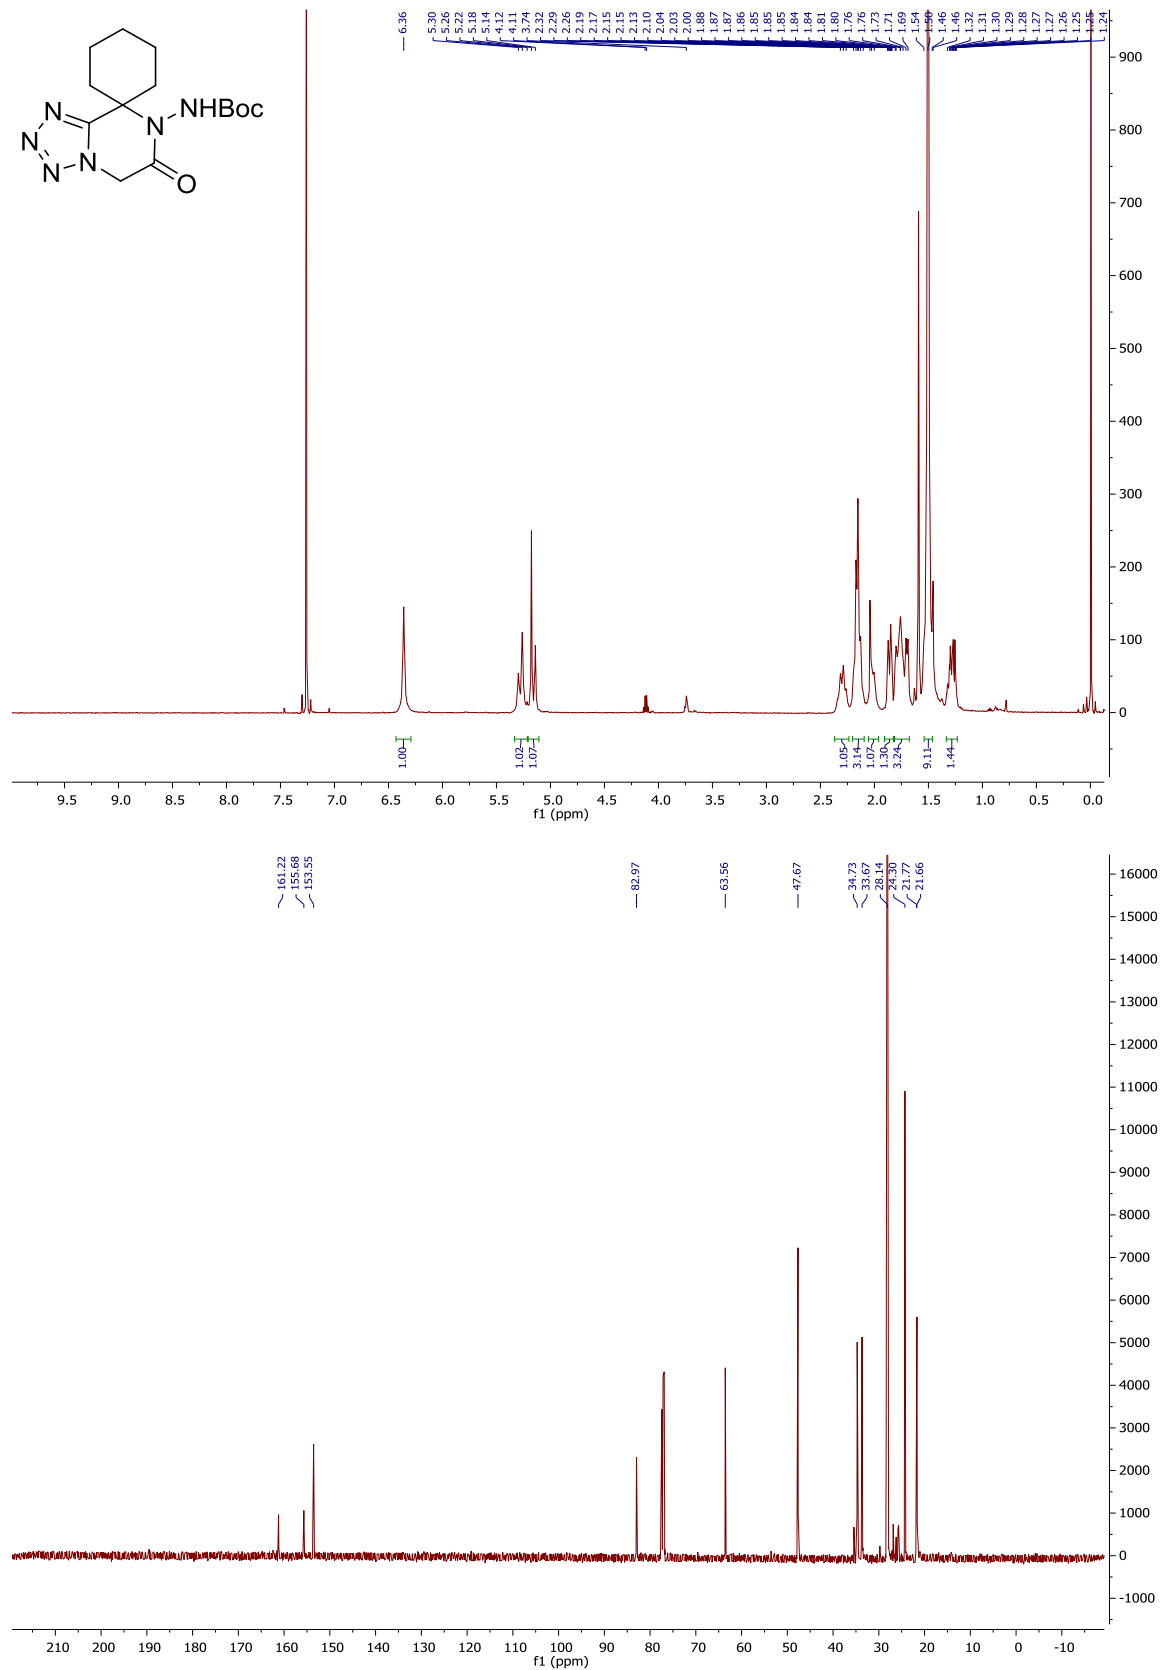

163boc #10-15 RT: 0.17244-0.25832 A'  
T: FTMS + p ESI Full ms [150.00-750.00] 6

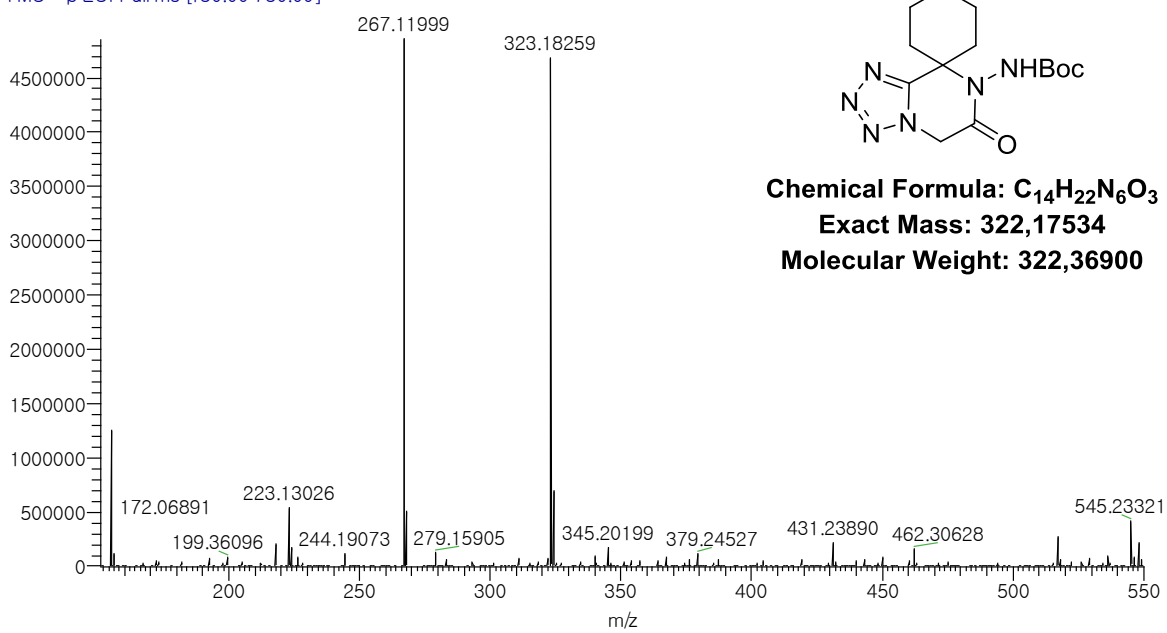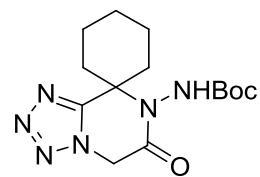

**Chemical Formula: C<sub>14</sub>H<sub>22</sub>N<sub>6</sub>O<sub>3</sub>**  
**Exact Mass: 322,17534**  
**Molecular Weight: 322,36900**



**5e: *tert*-butyl 2-(2-(1-(1-methoxy-1-oxo-3-phenylpropan-2-yl)-1*H*-tetra-zol-5-yl)propan-2-yl)hydrazine-1-carboxylate**

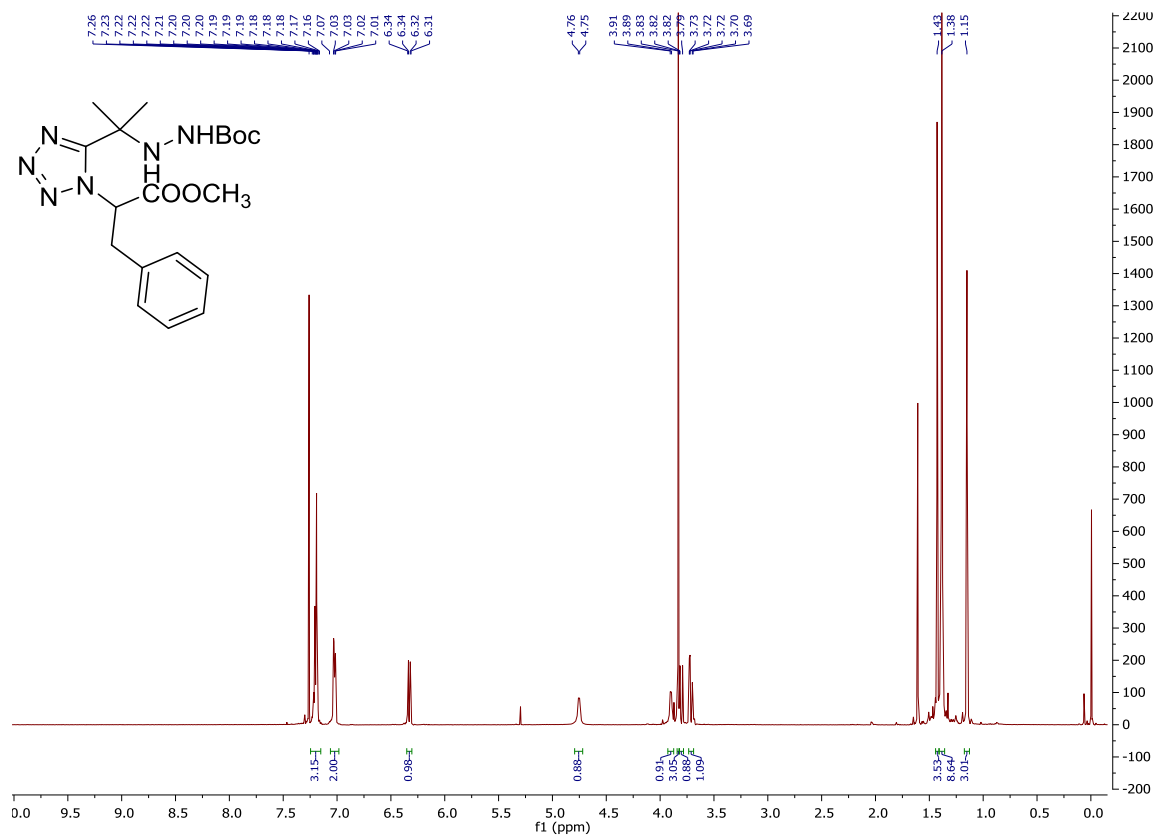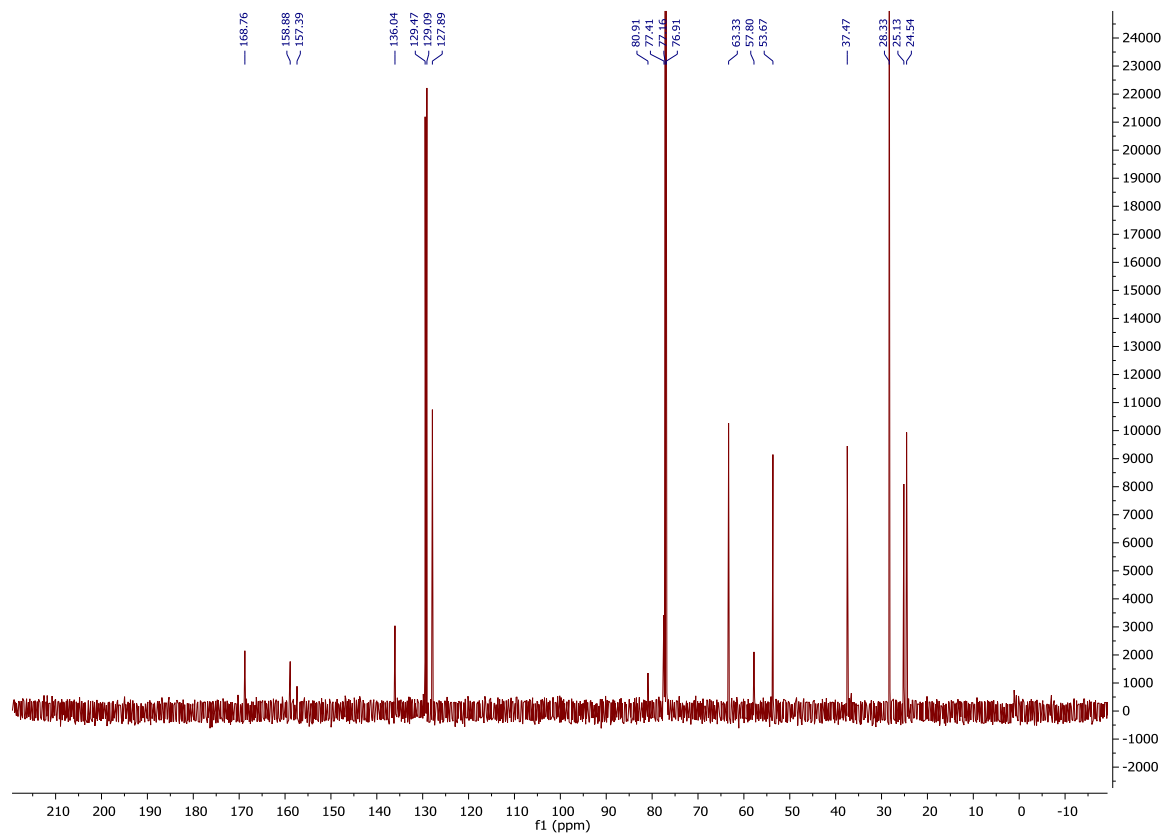

173ugi #10-15 RT: 0.17105-0.25569 AV  
T: FTMS + p ESI Full ms [150.00-750.00]

7

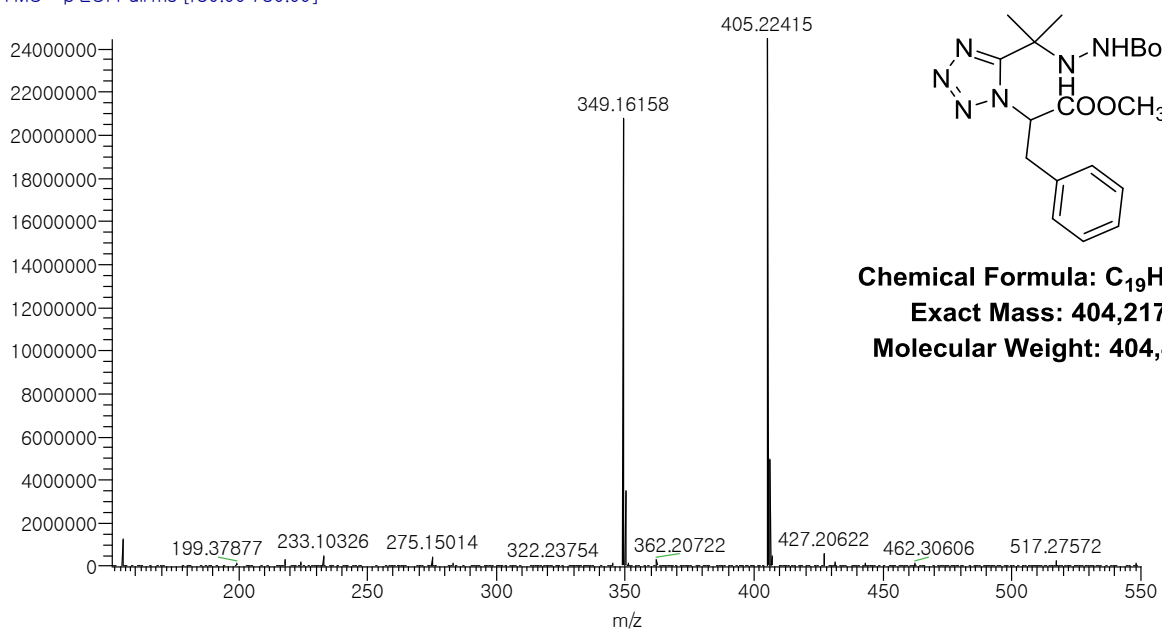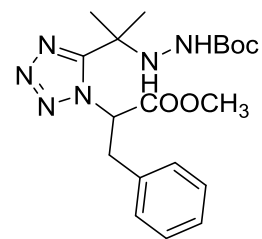

**Chemical Formula: C<sub>19</sub>H<sub>28</sub>N<sub>6</sub>O<sub>4</sub>**  
**Exact Mass: 404,21720**  
**Molecular Weight: 404,47100**

**8e: *tert*-butyl (5-benzyl-8,8-dimethyl-6-oxo-5,6-dihydro-1H-tetrazolo[1,5-a]pyrazin-7(8H)-yl) carbamate**

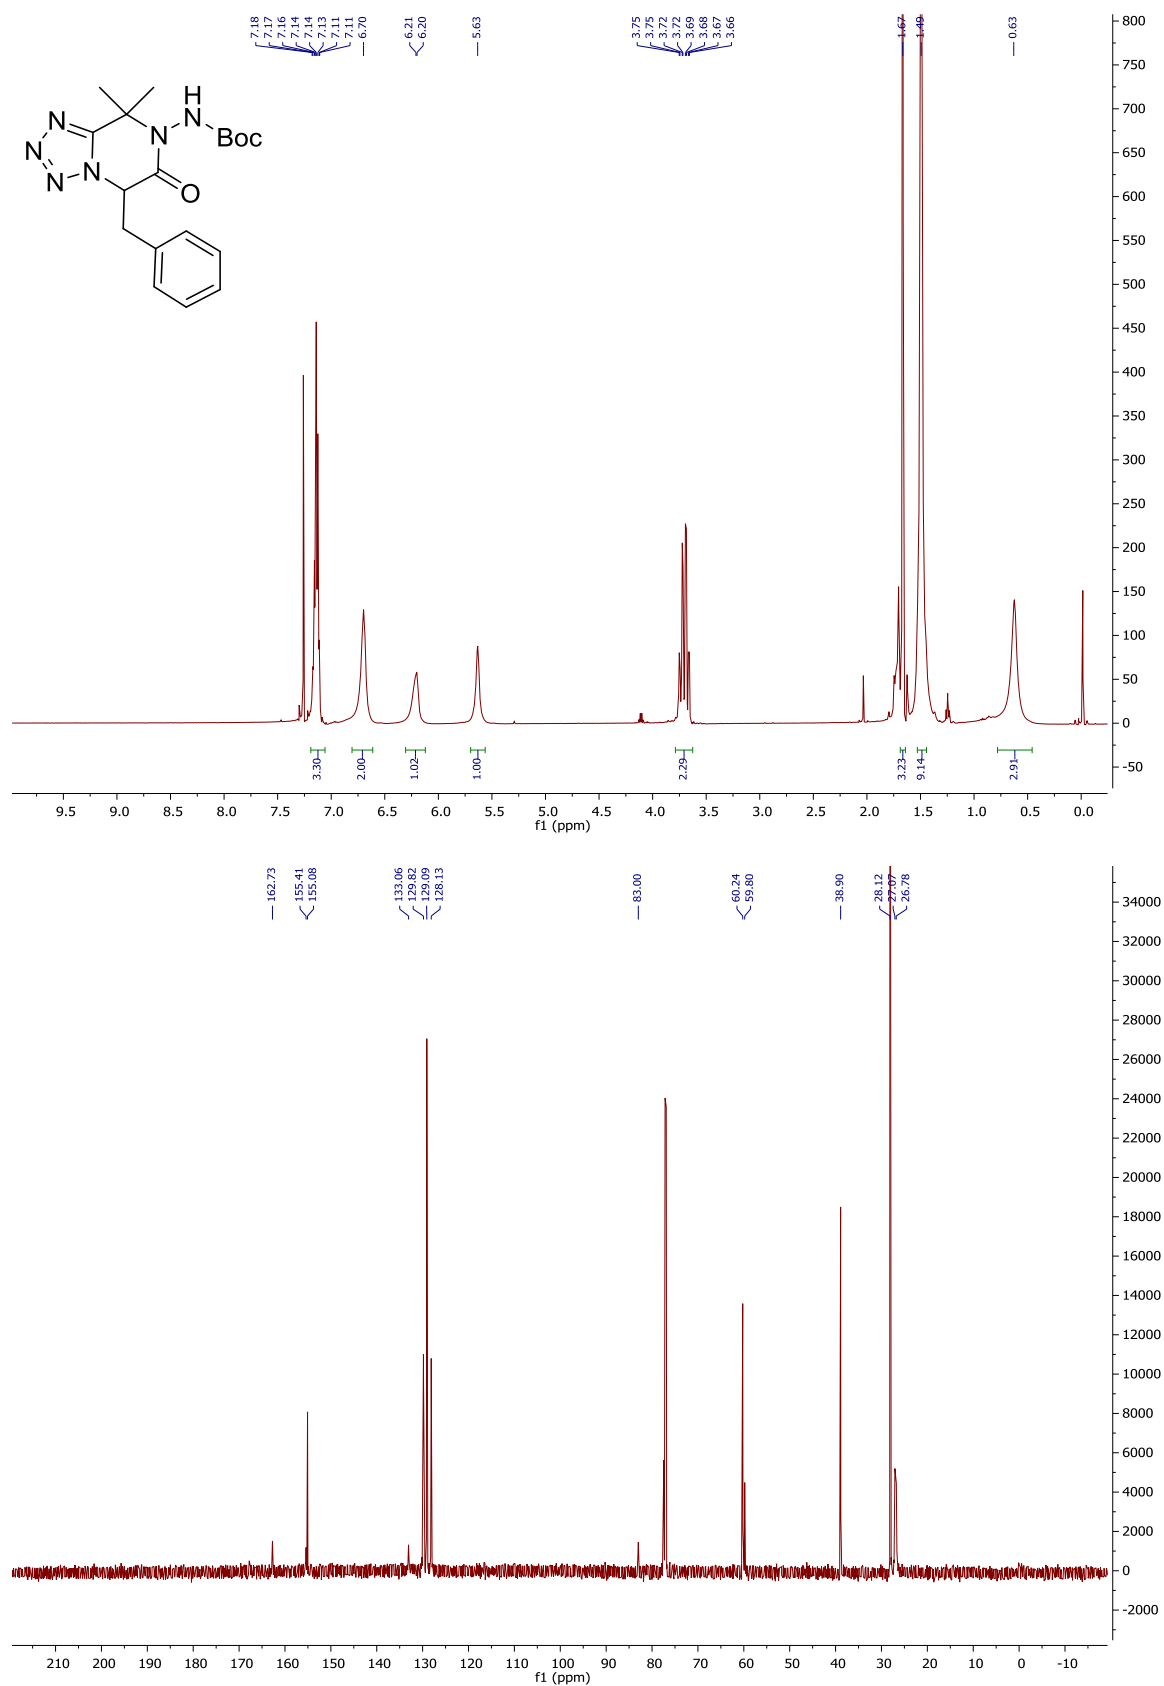

173boc #10-15 RT: 0.17466-0.25969 A'  
T: FTMS + p ESI Full ms [150.00-750.00]

.7

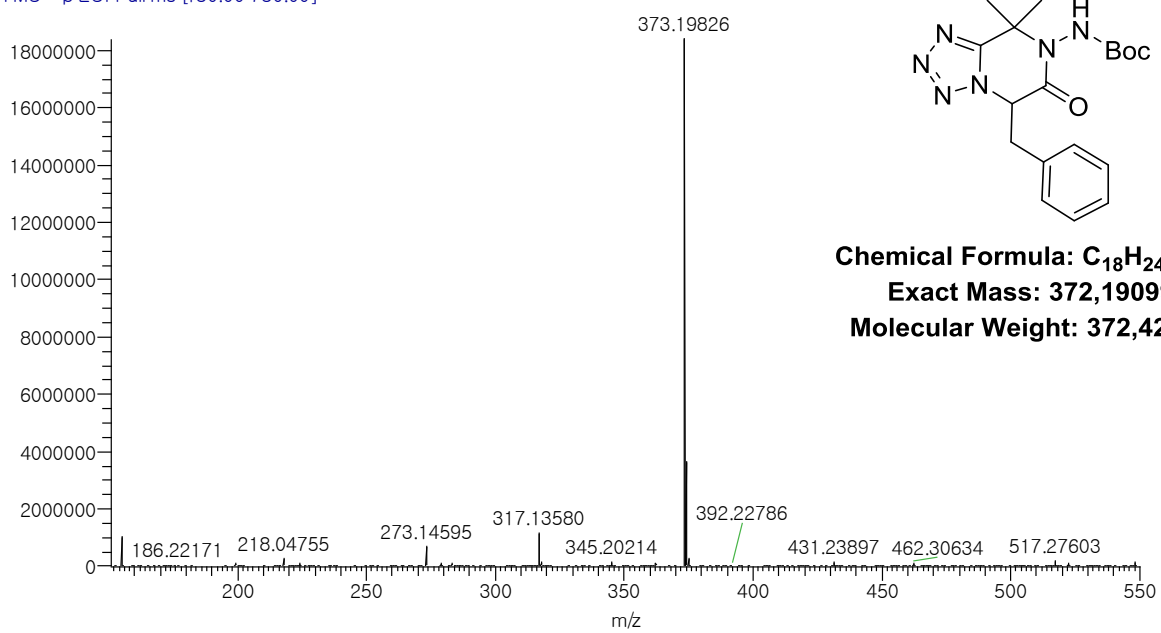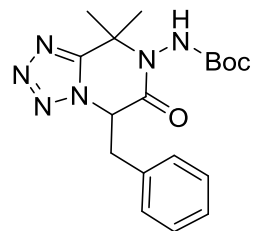

**Chemical Formula: C<sub>18</sub>H<sub>24</sub>N<sub>6</sub>O<sub>3</sub>**  
**Exact Mass: 372,19099**  
**Molecular Weight: 372,42900**

**5f: *tert*-butyl 2-(1-(1-(1-methoxy-1-oxo-3-phenylpropan-2-yl)-1*H*-tetrazol-5-yl)cyclopentyl)hydrazine-1-carboxylate**

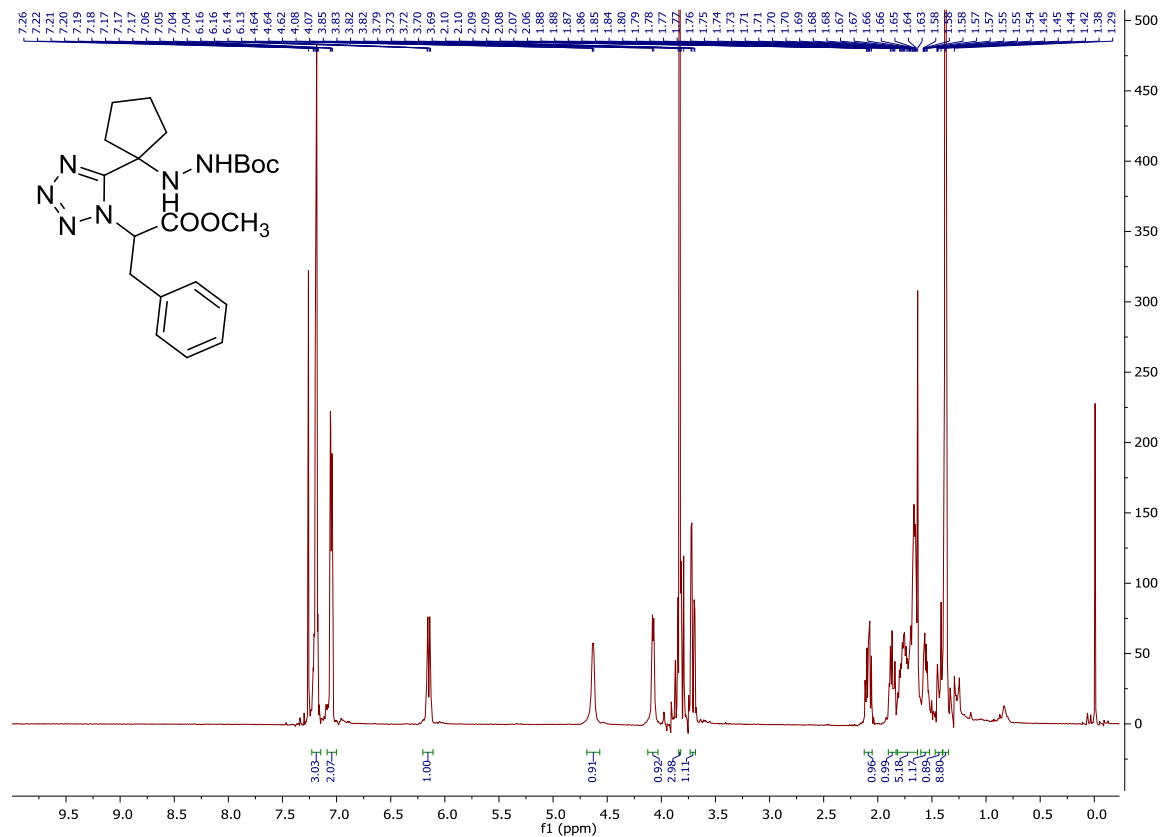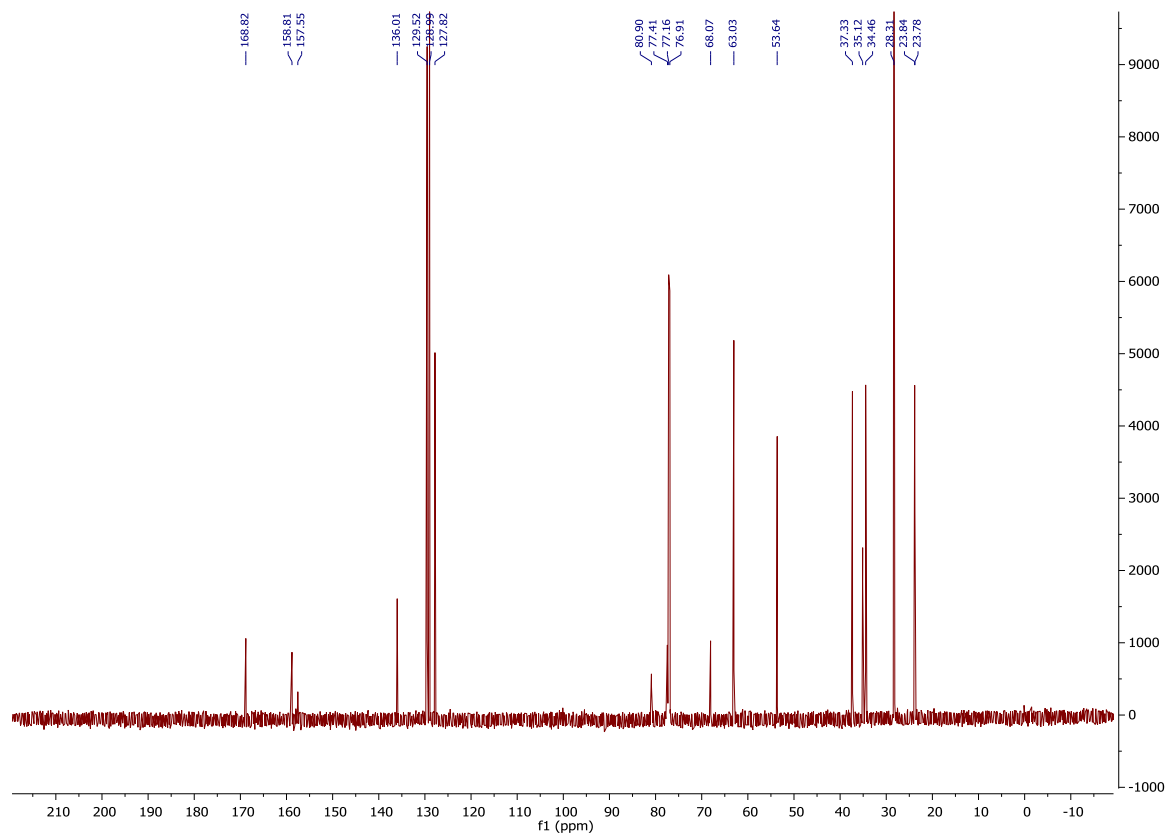

174ugl #21-25 RT: 0.35944-0.44317 Av  
T: FTMS + p ESI Full ms [150.00-750.00]

3

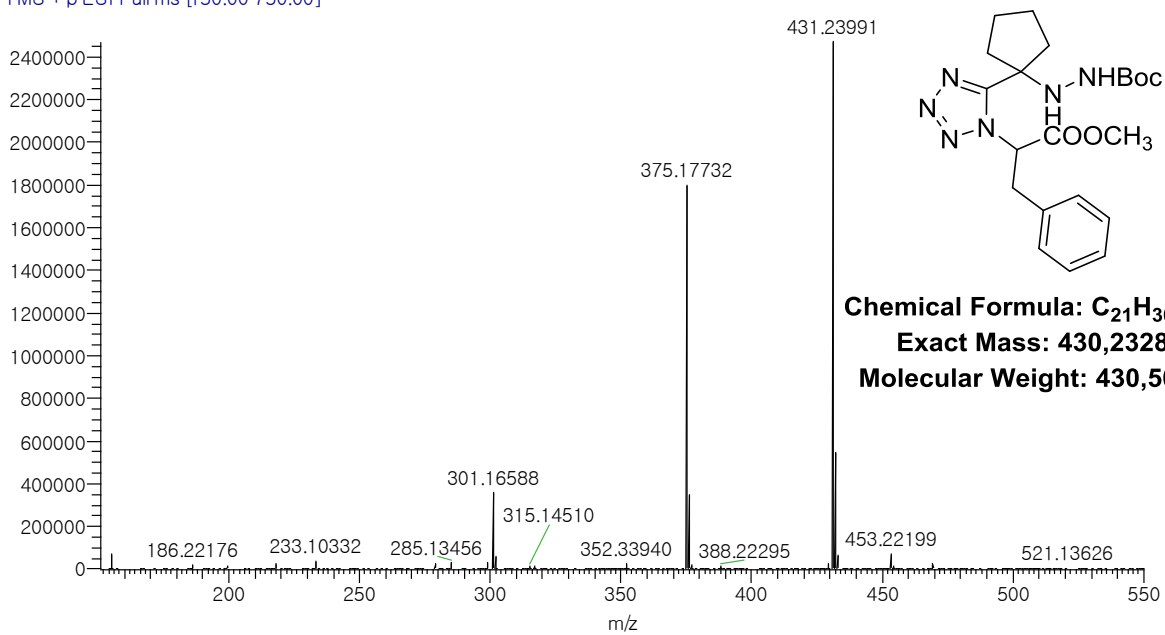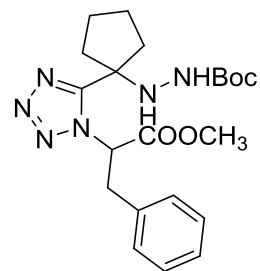

**Chemical Formula: C<sub>21</sub>H<sub>30</sub>N<sub>6</sub>O<sub>4</sub>**  
**Exact Mass: 430,23285**  
**Molecular Weight: 430,50900**

**8f: *tert*-butyl (5'-benzyl-6'-oxo-5',6'-dihydro-7'*H*-spiro[cyclohexane-1,8'-tetrazolo[1,5-*a*]pyrazin]-7'-yl)carbamate**

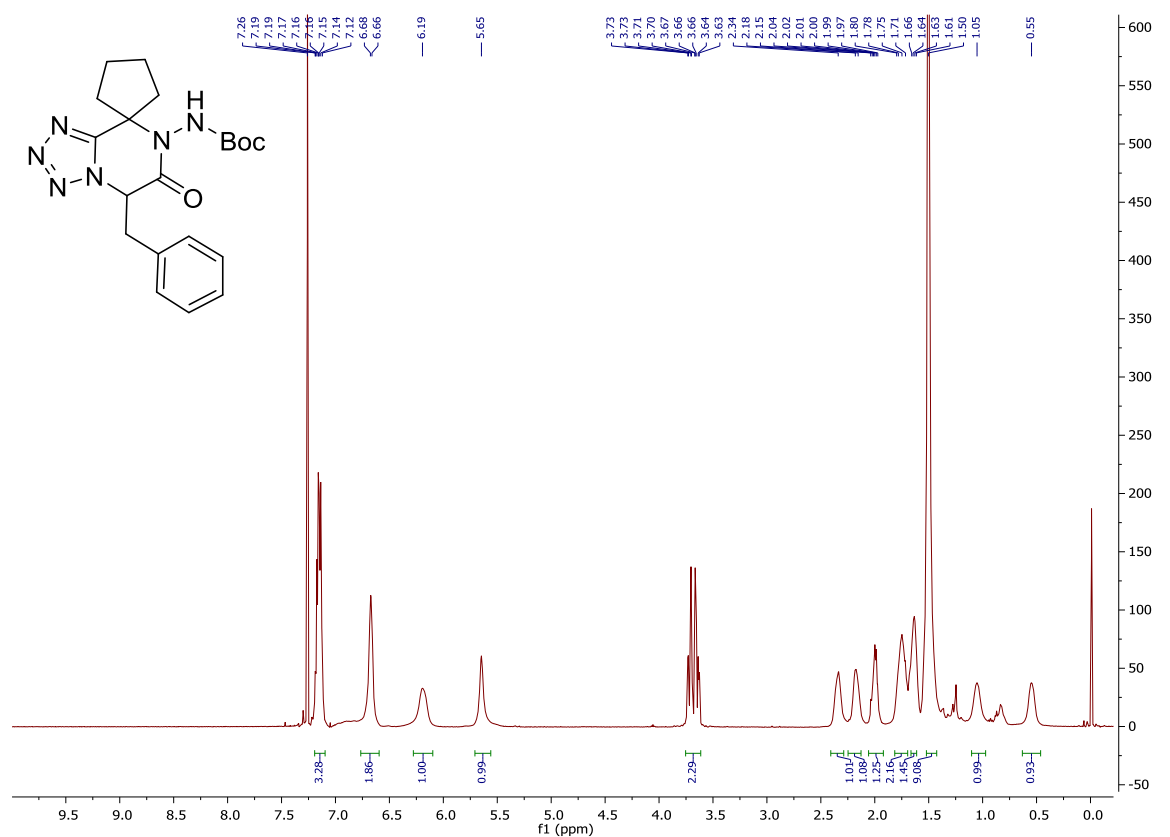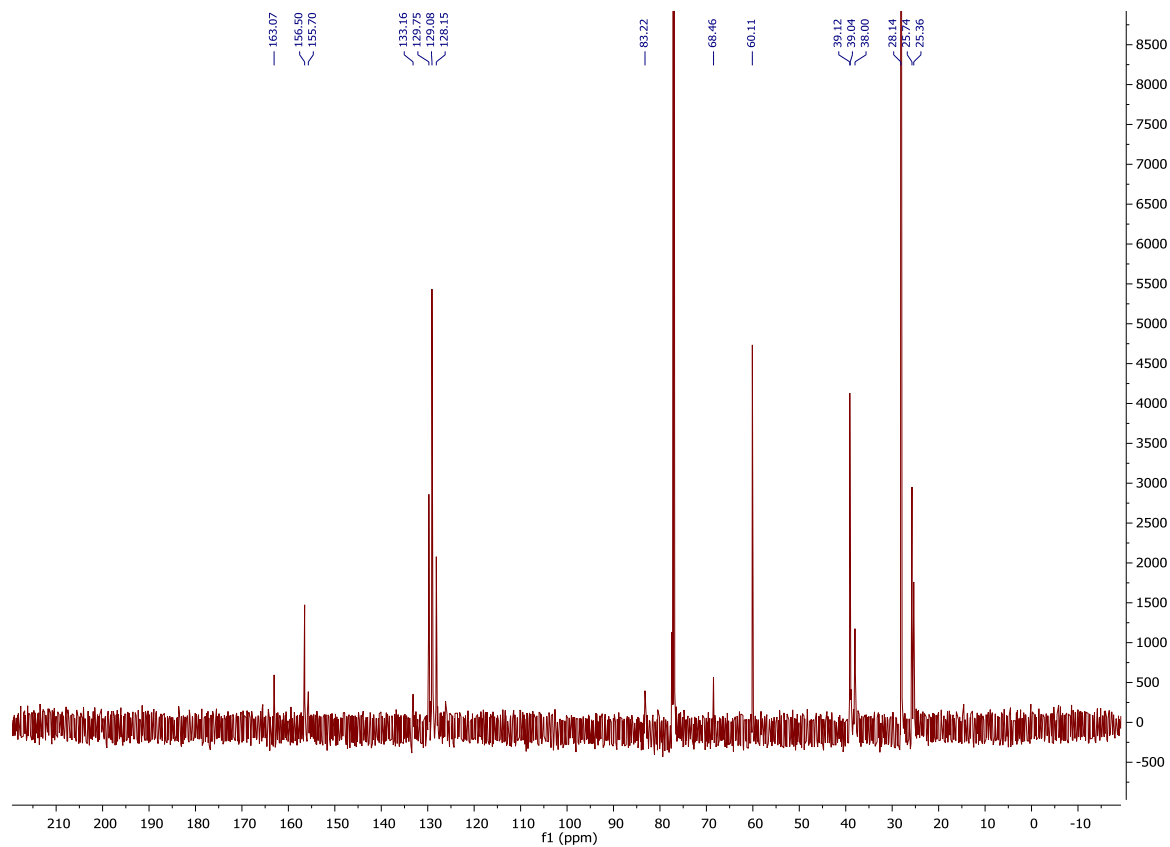

174boc #10-15 RT: 0.17430-0.25028 A'  
T: FTMS + p ESI Full ms [150.00-750.00]

.7

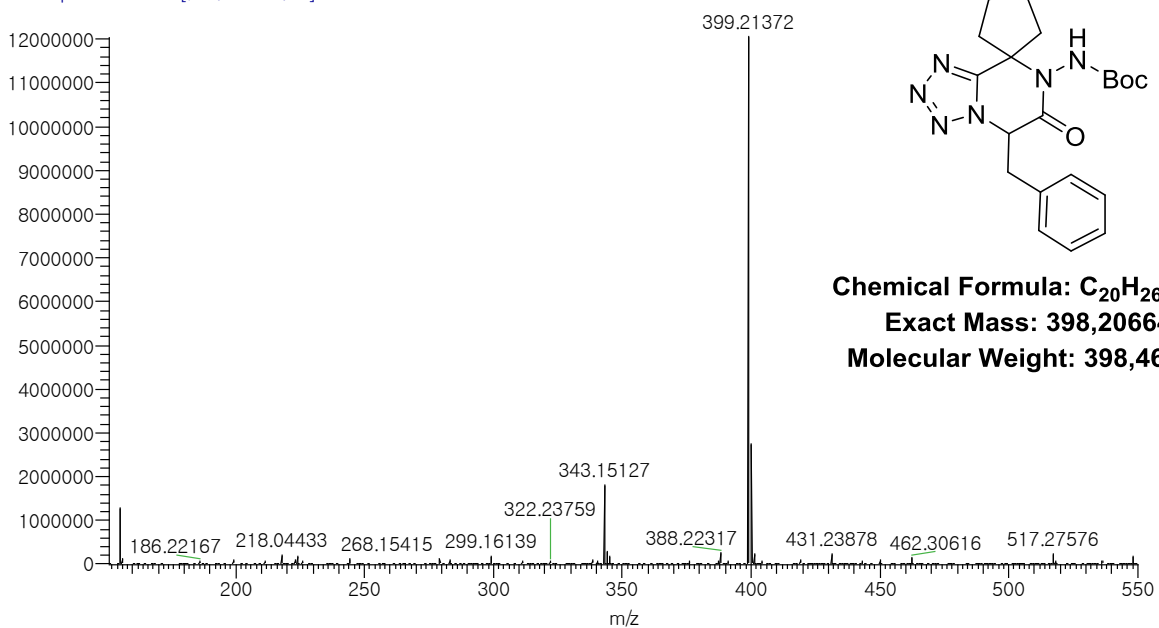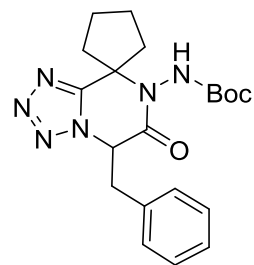

**Chemical Formula: C<sub>20</sub>H<sub>26</sub>N<sub>6</sub>O<sub>3</sub>**  
**Exact Mass: 398,20664**  
**Molecular Weight: 398,46700**



**5g: tert-butyl 2-(2-(1-(1-methoxy-3-methyl-1-oxobutan-2-yl)-1H-tetrazol-5-yl)propan-2-yl)hydrazine-1-carboxylate**

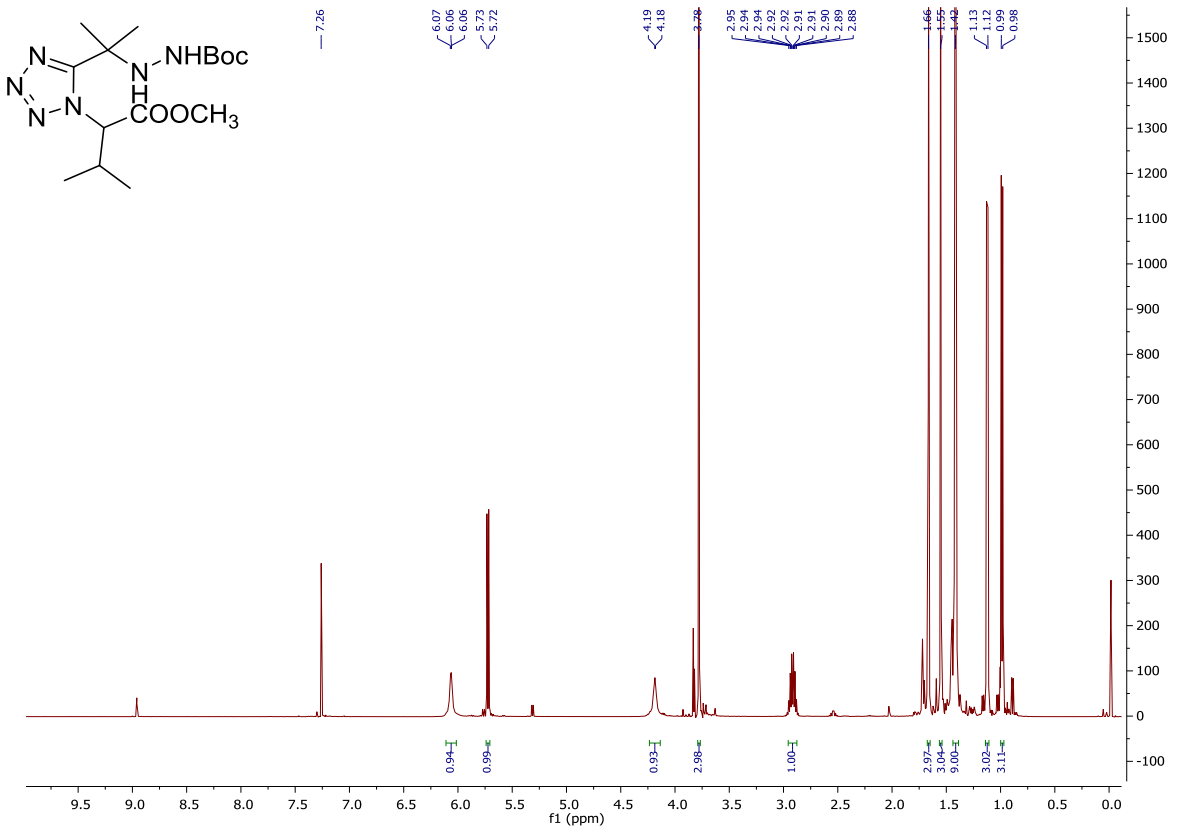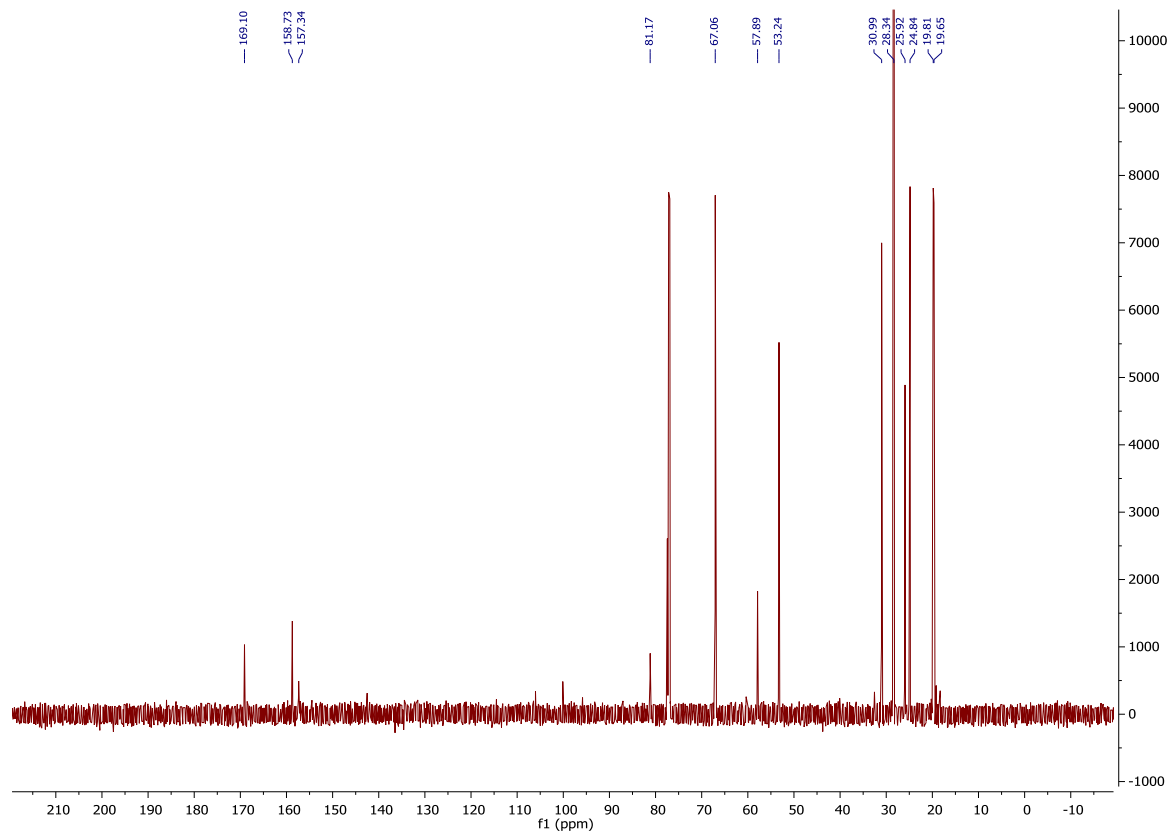

150ugl #10-15 RT: 0.17263-0.25956 AV  
T: FTMS + p ESI Full ms [150.00-750.00]

7

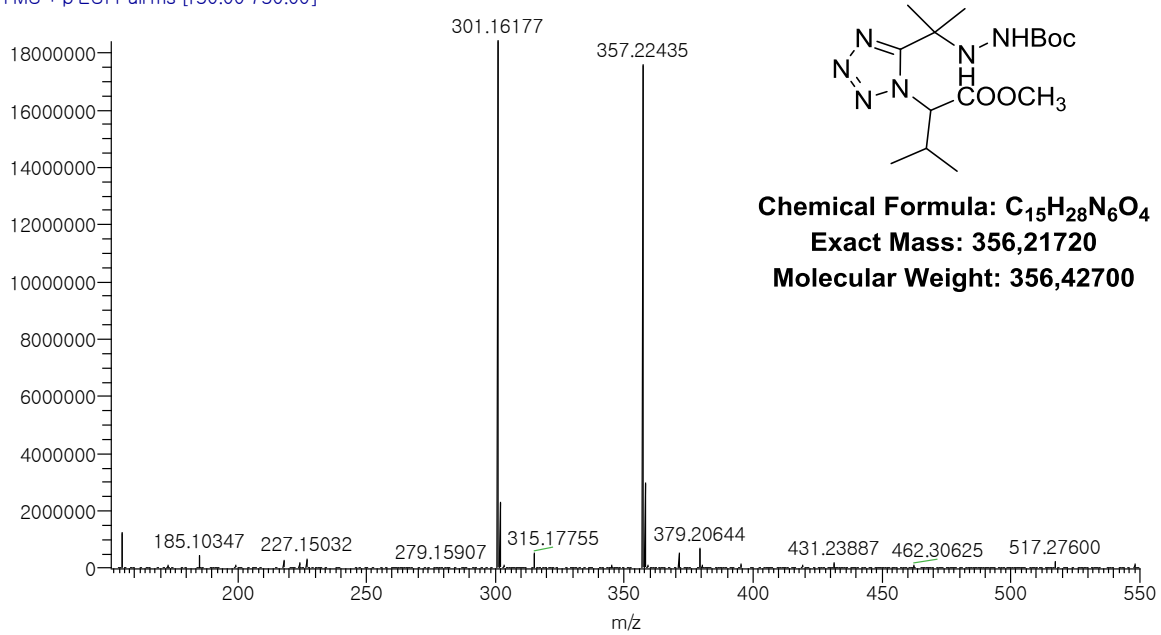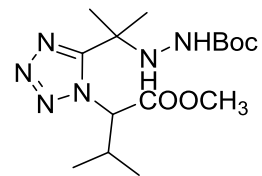

**Chemical Formula: C<sub>15</sub>H<sub>28</sub>N<sub>6</sub>O<sub>4</sub>**  
**Exact Mass: 356,21720**  
**Molecular Weight: 356,42700**

**8g: tert-butyl (5-isopropyl-8,8-dimethyl-6-oxo-5,6-dihydro-1,5-dihydro-1H-tetrazolo[1,5-a]pyrazin-7(8H)-yl)carbamate**

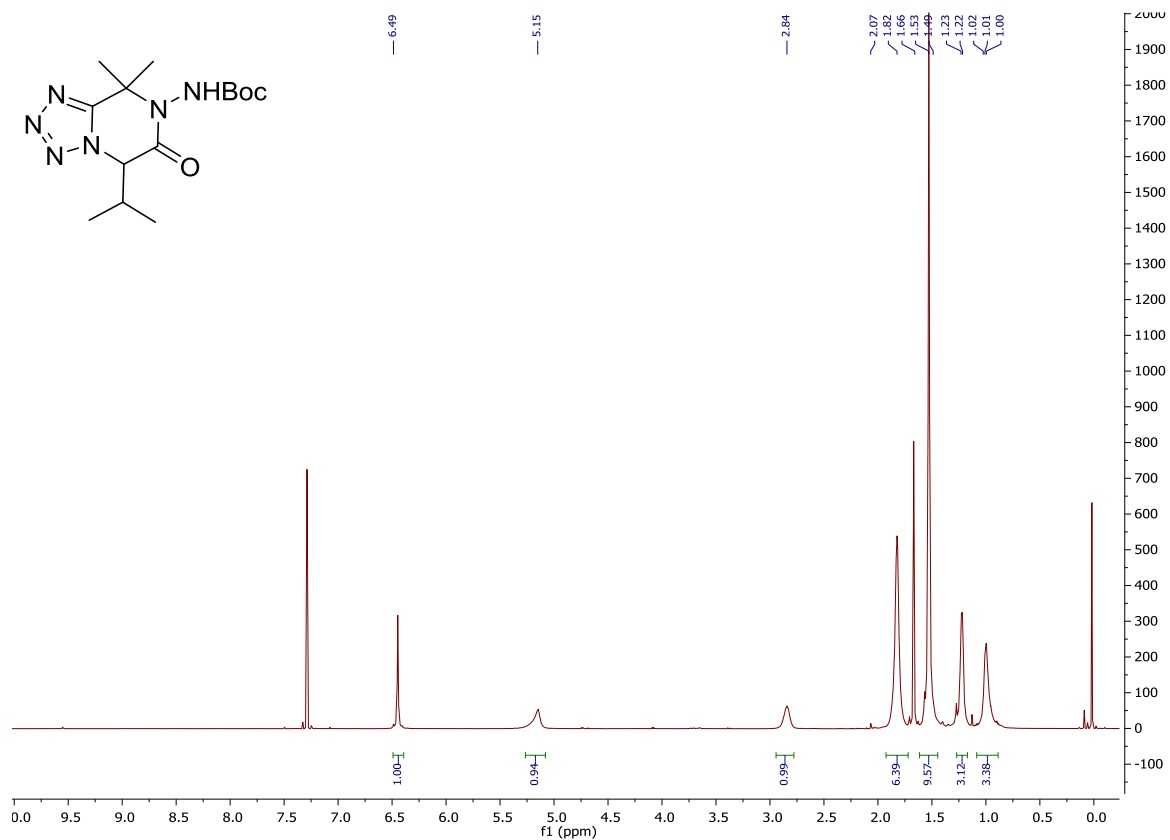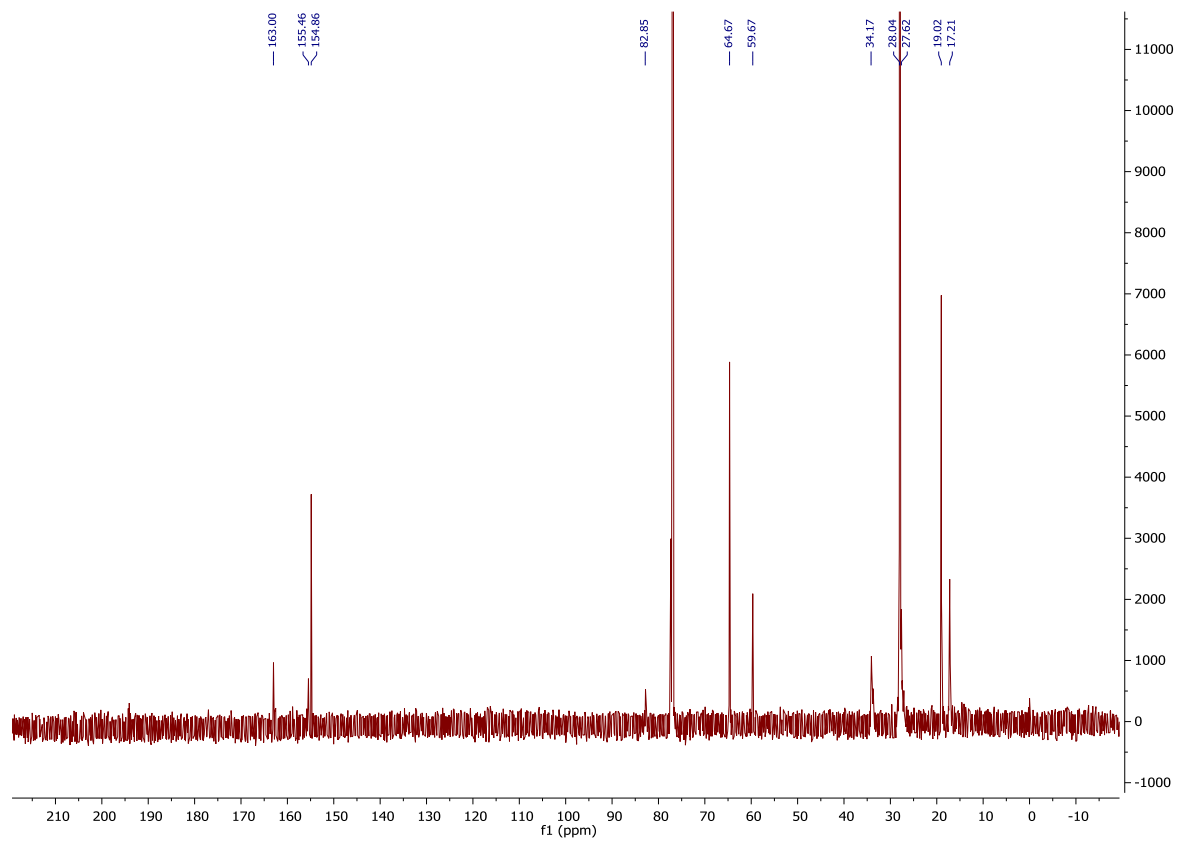

150boc #10-15 RT: 0.17554-0.25221 A' .7  
T: FTMS + p ESI Full ms [150.00-750.00]

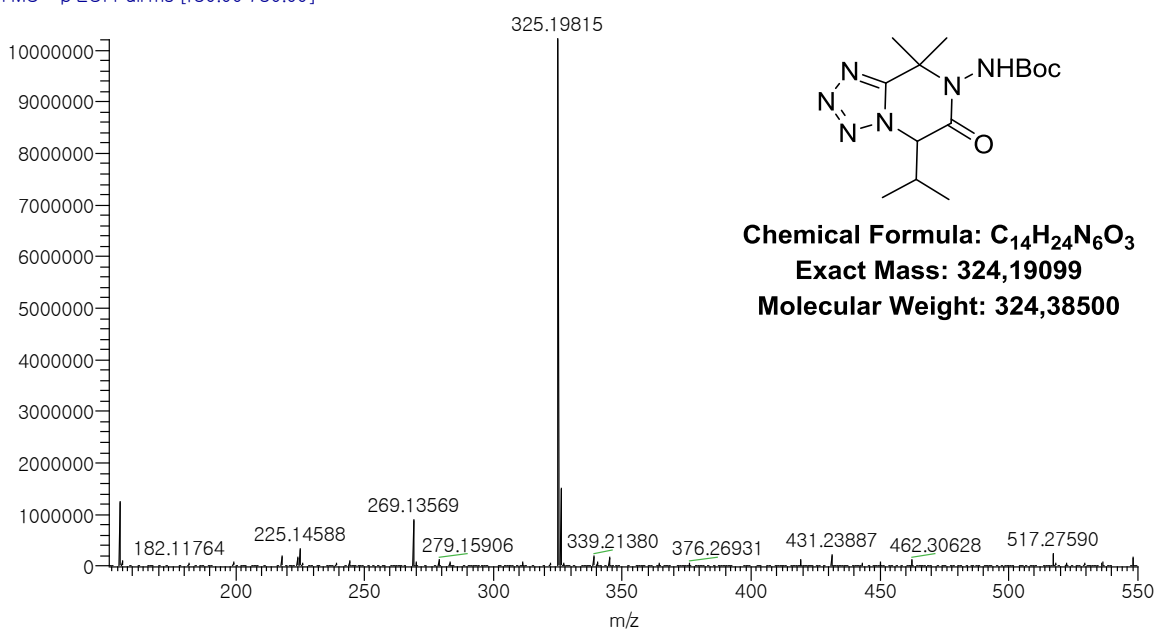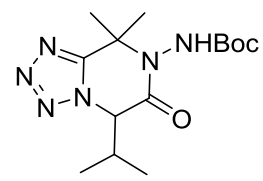

**Chemical Formula: C<sub>14</sub>H<sub>24</sub>N<sub>6</sub>O<sub>3</sub>**  
**Exact Mass: 324,19099**  
**Molecular Weight: 324,38500**

**5h: *tert*-butyl 2-(1-(1-(1-methoxy-3-methyl-1-oxobutan-2-yl)-1*H*-tetrazol-5-yl)cyclohexyl)hydrazine-1-carboxylate**

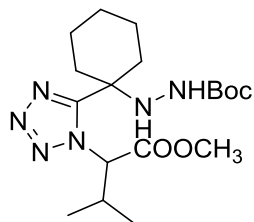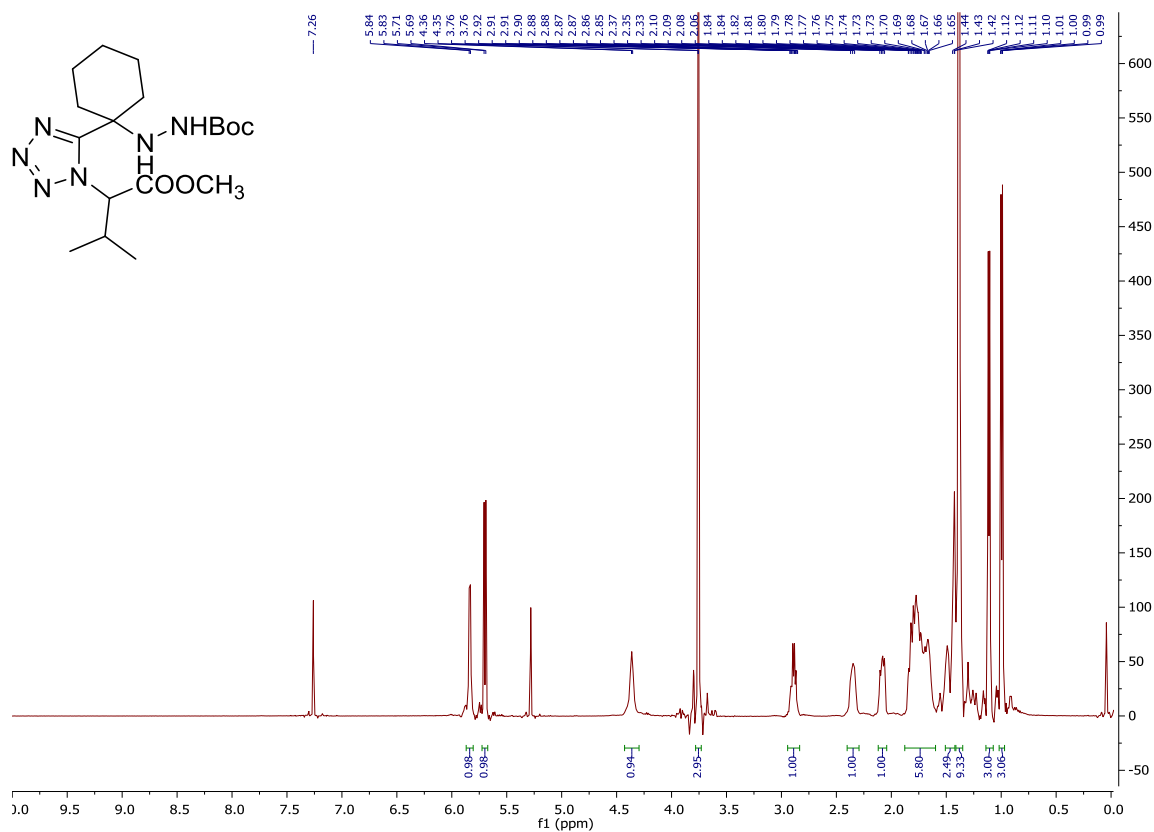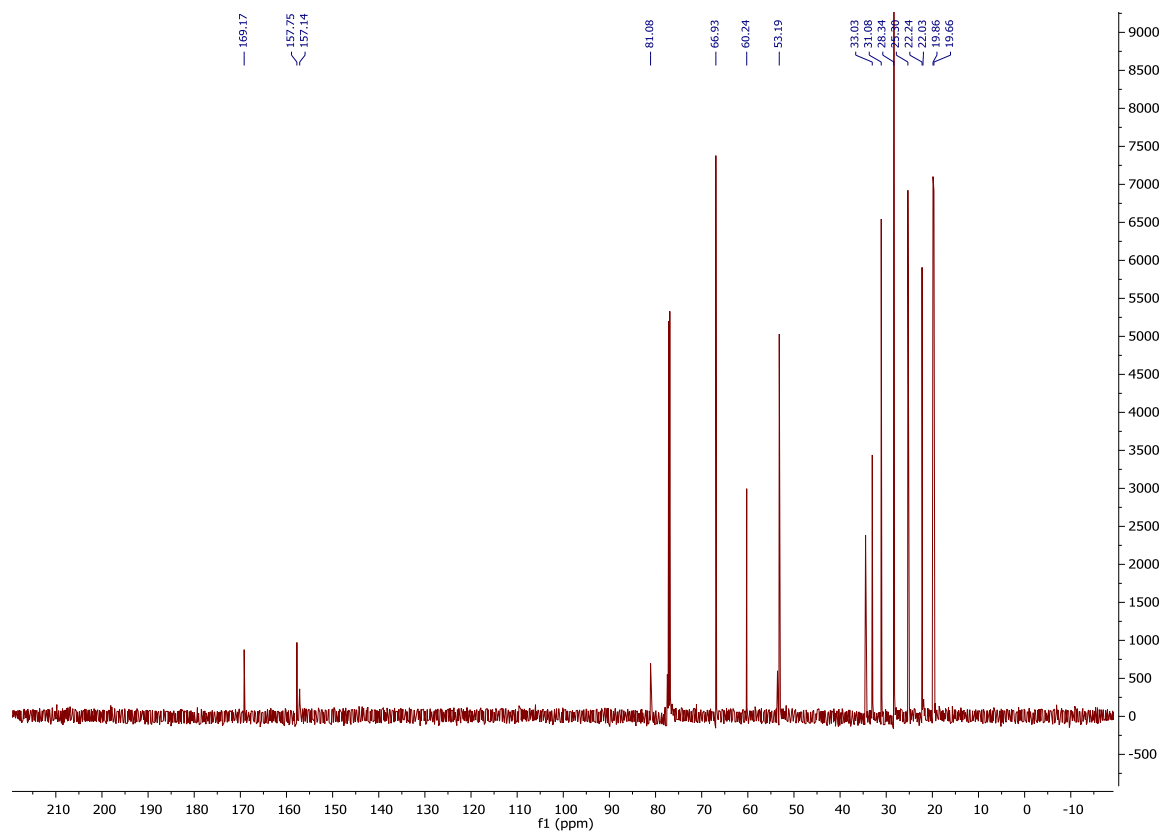

149ugi #25 RT: 0.44661 AV: 1 NL: 5.6  
T: FTMS + p ESI Full ms [150.00-750.00]

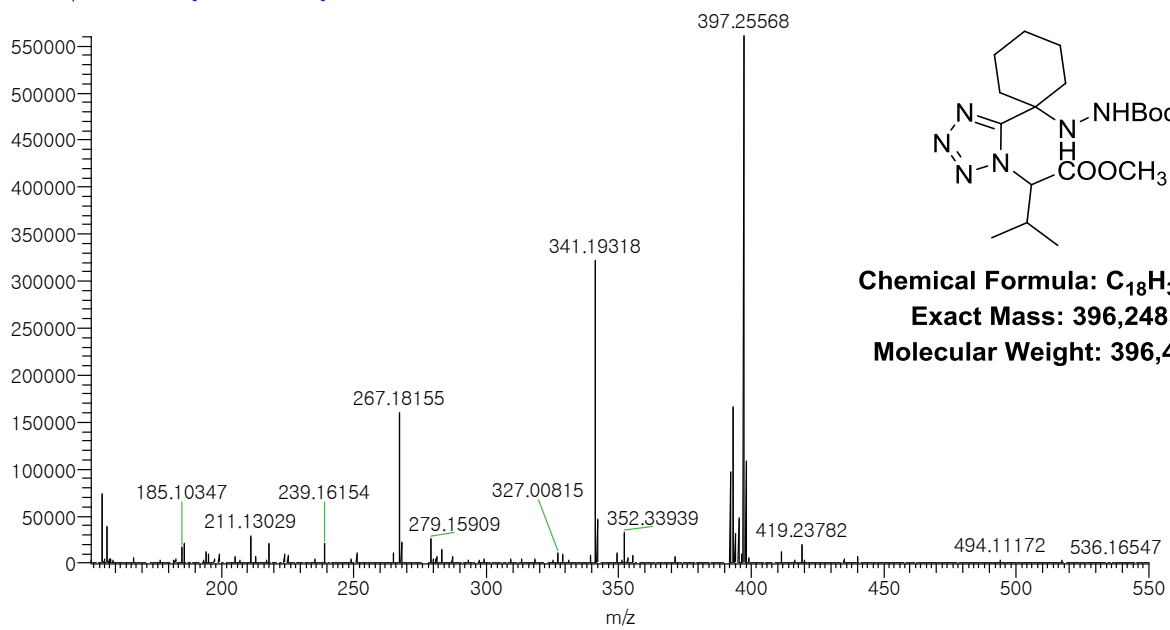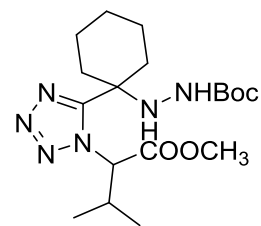

**Chemical Formula: C<sub>18</sub>H<sub>32</sub>N<sub>6</sub>O<sub>4</sub>**  
**Exact Mass: 396,24850**  
**Molecular Weight: 396,49200**

**8h: *tert*-butyl (5'-isopropyl-6'-oxo-5',6'-dihydro-7'*H*-spiro[cyclohexane-1,8'-tetrazolo[1,5-*a*]pyrazin]-7'-yl)carbamate**

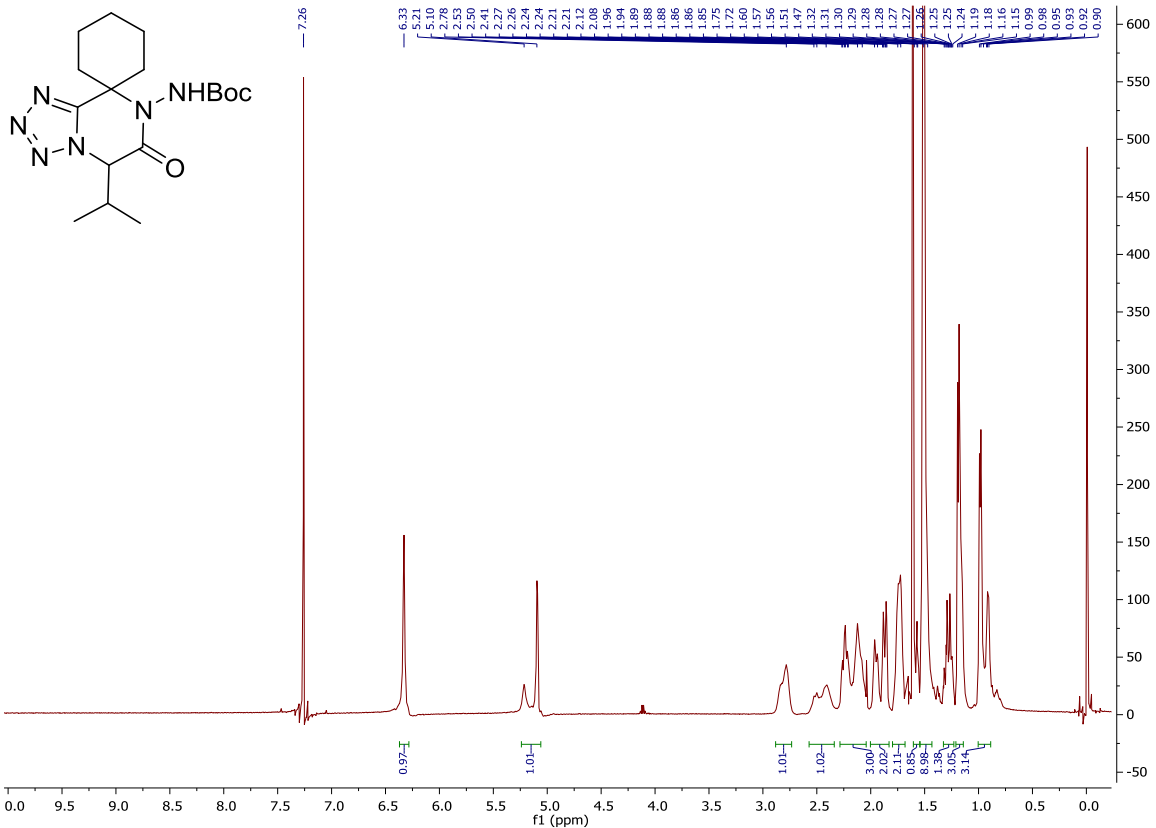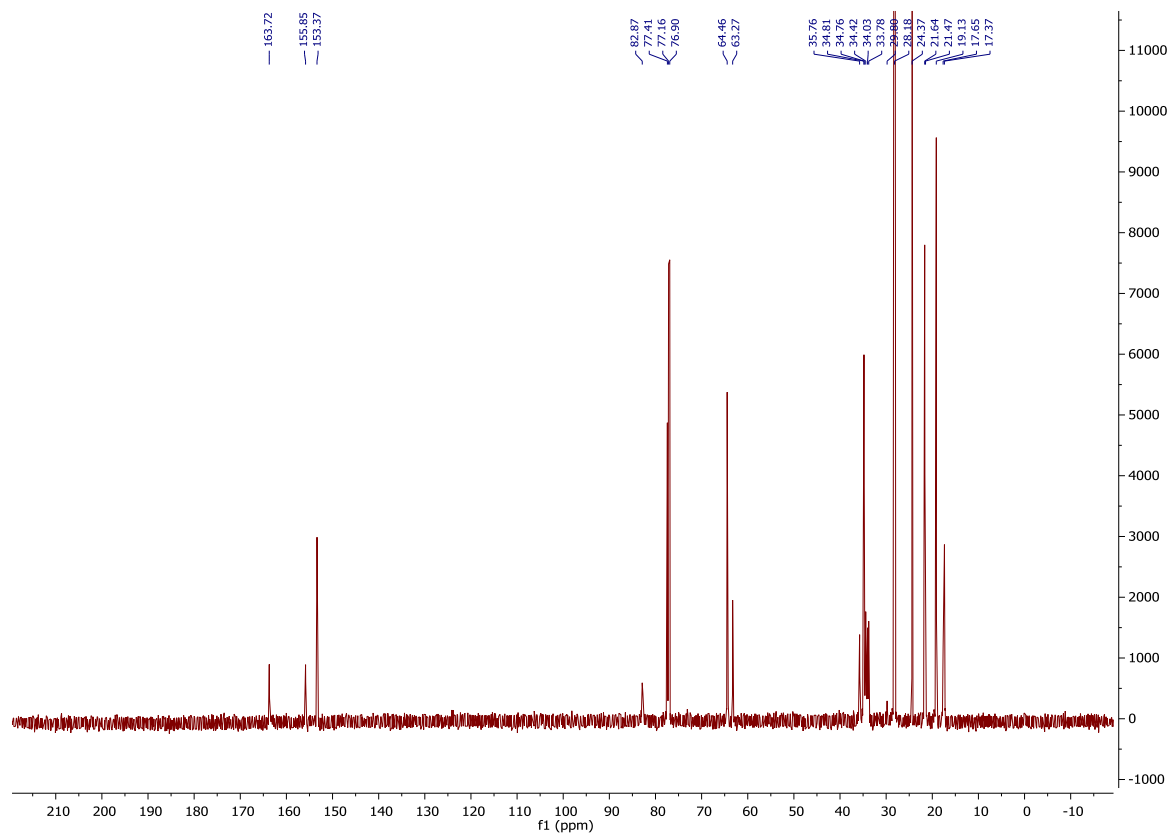

149boc #10-15 RT: 0.17454-0.25011 A'  
T: FTMS + p ESI Full ms [150.00-750.00]

.7

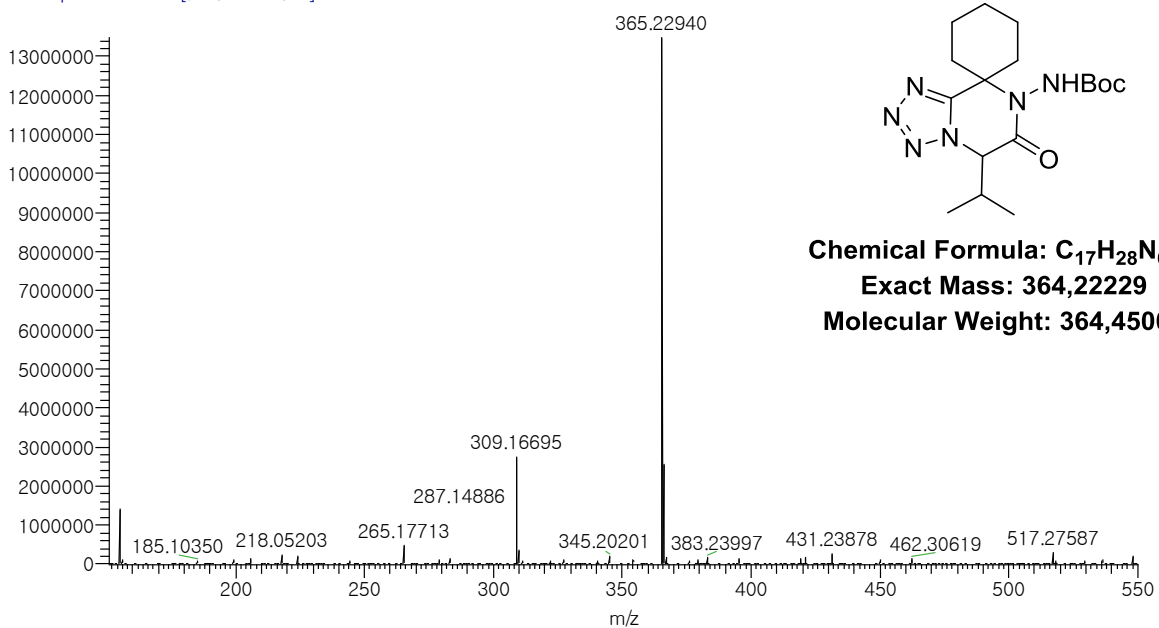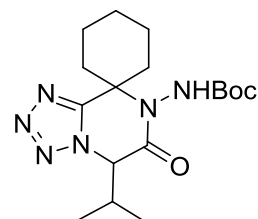

**Chemical Formula: C<sub>17</sub>H<sub>28</sub>N<sub>6</sub>O<sub>3</sub>**  
**Exact Mass: 364,22229**  
**Molecular Weight: 364,45000**



**5i: *tert*-butyl 2-(1-(1-(1-methoxy-3-methyl-1-oxobutan-2-yl)-1*H*-tetra-zol-5-yl)cyclopentyl) hydrazine-1-carboxylate**

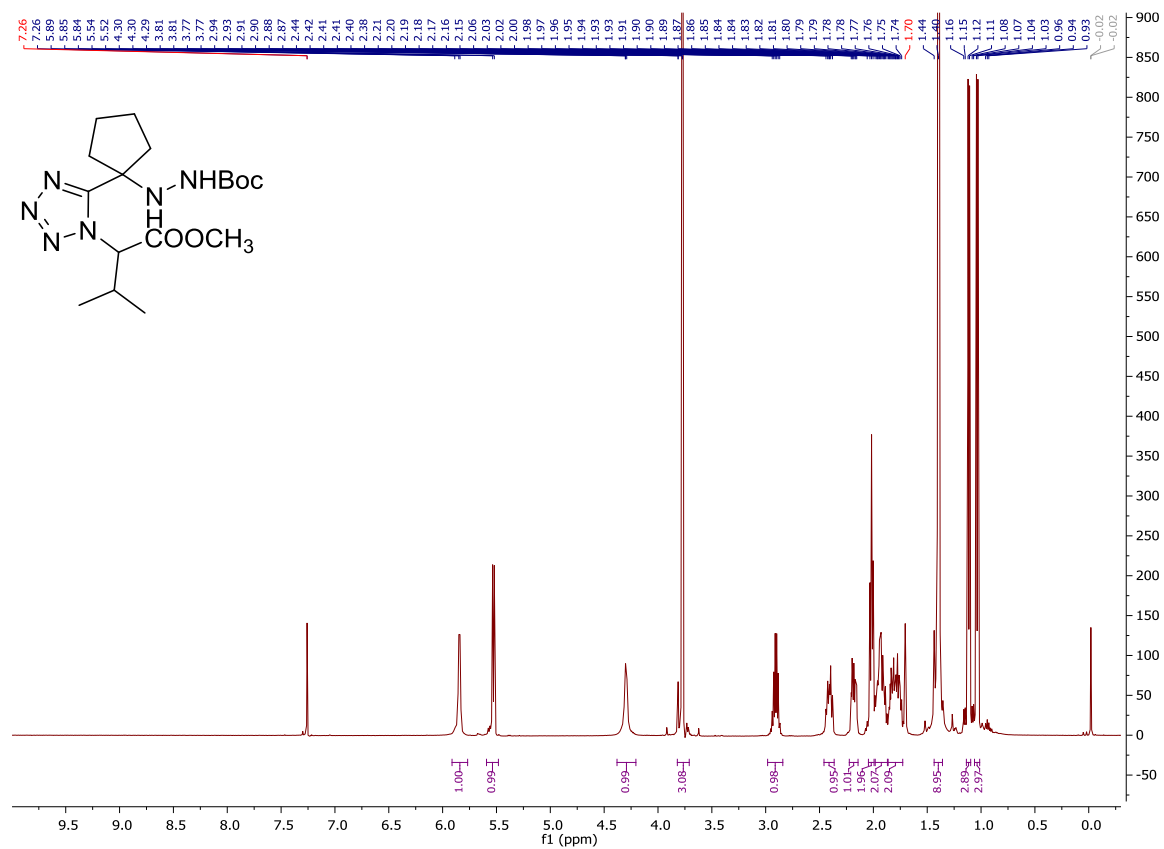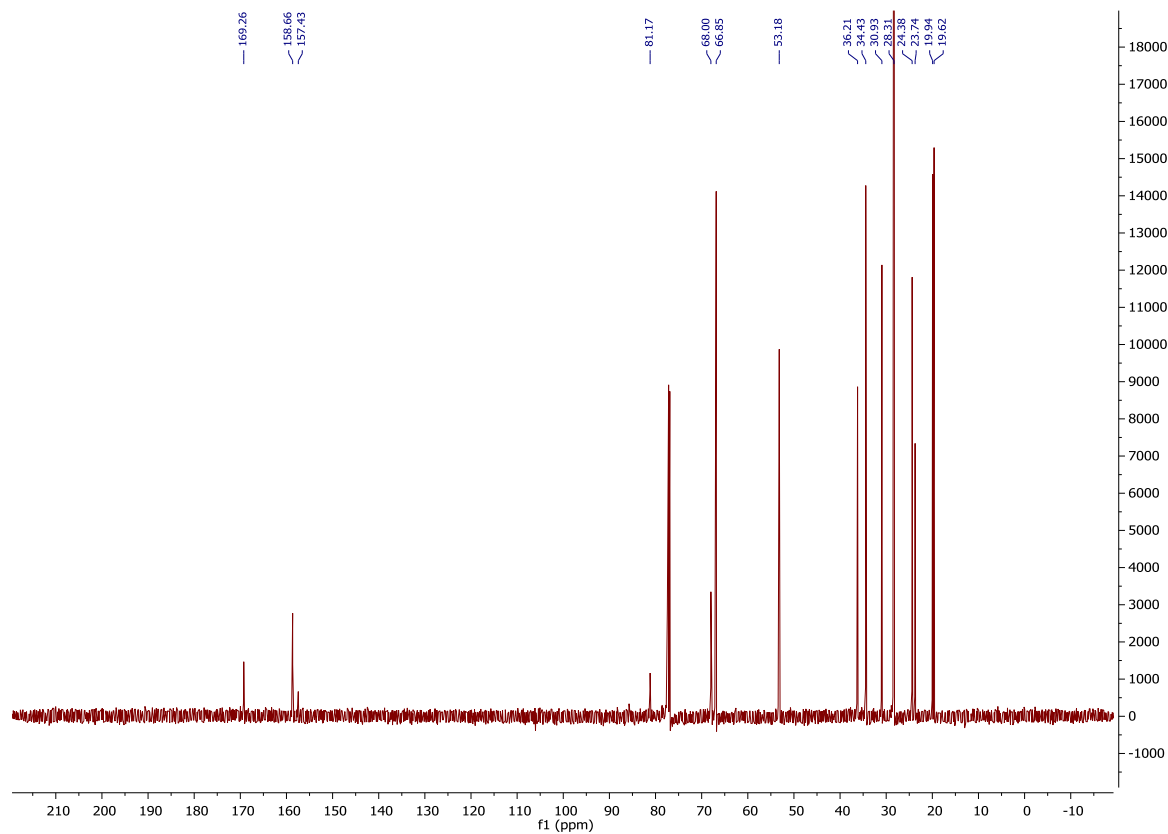

155ugi #11-15 RT: 0.18605-0.25467 Av  
T: FTMS + p ESI Full ms [150.00-750.00]

7

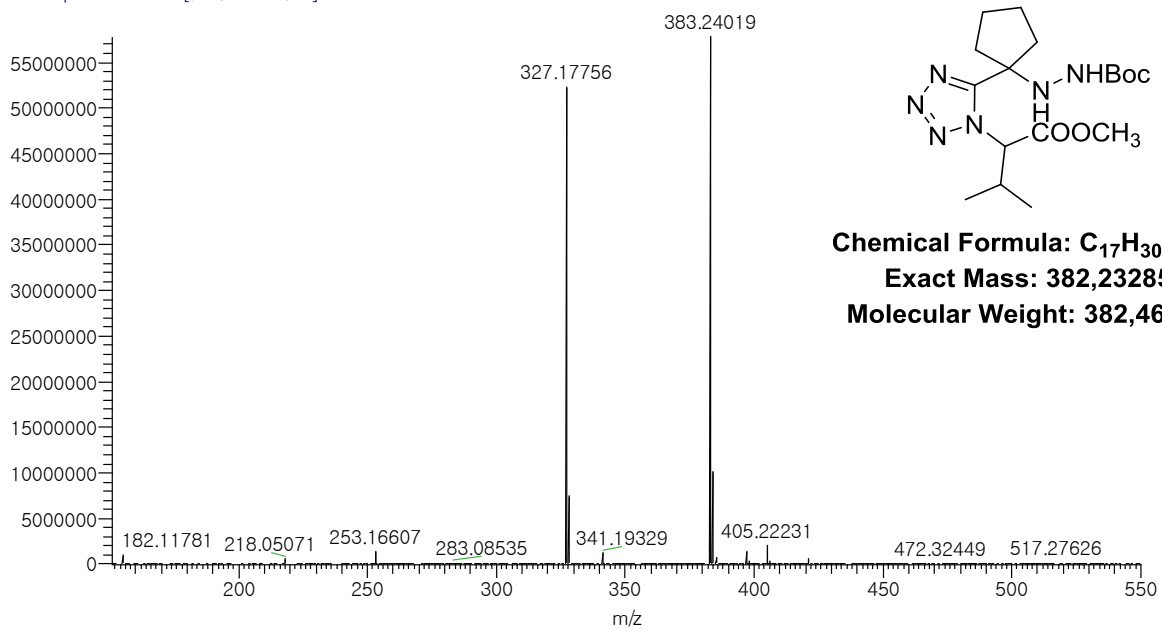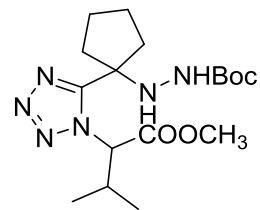

**Chemical Formula: C<sub>17</sub>H<sub>30</sub>N<sub>6</sub>O<sub>4</sub>**  
**Exact Mass: 382,23285**  
**Molecular Weight: 382,46500**

**8i: *tert*-butyl (5'-isopropyl-6'-oxo-5',6'-dihydro-7'*H*-spiro [cyclopentane-1,8'-tetrazolo[1,5-*a*]pyrazin]-7'-yl)carbamate**

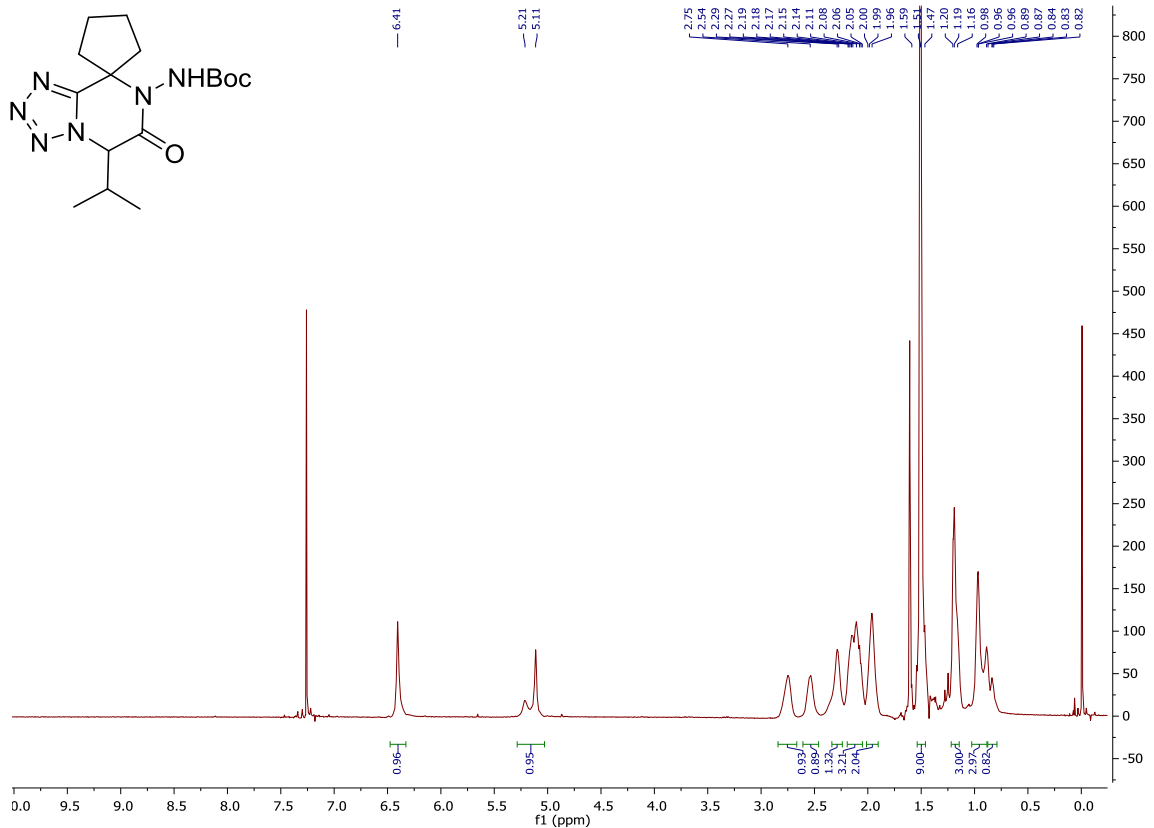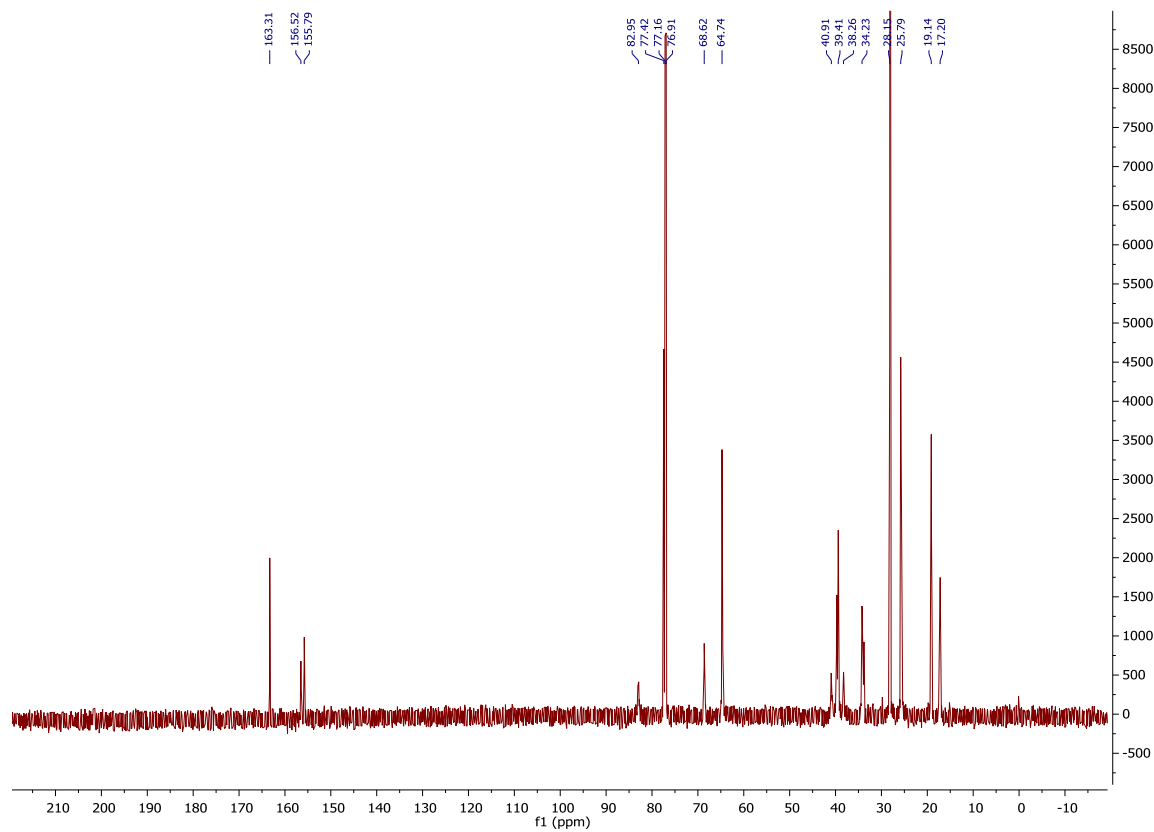

155boc #10-15 RT: 0.17489-0.25078 A'  
T: FTMS + p ESI Full ms [150.00-750.00]

.7

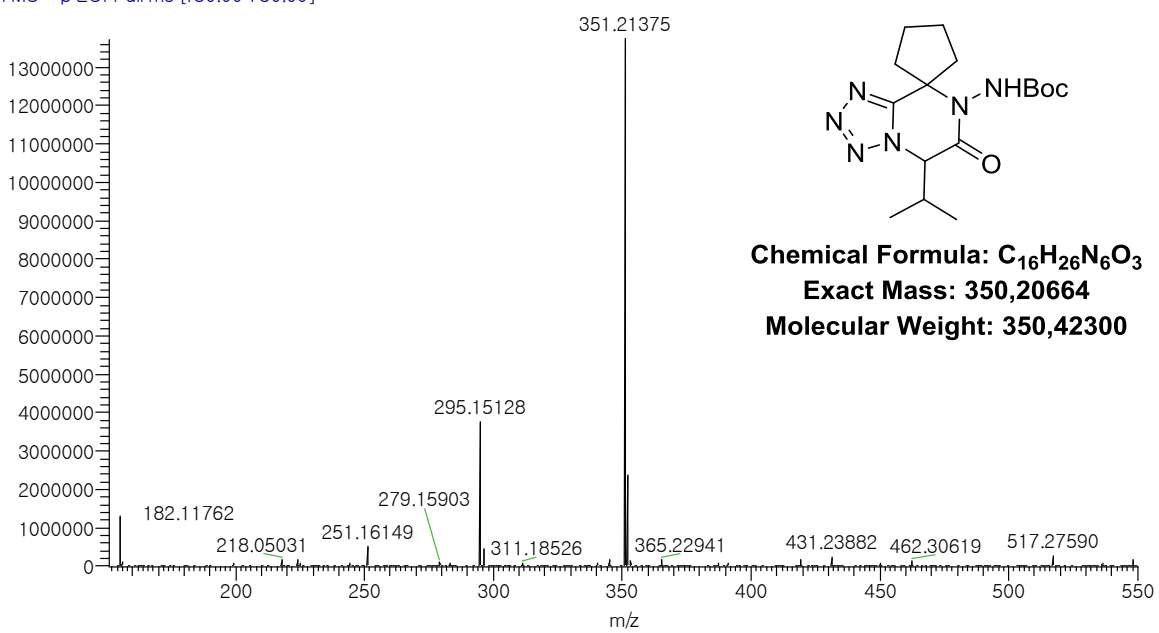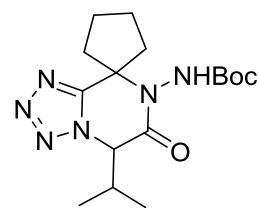

**Chemical Formula: C<sub>16</sub>H<sub>26</sub>N<sub>6</sub>O<sub>3</sub>**  
**Exact Mass: 350,20664**  
**Molecular Weight: 350,42300**

**5j: benzyl 4-(2-(*tert*-butoxycarbonyl)hydrazineyl)-4-(1-(1-methoxy-4-methyl-1-oxopentan-2-yl)-1*H*-tetrazol-5-yl)piperidine-1-carboxylate**

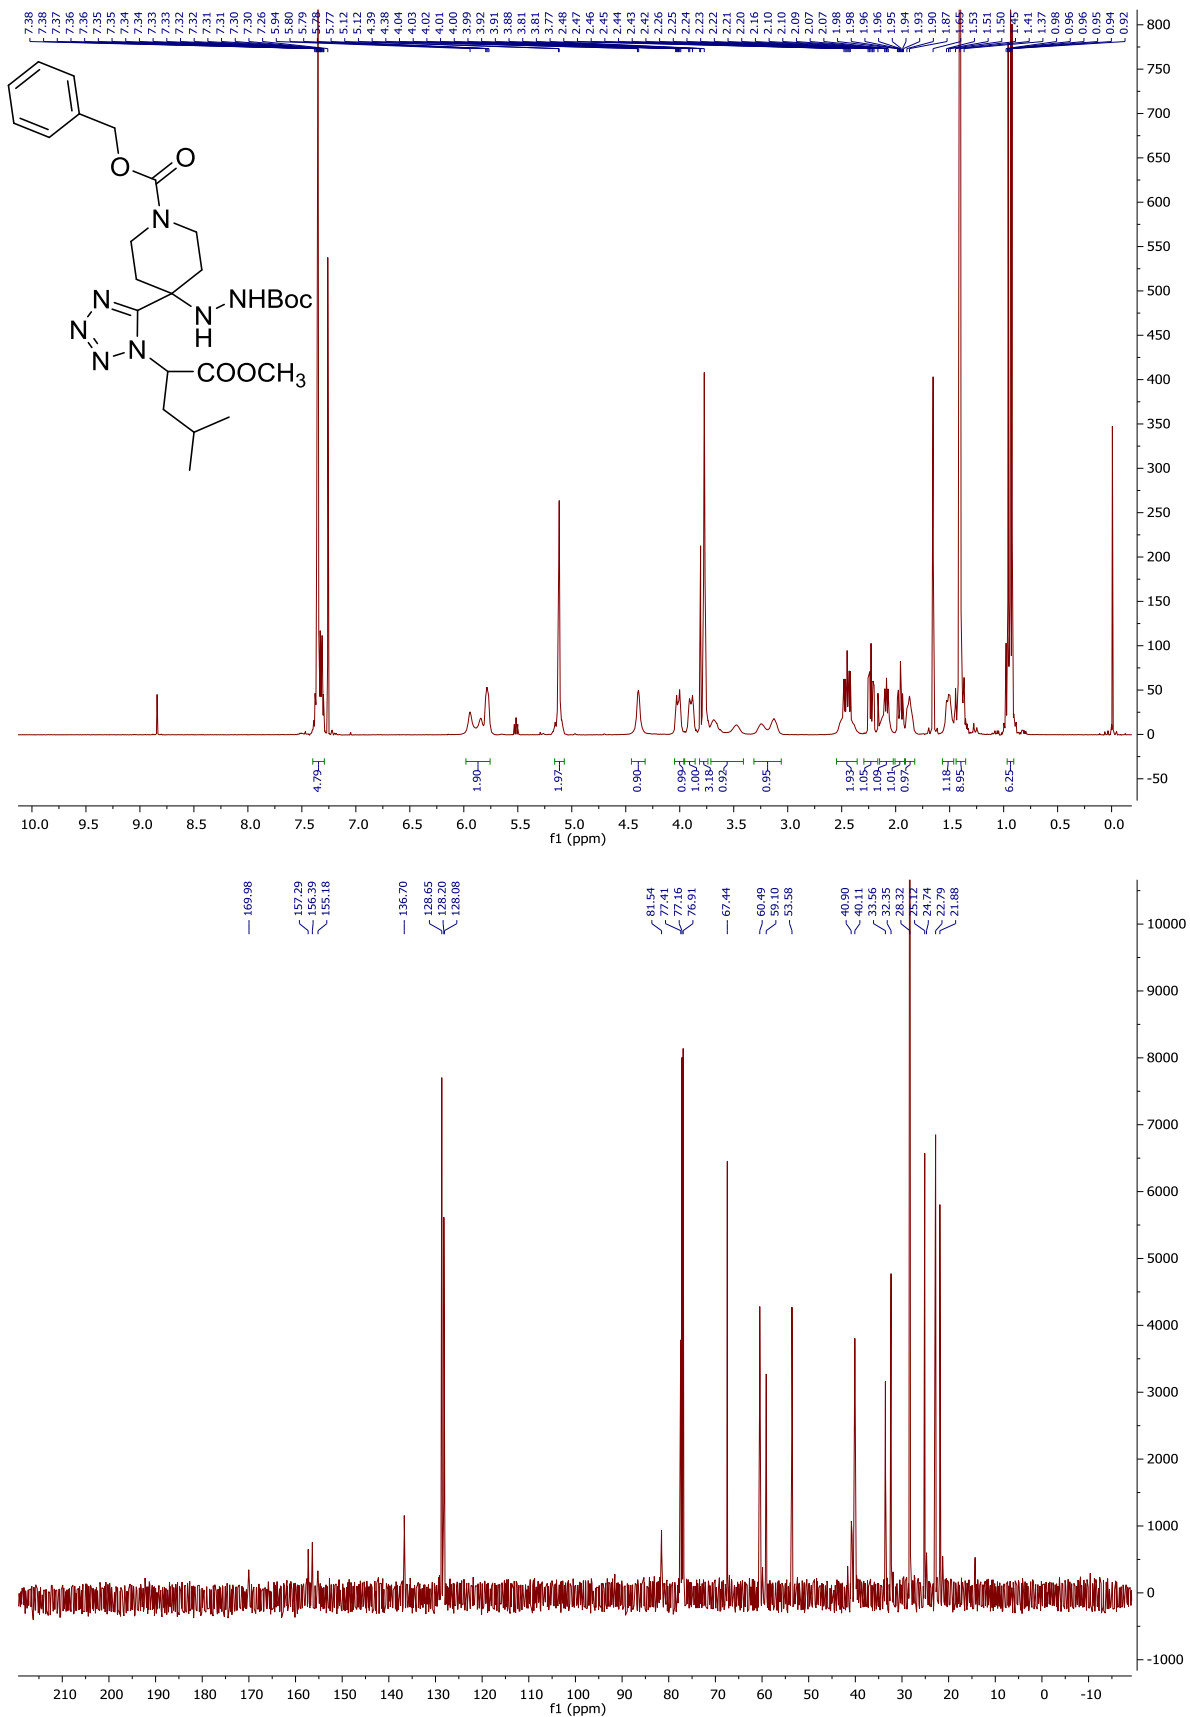

168ugi #19-23 RT: 0.32656-0.40636 AV  
T: FTMS + p ESI Full ms [150.00-750.00]

3

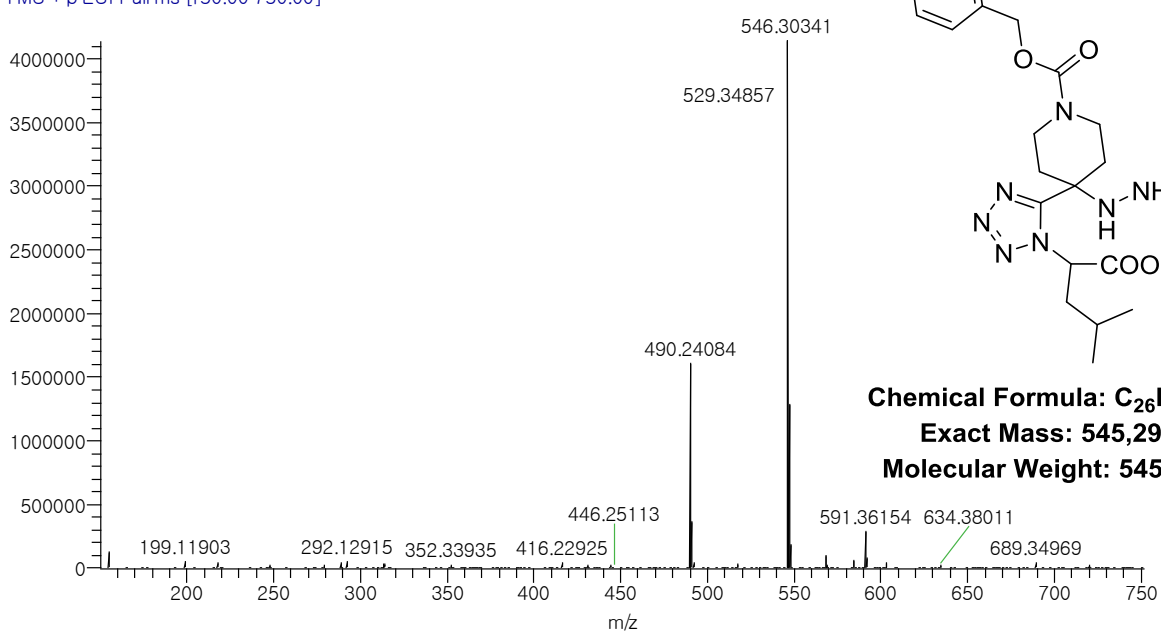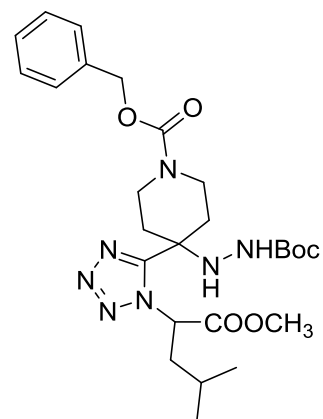

**Chemical Formula: C<sub>26</sub>H<sub>39</sub>N<sub>7</sub>O<sub>6</sub>**  
**Exact Mass: 545,29618**  
**Molecular Weight: 545,64100**

**8j: benzyl 7'-((*tert*-butoxycarbonyl)amino)-5'-isobutyl-6'-oxo-6',7'-dihydro-5'*H*-spiro [piperidine-4,8'-tetrazolo[1,5-*a*]pyrazine]-1-carboxylate**

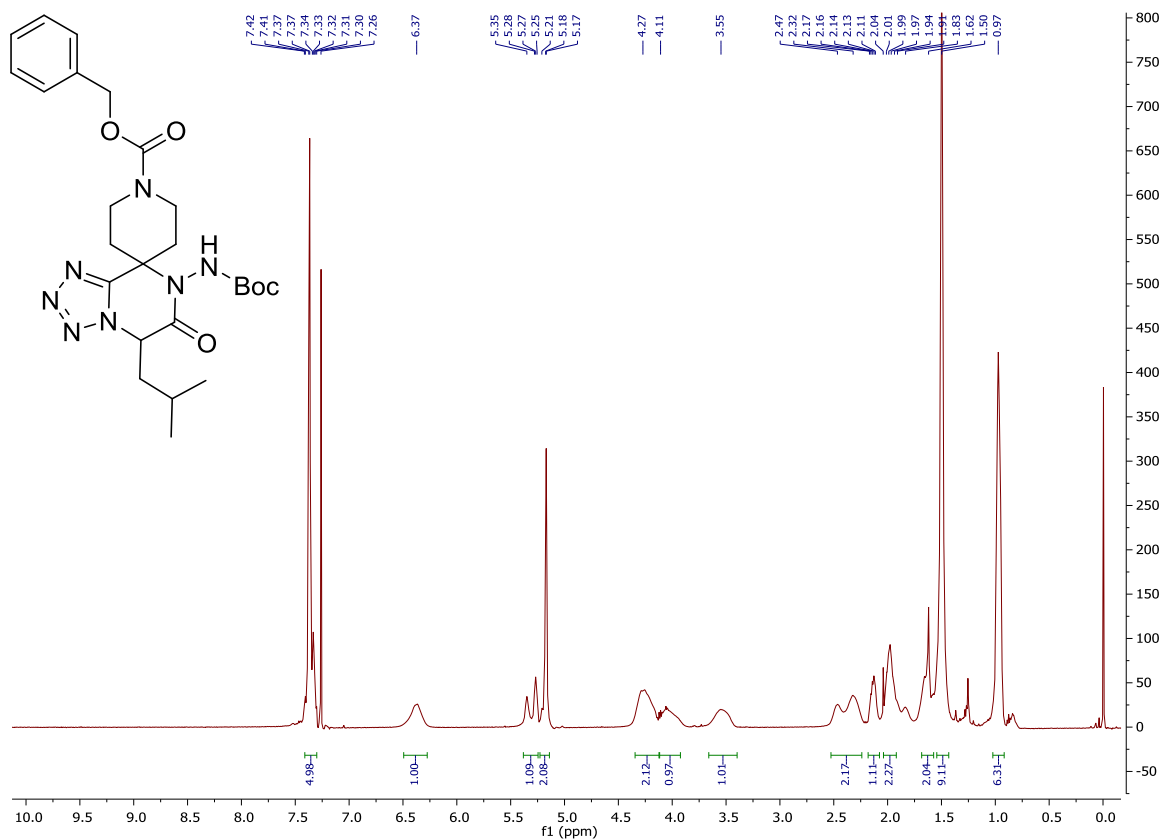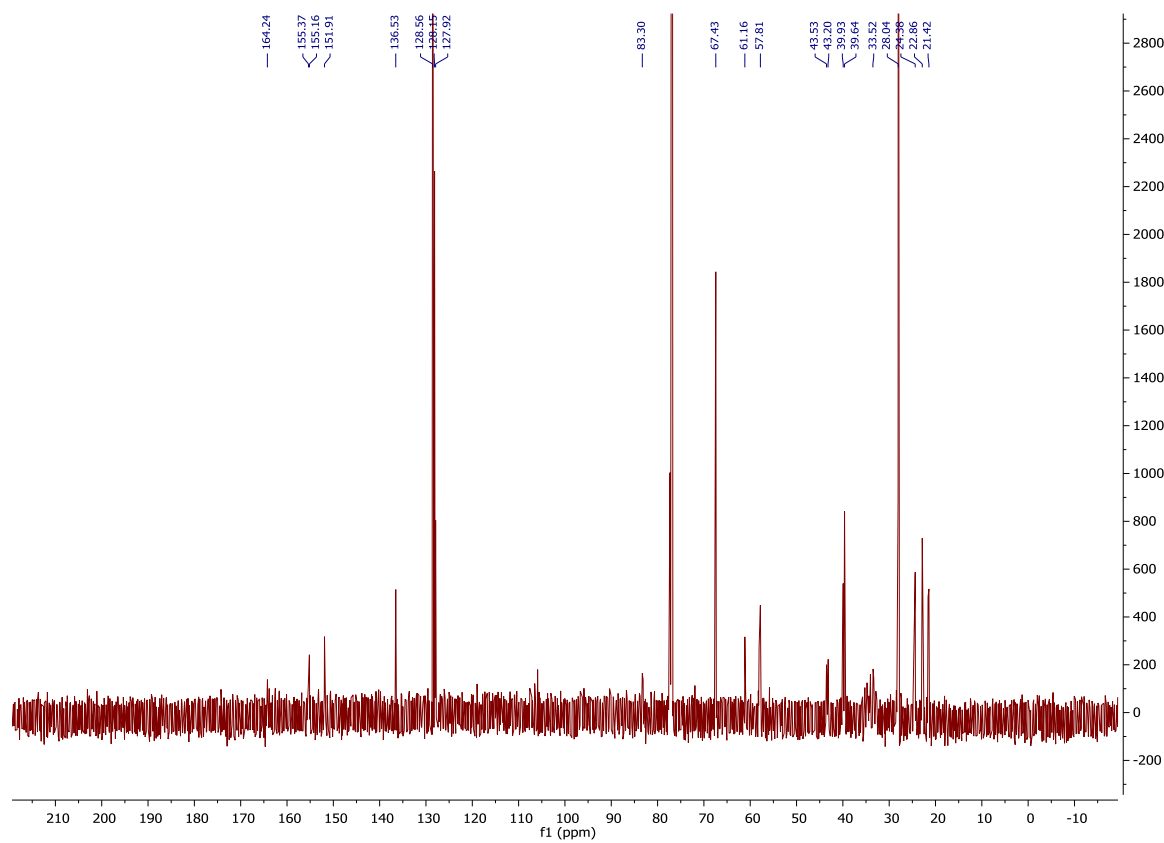

168boc #10 RT: 0.16865 AV: 1 NL: 9.  
T: FTMS + p ESI Full ms [150.00-750.00]

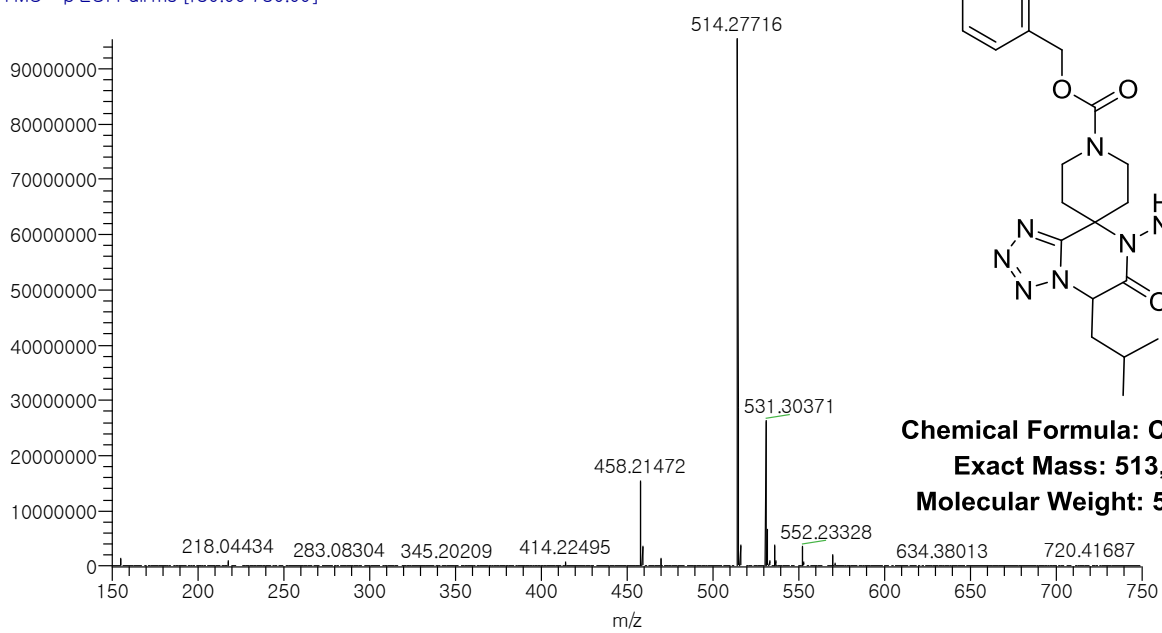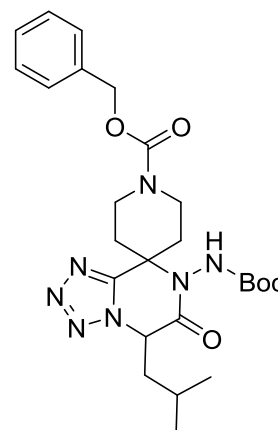

**Chemical Formula: C<sub>25</sub>H<sub>35</sub>N<sub>7</sub>O<sub>5</sub>**  
**Exact Mass: 513,26997**  
**Molecular Weight: 513,59900**



**5k: *tert*-butyl 2-(1-(1-(1-methoxy-2-methyl-1-oxopropan-2-yl)-1*H*-tetrazol-5-yl)cyclohexyl) hydrazine-1-carboxylate**

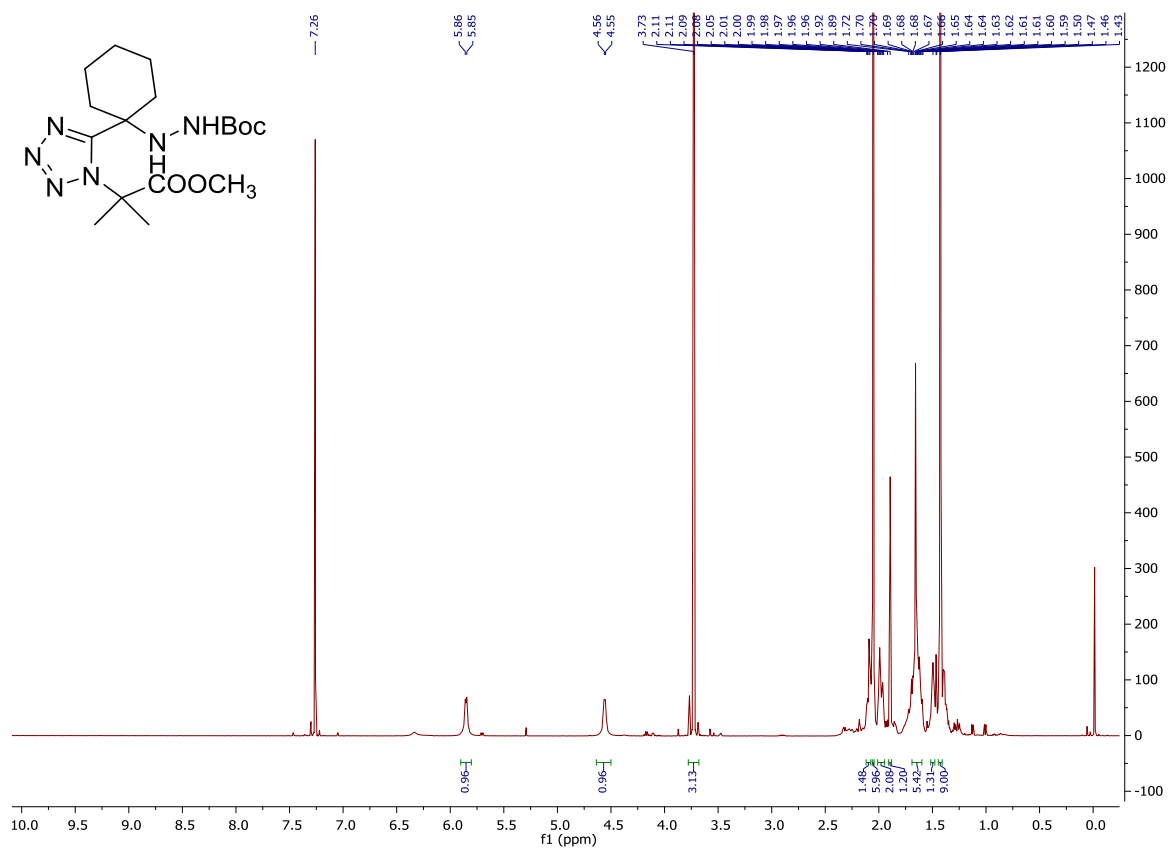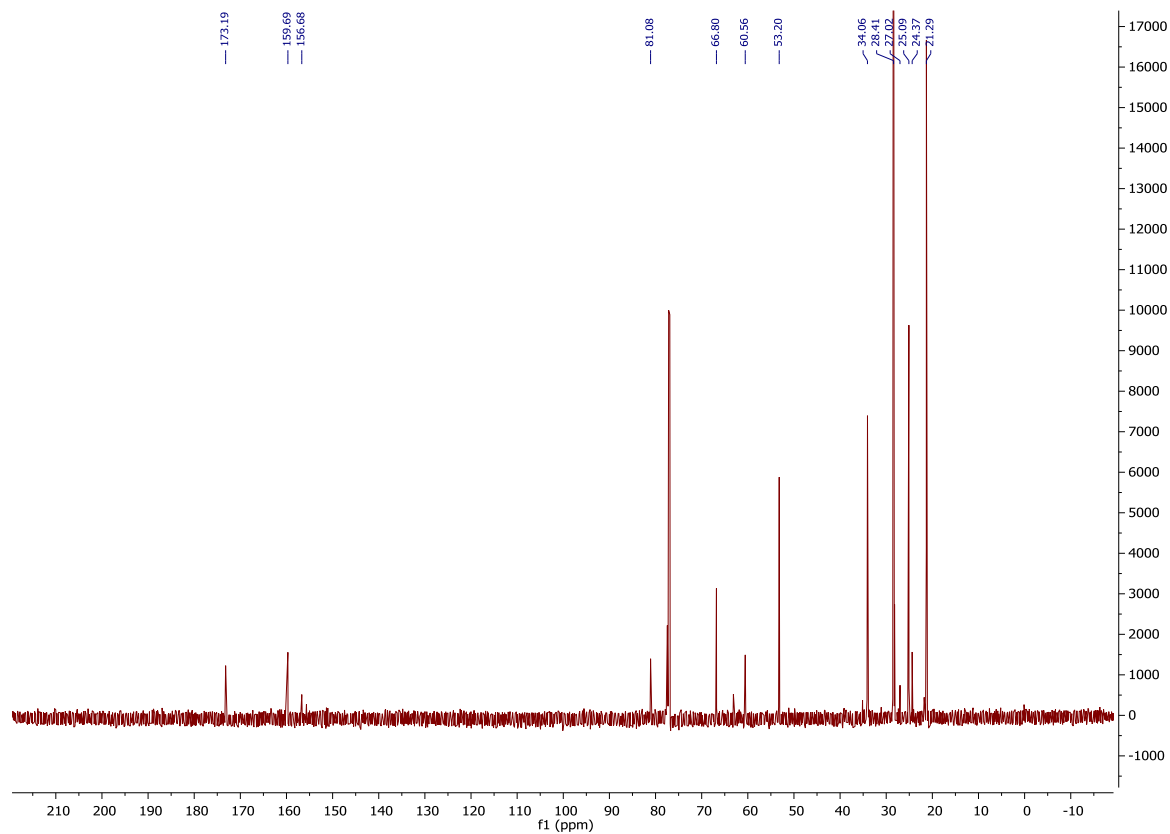

160ugi #10 RT: 0.17034 AV: 1 NL: 3.6  
T: FTMS + pESI Full ms [150.00-750.00]

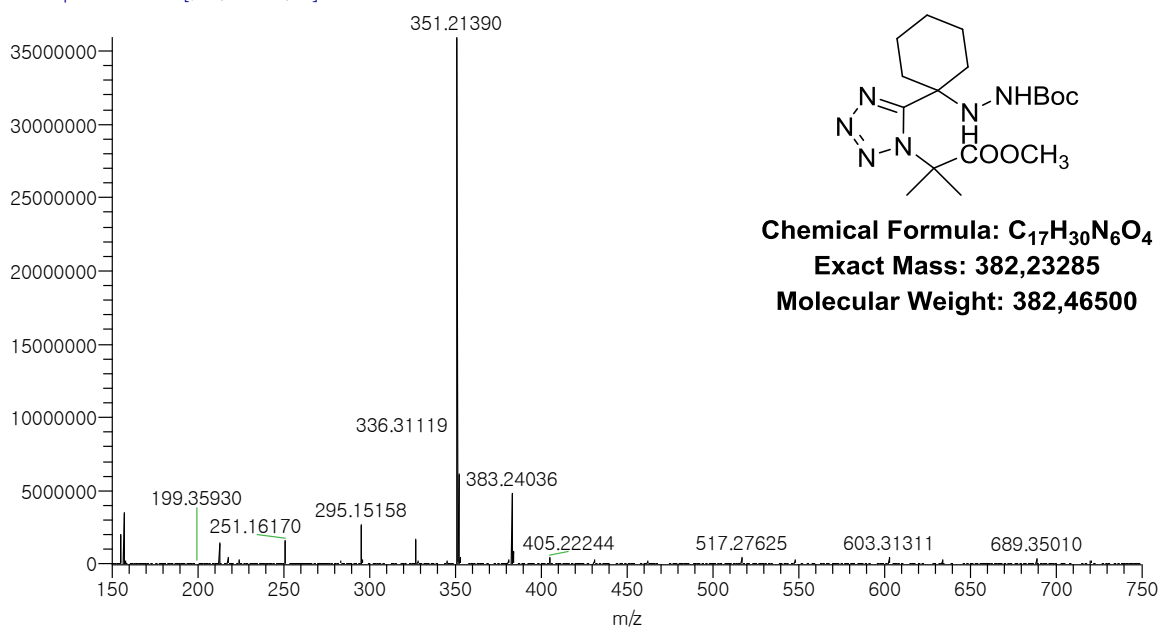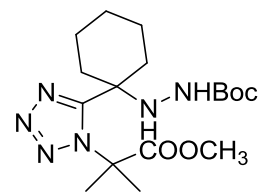

**Chemical Formula: C<sub>17</sub>H<sub>30</sub>N<sub>6</sub>O<sub>4</sub>**  
**Exact Mass: 382,23285**  
**Molecular Weight: 382,46500**

**8k: *tert*-butyl (5',5'-dimethyl-6'-oxo-5',6'-dihydro-7'*H*-spiro[cyclo-hex-ane-1,8'-tetrazolo[1,5-a] pyrazin]-7'-yl)carbamate**

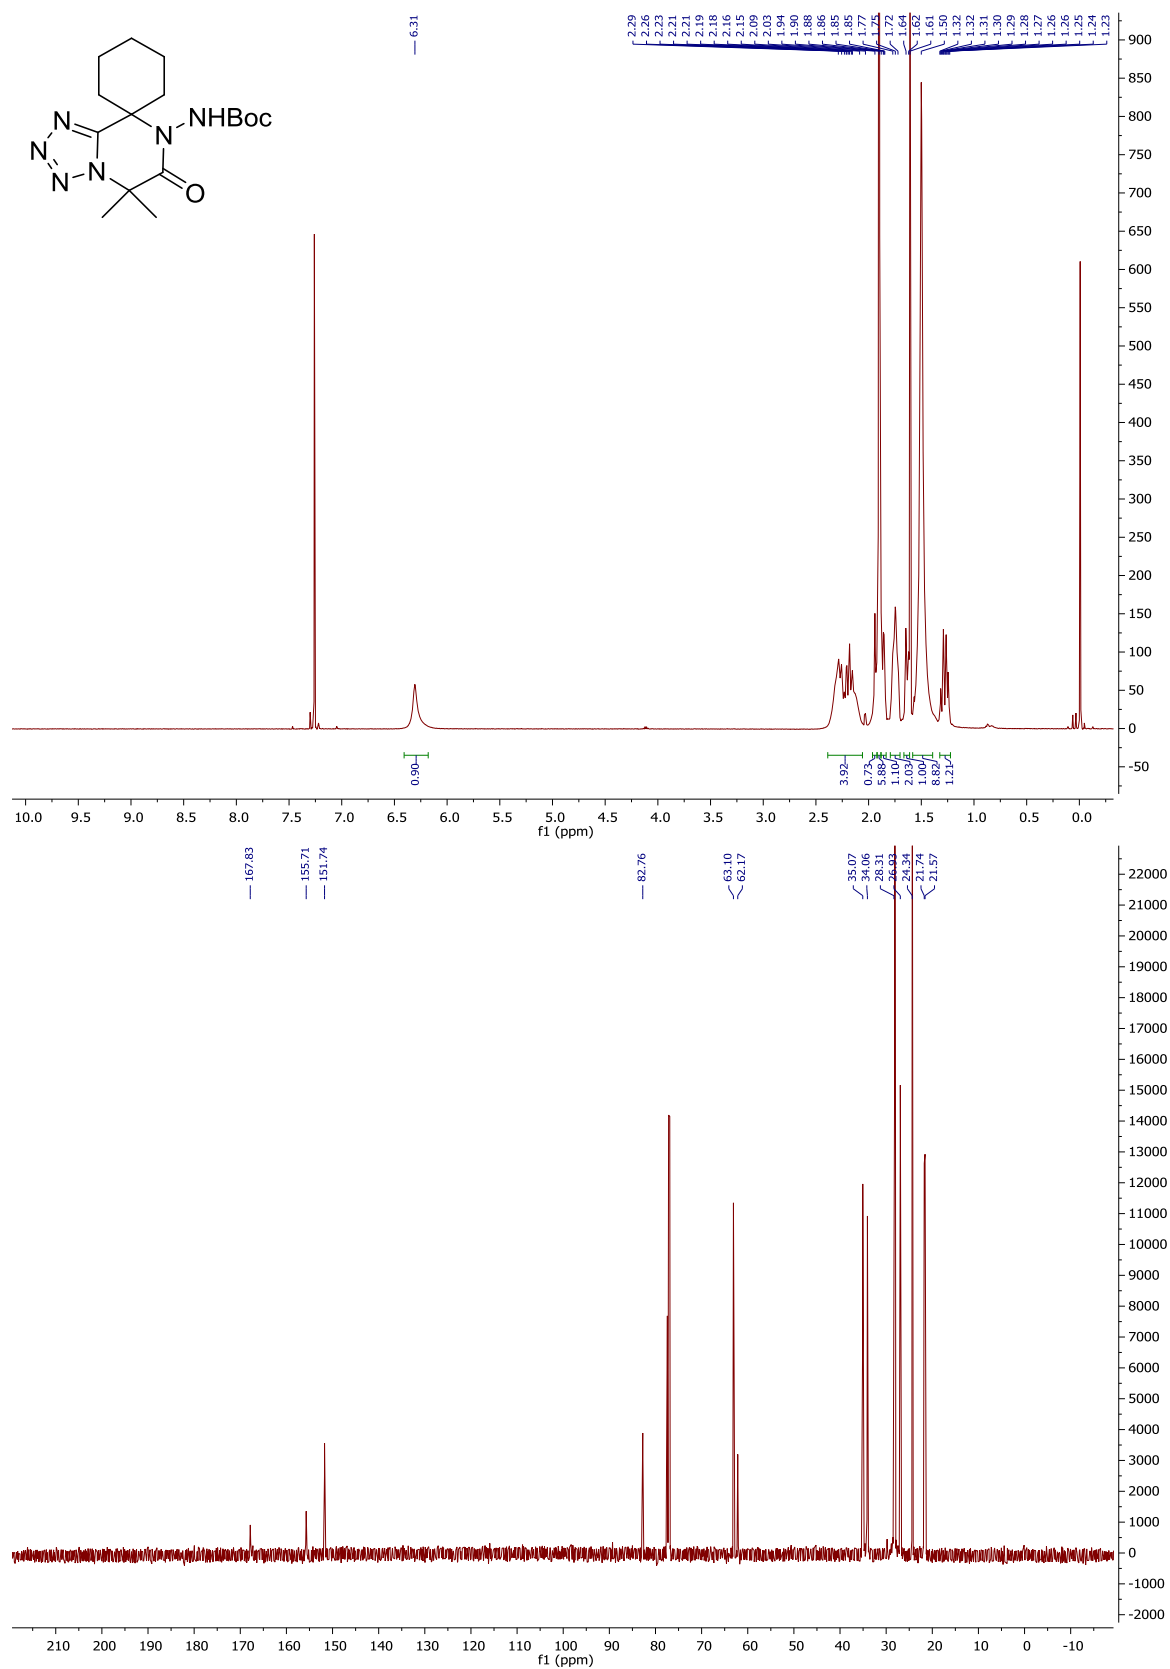

160boc #9 RT: 0.15964 AV: 1 NL: 1.8  
T: FTMS + p ESI Full ms [150.00-750.00]

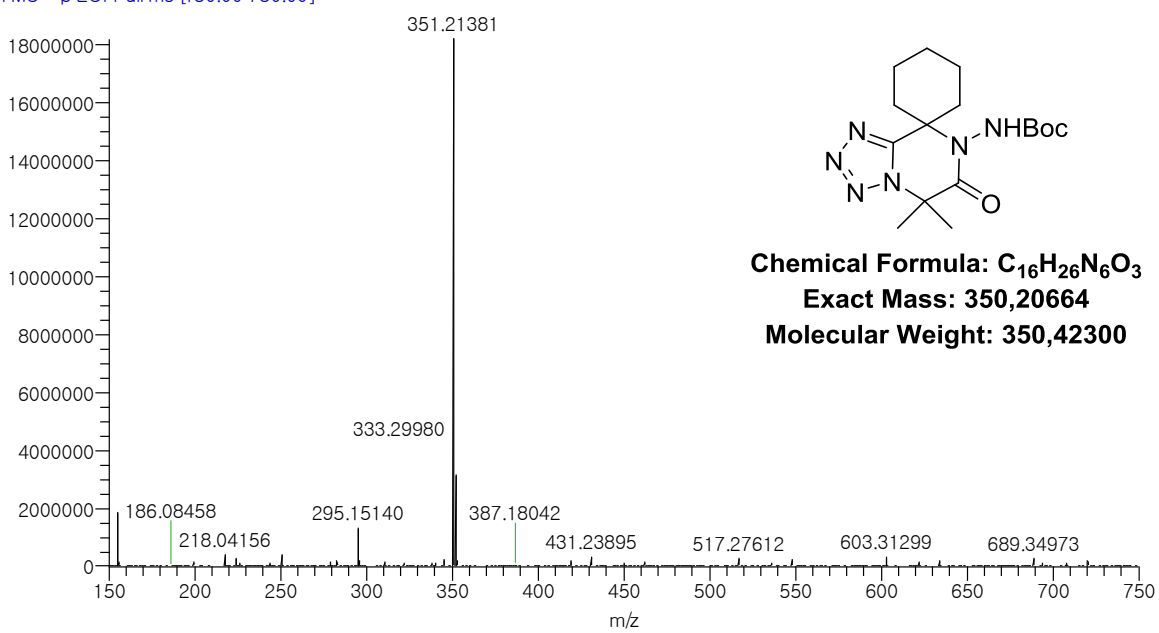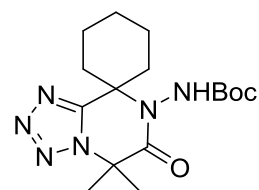

**Chemical Formula: C<sub>16</sub>H<sub>26</sub>N<sub>6</sub>O<sub>3</sub>**  
**Exact Mass: 350,20664**  
**Molecular Weight: 350,42300**

**5l: *tert*-butyl 2-(2-(1-(3-(1*H*-indol-3-yl)-1-methoxy-1-oxopropan-2-yl)-1*H*-tetrazol-5-yl)propan-2-yl)hydrazine-1-carboxylate**

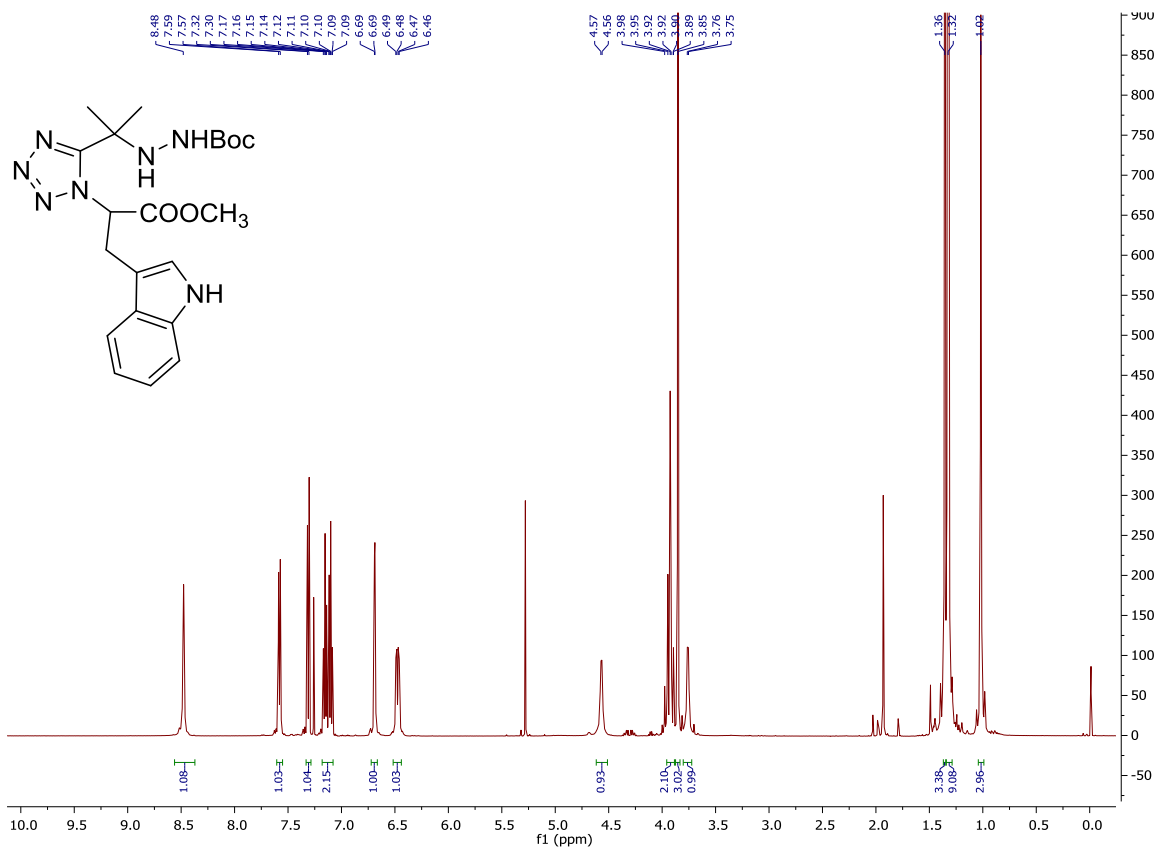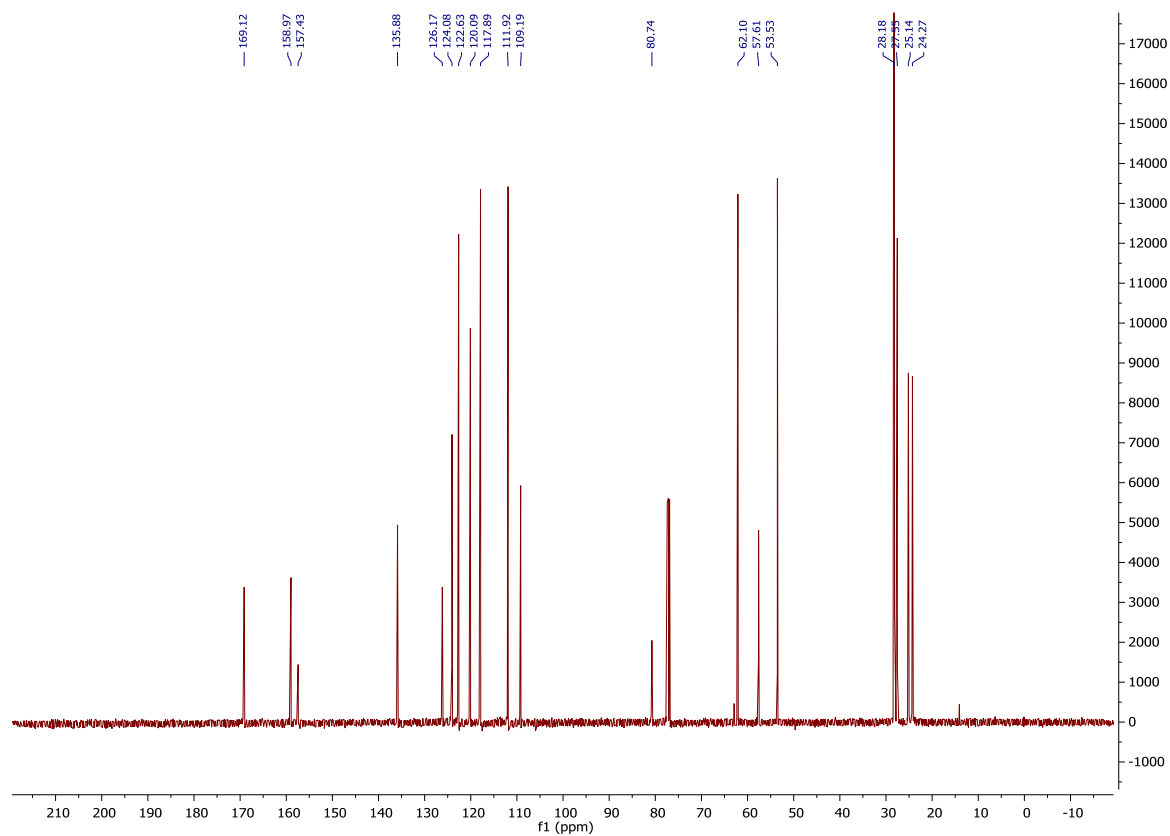

176ugi #5 RT: 0.08288 AV: 1 NL: 9.82  
T: FTMS + pESI Full ms [150.00-750.00]

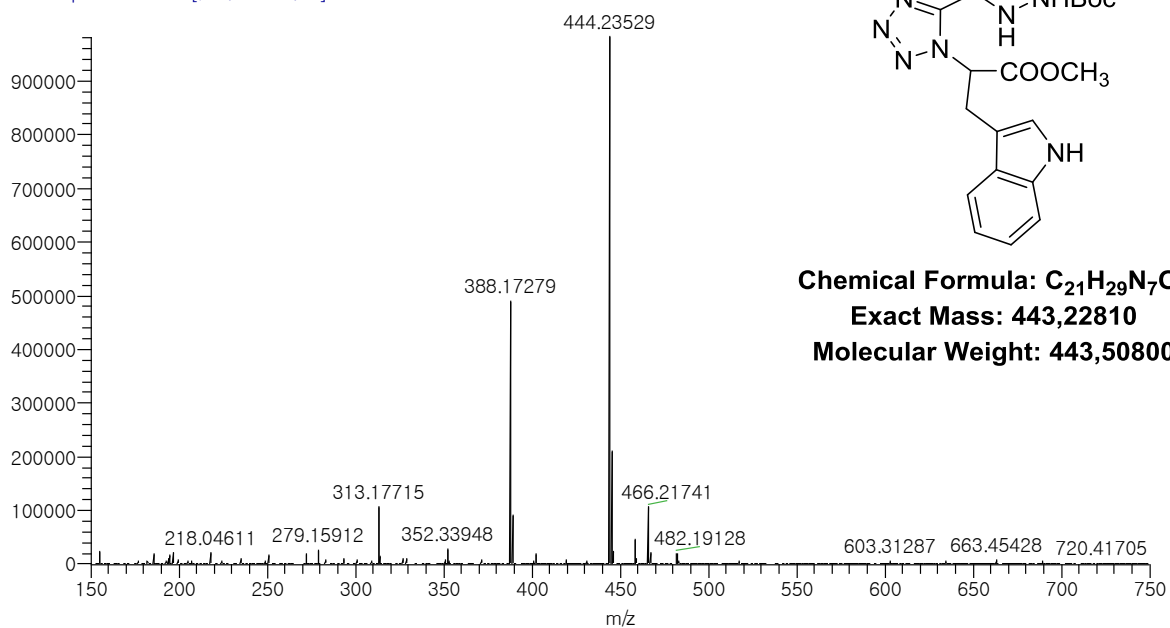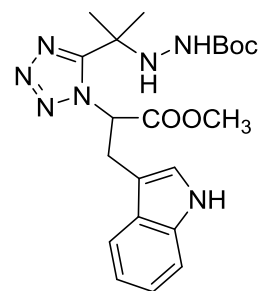

**Chemical Formula: C<sub>21</sub>H<sub>29</sub>N<sub>7</sub>O<sub>4</sub>**  
**Exact Mass: 443,22810**  
**Molecular Weight: 443,50800**

**8l: *tert*-butyl (5-((1*H*-indol-3-yl)methyl)-8,8-dimethyl-6-oxo-5,6-dihydro-1,2,4-triazolo[1,5-a]pyrazine-7(8*H*)-yl)carbamate**

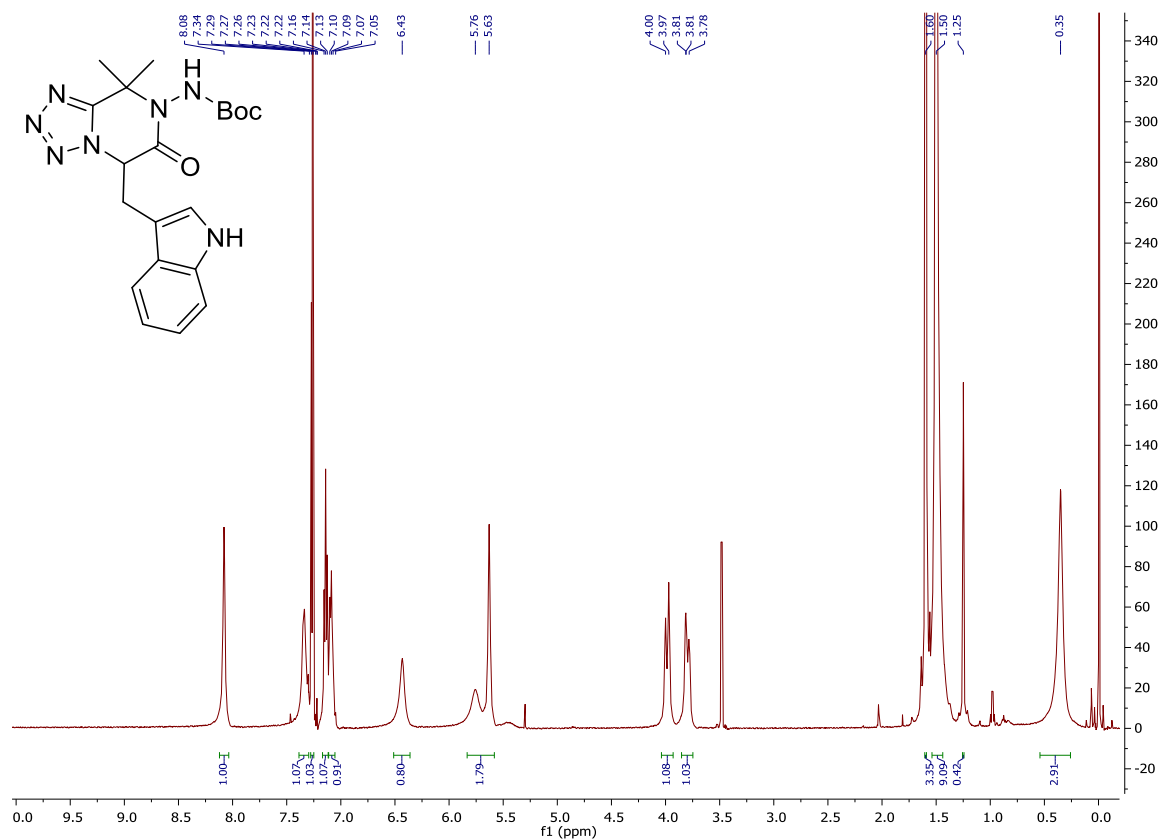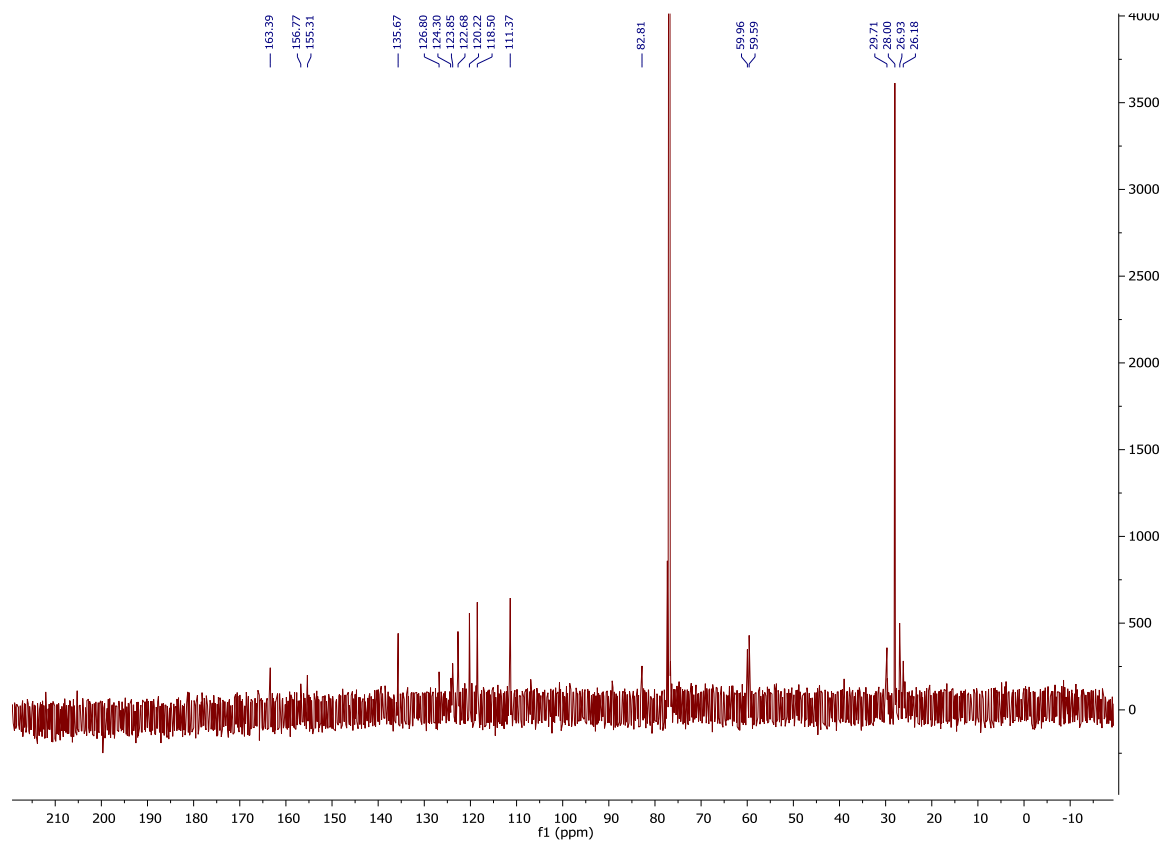

176boc #17 RT: 0.29393 AV: 1 NL: 4.1  
T: FTMS + p ESI Full ms [150.00-750.00]

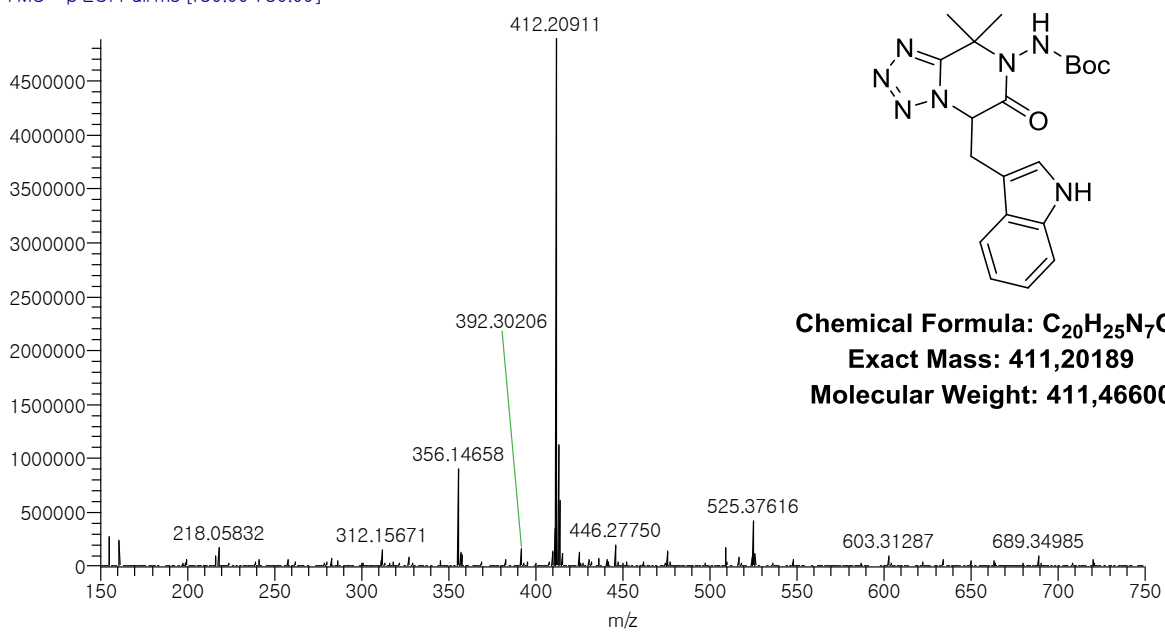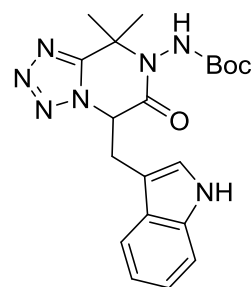

**Chemical Formula: C<sub>20</sub>H<sub>25</sub>N<sub>7</sub>O<sub>3</sub>**  
**Exact Mass: 411,20189**  
**Molecular Weight: 411,46600**



9a: 7'-amino-5'-isobutyl-5'H-spiro[cyclopentane-1,8'-tetrazolo[1,5-a]pyrazin]-6'(7'H)-one hydrochloride

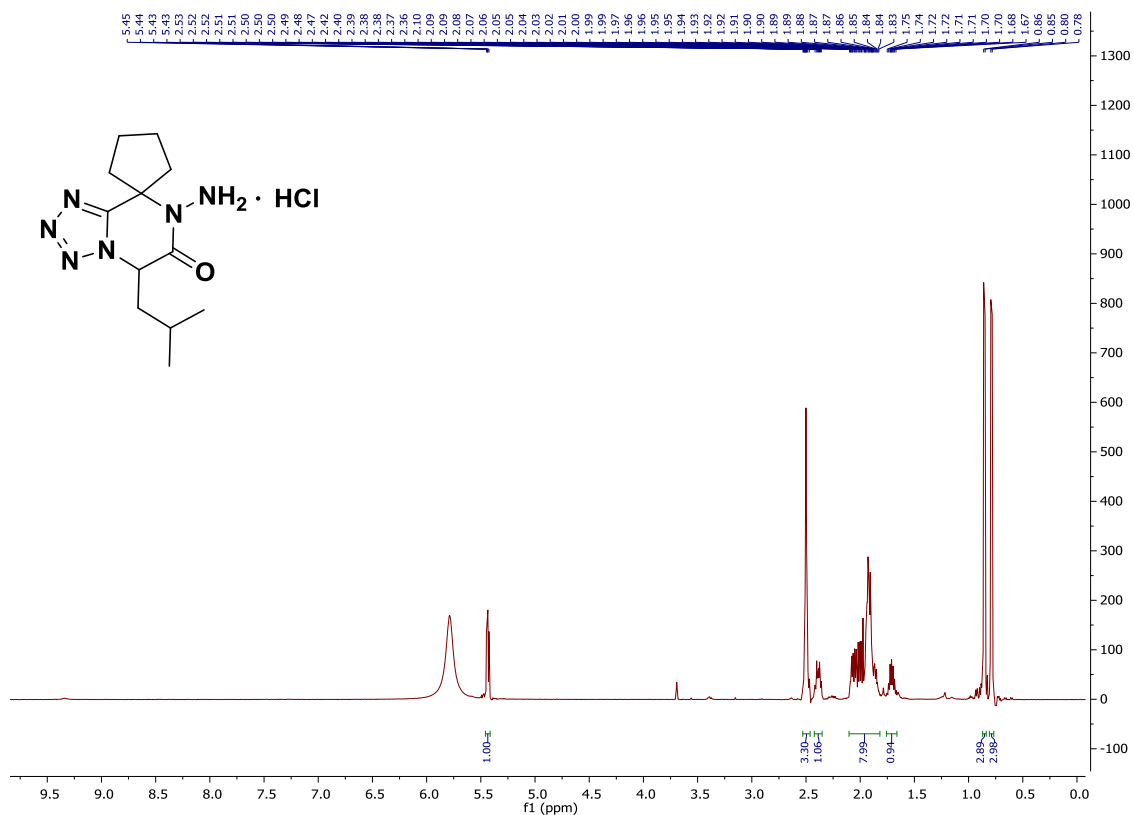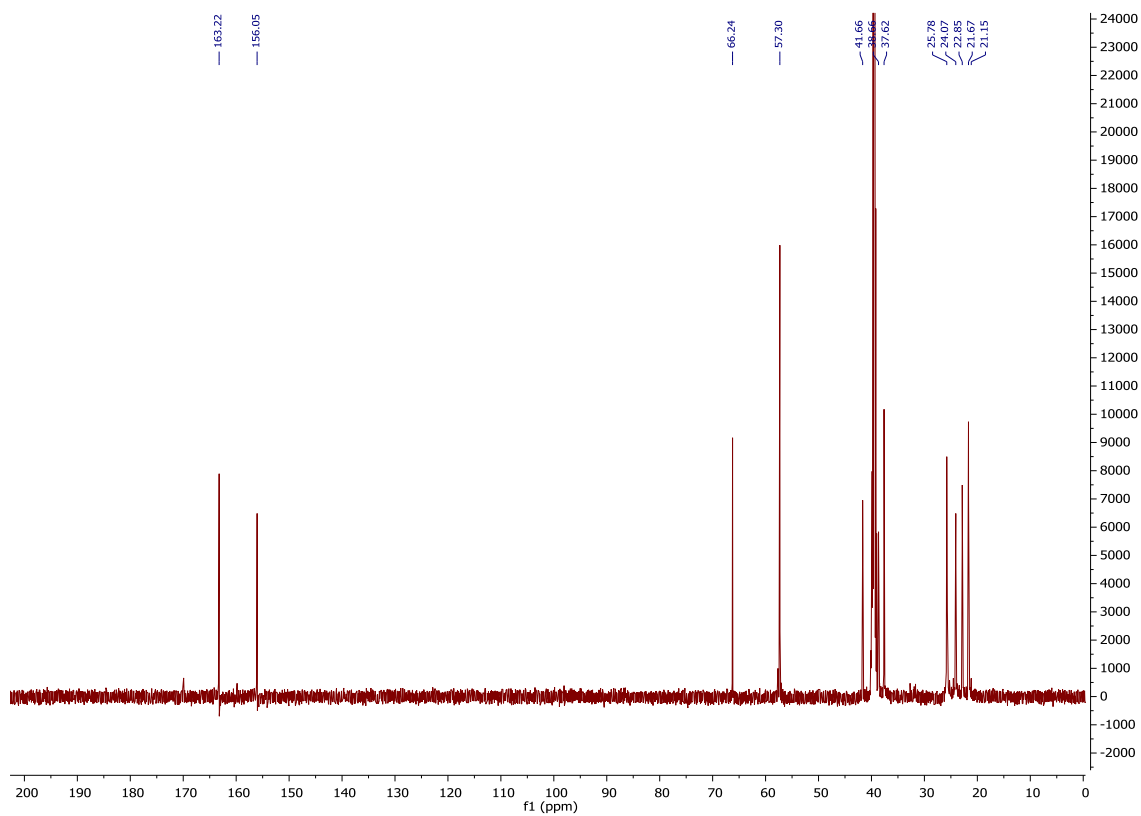

20170206\_ 17MDV021\_ YZ156 #217  
T: FTMS + p ESI Full ms [100.00-1000.00]

V: 1 NL: 2.55E7

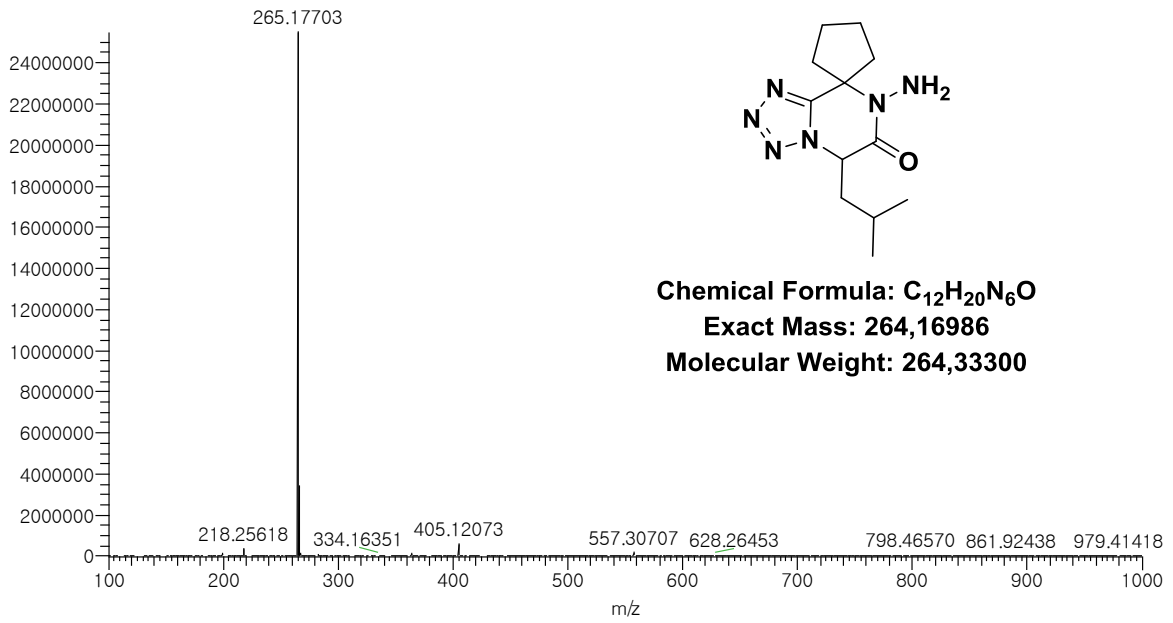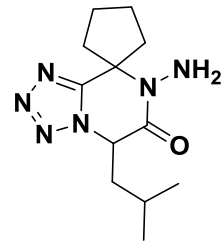

**Chemical Formula: C<sub>12</sub>H<sub>20</sub>N<sub>6</sub>O**  
**Exact Mass: 264,16986**  
**Molecular Weight: 264,33300**



yz174 #160 RT: 3.41379 AV: 1 NL: 2.2  
T: FTMS + p ESI Full ms [100.00-1000.00]

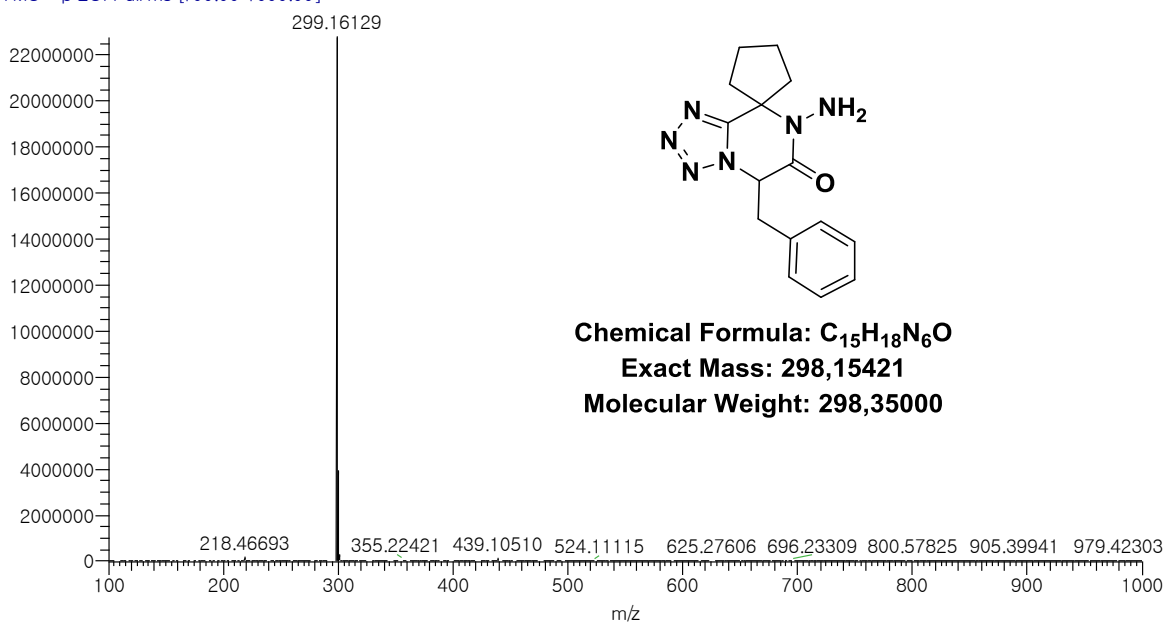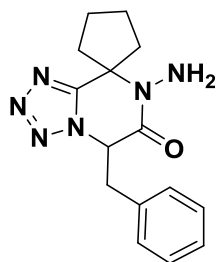

**Chemical Formula: C<sub>15</sub>H<sub>18</sub>N<sub>6</sub>O**

**Exact Mass: 298,15421**

**Molecular Weight: 298,35000**

9c: 7'-amino-5'-isopropyl-5'H-spiro[cyclopentane-1,8'-tetrazolo[1,5-a]pyrazin]-6'(7'H)-one hydrochloride

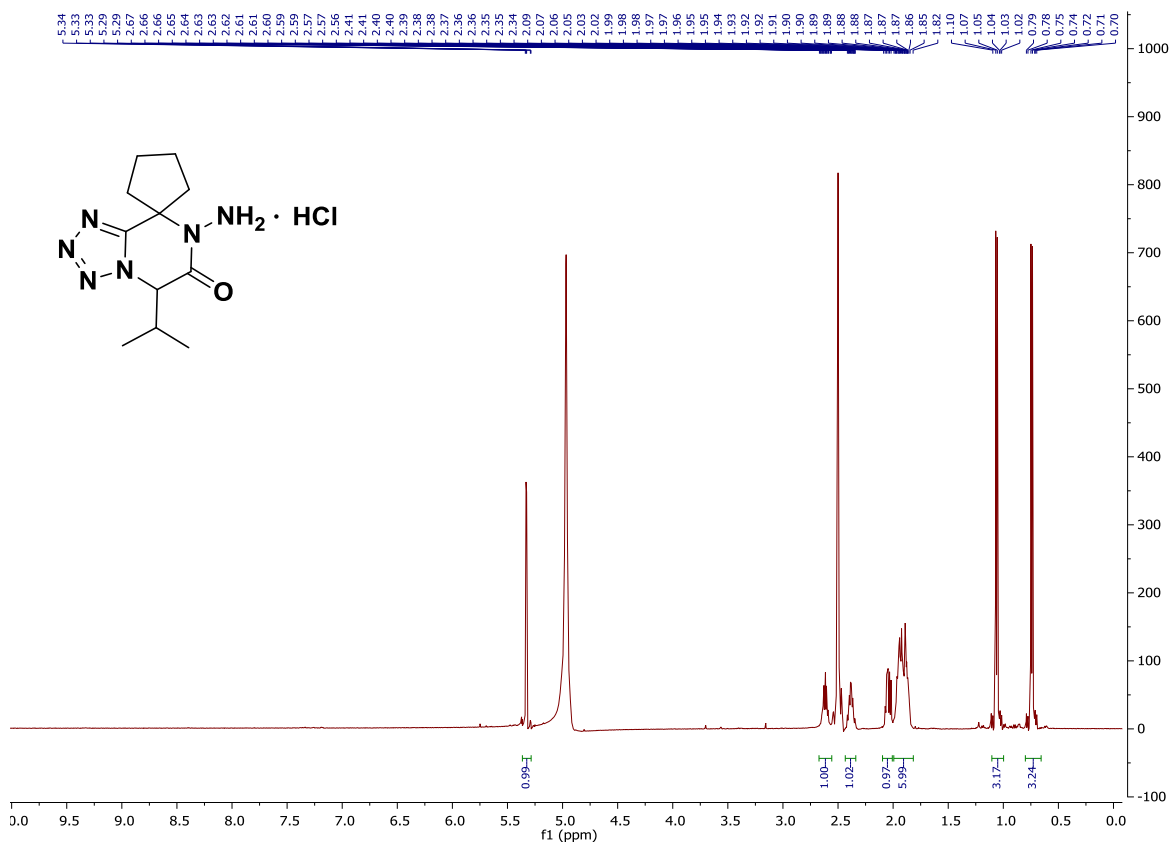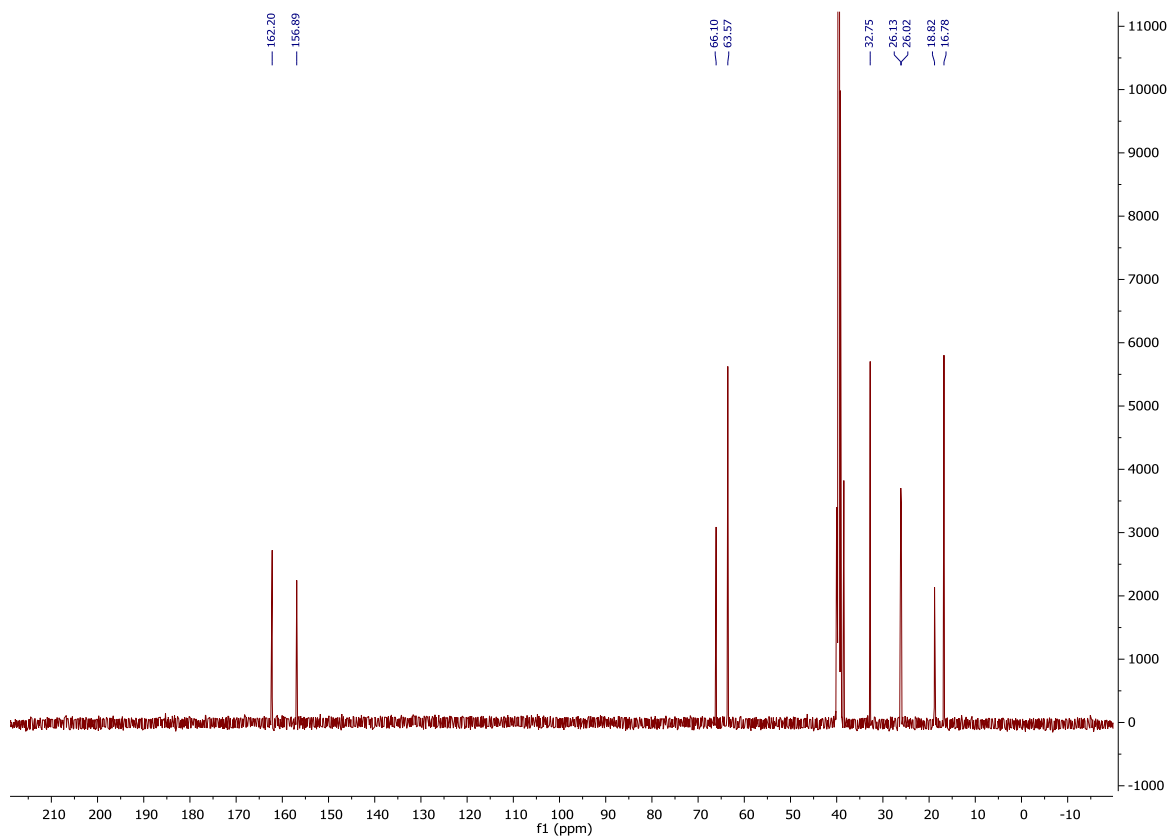

20170206\_ 17MDV021\_ YZ155 #200  
T: FTMS + p ESI Full ms [100.00-1000.00]

V: 1 NL: 2.50E7

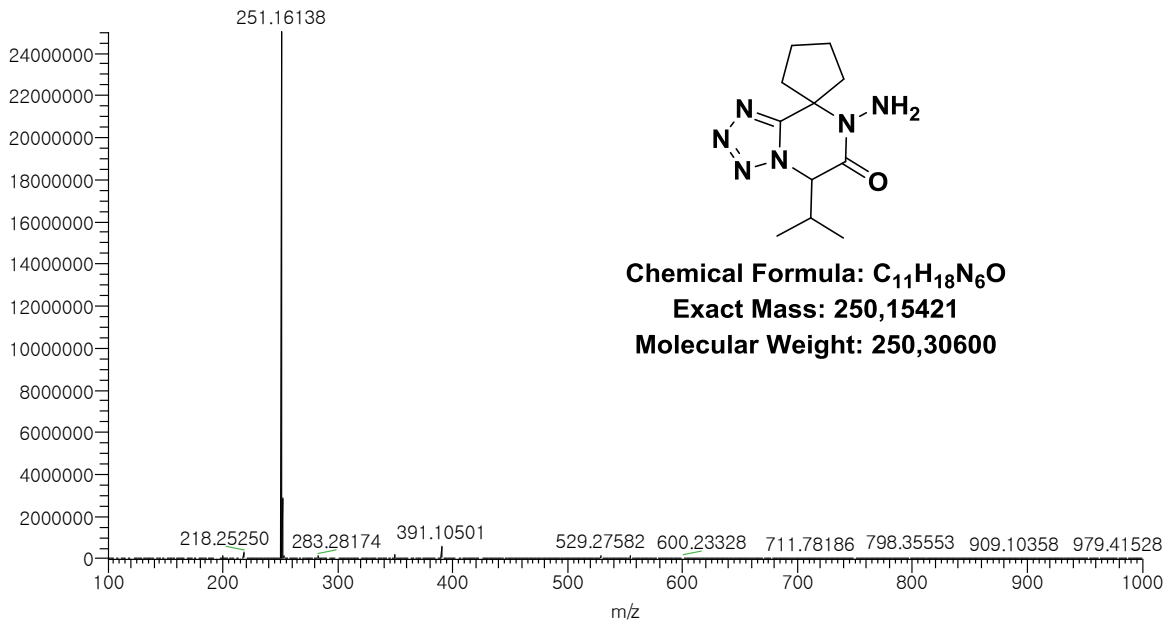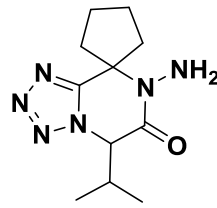

**Chemical Formula: C<sub>11</sub>H<sub>18</sub>N<sub>6</sub>O**

**Exact Mass: 250,15421**

**Molecular Weight: 250,30600**



yz160 #152 RT: 3.28529 AV: 1 NL: 2.8  
T: FTMS + p ESI Full ms [100.00-1000.00]

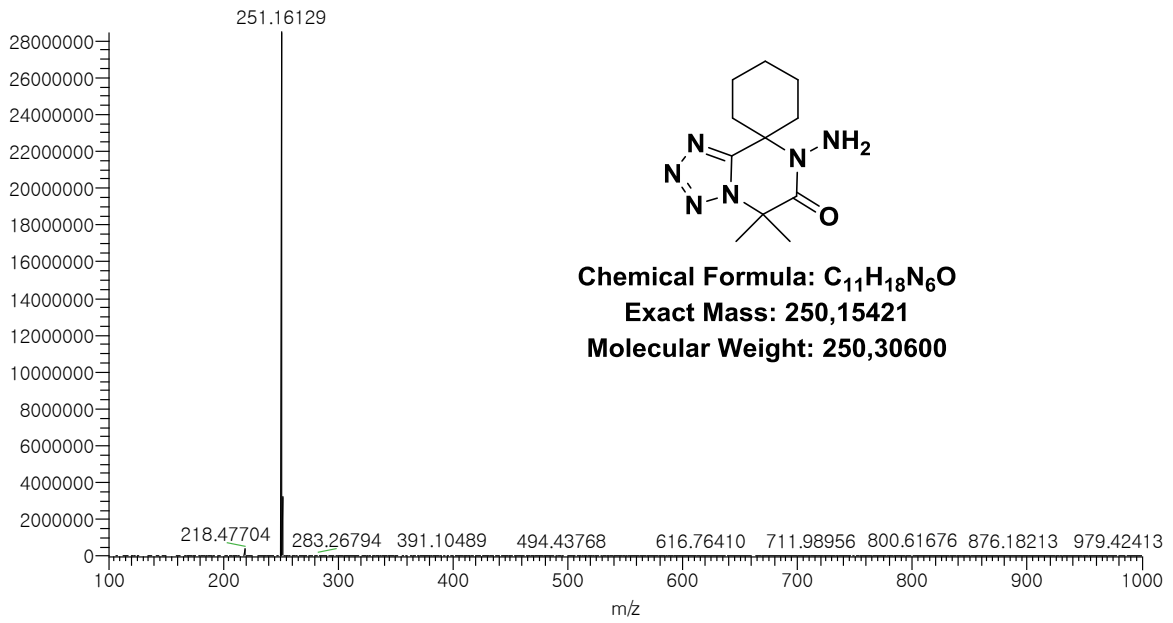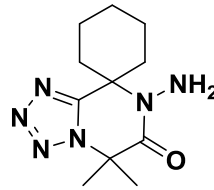

**Chemical Formula: C<sub>11</sub>H<sub>18</sub>N<sub>6</sub>O**

**Exact Mass: 250,15421**

**Molecular Weight: 250,30600**



**10: N-(5-isobutyl-8,8-dimethyl-6-oxo-5,6-dihydro-1H-tetrazolo[1,5-a]pyrazine-7(8H)-yl)acrylamide**

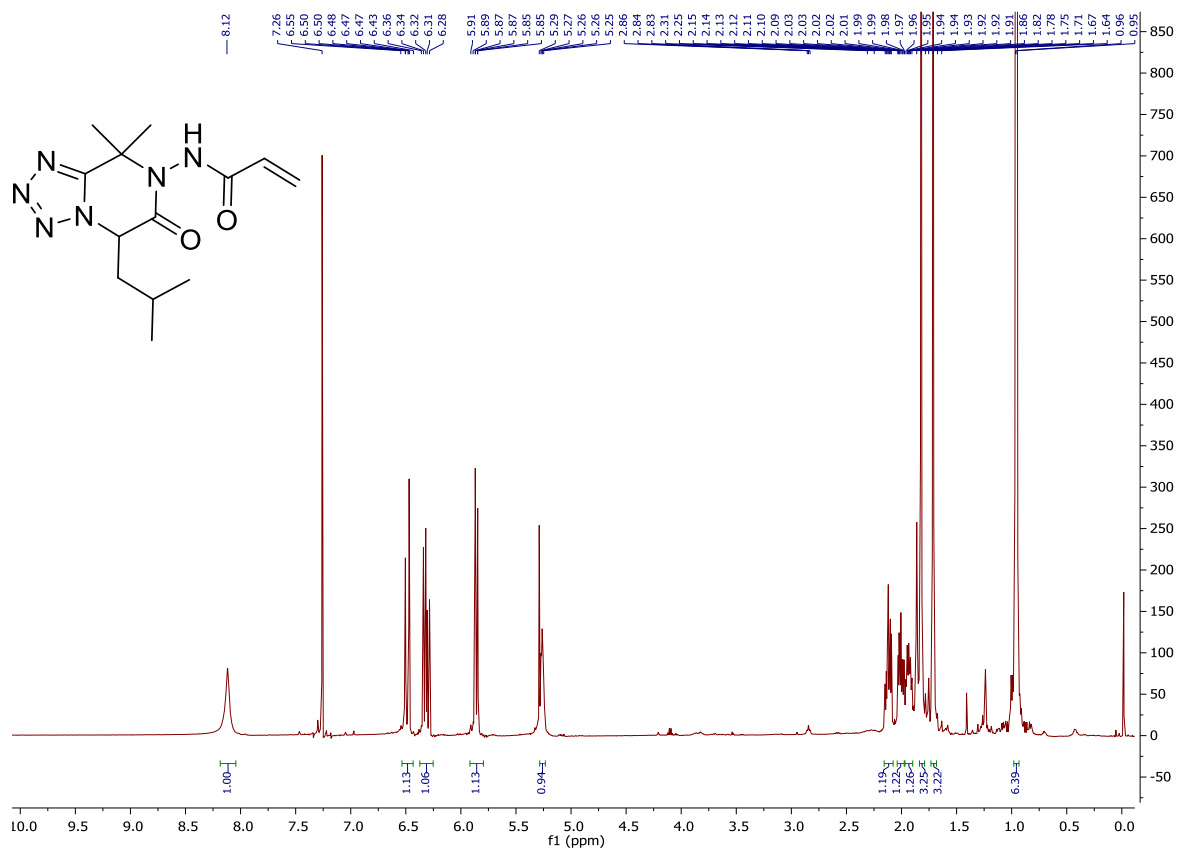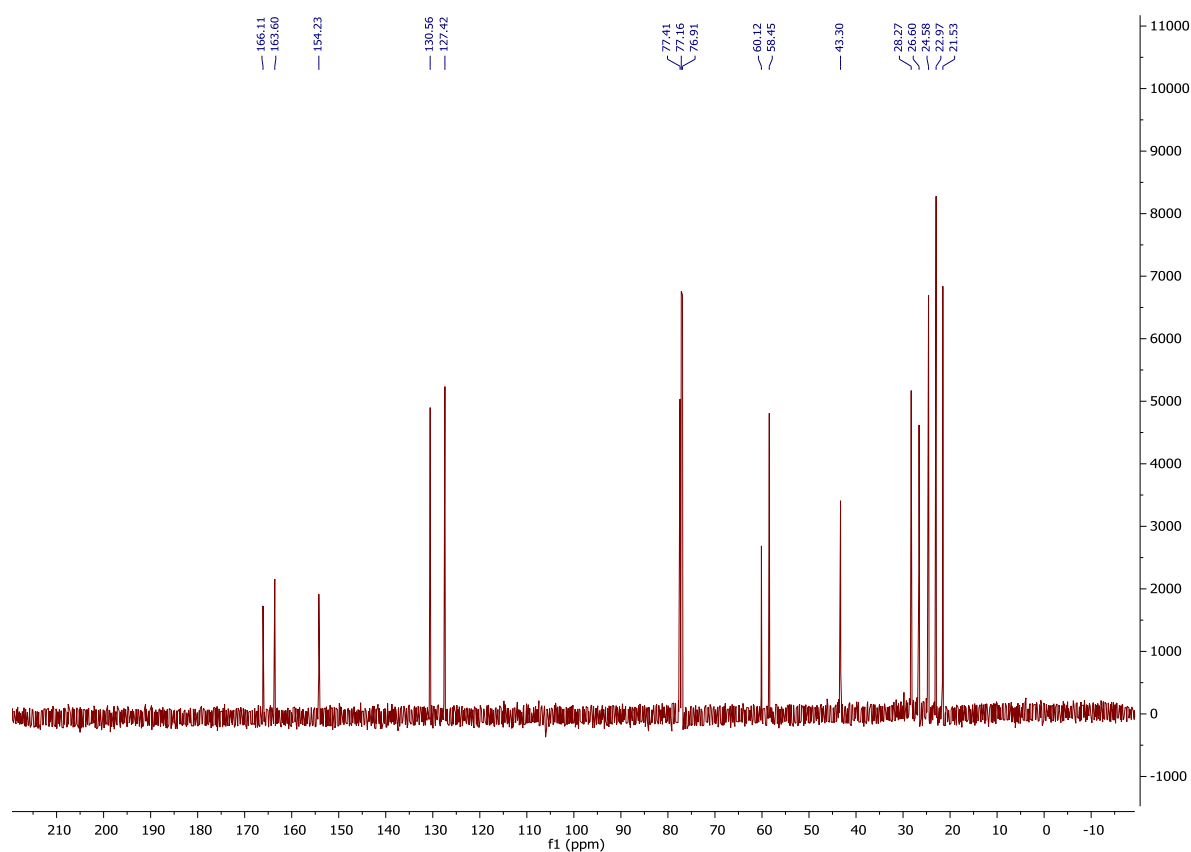

179 #17 RT: 0.29101 AV: 1 NL: 5.52E6  
T: FTMS +p ESI Full ms [150.00-750.00]

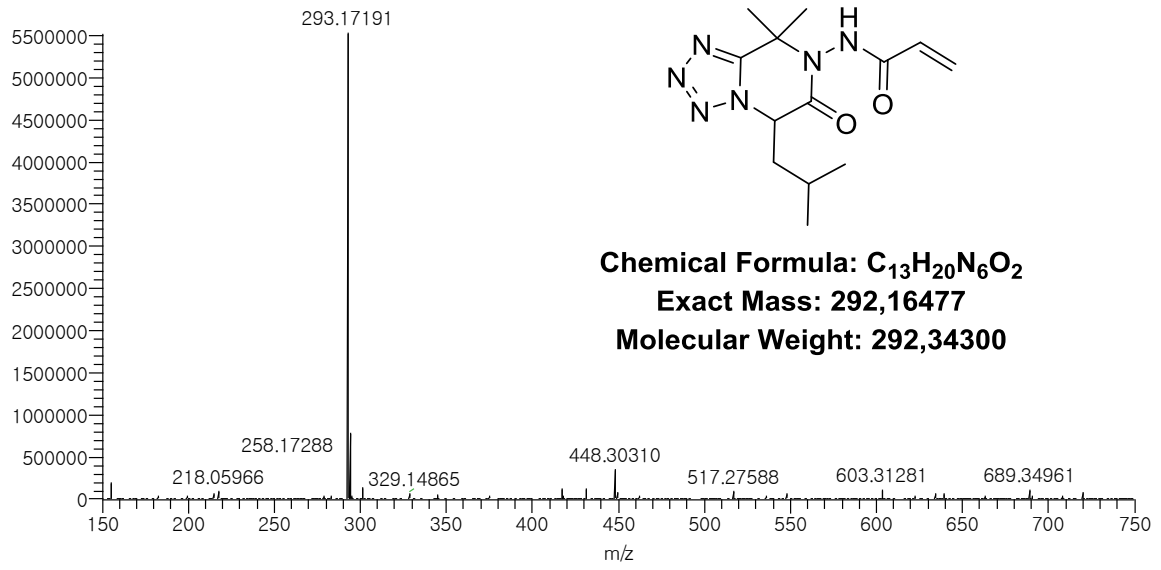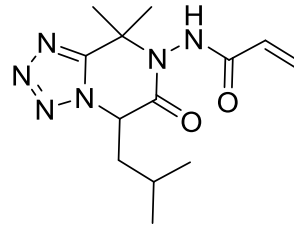

**Chemical Formula: C<sub>13</sub>H<sub>20</sub>N<sub>6</sub>O<sub>2</sub>**

**Exact Mass: 292,16477**

**Molecular Weight: 292,34300**

**11: 2-(4-chlorophenyl)-N-(5-isobutyl-8,8-dimethyl-6-oxo-5,6-dihydropyrazin-7 (8H)-yl)acetamide**

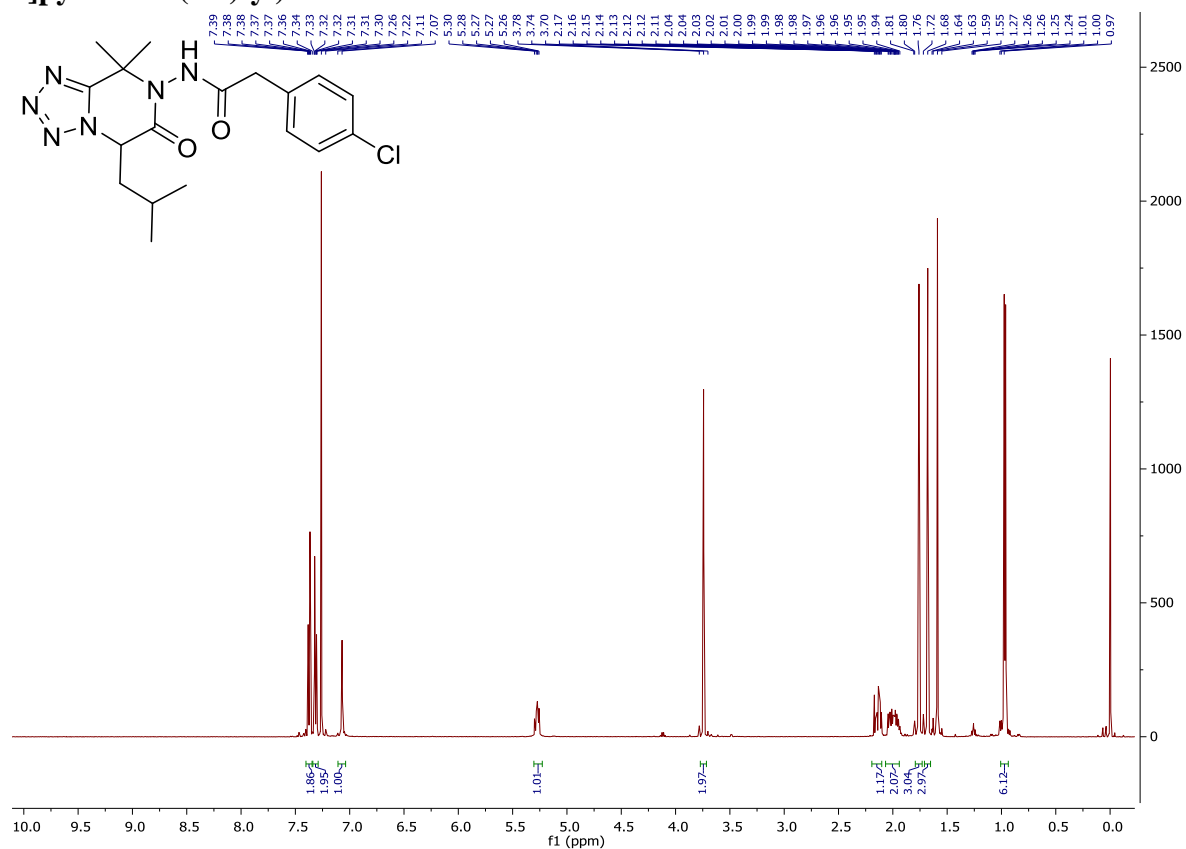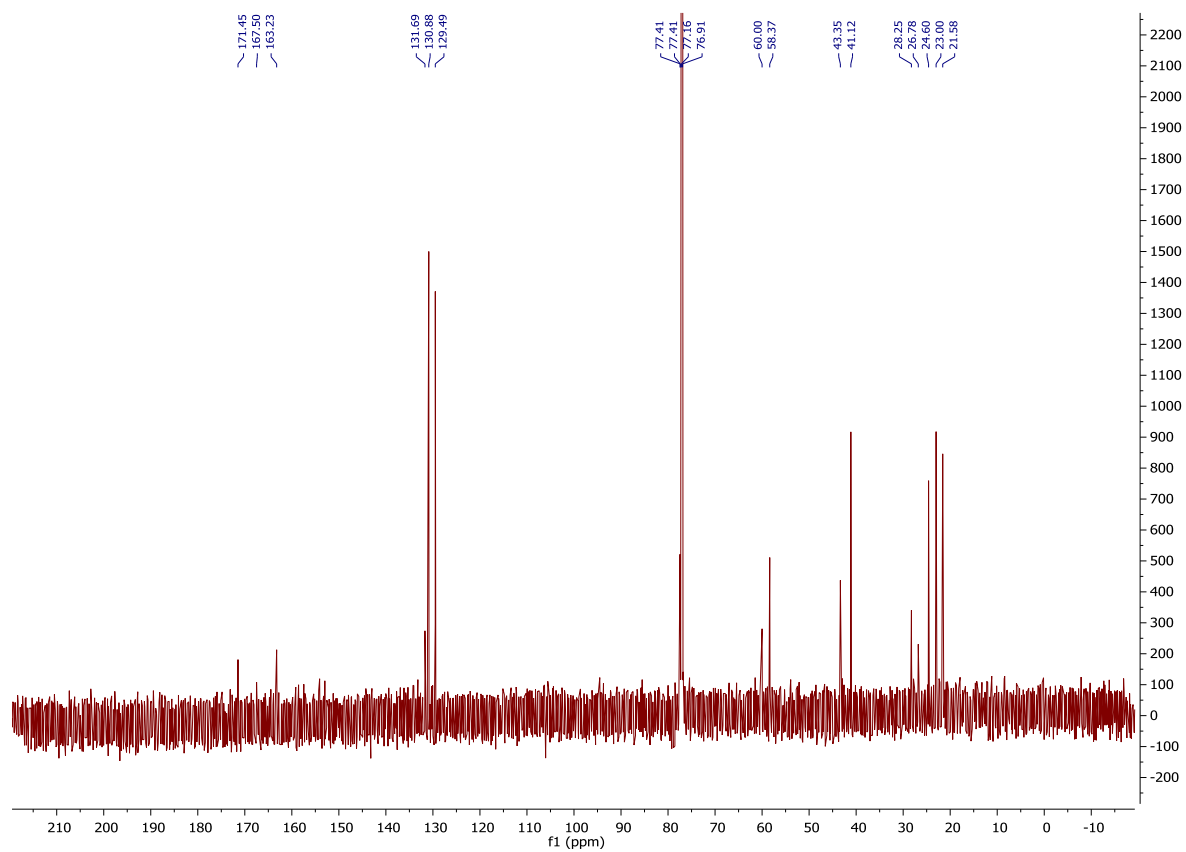

yz178repeat #10 RT: 0.17102 AV: 1 N  
T: FTMS + p ESI Full ms [150.00-750.00]

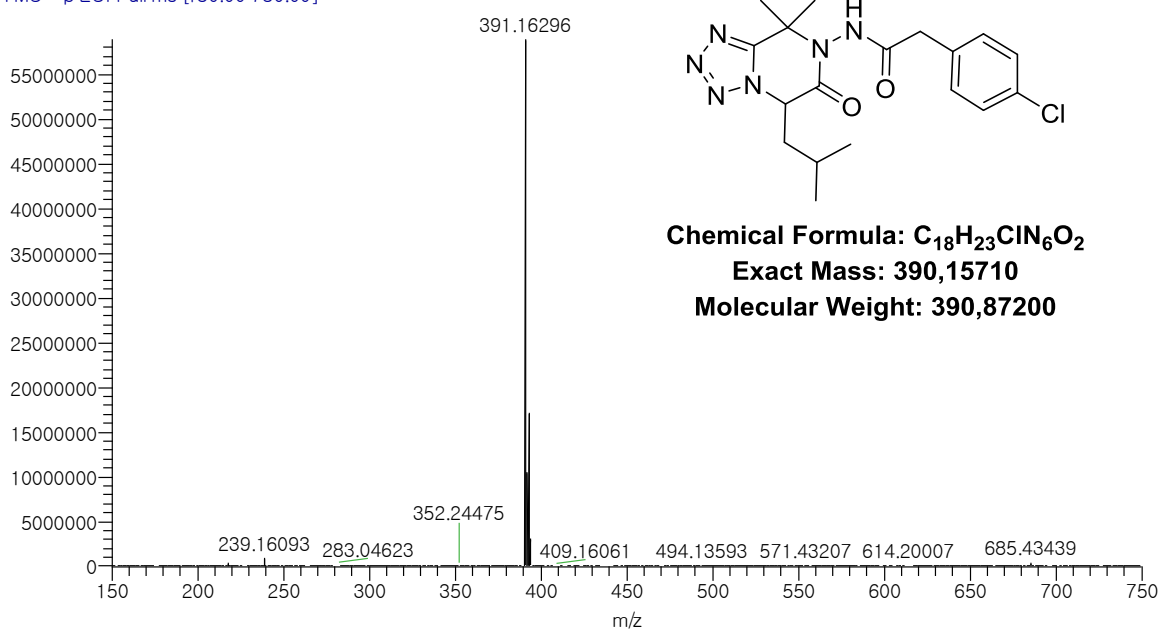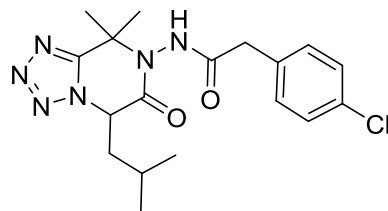

**Chemical Formula:** C<sub>18</sub>H<sub>23</sub>ClN<sub>6</sub>O<sub>2</sub>  
**Exact Mass:** 390,15710  
**Molecular Weight:** 390,87200

**12: N-(5-isobutyl-8,8-dimethyl-6-oxo-5,6-dihydro-1,2,4-triazolo[1,5-a]pyrazin-7(8H)-yl)-4-methyl-benzenesulfonamide**

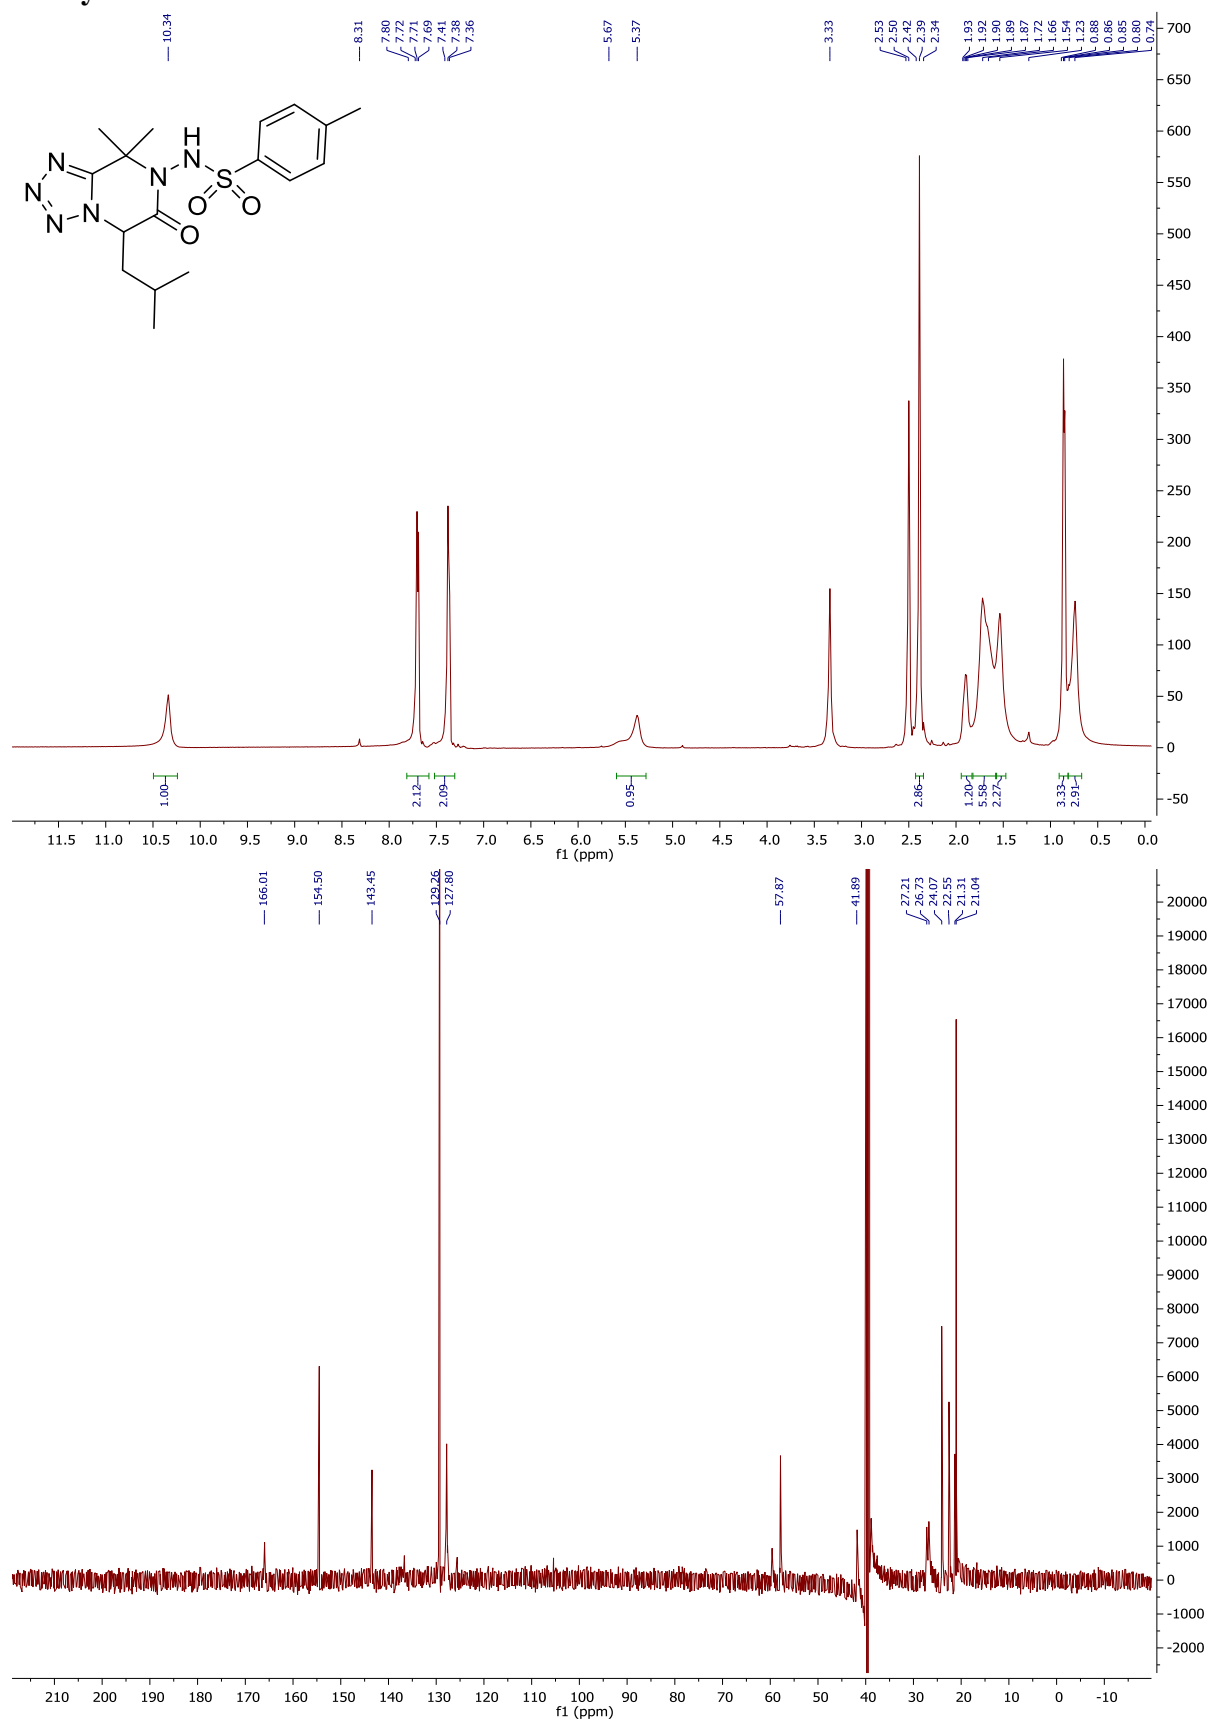

202 #19 RT: 0.31481 AV: 1 NL: 1.54E  
T: FTMS + p ESI Full ms [150.00-750.00]

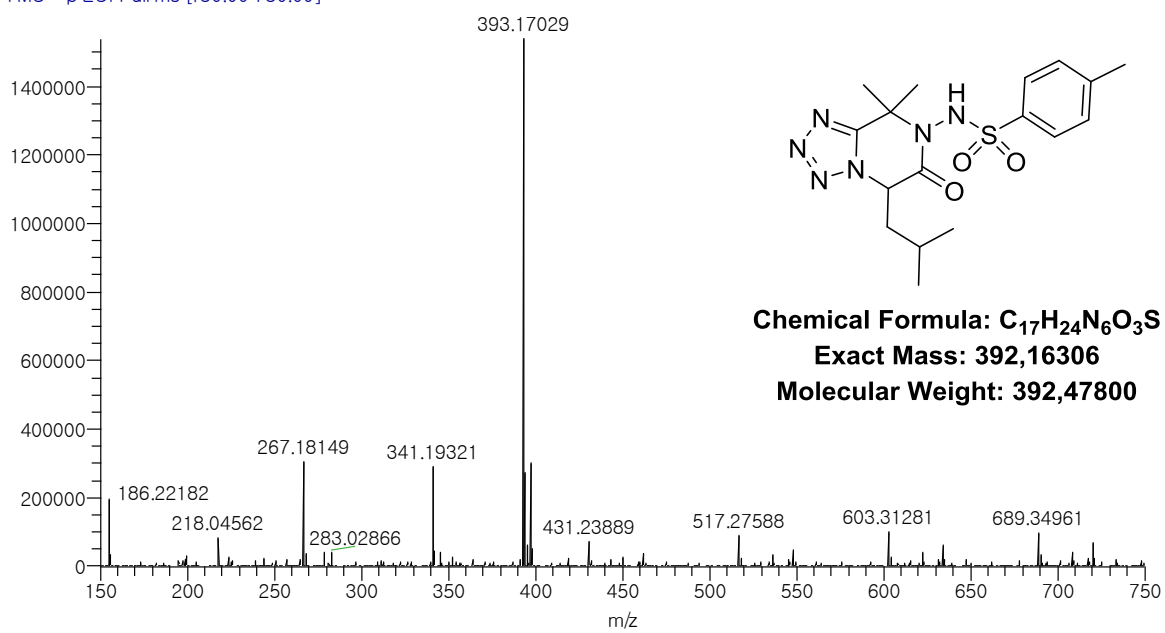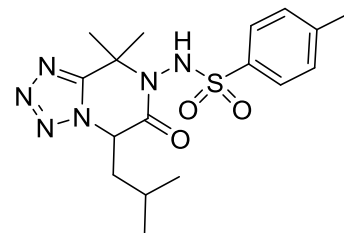

**Chemical Formula: C<sub>17</sub>H<sub>24</sub>N<sub>6</sub>O<sub>3</sub>S**  
**Exact Mass: 392,16306**  
**Molecular Weight: 392,47800**

**13: 1-(5-isobutyl-8,8-dimethyl-6-oxo-5,6-dihydro-1H-tetrazolo[1,5-a]pyrazin-7(8H)-yl)-3-phenylthiourea**

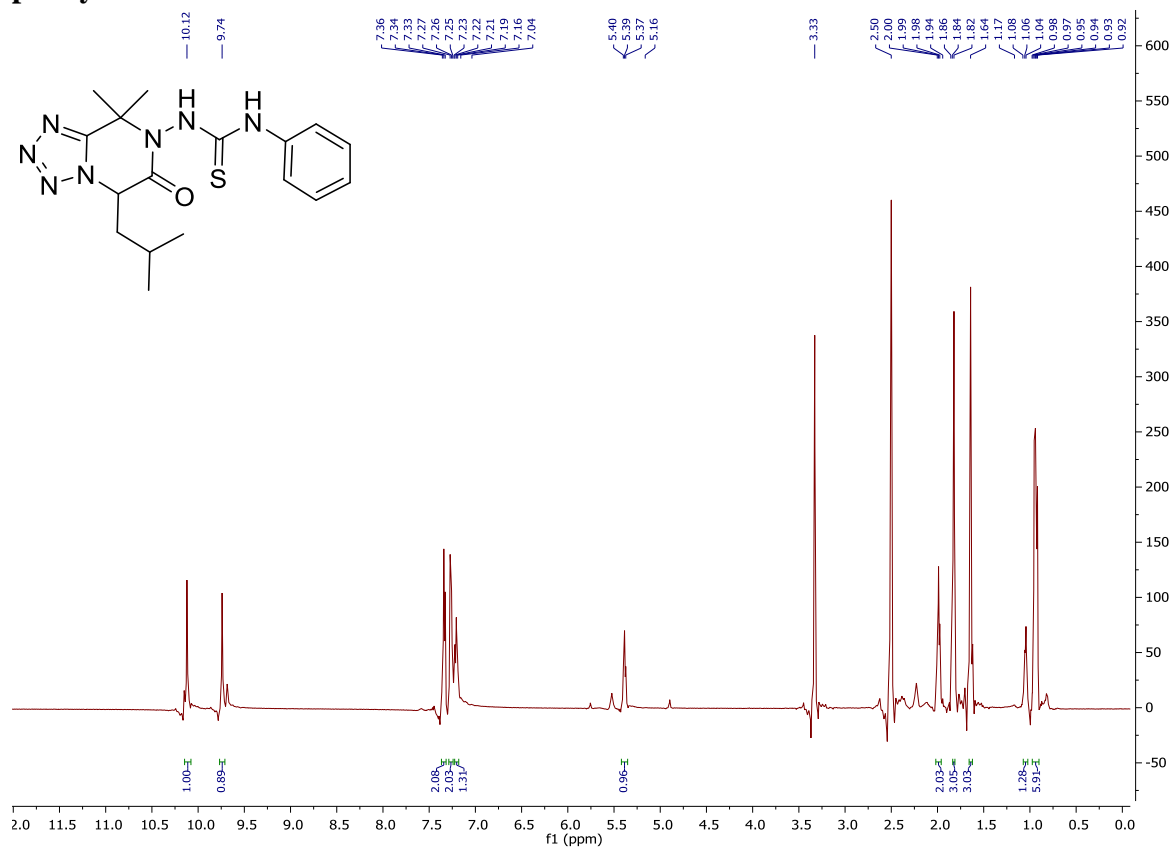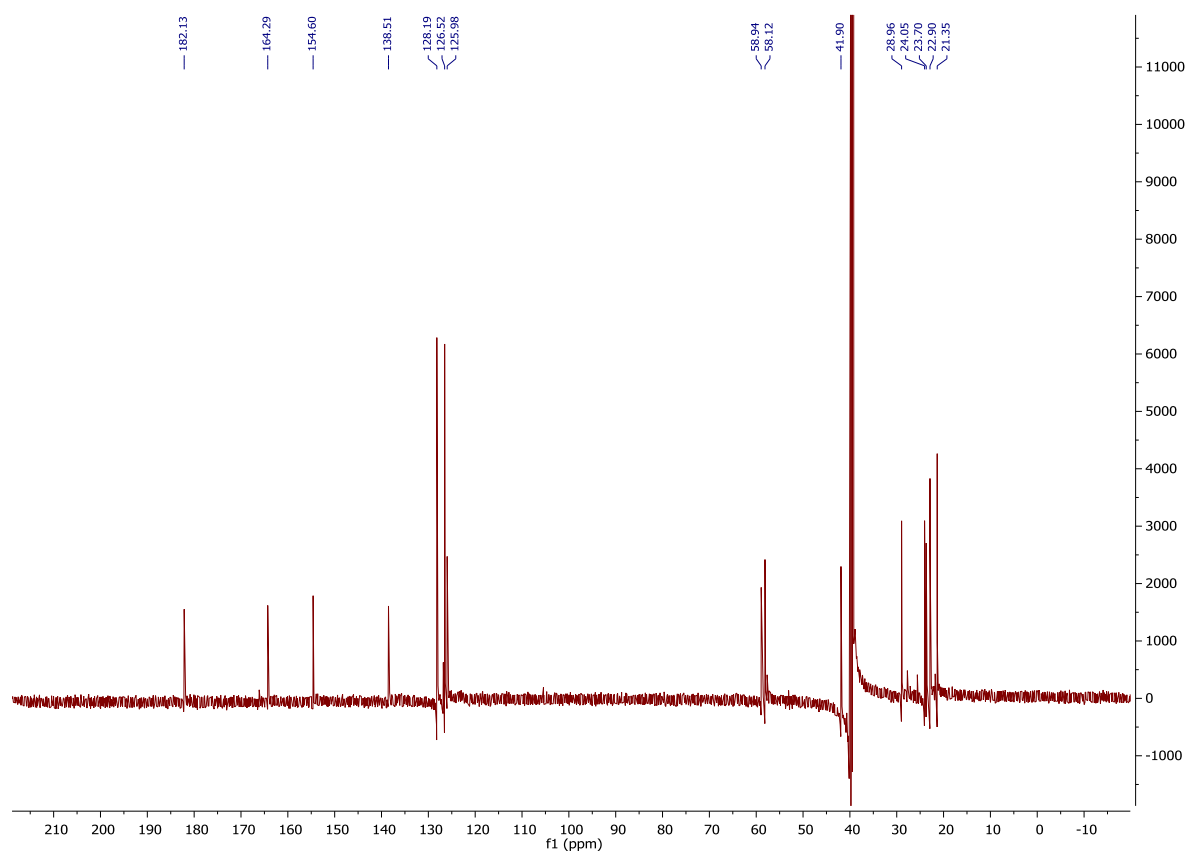

190 #18 RT: 0.31437 AV: 1 NL: 1.32E6  
T: FTMS +p ESI Full ms [150.00-750.00]

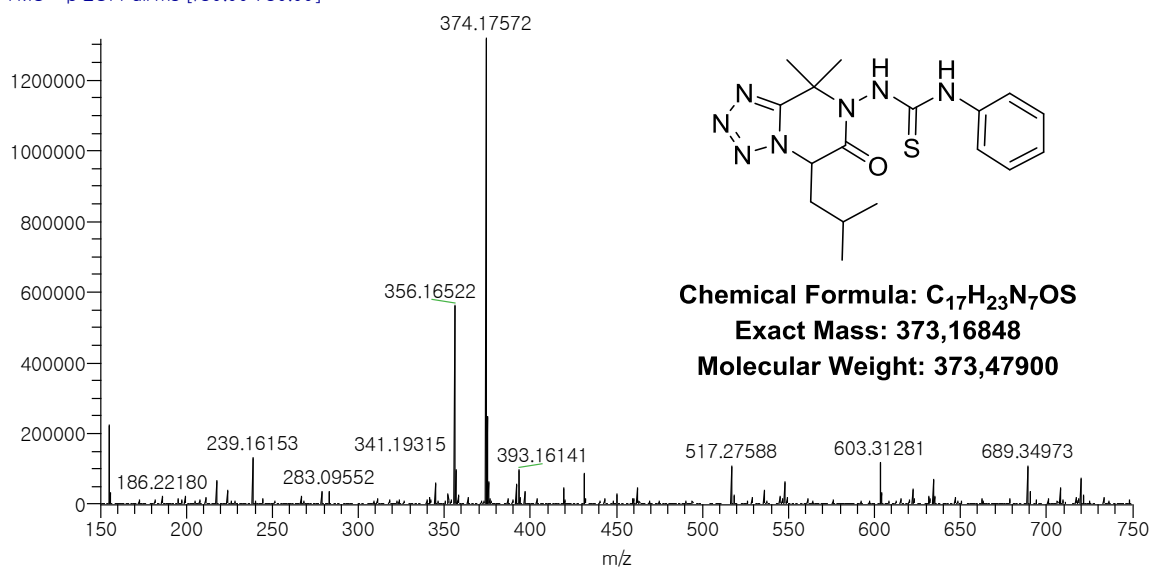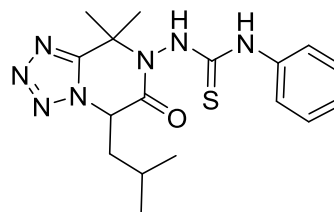

**Chemical Formula: C<sub>17</sub>H<sub>23</sub>N<sub>7</sub>OS**

**Exact Mass: 373,16848**

**Molecular Weight: 373,47900**



## Crystal structure determination

X-ray diffraction data for single crystals of compounds **5a**, **5d**, **6h**, **6j** and **7e** were collected using SuperNova (Rigaku - Oxford Diffraction) four circle diffractometer with a mirror monochromator and a microfocus MoK $\alpha$  radiation source ( $\lambda = 0.7107 \text{ \AA}$ ). Additionally, the diffractometer was equipped with a CryoJet HT cryostat system (Oxford Instruments) allowing low temperature experiments. Single crystals were mounted on MicroMounts<sup>TM</sup> and measured at temperature close to 130 K. The obtained data sets were processed with CrysAlisPro software [S1]. The phase problem was solved by direct methods using SHELXS [S2], SIR2002 [S3] or SUPERFLIP [S4]. Parameters of obtained models were refined by full-matrix least-squares on  $F^2$  using SHELXL-2014/6 [S2]. Calculations were performed using WinGX integrated system (ver. 2013.2) [S5]. Figures were prepared with Mercury 3.5 software [S6].

All non-hydrogen atoms in the crystal structures of **5a**, **5d**, **6h**, **6j** and **7e** were refined anisotropically to ensure the convergence of the refinement process. All hydrogen atoms attached to carbon atoms were positioned with the idealised geometry and refined using the riding model with the isotropic displacement parameter  $U_{\text{iso}}[\text{H}] = 1.2$  (or 1.5)  $U_{\text{eq}}[\text{C}]$ . The position of hydrogen atoms linked to the N atoms were found on the difference Fourier map and refined with no restraints on the isotropic displacement parameter. Crystal data and structure refinement results for compounds **5a**, **5d**, **6h**, **6j** and **7e** are shown in Table S1.

In the crystal structure of compound **6j** a conformational disorder is observed for the cyclopentane fragment. The two alternative conformations were modelled with 88% and 12% refined site occupancies.

Crystallographic data for structures presented in this paper have been deposited with the Cambridge Crystallographic Data Centre as supplementary publication nos. CCDC 1507439 (**6h**), CCDC 1507441 (**7e**), CCDC 1507084 (**5a**), CCDC 1507110 (**5d**), CCDC 1507440 (**6j**). Copies of the data can be obtained, free of charge, on application to CCDC, 12 Union Road, Cambridge CB2 1EZ, UK, (fax: +44-(0)1223-336033 or e-mail: deposit@ccdc.cam.ac.uk).

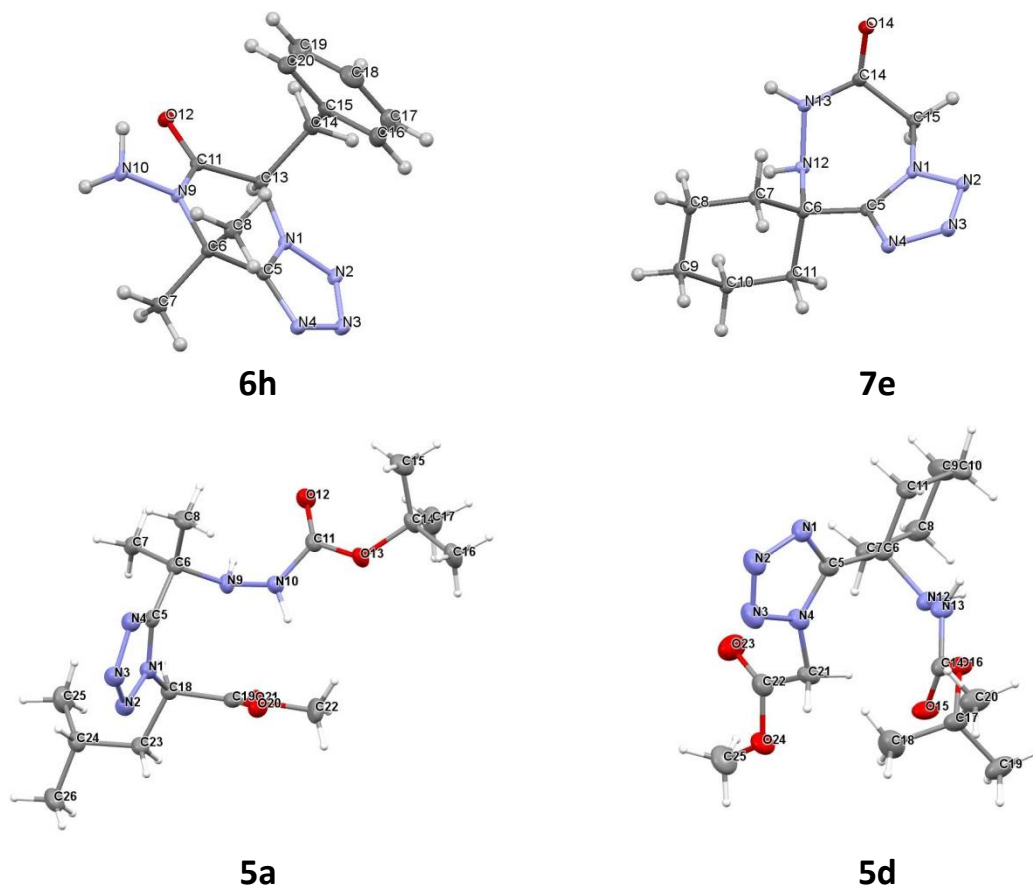

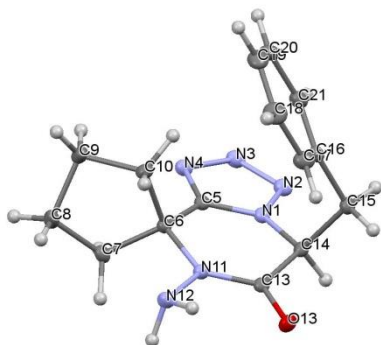

### 6j

**Figure 1.** Molecular geometry observed in the crystal structures of compounds **1-5**, showing the atom labelling scheme. In case of partially disordered molecule of compound **5** only the more abundant conformation is shown, with the site occupancy 88%. Displacement ellipsoids of non-hydrogen atoms are drawn at the 30% probability level. H atoms are presented as small spheres with an arbitrary radius.

Table S1. Crystal data and structure refinement results for compounds **1-5**.

|                                        | <b>1</b><br><b>6h</b>                                                                           | <b>2</b><br><b>7e</b>                                                                            | <b>3</b><br><b>5a</b>                                                                                 | <b>4</b><br><b>5d</b>                                                                              | <b>5</b><br><b>6j</b>                                                                         |
|----------------------------------------|-------------------------------------------------------------------------------------------------|--------------------------------------------------------------------------------------------------|-------------------------------------------------------------------------------------------------------|----------------------------------------------------------------------------------------------------|-----------------------------------------------------------------------------------------------|
| Empirical moiety formula               | C <sub>13</sub> H <sub>16</sub> N <sub>6</sub> O                                                | C <sub>9</sub> H <sub>14</sub> N <sub>6</sub> O                                                  | C <sub>16</sub> H <sub>30</sub> N <sub>6</sub> O <sub>4</sub>                                         | C <sub>15</sub> H <sub>26</sub> N <sub>6</sub> O <sub>4</sub>                                      | C <sub>15</sub> H <sub>18</sub> N <sub>6</sub> O                                              |
| Formula weight [g/mol]                 | 544.63                                                                                          | 222.26                                                                                           | 370.46                                                                                                | 354.42                                                                                             | 298.35                                                                                        |
| Temperature [K]                        | 130(2)                                                                                          | 130(2)                                                                                           | 130(10)                                                                                               | 134(5)                                                                                             | 130(2)                                                                                        |
| Wavelength [Å]                         | 0.7107                                                                                          | 0.7107                                                                                           | 0.7107                                                                                                | 0.7107                                                                                             | 0.7107                                                                                        |
| Crystal system                         | Monoclinic                                                                                      | Monoclinic                                                                                       | Monoclinic                                                                                            | Monoclinic                                                                                         | Monoclinic                                                                                    |
| Space group                            | I2/a                                                                                            | P2 <sub>1</sub> /c                                                                               | P2 <sub>1</sub> /c                                                                                    | C2/c                                                                                               | P2 <sub>1</sub> /c                                                                            |
| Unit cell dimensions                   | a = 14.3819(6)<br>Å<br>b = 8.1017(3) Å<br>c = 23.2784(9)<br>Å<br>α=90°<br>β=91.397(4)°<br>γ=90° | a = 10.7348(5)<br>Å<br>b = 9.1446(3) Å<br>c = 11.7753(6)<br>Å<br>α=90°<br>β=116.418(6)°<br>γ=90° | a=22.7944(8)<br>Å<br>b=7.5374(2)<br>Å<br>c=12.1001(4)<br>Å<br>α=90.0°<br>β=102.072(4)<br>°<br>γ=90.0° | a=15.8975(6)<br>Å<br>b=12.9679(3)<br>Å<br>c=19.3594(9)<br>Å<br>α=90°<br>β=115.611(5)<br>°<br>γ=90° | a=11.5427(4)<br>Å<br>b=8.6359(3)<br>Å<br>c=14.61473(5)<br>Å<br>α=90°<br>β=93.932(3)°<br>γ=90° |
| Volume [Å <sup>3</sup> ]               | 2711.54(18)                                                                                     | 1035.22(9)                                                                                       | 2032.94(13)                                                                                           | 3599.0(3)                                                                                          | 1453.39(9)                                                                                    |
| Z                                      | 4                                                                                               | 4                                                                                                | 4                                                                                                     | 8                                                                                                  | 4                                                                                             |
| D <sub>calc</sub> [Mg/m <sup>3</sup> ] | 1.334                                                                                           | 1.426                                                                                            | 1.210                                                                                                 | 1.308                                                                                              | 1.364                                                                                         |
| μ [mm <sup>-1</sup> ]                  | 0.091                                                                                           | 0.101                                                                                            | 0.089                                                                                                 | 0.097                                                                                              | 0.092                                                                                         |
| F(000)                                 | 1152                                                                                            | 472                                                                                              | 800                                                                                                   | 1520                                                                                               | 632                                                                                           |
| Crystal size [mm <sup>3</sup> ]        | 0.6 x 0.6 x 0.3                                                                                 | 0.6 x 0.6 x 0.4                                                                                  | 0.6 x 0.6 x 0.4                                                                                       | 0.4 x 0.4 x 0.2                                                                                    | 0.5 x 0.4 x 0.3                                                                               |
| θ range                                | 2.89° to 28.53°                                                                                 | 2.95° to 29.41°                                                                                  | 2.91° to 28.62°                                                                                       | 3.14° to 28.51°                                                                                    | 2.95° to 30.32°                                                                               |
| Index ranges                           | -18 ≤ h ≤ 15,<br>-10 ≤ k ≤ 10,<br>-30 ≤ l ≤ 29                                                  | -14 ≤ h ≤ 14,<br>-12 ≤ k ≤ 12,<br>-16 ≤ l ≤ 15                                                   | -30 ≤ h ≤ 30,<br>-10 ≤ k ≤ 9,<br>-9 ≤ l ≤ 16                                                          | -20 ≤ h ≤ 21,<br>-16 ≤ k ≤ 17,<br>-25 ≤ l ≤ 25                                                     | -16 ≤ h ≤ 15,<br>-11 ≤ k ≤ 11,<br>-20 ≤ l ≤ 20                                                |
| Refl. collected                        | 11596                                                                                           | 14724                                                                                            | 16329                                                                                                 | 12175                                                                                              | 22705                                                                                         |
| Independent reflections                | 3188<br>[R(int) = 0.0289]                                                                       | 2711<br>[R(int) = 0.0519]                                                                        | 4756<br>[R(int) = 0.0347]                                                                             | 4562<br>[R(int) = 0.0433]                                                                          | 4117<br>[R(int) = 0.0696]                                                                     |
| Completeness [%] to θ                  | 99.9 (θ 25.24°)                                                                                 | 99.9 (θ 25.24°)                                                                                  | 99.8 (θ 26.31°)                                                                                       | 99.9 (θ 26.31°)                                                                                    | 99.9 (θ 25.24°)                                                                               |

| Absorption correction                                       | Multi-scan                                  | Multi-scan                                  | Multi-scan                                  | Multi-scan                                  | Multi-scan                                  |
|-------------------------------------------------------------|---------------------------------------------|---------------------------------------------|---------------------------------------------|---------------------------------------------|---------------------------------------------|
| Max. and min. transmission                                  | 0.588 and 1.000                             | 0.662 and 1.000                             | 0.791 and 1.000                             | 0.710 and 1.000                             | 0.538 and 1.000                             |
| Refinement method                                           | Full-matrix least-squares on F <sup>2</sup> |
| Data/restraints/parameters                                  | 3188 / 0 / 192                              | 2711 / 0 / 154                              | 4756 / 0 / 252                              | 4139 / 0 / 238                              | 4117 / 2 / 226                              |
| Goof on F2                                                  | 1.047                                       | 1.051                                       | 1.048                                       | 0.998                                       | 1.092                                       |
| Final R indices [I>2sigma(I)]                               | R1= 0.0365, wR2= 0.0876                     | R1= 0.0436, wR2= 0.0933                     | R1= 0.0414, wR2= 0.1003                     | R1= 0.0427, wR2= 0.0984                     | R1= 0.0502, wR2= 0.1189                     |
| R indices (all data)                                        | R1= 0.0450, wR2= 0.0945                     | R1= 0.0624, wR2= 0.1052                     | R1= 0.0585, wR2= 0.1003                     | R1= 0.0629, wR2= 0.1104                     | R1= 0.0723, wR2= 0.1346                     |
| $\Delta\rho_{\max}, \Delta\rho_{\min}$ [e·Å <sup>-3</sup> ] | 0.35 and -0.21                              | 0.34 and -0.24                              | 0.26 and -0.18                              | 0.28 and -0.19                              | 0.33 and -0.28                              |

## References:

- [S1] Oxford Diffraction (2006). CrysAlis<sup>Pro</sup> Oxford Diffraction Ltd, Abingdon, England, Version 1.171.36.20 (release 27-06-2012 CrysAlis171.NET)
- [S2] Sheldrick, G. M. A short history of SHELX *Acta Cryst.* **2008**, *A64*, 112-122.
- [S3] Burla, M. C.; Camalli, M.; Carrozzini, B.; Cascarano, G. L.; Giacovazzo, C.; Polidori, G.; Spagna, R. SIR2002: the program. *J. Appl. Cryst.*, **2003**, *36*, 1103.
- [S4] Palatinus, L. Chapuis, G., SUPERFLIP - a computer program for the solution of crystal structures by charge flipping in arbitrary dimensions. *J. Appl. Cryst.* **2007**, *40*, 786-790.
- [S5] Farrugia, L., J. WinGX suite for small- molecule single-crystal crystallography. *J. Appl. Cryst.* **1999**, *32*, 837-838.
- [S6] Macrae, C. F.; Edgington, P.R.; McCabe, P.; Pidcock, E.; Shields, G.P.; Taylor, R.; Towler, M.; van de Streek, J.; Mercury: visualization and analysis of crystal structures. *J. Appl. Cryst.* **2006**, *39*, 453-457.
